# Supplementary material for: An atlas of cell type specific regulatory effects in cattle
Source: Research Square preprint supplement (doi:10.21203/rs.3.rs-6956718/v1), 2025-07-10
Supplement: Supplementary file 2 [file e50f4945dbbf55ceb5e5d577.xlsx]

## Sheet: Supplementary Table 1
Table S1. Summary of bulk RNA-Seq samples colletced from the CattleGTEx project.
BioSample	BioProject	Organism	Tissue.Cell.subtypes	Tissue.Cell.type	Predict_Tissue	Organ.System	Predict_System	Sex	BREED	BREED_new	Instrument	Age	Release_Date	Predict_breed	Predict_sex	Feature_sex	Stage
SAMD00112301	PRJDB6759	Bos taurus	Uterine Cervix	Uterus	Uterus	Female Reproductive System	Female Reproductive System	Female	Holstein	Holstein	Illumina HiSeq 2500	Unknown	2020-02-08	Holstein	Female	Female	Stage5
SAMD00112302	PRJDB6759	Bos taurus	Uterine Cervix	Uterus	Uterus	Female Reproductive System	Female Reproductive System	Female	Holstein	Holstein	Illumina HiSeq 2500	Unknown	2020-02-08	Holstein	Female	Female	Unknown
SAMD00112303	PRJDB6759	Bos taurus	Uterine Cervix	Uterus	Uterus	Female Reproductive System	Female Reproductive System	Female	Holstein	Holstein	Illumina HiSeq 2500	Unknown	2020-02-08	Holstein	Female	Female	Stage5
SAMD00112304	PRJDB6759	Bos taurus	Uterine Cervix	Uterus	Uterus	Female Reproductive System	Female Reproductive System	Female	Holstein	Holstein	Illumina HiSeq 2500	Unknown	2020-02-08	Holstein	Female	Female	Unknown
SAMD00112306	PRJDB6759	Bos taurus	Uterine Cervix	Uterus	Uterus	Female Reproductive System	Female Reproductive System	Female	Holstein	Holstein	Illumina HiSeq 2500	Unknown	2020-02-08	Holstein	Female	Female	Stage5
SAMD00259528	PRJDB10813	Bos taurus	Uterus	Uterus	Uterus	Female Reproductive System	Female Reproductive System	Female	Holstein	Holstein	Illumina HiSeq 2500	Unknown	2022-10-25	Holstein	Female	Female	Stage5
SAMD00259532	PRJDB10813	Bos taurus	Uterus	Uterus	Uterus	Female Reproductive System	Female Reproductive System	Female	Holstein	Holstein	Illumina HiSeq 2500	Unknown	2022-10-25	Holstein	Female	Female	Unknown
SAMD00259533	PRJDB10813	Bos taurus	Uterus	Uterus	Uterus	Female Reproductive System	Female Reproductive System	Female	Holstein	Holstein	Illumina HiSeq 2500	Unknown	2022-10-25	Holstein	Female	Female	Unknown
SAMD00453086	PRJDB13377	Bos taurus	Peripheral Blood	Blood	Blood	Immune System	Immune System	Female	Japanese Brown cattle	Japanese Brown	HiSeq X Ten	Unknown	2022-04-19	Japanese Brown	Female	Female	Unknown
SAMD00453087	PRJDB13377	Bos taurus	Peripheral Blood	Blood	Blood	Immune System	Immune System	Female	Japanese Brown cattle	Japanese Brown	HiSeq X Ten	Unknown	2022-04-19	Japanese Brown	Female	Female	Unknown
SAMD00453088	PRJDB13377	Bos taurus	Peripheral Blood	Blood	Blood	Immune System	Immune System	Female	Japanese Brown cattle	Japanese Brown	HiSeq X Ten	Unknown	2022-04-19	Japanese Brown	Female	Female	Unknown
SAMD00453089	PRJDB13377	Bos taurus	Peripheral Blood	Blood	Blood	Immune System	Immune System	Female	Japanese Brown cattle	Japanese Brown	HiSeq X Ten	Unknown	2022-04-19	Japanese Brown	Female	Female	Unknown
SAMD00453090	PRJDB13377	Bos taurus	Peripheral Blood	Blood	Blood	Immune System	Immune System	Female	Japanese Brown cattle	Japanese Brown	HiSeq X Ten	Unknown	2022-04-19	Japanese Brown	Female	Female	Unknown
SAMD00453091	PRJDB13377	Bos taurus	Peripheral Blood	Blood	Blood	Immune System	Immune System	Female	Japanese Brown cattle	Japanese Brown	HiSeq X Ten	Unknown	2022-04-19	Japanese Brown	Female	Female	Unknown
SAMD00453093	PRJDB13377	Bos taurus	Peripheral Blood	Blood	Blood	Immune System	Immune System	Female	Japanese Brown cattle	Japanese Brown	HiSeq X Ten	Unknown	2022-04-19	Japanese Brown	Female	Female	Unknown
SAMD00453094	PRJDB13377	Bos taurus	Peripheral Blood	Blood	Blood	Immune System	Immune System	Female	Japanese Brown cattle	Japanese Brown	HiSeq X Ten	Unknown	2022-04-19	Japanese Brown	Female	Female	Unknown
SAMD00532378	PRJDB14299	Bos taurus	Lymph Node	Lymph Node	Lymph Node	Immune System	Immune System	Unknown	Holstein	Holstein	Illumina NovaSeq 6000	Unknown	2023-03-31	Holstein	Female	Female	Unknown
SAMD00532379	PRJDB14299	Bos taurus	Lymph Node	Lymph Node	Lymph Node	Immune System	Immune System	Unknown	Holstein	Holstein	Illumina NovaSeq 6000	Unknown	2023-03-31	Holstein	Male	Male	Stage3
SAMEA103988700	PRJEB42490	Bos taurus	Cerebellum	CNS	CNS	Nervous System	Nervous System	Unknown	Unknown	Unknown	Illumina NovaSeq 6000	1532 days	2021-01-31	Holstein	Female	Female	Stage5
SAMEA103989324	PRJEB42490	Bos taurus	Lung Parenchyma	Lung	Lung	Respiratory System	Respiratory System	Unknown	Unknown	Unknown	Illumina NovaSeq 6000	539 days	2021-01-31	Holstein	Male	Male	Unknown
SAMEA103989656	PRJEB27455	Bos taurus	Liver Parenchyma	Liver	Liver	Liver	Liver	Unknown	Unknown	Unknown	Illumina HiSeq 3000	1250 days	2018-07-04	Holstein	Female	Female	Stage5
SAMEA103989694	PRJEB27455	Bos taurus	Liver Parenchyma	Liver	Liver	Liver	Liver	Unknown	Unknown	Unknown	Illumina HiSeq 3000	1532 days	2018-07-04	Holstein	Female	Female	Stage5
SAMEA103989800	PRJEB27455	Bos taurus	Liver Parenchyma	Liver	Liver	Liver	Liver	Unknown	Unknown	Unknown	Illumina HiSeq 3000	539 days	2018-07-04	Holstein	Male	Male	Unknown
SAMEA103989857	PRJEB42490	Bos taurus	Testis	Testis	Testis	Male Reproductive System	Male Reproductive System	Male	Unknown	Unknown	Illumina NovaSeq 6000	539 days	2021-01-31	Holstein	Male	Male	Stage4
SAMEA103990241	PRJEB42490	Bos taurus	Lung Parenchyma	Lung	Lung	Respiratory System	Respiratory System	Unknown	Unknown	Unknown	Illumina NovaSeq 6000	1532 days	2021-01-31	Holstein	Female	Female	Stage5
SAMEA103990470	PRJEB42490	Bos taurus	Lung Parenchyma	Lung	Lung	Respiratory System	Respiratory System	Unknown	Unknown	Unknown	Illumina NovaSeq 6000	602 days	2021-01-31	Holstein	Unknown	Male	Unknown
SAMEA103991636	PRJEB27455	Bos taurus	Liver Parenchyma	Liver	Liver	Liver	Liver	Unknown	Unknown	Unknown	Illumina HiSeq 3000	602 days	2018-07-04	Holstein	Male	Male	Stage4
SAMEA103991643	PRJEB42490	Bos taurus	Cerebellum	CNS	CNS	Nervous System	Nervous System	Unknown	Unknown	Unknown	Illumina NovaSeq 6000	602 days	2021-01-31	Holstein	Male	Male	Stage5
SAMEA103991676	PRJEB42490	Bos taurus	Cerebellum	CNS	CNS	Nervous System	Nervous System	Unknown	Unknown	Unknown	Illumina NovaSeq 6000	1250 days	2021-01-31	Holstein	Female	Female	Stage5
SAMEA103991688	PRJEB42490	Bos taurus	Testis	Testis	Testis	Male Reproductive System	Male Reproductive System	Male	Unknown	Unknown	Illumina NovaSeq 6000	602 days	2021-01-31	Holstein	Male	Male	Stage4
SAMEA104468257	PRJEB24380	Bos taurus	Jejunum Mucosa	Jejunum	Jejunum	Digestive System	Digestive System	Male	Holstein	Holstein	Illumina HiSeq 2500	Unknown	2018-03-12	Holstein	Male	Male	Unknown
SAMEA104468263	PRJEB24380	Bos taurus	Jejunum Mucosa	Jejunum	Jejunum	Digestive System	Digestive System	Male	Holstein	Holstein	Illumina HiSeq 2500	Unknown	2018-03-12	Holstein	Male	Male	Unknown
SAMEA104468264	PRJEB24380	Bos taurus	Jejunum Mucosa	Jejunum	Jejunum	Digestive System	Digestive System	Male	Holstein	Holstein	Illumina HiSeq 2500	Unknown	2018-03-12	Holstein	Male	Male	Unknown
SAMEA104468265	PRJEB24380	Bos taurus	Jejunum Mucosa	Jejunum	Jejunum	Digestive System	Digestive System	Male	Holstein	Holstein	Illumina HiSeq 2500	Unknown	2018-03-12	Holstein	Male	Male	Unknown
SAMEA104468266	PRJEB24380	Bos taurus	Jejunum Mucosa	Jejunum	Jejunum	Digestive System	Digestive System	Male	Holstein	Holstein	Illumina HiSeq 2500	Unknown	2018-03-12	Holstein	Male	Male	Unknown
SAMEA104468267	PRJEB24380	Bos taurus	Jejunum Mucosa	Jejunum	Jejunum	Digestive System	Digestive System	Male	Holstein	Holstein	Illumina HiSeq 2500	Unknown	2018-03-12	Holstein	Male	Male	Unknown
SAMEA104468268	PRJEB24380	Bos taurus	Jejunum Mucosa	Jejunum	Jejunum	Digestive System	Digestive System	Male	Holstein	Holstein	Illumina HiSeq 2500	Unknown	2018-03-12	Holstein	Male	Male	Stage4
SAMEA104468269	PRJEB24380	Bos taurus	Jejunum Mucosa	Jejunum	Jejunum	Digestive System	Digestive System	Male	Holstein	Holstein	Illumina HiSeq 2500	Unknown	2018-03-12	Holstein	Male	Male	Stage4
SAMEA104468270	PRJEB24380	Bos taurus	Jejunum Mucosa	Jejunum	Jejunum	Digestive System	Digestive System	Male	Holstein	Holstein	Illumina HiSeq 2500	Unknown	2018-03-12	Holstein	Male	Male	Stage4
SAMEA104468271	PRJEB24380	Bos taurus	Jejunum Mucosa	Jejunum	Jejunum	Digestive System	Digestive System	Male	Holstein	Holstein	Illumina HiSeq 2500	Unknown	2018-03-12	Holstein	Male	Male	Stage4
SAMEA104468272	PRJEB24380	Bos taurus	Jejunum Mucosa	Jejunum	Jejunum	Digestive System	Digestive System	Male	Holstein	Holstein	Illumina HiSeq 2500	Unknown	2018-03-12	Holstein	Male	Male	Stage4
SAMEA104468273	PRJEB24380	Bos taurus	Jejunum Mucosa	Jejunum	Jejunum	Digestive System	Digestive System	Male	Holstein	Holstein	Illumina HiSeq 2500	Unknown	2018-03-12	Holstein	Male	Male	Unknown
SAMEA104495754	PRJNA417062	Bos indicus	Testis	Testis	Testis	Male Reproductive System	Male Reproductive System	Male	Unknown	Unknown	Illumina HiSeq 2000	7	2020-11-03	Braford	Male	Male	Unknown
SAMEA104495757	PRJNA417062	Bos indicus	Liver	Liver	Liver	Liver	Liver	Unknown	Unknown	Unknown	Illumina HiSeq 2000	2	2020-11-03	Brahman	Unknown	Unknown	Unknown
SAMEA104495759	PRJNA417062	Bos indicus	Testis	Testis	Testis	Male Reproductive System	Male Reproductive System	Male	Unknown	Unknown	Illumina HiSeq 2000	7	2020-11-03	Angus	Male	Male	Stage2
SAMEA104495760	PRJNA417062	Bos indicus	Epididymis	Epididymis	Epididymis	Male Reproductive System	Male Reproductive System	Male	Unknown	Unknown	Illumina HiSeq 2000	2	2020-11-03	Brahman	Male	Male	Unknown
SAMEA104495761	PRJNA417062	Bos indicus	Epididymis	Epididymis	Epididymis	Male Reproductive System	Male Reproductive System	Male	Unknown	Unknown	Illumina HiSeq 2000	2	2020-11-03	Brahman	Male	Male	Stage5
SAMEA104495771	PRJNA417062	Bos indicus	Testis	Testis	Testis	Male Reproductive System	Male Reproductive System	Male	Unknown	Unknown	Illumina HiSeq 2000	2	2020-11-03	Brahman	Male	Male	Unknown
SAMEA104495772	PRJNA417062	Bos indicus	Liver	Liver	Liver	Liver	Liver	Unknown	Unknown	Unknown	Illumina HiSeq 2000	2	2020-11-03	Brahman	Unknown	Unknown	Unknown
SAMEA104495774	PRJNA417062	Bos indicus	Liver	Liver	Liver	Liver	Liver	Unknown	Unknown	Unknown	Illumina HiSeq 2000	2	2020-11-03	Brahman	Unknown	Unknown	Unknown
SAMEA104495782	PRJNA417062	Bos indicus	Epididymis	Epididymis	Epididymis	Male Reproductive System	Male Reproductive System	Male	Unknown	Unknown	Illumina HiSeq 2000	2	2020-11-03	Brahman	Male	Male	Stage5
SAMEA104495791	PRJNA417062	Bos indicus	Testis	Testis	Testis	Male Reproductive System	Male Reproductive System	Male	Unknown	Unknown	Illumina HiSeq 2000	2	2020-11-03	Brahman	Male	Male	Stage5
SAMEA104495797	PRJNA417062	Bos indicus	Liver	Liver	Liver	Liver	Liver	Unknown	Unknown	Unknown	Illumina HiSeq 2000	2	2020-11-03	Brahman	Unknown	Unknown	Unknown
SAMEA104495798	PRJNA417062	Bos indicus	Testis	Testis	Testis	Male Reproductive System	Male Reproductive System	Male	Unknown	Unknown	Illumina HiSeq 2000	2	2020-11-03	Brahman	Male	Male	Stage5
SAMEA104495800	PRJNA417062	Bos indicus	Liver	Liver	Liver	Liver	Liver	Unknown	Unknown	Unknown	Illumina HiSeq 2000	2	2020-11-03	Brahman	Unknown	Unknown	Unknown
SAMEA104495804	PRJNA417062	Bos indicus	Testis	Testis	Testis	Male Reproductive System	Male Reproductive System	Male	Unknown	Unknown	Illumina HiSeq 2000	7	2020-11-03	Angus	Male	Male	Unknown
SAMEA104495808	PRJNA417062	Bos indicus	Testis	Testis	Testis	Male Reproductive System	Male Reproductive System	Male	Unknown	Unknown	Illumina HiSeq 2000	2	2020-11-03	Brahman	Male	Male	Stage5
SAMEA104495810	PRJNA417062	Bos indicus	Epididymis	Epididymis	Epididymis	Male Reproductive System	Male Reproductive System	Male	Unknown	Unknown	Illumina HiSeq 2000	2	2020-11-03	Brahman	Male	Male	Stage5
SAMEA104618856	PRJNA436715	Bos indicus	liver	Liver	Liver	Liver	Liver	Female	Unknown	Unknown	Illumina HiSeq 2000	12	2018-06-20	Brahman	Female	Female	Unknown
SAMEA104618858	PRJNA436715	Bos indicus	Hypothalamus	Hypothalamus	Hypothalamus	Nervous System	Nervous System	Female	Unknown	Unknown	Illumina HiSeq 2000	12	2018-06-20	Brahman	Female	Female	Stage5
SAMEA104618860	PRJNA436715	Bos indicus	Pituitary gland	Pituitary	Pituitary	Nervous System	Nervous System	Female	Unknown	Unknown	Illumina HiSeq 2000	12	2018-06-20	Brahman	Female	Female	Stage5
SAMEA104618861	PRJNA436715	Bos indicus	Hypothalamus	Hypothalamus	Hypothalamus	Nervous System	Nervous System	Female	Unknown	Unknown	Illumina HiSeq 2000	12	2018-06-20	Brahman	Female	Female	Stage5
SAMEA104618862	PRJNA436715	Bos indicus	liver	Liver	Liver	Liver	Liver	Female	Unknown	Unknown	Illumina HiSeq 2000	12	2018-06-20	Brahman	Female	Female	Unknown
SAMEA104618866	PRJNA436715	Bos indicus	Hypothalamus	Hypothalamus	Hypothalamus	Nervous System	Nervous System	Female	Unknown	Unknown	Illumina HiSeq 2000	12	2018-06-20	Brahman	Female	Female	Stage5
SAMEA104618867	PRJNA436715	Bos indicus	liver	Liver	Liver	Liver	Liver	Female	Unknown	Unknown	Illumina HiSeq 2000	12	2019-03-27	Brahman	Female	Female	Unknown
SAMEA104618869	PRJNA436715	Bos indicus	liver	Liver	Liver	Liver	Liver	Female	Unknown	Unknown	Illumina HiSeq 2000	12	2018-06-20	Brahman	Female	Female	Unknown
SAMEA104618870	PRJNA436715	Bos indicus	Hypothalamus	Hypothalamus	Hypothalamus	Nervous System	Nervous System	Female	Unknown	Unknown	Illumina HiSeq 2000	12	2018-06-20	Brahman	Female	Female	Stage5
SAMEA104618872	PRJNA436715	Bos indicus	Pituitary gland	Pituitary	Pituitary	Nervous System	Nervous System	Female	Unknown	Unknown	Illumina HiSeq 2000	12	2018-06-20	Brahman	Female	Female	Stage5
SAMEA104618876	PRJNA436715	Bos indicus	Hypothalamus	Hypothalamus	Hypothalamus	Nervous System	Nervous System	Female	Unknown	Unknown	Illumina HiSeq 2000	12	2018-06-20	Brahman	Female	Female	Stage5
SAMEA104618877	PRJNA436715	Bos indicus	Hypothalamus	Hypothalamus	Hypothalamus	Nervous System	Nervous System	Female	Unknown	Unknown	Illumina HiSeq 2000	12	2018-06-20	Brahman	Female	Female	Stage5
SAMEA104618878	PRJNA436715	Bos indicus	liver	Liver	Liver	Liver	Liver	Female	Unknown	Unknown	Illumina HiSeq 2000	12	2018-06-20	Brahman	Female	Female	Unknown
SAMEA104618880	PRJNA436715	Bos indicus	liver	Liver	Liver	Liver	Liver	Female	Unknown	Unknown	Illumina HiSeq 2000	12	2018-06-20	Brahman	Female	Female	Unknown
SAMEA104618881	PRJNA436715	Bos indicus	Hypothalamus	Hypothalamus	Hypothalamus	Nervous System	Nervous System	Female	Unknown	Unknown	Illumina HiSeq 2000	12	2018-06-20	Brahman	Female	Female	Stage5
SAMEA104618883	PRJNA436715	Bos indicus	Hypothalamus	Hypothalamus	Hypothalamus	Nervous System	Nervous System	Female	Unknown	Unknown	Illumina HiSeq 2000	12	2018-06-20	Brahman	Female	Female	Stage5
SAMEA104618884	PRJNA436715	Bos indicus	Hypothalamus	Hypothalamus	Hypothalamus	Nervous System	Nervous System	Female	Unknown	Unknown	Illumina HiSeq 2000	12	2018-06-20	Brahman	Female	Female	Stage5
SAMEA104618887	PRJNA436715	Bos indicus	liver	Liver	Liver	Liver	Liver	Female	Unknown	Unknown	Illumina HiSeq 2000	12	2018-06-20	Brahman	Female	Female	Stage3
SAMEA104618889	PRJNA436715	Bos indicus	liver	Liver	Liver	Liver	Liver	Female	Unknown	Unknown	Illumina HiSeq 2000	12	2018-06-20	Brahman	Female	Female	Stage4
SAMEA104618892	PRJNA436715	Bos indicus	Hypothalamus	Hypothalamus	Hypothalamus	Nervous System	Nervous System	Female	Unknown	Unknown	Illumina HiSeq 2000	12	2018-06-20	Brahman	Female	Female	Stage5
SAMEA104618893	PRJNA436715	Bos indicus	liver	Liver	Liver	Liver	Liver	Female	Unknown	Unknown	Illumina HiSeq 2000	12	2018-06-20	Brahman	Female	Female	Unknown
SAMEA104618894	PRJNA436715	Bos indicus	Uterus	Uterus	Uterus	Female Reproductive System	Female Reproductive System	Female	Unknown	Unknown	Illumina HiSeq 2000	12	2018-06-20	Brahman	Female	Female	Stage5
SAMEA104618896	PRJNA436715	Bos indicus	liver	Liver	Liver	Liver	Liver	Female	Unknown	Unknown	Illumina HiSeq 2000	12	2018-06-20	Brahman	Female	Female	Unknown
SAMEA104618898	PRJNA436715	Bos indicus	Hypothalamus	Hypothalamus	Hypothalamus	Nervous System	Nervous System	Female	Unknown	Unknown	Illumina HiSeq 2000	12	2018-06-20	Brahman	Female	Female	Stage5
SAMEA104618900	PRJNA436715	Bos indicus	liver	Liver	Liver	Liver	Liver	Female	Unknown	Unknown	Illumina HiSeq 2000	12	2018-06-20	Brahman	Female	Female	Stage3
SAMEA104618901	PRJNA436715	Bos indicus	Uterus	Uterus	Uterus	Female Reproductive System	Female Reproductive System	Female	Unknown	Unknown	Illumina HiSeq 2000	12	2018-06-20	Brahman	Female	Female	Stage5
SAMEA104618906	PRJNA436715	Bos indicus	liver	Liver	Liver	Liver	Liver	Female	Unknown	Unknown	Illumina HiSeq 2000	12	2018-06-20	Brahman	Female	Female	Unknown
SAMEA104618907	PRJNA436715	Bos indicus	Uterus	Uterus	Uterus	Female Reproductive System	Female Reproductive System	Female	Unknown	Unknown	Illumina HiSeq 2000	12	2018-06-20	Brahman	Female	Female	Stage5
SAMEA104618910	PRJNA436715	Bos indicus	Pituitary gland	Pituitary	Pituitary	Nervous System	Nervous System	Female	Unknown	Unknown	Illumina HiSeq 2000	12	2018-06-20	Brahman	Female	Female	Stage5
SAMEA104618911	PRJNA436715	Bos indicus	Pituitary gland	Pituitary	Pituitary	Nervous System	Nervous System	Female	Unknown	Unknown	Illumina HiSeq 2000	12	2018-06-20	Brahman	Female	Female	Unknown
SAMEA104618913	PRJNA436715	Bos indicus	Pituitary gland	Pituitary	Pituitary	Nervous System	Nervous System	Female	Unknown	Unknown	Illumina HiSeq 2000	12	2018-06-20	Brahman	Female	Female	Unknown
SAMEA104618915	PRJNA436715	Bos indicus	Uterus	Uterus	Uterus	Female Reproductive System	Female Reproductive System	Female	Unknown	Unknown	Illumina HiSeq 2000	12	2018-06-20	Brahman	Female	Female	Stage5
SAMEA104618916	PRJNA436715	Bos indicus	Pituitary gland	Pituitary	Pituitary	Nervous System	Nervous System	Female	Unknown	Unknown	Illumina HiSeq 2000	12	2018-06-20	Brahman	Female	Female	Stage5
SAMEA104618918	PRJNA436715	Bos indicus	Pituitary gland	Pituitary	Pituitary	Nervous System	Nervous System	Female	Unknown	Unknown	Illumina HiSeq 2000	12	2018-06-20	Brahman	Female	Female	Unknown
SAMEA104618919	PRJNA436715	Bos indicus	Uterus	Uterus	Uterus	Female Reproductive System	Female Reproductive System	Female	Unknown	Unknown	Illumina HiSeq 2000	12	2018-06-20	Brahman	Female	Female	Stage5
SAMEA104618921	PRJNA436715	Bos indicus	Uterus	Uterus	Uterus	Female Reproductive System	Female Reproductive System	Female	Unknown	Unknown	Illumina HiSeq 2000	12	2018-06-20	Brahman	Female	Female	Unknown
SAMEA104618923	PRJNA436715	Bos indicus	Uterus	Uterus	Uterus	Female Reproductive System	Female Reproductive System	Female	Unknown	Unknown	Illumina HiSeq 2000	12	2018-06-20	Brahman	Female	Female	Stage5
SAMEA104618932	PRJNA436715	Bos indicus	Uterus	Uterus	Uterus	Female Reproductive System	Female Reproductive System	Female	Unknown	Unknown	Illumina HiSeq 2000	12	2018-06-20	Brahman	Female	Female	Stage5
SAMEA104618935	PRJNA436715	Bos indicus	Pituitary gland	Pituitary	Pituitary	Nervous System	Nervous System	Female	Unknown	Unknown	Illumina HiSeq 2000	12	2018-06-20	Brahman	Female	Female	Stage5
SAMEA104618936	PRJNA436715	Bos indicus	Uterus	Uterus	Uterus	Female Reproductive System	Female Reproductive System	Female	Unknown	Unknown	Illumina HiSeq 2000	12	2018-06-20	Brahman	Female	Female	Stage5
SAMEA104618939	PRJNA436715	Bos indicus	Uterus	Uterus	Uterus	Female Reproductive System	Female Reproductive System	Female	Unknown	Unknown	Illumina HiSeq 2000	12	2018-06-20	Brahman	Female	Female	Stage5
SAMEA104618940	PRJNA436715	Bos indicus	Pituitary gland	Pituitary	Pituitary	Nervous System	Nervous System	Female	Unknown	Unknown	Illumina HiSeq 2000	12	2018-06-20	Brahman	Female	Female	Stage5
SAMEA104618946	PRJNA436715	Bos indicus	Pituitary gland	Pituitary	Pituitary	Nervous System	Nervous System	Female	Unknown	Unknown	Illumina HiSeq 2000	12	2018-06-20	Brahman	Female	Female	Stage5
SAMEA104618947	PRJNA436715	Bos indicus	Uterus	Uterus	Uterus	Female Reproductive System	Female Reproductive System	Female	Unknown	Unknown	Illumina HiSeq 2000	12	2018-06-20	Brahman	Female	Female	Unknown
SAMEA104618950	PRJNA436715	Bos indicus	Pituitary gland	Pituitary	Pituitary	Nervous System	Nervous System	Female	Unknown	Unknown	Illumina HiSeq 2000	12	2018-06-20	Brahman	Female	Female	Stage5
SAMEA104618956	PRJNA436715	Bos indicus	Pituitary gland	Pituitary	Pituitary	Nervous System	Nervous System	Female	Unknown	Unknown	Illumina HiSeq 2000	12	2018-06-20	Brahman	Female	Female	Stage5
SAMEA104618958	PRJNA436715	Bos indicus	Uterus	Uterus	Uterus	Female Reproductive System	Female Reproductive System	Female	Unknown	Unknown	Illumina HiSeq 2000	12	2018-06-20	Brahman	Female	Female	Stage5
SAMEA104626818	PRJEB24166	Bos taurus	Blood	Blood	Blood	Immune System	Immune System	Unknown	Unknown	Unknown	Illumina HiSeq 3000	2 years	2018-01-04	Holstein	Female	Female	Stage5
SAMEA104626826	PRJEB24166	Bos taurus	Blood	Blood	Blood	Immune System	Immune System	Unknown	Unknown	Unknown	Illumina HiSeq 3000	2 years	2018-01-04	Holstein	Female	Female	Stage5
SAMEA104626832	PRJEB24166	Bos taurus	Blood	Blood	Blood	Immune System	Immune System	Unknown	Unknown	Unknown	Illumina HiSeq 3000	2 years	2018-01-04	Holstein	Female	Female	Stage5
SAMEA104626839	PRJEB24166	Bos taurus	Blood	Blood	Blood	Immune System	Immune System	Unknown	Unknown	Unknown	Illumina HiSeq 3000	2 years	2018-01-04	Swedish Red	Female	Female	Stage5
SAMEA104626845	PRJEB24166	Bos taurus	Blood	Blood	Blood	Immune System	Immune System	Unknown	Unknown	Unknown	Illumina HiSeq 3000	2 years	2018-01-04	Holstein	Female	Female	Stage5
SAMEA104626846	PRJEB24166	Bos taurus	Blood	Blood	Blood	Immune System	Immune System	Unknown	Unknown	Unknown	Illumina HiSeq 3000	2 years	2018-01-04	Holstein	Female	Female	Stage5
SAMEA104626852	PRJEB24166	Bos taurus	Blood	Blood	Blood	Immune System	Immune System	Unknown	Unknown	Unknown	Illumina HiSeq 3000	2 years	2018-01-04	Holstein	Female	Female	Stage5
SAMEA104626869	PRJEB24166	Bos taurus	Blood	Blood	Blood	Immune System	Immune System	Unknown	Unknown	Unknown	Illumina HiSeq 3000	2 years	2018-01-04	Holstein	Female	Female	Stage5
SAMEA104626874	PRJEB24166	Bos taurus	Blood	Blood	Blood	Immune System	Immune System	Unknown	Unknown	Unknown	Illumina HiSeq 3000	2 years	2018-01-04	Holstein	Female	Female	Stage5
SAMEA104626879	PRJEB24166	Bos taurus	Blood	Blood	Blood	Immune System	Immune System	Unknown	Unknown	Unknown	Illumina HiSeq 3000	2 years	2018-01-04	Holstein	Female	Female	Stage5
SAMEA104626889	PRJEB24166	Bos taurus	Blood	Blood	Blood	Immune System	Immune System	Unknown	Unknown	Unknown	Illumina HiSeq 3000	2 years	2018-01-04	Holstein	Female	Female	Stage5
SAMEA104626895	PRJEB24166	Bos taurus	Blood	Blood	Blood	Immune System	Immune System	Unknown	Unknown	Unknown	Illumina HiSeq 3000	2 years	2018-01-04	Holstein	Female	Female	Stage5
SAMEA110329006	PRJEB54651	Bos taurus	Respiratory Epithelial Cell	Lung	Lung	Respiratory System	Respiratory System	Unknown	Unknown	Unknown	Illumina HiSeq 4000	Unknown	2022-07-14	Holstein	Female	Female	Unknown
SAMEA110329017	PRJEB54651	Bos taurus	Respiratory Epithelial Cell	Lung	Lung	Respiratory System	Respiratory System	Unknown	Unknown	Unknown	Illumina HiSeq 4000	Unknown	2022-07-14	Simmental	Female	Female	Stage3
SAMEA110329059	PRJEB54651	Bos taurus	Respiratory Epithelial Cell	Lung	Lung	Respiratory System	Respiratory System	Unknown	Unknown	Unknown	Illumina HiSeq 4000	Unknown	2022-07-14	Holstein	Female	Female	Stage3
SAMEA111328912	PRJEB46995	Bos taurus	Testis	Testis	Testis	Male Reproductive System	Male Reproductive System	Male	Unknown	Unknown	Illumina NovaSeq 6000	Unknown	2022-09-15	Brown Swiss	Male	Male	Unknown
SAMEA111328913	PRJEB46995	Bos taurus	Testis	Testis	Testis	Male Reproductive System	Male Reproductive System	Male	Unknown	Unknown	Illumina NovaSeq 6000	Unknown	2022-09-15	Brown Swiss	Male	Male	Unknown
SAMEA111328914	PRJEB46995	Bos taurus	Testis	Testis	Testis	Male Reproductive System	Male Reproductive System	Male	Unknown	Unknown	Illumina NovaSeq 6000	Unknown	2022-09-15	Brown Swiss	Male	Male	Unknown
SAMEA111328915	PRJEB46995	Bos taurus	Testis	Testis	Testis	Male Reproductive System	Male Reproductive System	Male	Unknown	Unknown	Illumina NovaSeq 6000	Unknown	2022-09-15	Original_Braunvieh	Male	Male	Unknown
SAMEA111328916	PRJEB46995	Bos taurus	Testis	Testis	Testis	Male Reproductive System	Male Reproductive System	Male	Unknown	Unknown	Illumina NovaSeq 6000	Unknown	2022-09-15	Original_Braunvieh	Male	Male	Unknown
SAMEA111328917	PRJEB46995	Bos taurus	Testis	Testis	Testis	Male Reproductive System	Male Reproductive System	Male	Unknown	Unknown	Illumina NovaSeq 6000	Unknown	2022-09-15	Brown Swiss	Male	Male	Unknown
SAMEA111328918	PRJEB46995	Bos taurus	Testis	Testis	Testis	Male Reproductive System	Male Reproductive System	Male	Unknown	Unknown	Illumina NovaSeq 6000	Unknown	2022-09-15	Original_Braunvieh	Male	Male	Unknown
SAMEA111328919	PRJEB46995	Bos taurus	Testis	Testis	Testis	Male Reproductive System	Male Reproductive System	Male	Unknown	Unknown	Illumina NovaSeq 6000	Unknown	2022-09-15	Brown Swiss	Male	Male	Unknown
SAMEA111328920	PRJEB46995	Bos taurus	Testis	Testis	Testis	Male Reproductive System	Male Reproductive System	Male	Unknown	Unknown	Illumina NovaSeq 6000	Unknown	2022-09-15	Original_Braunvieh	Male	Male	Unknown
SAMEA111328921	PRJEB46995	Bos taurus	Testis	Testis	Testis	Male Reproductive System	Male Reproductive System	Male	Unknown	Unknown	Illumina NovaSeq 6000	Unknown	2022-09-15	Original_Braunvieh	Male	Male	Unknown
SAMEA111328922	PRJEB46995	Bos taurus	Testis	Testis	Testis	Male Reproductive System	Male Reproductive System	Male	Unknown	Unknown	Illumina NovaSeq 6000	Unknown	2022-09-15	Original_Braunvieh	Male	Male	Unknown
SAMEA111328923	PRJEB46995	Bos taurus	Testis	Testis	Testis	Male Reproductive System	Male Reproductive System	Male	Unknown	Unknown	Illumina NovaSeq 6000	Unknown	2022-09-15	Brown Swiss	Male	Male	Unknown
SAMEA111328924	PRJEB46995	Bos taurus	Testis	Testis	Testis	Male Reproductive System	Male Reproductive System	Male	Unknown	Unknown	Illumina NovaSeq 6000	Unknown	2022-09-15	Brown Swiss	Male	Male	Unknown
SAMEA111328925	PRJEB46995	Bos taurus	Testis	Testis	Testis	Male Reproductive System	Male Reproductive System	Male	Unknown	Unknown	Illumina NovaSeq 6000	Unknown	2022-09-15	Original_Braunvieh	Male	Male	Unknown
SAMEA111328926	PRJEB46995	Bos taurus	Testis	Testis	Testis	Male Reproductive System	Male Reproductive System	Male	Unknown	Unknown	Illumina NovaSeq 6000	Unknown	2022-09-15	Brown Swiss	Male	Male	Unknown
SAMEA111328927	PRJEB46995	Bos taurus	Testis	Testis	Testis	Male Reproductive System	Male Reproductive System	Male	Unknown	Unknown	Illumina NovaSeq 6000	Unknown	2022-09-15	Original_Braunvieh	Male	Male	Unknown
SAMEA111328928	PRJEB46995	Bos taurus	Testis	Testis	Testis	Male Reproductive System	Male Reproductive System	Male	Unknown	Unknown	Illumina NovaSeq 6000	Unknown	2022-09-15	Original_Braunvieh	Male	Male	Unknown
SAMEA111328929	PRJEB46995	Bos taurus	Testis	Testis	Testis	Male Reproductive System	Male Reproductive System	Male	Unknown	Unknown	Illumina NovaSeq 6000	Unknown	2022-09-15	Original_Braunvieh	Male	Male	Unknown
SAMEA111328930	PRJEB46995	Bos taurus	Testis	Testis	Testis	Male Reproductive System	Male Reproductive System	Male	Unknown	Unknown	Illumina NovaSeq 6000	Unknown	2022-09-15	Brown Swiss	Male	Male	Unknown
SAMEA111328931	PRJEB46995	Bos taurus	Testis	Testis	Testis	Male Reproductive System	Male Reproductive System	Male	Unknown	Unknown	Illumina NovaSeq 6000	Unknown	2022-09-15	Original_Braunvieh	Male	Male	Unknown
SAMEA111328932	PRJEB46995	Bos taurus	Testis	Testis	Testis	Male Reproductive System	Male Reproductive System	Male	Unknown	Unknown	Illumina NovaSeq 6000	Unknown	2022-09-15	Original_Braunvieh	Male	Male	Unknown
SAMEA111328933	PRJEB46995	Bos taurus	Testis	Testis	Testis	Male Reproductive System	Male Reproductive System	Male	Unknown	Unknown	Illumina NovaSeq 6000	Unknown	2022-09-15	Brown Swiss	Male	Male	Unknown
SAMEA111328934	PRJEB46995	Bos taurus	Testis	Testis	Testis	Male Reproductive System	Male Reproductive System	Male	Unknown	Unknown	Illumina NovaSeq 6000	Unknown	2022-09-15	Brown Swiss	Male	Male	Unknown
SAMEA111328935	PRJEB46995	Bos taurus	Testis	Testis	Testis	Male Reproductive System	Male Reproductive System	Male	Unknown	Unknown	Illumina NovaSeq 6000	Unknown	2022-09-15	Brown Swiss	Male	Male	Stage5
SAMEA111328936	PRJEB46995	Bos taurus	Testis	Testis	Testis	Male Reproductive System	Male Reproductive System	Male	Unknown	Unknown	Illumina NovaSeq 6000	Unknown	2022-09-15	Brown Swiss	Male	Male	Unknown
SAMEA111328937	PRJEB46995	Bos taurus	Testis	Testis	Testis	Male Reproductive System	Male Reproductive System	Male	Unknown	Unknown	Illumina NovaSeq 6000	Unknown	2022-09-15	Brown Swiss	Male	Male	Unknown
SAMEA111328938	PRJEB46995	Bos taurus	Testis	Testis	Testis	Male Reproductive System	Male Reproductive System	Male	Unknown	Unknown	Illumina NovaSeq 6000	Unknown	2022-09-15	Original_Braunvieh	Male	Male	Unknown
SAMEA111328939	PRJEB46995	Bos taurus	Testis	Testis	Testis	Male Reproductive System	Male Reproductive System	Male	Unknown	Unknown	Illumina NovaSeq 6000	Unknown	2022-09-15	Brown Swiss	Male	Male	Unknown
SAMEA111328940	PRJEB46995	Bos taurus	Testis	Testis	Testis	Male Reproductive System	Male Reproductive System	Male	Unknown	Unknown	Illumina NovaSeq 6000	Unknown	2022-09-15	Brown Swiss	Male	Male	Unknown
SAMEA111328941	PRJEB46995	Bos taurus	Testis	Testis	Testis	Male Reproductive System	Male Reproductive System	Male	Unknown	Unknown	Illumina NovaSeq 6000	Unknown	2022-09-15	Original_Braunvieh	Male	Male	Unknown
SAMEA111328942	PRJEB46995	Bos taurus	Testis	Testis	Testis	Male Reproductive System	Male Reproductive System	Male	Unknown	Unknown	Illumina NovaSeq 6000	Unknown	2022-09-15	Original_Braunvieh	Male	Male	Unknown
SAMEA111328943	PRJEB46995	Bos taurus	Testis	Testis	Testis	Male Reproductive System	Male Reproductive System	Male	Unknown	Unknown	Illumina NovaSeq 6000	Unknown	2022-09-15	Original_Braunvieh	Male	Male	Unknown
SAMEA112366767	PRJEB59267	Bos taurus	Cerebellum	CNS	CNS	Nervous System	Nervous System	Female	Parthenaise	Parthenaise	Illumina NovaSeq 6000	Unknown	2023-02-07	Parthenaise	Female	Female	Stage5
SAMEA112366770	PRJEB59267	Bos taurus	Brain	CNS	CNS	Nervous System	Nervous System	Female	Parthenaise	Parthenaise	Illumina NovaSeq 6000	Unknown	2023-02-07	Parthenaise	Female	Female	Stage5
SAMEA112366772	PRJEB59267	Bos taurus	Brain	CNS	CNS	Nervous System	Nervous System	Female	Parthenaise	Parthenaise	Illumina NovaSeq 6000	Unknown	2023-02-07	Parthenaise	Female	Female	Stage5
SAMEA112366773	PRJEB59267	Bos taurus	Cerebellum	CNS	CNS	Nervous System	Nervous System	Female	Parthenaise	Parthenaise	Illumina NovaSeq 6000	Unknown	2023-02-07	Parthenaise	Female	Female	Stage5
SAMEA112366775	PRJEB59267	Bos taurus	Cerebellum	CNS	CNS	Nervous System	Nervous System	Female	Parthenaise	Parthenaise	Illumina NovaSeq 6000	Unknown	2023-02-07	Parthenaise	Female	Female	Stage5
SAMEA112366778	PRJEB59267	Bos taurus	Brain	CNS	CNS	Nervous System	Nervous System	Female	Parthenaise	Parthenaise	Illumina NovaSeq 6000	Unknown	2023-02-07	Parthenaise	Female	Female	Stage5
SAMEA112843208	PRJEB60952	Bos taurus	Testis	Testis	Testis	Male Reproductive System	Male Reproductive System	Male	Unknown	Unknown	Illumina NovaSeq 6000	Unknown	2023-03-31	Holstein	Male	Male	Unknown
SAMEA113601195	PRJEB46995	Bos taurus	Epididymis	Epididymis	Epididymis	Male Reproductive System	Male Reproductive System	Male	Unknown	Unknown	Illumina NovaSeq 6000	Unknown	2023-06-22	Brown Swiss	Male	Male	Unknown
SAMEA113601196	PRJEB46995	Bos taurus	Epididymis	Epididymis	Epididymis	Male Reproductive System	Male Reproductive System	Male	Unknown	Unknown	Illumina NovaSeq 6000	Unknown	2023-06-22	Brown Swiss	Male	Male	Unknown
SAMEA113601197	PRJEB46995	Bos taurus	Epididymis	Epididymis	Epididymis	Male Reproductive System	Male Reproductive System	Male	Unknown	Unknown	Illumina NovaSeq 6000	Unknown	2023-06-22	Brown Swiss	Male	Male	Unknown
SAMEA113601198	PRJEB46995	Bos taurus	Epididymis	Epididymis	Epididymis	Male Reproductive System	Male Reproductive System	Male	Unknown	Unknown	Illumina NovaSeq 6000	Unknown	2023-06-22	Original_Braunvieh	Male	Male	Unknown
SAMEA113601199	PRJEB46995	Bos taurus	Epididymis	Epididymis	Epididymis	Male Reproductive System	Male Reproductive System	Male	Unknown	Unknown	Illumina NovaSeq 6000	Unknown	2023-06-22	Brown Swiss	Male	Male	Unknown
SAMEA113601200	PRJEB46995	Bos taurus	Epididymis	Epididymis	Epididymis	Male Reproductive System	Male Reproductive System	Male	Unknown	Unknown	Illumina NovaSeq 6000	Unknown	2023-06-22	Brown Swiss	Male	Male	Unknown
SAMEA113601201	PRJEB46995	Bos taurus	Epididymis	Epididymis	Epididymis	Male Reproductive System	Male Reproductive System	Male	Unknown	Unknown	Illumina NovaSeq 6000	Unknown	2023-06-22	Original_Braunvieh	Male	Male	Unknown
SAMEA113601202	PRJEB46995	Bos taurus	Epididymis	Epididymis	Epididymis	Male Reproductive System	Male Reproductive System	Male	Unknown	Unknown	Illumina NovaSeq 6000	Unknown	2023-06-22	Brown Swiss	Male	Male	Unknown
SAMEA113601203	PRJEB46995	Bos taurus	Epididymis	Epididymis	Epididymis	Male Reproductive System	Male Reproductive System	Male	Unknown	Unknown	Illumina NovaSeq 6000	Unknown	2023-06-22	Original_Braunvieh	Male	Male	Unknown
SAMEA113601204	PRJEB46995	Bos taurus	Epididymis	Epididymis	Epididymis	Male Reproductive System	Male Reproductive System	Male	Unknown	Unknown	Illumina NovaSeq 6000	Unknown	2023-06-22	Original_Braunvieh	Male	Male	Unknown
SAMEA113601205	PRJEB46995	Bos taurus	Epididymis	Epididymis	Epididymis	Male Reproductive System	Male Reproductive System	Male	Unknown	Unknown	Illumina NovaSeq 6000	Unknown	2023-06-22	Original_Braunvieh	Male	Male	Unknown
SAMEA113601206	PRJEB46995	Bos taurus	Epididymis	Epididymis	Epididymis	Male Reproductive System	Male Reproductive System	Male	Unknown	Unknown	Illumina NovaSeq 6000	Unknown	2023-06-22	Original_Braunvieh	Male	Male	Unknown
SAMEA113601207	PRJEB46995	Bos taurus	Epididymis	Epididymis	Epididymis	Male Reproductive System	Male Reproductive System	Male	Unknown	Unknown	Illumina NovaSeq 6000	Unknown	2023-06-22	Brown Swiss	Male	Male	Unknown
SAMEA113601208	PRJEB46995	Bos taurus	Epididymis	Epididymis	Epididymis	Male Reproductive System	Male Reproductive System	Male	Unknown	Unknown	Illumina NovaSeq 6000	Unknown	2023-06-22	Brown Swiss	Male	Male	Unknown
SAMEA113601209	PRJEB46995	Bos taurus	Epididymis	Epididymis	Epididymis	Male Reproductive System	Male Reproductive System	Male	Unknown	Unknown	Illumina NovaSeq 6000	Unknown	2023-06-22	Brown Swiss	Male	Male	Unknown
SAMEA113601210	PRJEB46995	Bos taurus	Epididymis	Epididymis	Epididymis	Male Reproductive System	Male Reproductive System	Male	Unknown	Unknown	Illumina NovaSeq 6000	Unknown	2023-06-22	Original_Braunvieh	Male	Male	Unknown
SAMEA113601211	PRJEB46995	Bos taurus	Epididymis	Epididymis	Epididymis	Male Reproductive System	Male Reproductive System	Male	Unknown	Unknown	Illumina NovaSeq 6000	Unknown	2023-06-22	Limousin	Male	Male	Unknown
SAMEA113601212	PRJEB46995	Bos taurus	Epididymis	Epididymis	Epididymis	Male Reproductive System	Male Reproductive System	Male	Unknown	Unknown	Illumina NovaSeq 6000	Unknown	2023-06-22	Original_Braunvieh	Male	Male	Unknown
SAMEA113601213	PRJEB46995	Bos taurus	Epididymis	Epididymis	Epididymis	Male Reproductive System	Male Reproductive System	Male	Unknown	Unknown	Illumina NovaSeq 6000	Unknown	2023-06-22	Brown Swiss	Male	Male	Unknown
SAMEA113601214	PRJEB46995	Bos taurus	Epididymis	Epididymis	Epididymis	Male Reproductive System	Male Reproductive System	Male	Unknown	Unknown	Illumina NovaSeq 6000	Unknown	2023-06-11	Brown Swiss	Male	Male	Unknown
SAMEA113601215	PRJEB46995	Bos taurus	Epididymis	Epididymis	Epididymis	Male Reproductive System	Male Reproductive System	Male	Unknown	Unknown	Illumina NovaSeq 6000	Unknown	2023-06-22	Brown Swiss	Male	Male	Unknown
SAMEA113601216	PRJEB46995	Bos taurus	Epididymis	Epididymis	Epididymis	Male Reproductive System	Male Reproductive System	Male	Unknown	Unknown	Illumina NovaSeq 6000	Unknown	2023-06-22	Brown Swiss	Male	Male	Unknown
SAMEA113601217	PRJEB46995	Bos taurus	Epididymis	Epididymis	Epididymis	Male Reproductive System	Male Reproductive System	Male	Unknown	Unknown	Illumina NovaSeq 6000	Unknown	2023-06-22	Brown Swiss	Male	Male	Unknown
SAMEA113601218	PRJEB46995	Bos taurus	Epididymis	Epididymis	Epididymis	Male Reproductive System	Male Reproductive System	Male	Unknown	Unknown	Illumina NovaSeq 6000	Unknown	2023-06-22	Brown Swiss	Male	Male	Unknown
SAMEA113601219	PRJEB46995	Bos taurus	Epididymis	Epididymis	Epididymis	Male Reproductive System	Male Reproductive System	Male	Unknown	Unknown	Illumina NovaSeq 6000	Unknown	2023-06-22	Holstein	Male	Male	Unknown
SAMEA113601221	PRJEB46995	Bos taurus	Epididymis	Epididymis	Epididymis	Male Reproductive System	Male Reproductive System	Male	Unknown	Unknown	Illumina NovaSeq 6000	Unknown	2023-06-22	Brown Swiss	Male	Male	Unknown
SAMEA113601222	PRJEB46995	Bos taurus	Epididymis	Epididymis	Epididymis	Male Reproductive System	Male Reproductive System	Male	Unknown	Unknown	Illumina NovaSeq 6000	Unknown	2023-06-22	Brown Swiss	Male	Male	Unknown
SAMEA113601223	PRJEB46995	Bos taurus	Epididymis	Epididymis	Epididymis	Male Reproductive System	Male Reproductive System	Male	Unknown	Unknown	Illumina NovaSeq 6000	Unknown	2023-06-22	Brown Swiss	Male	Male	Unknown
SAMEA113601224	PRJEB46995	Bos taurus	Epididymis	Epididymis	Epididymis	Male Reproductive System	Male Reproductive System	Male	Unknown	Unknown	Illumina NovaSeq 6000	Unknown	2023-06-22	Brown Swiss	Male	Male	Stage5
SAMEA113601225	PRJEB46995	Bos taurus	Epididymis	Epididymis	Epididymis	Male Reproductive System	Male Reproductive System	Male	Unknown	Unknown	Illumina NovaSeq 6000	Unknown	2023-06-22	Original_Braunvieh	Male	Male	Stage5
SAMEA113601226	PRJEB46995	Bos taurus	Epididymis	Epididymis	Epididymis	Male Reproductive System	Male Reproductive System	Male	Unknown	Unknown	Illumina NovaSeq 6000	Unknown	2023-06-22	Original_Braunvieh	Male	Male	Unknown
SAMEA113601227	PRJEB46995	Bos taurus	Epididymis	Epididymis	Epididymis	Male Reproductive System	Male Reproductive System	Male	Unknown	Unknown	Illumina NovaSeq 6000	Unknown	2023-06-22	Brown Swiss	Male	Male	Unknown
SAMEA113601228	PRJEB46995	Bos taurus	Epididymis	Epididymis	Epididymis	Male Reproductive System	Male Reproductive System	Male	Unknown	Unknown	Illumina NovaSeq 6000	Unknown	2023-06-22	Brown Swiss	Male	Male	Unknown
SAMEA113601229	PRJEB46995	Bos taurus	Epididymis	Epididymis	Epididymis	Male Reproductive System	Male Reproductive System	Male	Unknown	Unknown	Illumina NovaSeq 6000	Unknown	2023-06-22	Original_Braunvieh	Male	Male	Unknown
SAMEA113601230	PRJEB46995	Bos taurus	Epididymis	Epididymis	Epididymis	Male Reproductive System	Male Reproductive System	Male	Unknown	Unknown	Illumina NovaSeq 6000	Unknown	2023-06-22	Original_Braunvieh	Male	Male	Unknown
SAMEA113601231	PRJEB46995	Bos taurus	Epididymis	Epididymis	Epididymis	Male Reproductive System	Male Reproductive System	Male	Unknown	Unknown	Illumina NovaSeq 6000	Unknown	2023-06-22	Brown Swiss	Male	Male	Unknown
SAMEA113601233	PRJEB46995	Bos taurus	Epididymis	Epididymis	Epididymis	Male Reproductive System	Male Reproductive System	Male	Unknown	Unknown	Illumina NovaSeq 6000	Unknown	2023-06-22	Brown Swiss	Male	Male	Unknown
SAMEA113601234	PRJEB46995	Bos taurus	Epididymis	Epididymis	Epididymis	Male Reproductive System	Male Reproductive System	Male	Unknown	Unknown	Illumina NovaSeq 6000	Unknown	2023-06-22	Brown Swiss	Male	Male	Unknown
SAMEA113601235	PRJEB46995	Bos taurus	Epididymis	Epididymis	Epididymis	Male Reproductive System	Male Reproductive System	Male	Unknown	Unknown	Illumina NovaSeq 6000	Unknown	2023-06-22	Brown Swiss	Male	Male	Unknown
SAMEA113601236	PRJEB46995	Bos taurus	Epididymis	Epididymis	Epididymis	Male Reproductive System	Male Reproductive System	Male	Unknown	Unknown	Illumina NovaSeq 6000	Unknown	2023-06-22	Brown Swiss	Male	Male	Unknown
SAMEA113601237	PRJEB46995	Bos taurus	Epididymis	Epididymis	Epididymis	Male Reproductive System	Male Reproductive System	Male	Unknown	Unknown	Illumina NovaSeq 6000	Unknown	2023-06-22	Brown Swiss	Male	Male	Unknown
SAMEA113601238	PRJEB46995	Bos taurus	Epididymis	Epididymis	Epididymis	Male Reproductive System	Male Reproductive System	Male	Unknown	Unknown	Illumina NovaSeq 6000	Unknown	2023-06-22	Brown Swiss	Male	Male	Unknown
SAMEA113601240	PRJEB46995	Bos taurus	Epididymis	Epididymis	Epididymis	Male Reproductive System	Male Reproductive System	Male	Unknown	Unknown	Illumina NovaSeq 6000	Unknown	2023-06-22	Brown Swiss	Male	Male	Unknown
SAMEA113601241	PRJEB46995	Bos taurus	Epididymis	Epididymis	Epididymis	Male Reproductive System	Male Reproductive System	Male	Unknown	Unknown	Illumina NovaSeq 6000	Unknown	2023-06-22	Original_Braunvieh	Male	Male	Unknown
SAMEA113601242	PRJEB46995	Bos taurus	Epididymis	Epididymis	Epididymis	Male Reproductive System	Male Reproductive System	Male	Unknown	Unknown	Illumina NovaSeq 6000	Unknown	2023-06-22	Holstein	Male	Male	Unknown
SAMEA113601243	PRJEB46995	Bos taurus	Epididymis	Epididymis	Epididymis	Male Reproductive System	Male Reproductive System	Male	Unknown	Unknown	Illumina NovaSeq 6000	Unknown	2023-06-22	Brown Swiss	Male	Male	Unknown
SAMEA113601244	PRJEB46995	Bos taurus	Epididymis	Epididymis	Epididymis	Male Reproductive System	Male Reproductive System	Male	Unknown	Unknown	Illumina NovaSeq 6000	Unknown	2023-06-22	Brown Swiss	Male	Male	Unknown
SAMEA113601246	PRJEB46995	Bos taurus	Epididymis	Epididymis	Epididymis	Male Reproductive System	Male Reproductive System	Male	Unknown	Unknown	Illumina NovaSeq 6000	Unknown	2023-06-22	Original_Braunvieh	Male	Male	Unknown
SAMEA113601247	PRJEB46995	Bos taurus	Epididymis	Epididymis	Epididymis	Male Reproductive System	Male Reproductive System	Male	Unknown	Unknown	Illumina NovaSeq 6000	Unknown	2023-06-22	Limousin	Male	Male	Unknown
SAMEA113601248	PRJEB46995	Bos taurus	Epididymis	Epididymis	Epididymis	Male Reproductive System	Male Reproductive System	Male	Unknown	Unknown	Illumina NovaSeq 6000	Unknown	2023-06-22	Brown Swiss	Male	Male	Unknown
SAMEA113601249	PRJEB46995	Bos taurus	Epididymis	Epididymis	Epididymis	Male Reproductive System	Male Reproductive System	Male	Unknown	Unknown	Illumina NovaSeq 6000	Unknown	2023-06-22	Brown Swiss	Male	Male	Unknown
SAMEA113601250	PRJEB46995	Bos taurus	Epididymis	Epididymis	Epididymis	Male Reproductive System	Male Reproductive System	Male	Unknown	Unknown	Illumina NovaSeq 6000	Unknown	2023-06-22	Brown Swiss	Male	Male	Unknown
SAMEA113601251	PRJEB46995	Bos taurus	Epididymis	Epididymis	Epididymis	Male Reproductive System	Male Reproductive System	Male	Unknown	Unknown	Illumina NovaSeq 6000	Unknown	2023-06-22	Brown Swiss	Male	Male	Unknown
SAMEA113601252	PRJEB46995	Bos taurus	Epididymis	Epididymis	Epididymis	Male Reproductive System	Male Reproductive System	Male	Unknown	Unknown	Illumina NovaSeq 6000	Unknown	2023-06-22	Brown Swiss	Male	Male	Unknown
SAMEA113601253	PRJEB46995	Bos taurus	Epididymis	Epididymis	Epididymis	Male Reproductive System	Male Reproductive System	Male	Unknown	Unknown	Illumina NovaSeq 6000	Unknown	2023-06-22	Original_Braunvieh	Male	Male	Unknown
SAMEA113601254	PRJEB46995	Bos taurus	Epididymis	Epididymis	Epididymis	Male Reproductive System	Male Reproductive System	Male	Unknown	Unknown	Illumina NovaSeq 6000	Unknown	2023-06-22	Brown Swiss	Male	Male	Unknown
SAMEA113601255	PRJEB46995	Bos taurus	Epididymis	Epididymis	Epididymis	Male Reproductive System	Male Reproductive System	Male	Unknown	Unknown	Illumina NovaSeq 6000	Unknown	2023-06-22	Original_Braunvieh	Male	Male	Unknown
SAMEA113601257	PRJEB46995	Bos taurus	Epididymis	Epididymis	Epididymis	Male Reproductive System	Male Reproductive System	Male	Unknown	Unknown	Illumina NovaSeq 6000	Unknown	2023-06-22	Limousin	Male	Male	Unknown
SAMEA113601258	PRJEB46995	Bos taurus	Epididymis	Epididymis	Epididymis	Male Reproductive System	Male Reproductive System	Male	Unknown	Unknown	Illumina NovaSeq 6000	Unknown	2023-06-22	Brown Swiss	Male	Male	Unknown
SAMEA113601259	PRJEB46995	Bos taurus	Epididymis	Epididymis	Epididymis	Male Reproductive System	Male Reproductive System	Male	Unknown	Unknown	Illumina NovaSeq 6000	Unknown	2023-06-22	Brown Swiss	Male	Male	Unknown
SAMEA113601260	PRJEB46995	Bos taurus	Epididymis	Epididymis	Epididymis	Male Reproductive System	Male Reproductive System	Male	Unknown	Unknown	Illumina NovaSeq 6000	Unknown	2023-06-22	Brown Swiss	Male	Male	Unknown
SAMEA113601261	PRJEB46995	Bos taurus	Epididymis	Epididymis	Epididymis	Male Reproductive System	Male Reproductive System	Male	Unknown	Unknown	Illumina NovaSeq 6000	Unknown	2023-06-22	Original_Braunvieh	Male	Male	Unknown
SAMEA113601262	PRJEB46995	Bos taurus	Epididymis	Epididymis	Epididymis	Male Reproductive System	Male Reproductive System	Male	Unknown	Unknown	Illumina NovaSeq 6000	Unknown	2023-06-22	Brown Swiss	Male	Male	Unknown
SAMEA113601263	PRJEB46995	Bos taurus	Epididymis	Epididymis	Epididymis	Male Reproductive System	Male Reproductive System	Male	Unknown	Unknown	Illumina NovaSeq 6000	Unknown	2023-06-22	Brown Swiss	Male	Male	Unknown
SAMEA113601264	PRJEB46995	Bos taurus	Epididymis	Epididymis	Epididymis	Male Reproductive System	Male Reproductive System	Male	Unknown	Unknown	Illumina NovaSeq 6000	Unknown	2023-06-22	Brown Swiss	Male	Male	Stage5
SAMEA113601266	PRJEB46995	Bos taurus	Epididymis	Epididymis	Epididymis	Male Reproductive System	Male Reproductive System	Male	Unknown	Unknown	Illumina NovaSeq 6000	Unknown	2023-06-22	Brown Swiss	Male	Male	Stage5
SAMEA113601267	PRJEB46995	Bos taurus	Epididymis	Epididymis	Epididymis	Male Reproductive System	Male Reproductive System	Male	Unknown	Unknown	Illumina NovaSeq 6000	Unknown	2023-06-22	Simmental	Male	Male	Unknown
SAMEA113601268	PRJEB46995	Bos taurus	Epididymis	Epididymis	Epididymis	Male Reproductive System	Male Reproductive System	Male	Unknown	Unknown	Illumina NovaSeq 6000	Unknown	2023-06-22	Brown Swiss	Male	Male	Unknown
SAMEA113601269	PRJEB46995	Bos taurus	Epididymis	Epididymis	Epididymis	Male Reproductive System	Male Reproductive System	Male	Unknown	Unknown	Illumina NovaSeq 6000	Unknown	2023-06-22	Original_Braunvieh	Male	Male	Unknown
SAMEA113601270	PRJEB46995	Bos taurus	Epididymis	Epididymis	Epididymis	Male Reproductive System	Male Reproductive System	Male	Unknown	Unknown	Illumina NovaSeq 6000	Unknown	2023-06-22	Original_Braunvieh	Male	Male	Unknown
SAMEA113601271	PRJEB46995	Bos taurus	Epididymis	Epididymis	Epididymis	Male Reproductive System	Male Reproductive System	Male	Unknown	Unknown	Illumina NovaSeq 6000	Unknown	2023-06-22	Original_Braunvieh	Male	Male	Unknown
SAMEA113601272	PRJEB46995	Bos taurus	Epididymis	Epididymis	Epididymis	Male Reproductive System	Male Reproductive System	Male	Unknown	Unknown	Illumina NovaSeq 6000	Unknown	2023-06-22	Brown Swiss	Male	Male	Unknown
SAMEA113601273	PRJEB46995	Bos taurus	Epididymis	Epididymis	Epididymis	Male Reproductive System	Male Reproductive System	Male	Unknown	Unknown	Illumina NovaSeq 6000	Unknown	2023-06-22	Brown Swiss	Male	Male	Unknown
SAMEA113601274	PRJEB46995	Bos taurus	Epididymis	Epididymis	Epididymis	Male Reproductive System	Male Reproductive System	Male	Unknown	Unknown	Illumina NovaSeq 6000	Unknown	2023-06-22	Brown Swiss	Male	Male	Unknown
SAMEA113601275	PRJEB46995	Bos taurus	Epididymis	Epididymis	Epididymis	Male Reproductive System	Male Reproductive System	Male	Unknown	Unknown	Illumina NovaSeq 6000	Unknown	2023-06-22	Brown Swiss	Male	Male	Unknown
SAMEA113601276	PRJEB46995	Bos taurus	Epididymis	Epididymis	Epididymis	Male Reproductive System	Male Reproductive System	Male	Unknown	Unknown	Illumina NovaSeq 6000	Unknown	2023-06-22	Original_Braunvieh	Male	Male	Unknown
SAMEA113601277	PRJEB46995	Bos taurus	Epididymis	Epididymis	Epididymis	Male Reproductive System	Male Reproductive System	Male	Unknown	Unknown	Illumina NovaSeq 6000	Unknown	2023-06-22	Brown Swiss	Male	Male	Unknown
SAMEA113601278	PRJEB46995	Bos taurus	Epididymis	Epididymis	Epididymis	Male Reproductive System	Male Reproductive System	Male	Unknown	Unknown	Illumina NovaSeq 6000	Unknown	2023-06-22	Brown Swiss	Male	Male	Unknown
SAMEA113601279	PRJEB46995	Bos taurus	Epididymis	Epididymis	Epididymis	Male Reproductive System	Male Reproductive System	Male	Unknown	Unknown	Illumina NovaSeq 6000	Unknown	2023-06-22	Original_Braunvieh	Male	Male	Unknown
SAMEA113601280	PRJEB46995	Bos taurus	Epididymis	Epididymis	Epididymis	Male Reproductive System	Male Reproductive System	Male	Unknown	Unknown	Illumina NovaSeq 6000	Unknown	2023-06-22	Original_Braunvieh	Male	Male	Unknown
SAMEA113601281	PRJEB46995	Bos taurus	Epididymis	Epididymis	Epididymis	Male Reproductive System	Male Reproductive System	Male	Unknown	Unknown	Illumina NovaSeq 6000	Unknown	2023-06-22	Brown Swiss	Male	Male	Unknown
SAMEA113601282	PRJEB46995	Bos taurus	Epididymis	Epididymis	Epididymis	Male Reproductive System	Male Reproductive System	Male	Unknown	Unknown	Illumina NovaSeq 6000	Unknown	2023-06-22	Brown Swiss	Male	Male	Stage5
SAMEA113601283	PRJEB46995	Bos taurus	Epididymis	Epididymis	Epididymis	Male Reproductive System	Male Reproductive System	Male	Unknown	Unknown	Illumina NovaSeq 6000	Unknown	2023-06-22	Original_Braunvieh	Male	Male	Unknown
SAMEA113601284	PRJEB46995	Bos taurus	Epididymis	Epididymis	Epididymis	Male Reproductive System	Male Reproductive System	Male	Unknown	Unknown	Illumina NovaSeq 6000	Unknown	2023-06-22	Brown Swiss	Male	Male	Unknown
SAMEA113601285	PRJEB46995	Bos taurus	Epididymis	Epididymis	Epididymis	Male Reproductive System	Male Reproductive System	Male	Unknown	Unknown	Illumina NovaSeq 6000	Unknown	2023-06-22	Original_Braunvieh	Male	Male	Stage5
SAMEA113601286	PRJEB46995	Bos taurus	Epididymis	Epididymis	Epididymis	Male Reproductive System	Male Reproductive System	Male	Unknown	Unknown	Illumina NovaSeq 6000	Unknown	2023-06-22	Brown Swiss	Male	Male	Unknown
SAMEA113601287	PRJEB46995	Bos taurus	Epididymis	Epididymis	Epididymis	Male Reproductive System	Male Reproductive System	Male	Unknown	Unknown	Illumina NovaSeq 6000	Unknown	2023-06-22	Brown Swiss	Male	Male	Unknown
SAMEA113601288	PRJEB46995	Bos taurus	Epididymis	Epididymis	Epididymis	Male Reproductive System	Male Reproductive System	Male	Unknown	Unknown	Illumina NovaSeq 6000	Unknown	2023-06-22	Brown Swiss	Male	Male	Unknown
SAMEA113601289	PRJEB46995	Bos taurus	Epididymis	Epididymis	Epididymis	Male Reproductive System	Male Reproductive System	Male	Unknown	Unknown	Illumina NovaSeq 6000	Unknown	2023-06-22	Original_Braunvieh	Male	Male	Unknown
SAMEA113601290	PRJEB46995	Bos taurus	Epididymis	Epididymis	Epididymis	Male Reproductive System	Male Reproductive System	Male	Unknown	Unknown	Illumina NovaSeq 6000	Unknown	2023-06-22	Brown Swiss	Male	Male	Unknown
SAMEA113601291	PRJEB46995	Bos taurus	Epididymis	Epididymis	Epididymis	Male Reproductive System	Male Reproductive System	Male	Unknown	Unknown	Illumina NovaSeq 6000	Unknown	2023-06-22	Brown Swiss	Male	Male	Unknown
SAMEA113601292	PRJEB46995	Bos taurus	Epididymis	Epididymis	Epididymis	Male Reproductive System	Male Reproductive System	Male	Unknown	Unknown	Illumina NovaSeq 6000	Unknown	2023-06-22	Original_Braunvieh	Male	Male	Unknown
SAMEA113601293	PRJEB46995	Bos taurus	Epididymis	Epididymis	Epididymis	Male Reproductive System	Male Reproductive System	Male	Unknown	Unknown	Illumina NovaSeq 6000	Unknown	2023-06-22	Brown Swiss	Male	Male	Unknown
SAMEA113601294	PRJEB46995	Bos taurus	Epididymis	Epididymis	Epididymis	Male Reproductive System	Male Reproductive System	Male	Unknown	Unknown	Illumina NovaSeq 6000	Unknown	2023-06-22	Original_Braunvieh	Male	Male	Unknown
SAMEA113601295	PRJEB46995	Bos taurus	Epididymis	Epididymis	Epididymis	Male Reproductive System	Male Reproductive System	Male	Unknown	Unknown	Illumina NovaSeq 6000	Unknown	2023-06-22	Original_Braunvieh	Male	Male	Unknown
SAMEA113601296	PRJEB46995	Bos taurus	Epididymis	Epididymis	Epididymis	Male Reproductive System	Male Reproductive System	Male	Unknown	Unknown	Illumina NovaSeq 6000	Unknown	2023-06-22	Original_Braunvieh	Male	Male	Unknown
SAMEA113601297	PRJEB46995	Bos taurus	Epididymis	Epididymis	Epididymis	Male Reproductive System	Male Reproductive System	Male	Unknown	Unknown	Illumina NovaSeq 6000	Unknown	2023-06-22	Brown Swiss	Male	Male	Unknown
SAMEA14368213	PRJEB52710	Bos taurus	Ileum	Ileum	Ileum	Digestive System	Digestive System	Unknown	Hereford	Hereford	Illumina HiSeq 2000	Adult	2022-07-30	Hereford	Male	Male	Stage5
SAMEA14368215	PRJEB52710	Bos taurus	Caecum	Large Intestine	Large Intestine	Digestive System	Digestive System	Unknown	Hereford	Hereford	Illumina HiSeq 2000	Adult	2022-07-30	Hereford	Male	Male	Stage5
SAMEA14368218	PRJEB52710	Bos taurus	Colon	Colon	Colon	Digestive System	Digestive System	Unknown	Hereford	Hereford	Illumina HiSeq 2000	Adult	2022-07-30	Hereford	Male	Male	Stage5
SAMEA14368223	PRJEB52710	Bos taurus	Lymph Node	Lymph Node	Lymph Node	Immune System	Immune System	Unknown	Hereford	Hereford	Illumina HiSeq 2000	Adult	2022-07-30	Hereford	Male	Male	Stage5
SAMEA14368236	PRJEB52710	Bos taurus	Skin	Skin	Skin	Integumentary System	Integumentary System	Unknown	Hereford	Hereford	Illumina HiSeq 2000	Adult	2022-07-30	Hereford	Male	Female	Stage5
SAMEA14368242	PRJEB52710	Bos taurus	Pituitary	Pituitary	Pituitary	Nervous System	Nervous System	Unknown	Hereford	Hereford	Illumina HiSeq 2000	Adult	2022-07-30	Hereford	Male	Male	Stage4
SAMEA14368243	PRJEB52710	Bos taurus	Testis	Testis	Testis	Male Reproductive System	Male Reproductive System	Male	Hereford	Hereford	Illumina HiSeq 2000	Adult	2022-07-30	Hereford	Male	Male	Stage5
SAMEA14368246	PRJEB52710	Bos taurus	Caput Epididymis	Testis	Epididymis	Male Reproductive System	Male Reproductive System	Male	Hereford	Hereford	Illumina HiSeq 2000	Adult	2022-07-30	Hereford	Male	Male	Stage5
SAMEA14368252	PRJEB52710	Bos taurus	Mammary Gland	Mammary Gland	Mammary Gland	Mammary Gland	Mammary Gland	Unknown	Holstein	Holstein	Illumina HiSeq 2000	Adult	2022-07-30	Holstein	Female	Female	Stage5
SAMEA14368254	PRJEB52710	Bos taurus	Uterine Myometrium	Uterus	Uterus	Female Reproductive System	Female Reproductive System	Female	Hereford	Hereford	Illumina HiSeq 2000	Adult	2022-07-30	Hereford	Female	Female	Stage5
SAMEA14368259	PRJEB52710	Bos taurus	Rumen	Rumen	Rumen	Digestive System	Digestive System	Unknown	Hereford	Hereford	Illumina HiSeq 2000	Adult	2022-07-30	Hereford	Male	Male	Stage5
SAMEA14368265	PRJEB52710	Bos taurus	Duodenum	Duodenum	Duodenum	Digestive System	Digestive System	Unknown	Hereford	Hereford	Illumina HiSeq 2000	Adult	2022-07-30	Hereford	Male	Male	Stage4
SAMEA14368266	PRJEB52710	Bos taurus	Placetal Cranucle	Placenta	Placenta	Female Reproductive System	Female Reproductive System	Unknown	Hereford	Hereford	Illumina HiSeq 2000	Adult	2022-07-30	Hereford	Male	Female	Stage1
SAMEA14368268	PRJEB52710	Bos taurus	Jejunum	Jejunum	Jejunum	Digestive System	Digestive System	Unknown	Hereford	Hereford	Illumina HiSeq 2000	Adult	2022-07-30	Hereford	Male	Male	Stage5
SAMEA14368269	PRJEB52710	Bos taurus	Ileum	Ileum	Ileum	Digestive System	Digestive System	Unknown	Hereford	Hereford	Illumina HiSeq 2000	Adult	2022-07-30	Hereford	Male	Male	Unknown
SAMEA14368271	PRJEB52710	Bos taurus	Caecum	Large Intestine	Large Intestine	Digestive System	Digestive System	Unknown	Hereford	Hereford	Illumina HiSeq 2000	Adult	2022-07-30	Hereford	Male	Male	Stage5
SAMEA14368272	PRJEB52710	Bos taurus	Colon	Colon	Colon	Digestive System	Digestive System	Unknown	Hereford	Hereford	Illumina HiSeq 2000	Adult	2022-07-30	Hereford	Male	Male	Stage5
SAMEA14368276	PRJEB52710	Bos taurus	Lymph Node	Lymph Node	Lymph Node	Immune System	Immune System	Unknown	Hereford	Hereford	Illumina HiSeq 2000	Adult	2022-07-30	Hereford	Male	Male	Stage5
SAMEA14368285	PRJEB52710	Bos taurus	Skin	Skin	Skin	Integumentary System	Integumentary System	Unknown	Hereford	Hereford	Illumina HiSeq 2000	Adult	2022-07-30	Hereford	Male	Female	Stage5
SAMEA14368287	PRJEB52710	Bos taurus	Pituitary	Pituitary	Pituitary	Nervous System	Nervous System	Unknown	Hereford	Hereford	Illumina HiSeq 2000	Adult	2022-07-30	Hereford	Female	Male	Stage4
SAMEA14368288	PRJEB52710	Bos taurus	Mammary Gland	Mammary Gland	Mammary Gland	Mammary Gland	Mammary Gland	Unknown	Holstein	Holstein	Illumina HiSeq 2000	Adult	2022-07-30	Holstein	Female	Female	Unknown
SAMEA14368289	PRJEB52710	Bos taurus	Testis	Testis	Testis	Male Reproductive System	Male Reproductive System	Male	Hereford	Hereford	Illumina HiSeq 2000	Adult	2022-07-30	Hereford	Male	Male	Stage5
SAMEA14368291	PRJEB52710	Bos taurus	Caput Epididymis	Testis	Epididymis	Male Reproductive System	Male Reproductive System	Male	Hereford	Hereford	Illumina HiSeq 2000	Adult	2022-07-30	Hereford	Male	Male	Stage5
SAMEA14368304	PRJEB52710	Bos taurus	Cerebellum	CNS	CNS	Nervous System	Nervous System	Unknown	Hereford	Hereford	Illumina HiSeq 2000	Adult	2022-07-30	Hereford	Male	Male	Stage5
SAMEA14368321	PRJEB52710	Bos taurus	Brain	CNS	CNS	Nervous System	Nervous System	Unknown	Hereford	Hereford	Illumina HiSeq 2000	embryonic stage	2022-07-30	Hereford	Male	Male	Stage1
SAMEA14368355	PRJEB52710	Bos taurus	Liver	Liver	Liver	Liver	Liver	Unknown	Hereford	Hereford	Illumina HiSeq 2000	embryonic stage	2022-07-30	Hereford	Male	Male	Stage1
SAMEA14368364	PRJEB52710	Bos taurus	Placetal Cranucle	Placenta	Placenta	Female Reproductive System	Female Reproductive System	Unknown	Hereford	Hereford	Illumina HiSeq 2000	Adult	2022-07-30	Hereford	Male	Female	Stage1
SAMEA14368366	PRJEB52710	Bos taurus	Mammary Gland	Mammary Gland	Mammary Gland	Mammary Gland	Mammary Gland	Unknown	Holstein	Holstein	Illumina HiSeq 2000	embryonic stage	2022-07-30	Holstein	Female	Female	Stage5
SAMEA14368368	PRJEB52710	Bos taurus	Brain	CNS	CNS	Nervous System	Nervous System	Unknown	Hereford	Hereford	Illumina HiSeq 2000	embryonic stage	2022-07-30	Hereford	Male	Male	Stage1
SAMEA14368371	PRJEB52710	Bos taurus	Embryonic Gonad	Testis	Testis	Male Reproductive System	Male Reproductive System	Unknown	Hereford	Hereford	Illumina HiSeq 2000	embryonic stage	2022-07-30	Hereford	Male	Male	Stage1
SAMEA14368372	PRJEB52710	Bos taurus	Embryonic Gonad	Testis	Testis	Male Reproductive System	Male Reproductive System	Unknown	Hereford	Hereford	Illumina HiSeq 2000	embryonic stage	2022-07-30	Hereford	Male	Male	Stage1
SAMEA14368377	PRJEB52710	Bos taurus	Liver	Liver	Liver	Liver	Liver	Unknown	Hereford	Hereford	Illumina HiSeq 2000	embryonic stage	2022-07-30	Hereford	Male	Male	Stage1
SAMEA14368392	PRJEB52710	Bos taurus	Placental Cotyledon	Placenta	Placenta	Female Reproductive System	Female Reproductive System	Unknown	Hereford	Hereford	Illumina HiSeq 2000	embryonic stage	2022-07-30	Hereford	Male	Male	Stage1
SAMEA14368395	PRJEB52710	Bos taurus	Mammary Gland Parenchyma	Mammary Gland	Mammary Gland	Mammary Gland	Mammary Gland	Unknown	Holstein	Holstein	Illumina HiSeq 2000	Adult	2022-07-30	Holstein	Female	Female	Stage5
SAMEA14368397	PRJEB52710	Bos taurus	Mammary Gland Parenchyma	Mammary Gland	Mammary Gland	Mammary Gland	Mammary Gland	Unknown	Holstein	Holstein	Illumina HiSeq 2000	Adult	2022-07-30	Holstein	Female	Female	Unknown
SAMEA14368400	PRJEB52710	Bos taurus	Brain	CNS	CNS	Nervous System	Nervous System	Unknown	Hereford	Hereford	Illumina HiSeq 2000	embryonic stage	2022-07-30	Hereford	Female	Female	Stage1
SAMEA14368408	PRJEB52710	Bos taurus	Liver	Liver	Liver	Liver	Liver	Unknown	Hereford	Hereford	Illumina HiSeq 2000	embryonic stage	2022-07-30	Hereford	Female	Female	Stage1
SAMEA14368417	PRJEB52710	Bos taurus	Placetal Cranucle	Placenta	Placenta	Female Reproductive System	Female Reproductive System	Unknown	Hereford	Hereford	Illumina HiSeq 2000	Adult	2022-07-30	Hereford	Female	Female	Stage1
SAMEA14368423	PRJEB52710	Bos taurus	Mammary Gland	Mammary Gland	Mammary Gland	Mammary Gland	Mammary Gland	Unknown	Holstein	Holstein	Illumina HiSeq 2000	Adult	2022-07-30	Holstein	Female	Female	Stage5
SAMEA14368430	PRJEB52710	Bos taurus	Rumen	Rumen	Rumen	Digestive System	Digestive System	Unknown	Hereford	Hereford	Illumina HiSeq 2000	Adult	2022-07-30	Hereford	Male	Male	Stage5
SAMEA14368435	PRJEB52710	Bos taurus	Duodenum	Duodenum	Duodenum	Digestive System	Digestive System	Unknown	Hereford	Hereford	Illumina HiSeq 2000	Adult	2022-07-30	Hereford	Male	Male	Stage5
SAMEA2582698	PRJEB6377	Bos taurus	Hypothalamus	Hypothalamus	Hypothalamus	Nervous System	Nervous System	Male	Unknown	Unknown	Illumina Genome Analyzer II	Unknown	2014-06-06	Holstein	Male	Male	Stage5
SAMEA2582699	PRJEB6377	Bos taurus	Lung	Lung	Lung	Respiratory System	Respiratory System	Male	Unknown	Unknown	Illumina Genome Analyzer II	Unknown	2014-06-06	Angus	Male	Male	Stage5
SAMEA2582703	PRJEB6377	Bos taurus	Liver	Liver	Liver	Liver	Liver	Male	Unknown	Unknown	Illumina Genome Analyzer II	Unknown	2014-06-06	Holstein	Male	Male	Stage4
SAMEA3112174	PRJEB7696	Bos indicus	Liver	Liver	Liver	Liver	Liver	Unknown	Unknown	Unknown	Illumina HiSeq 2000	Unknown	2015-01-28	Brahman	Unknown	Male	Unknown
SAMEA3112186	PRJEB7696	Bos indicus	Liver	Liver	Liver	Liver	Liver	Unknown	Unknown	Unknown	Illumina HiSeq 2000	Unknown	2015-01-28	Brahman	Unknown	Male	Stage4
SAMEA3306037	PRJEB8831	Bos indicus	Liver	Liver	Liver	Liver	Liver	Male	Unknown	Unknown	Illumina HiSeq 2500	Unknown	2015-03-18	Brahman	Male	Male	Stage4
SAMEA3306038	PRJEB8831	Bos indicus	Liver	Liver	Liver	Liver	Liver	Male	Unknown	Unknown	Illumina HiSeq 2500	Unknown	2015-03-18	Brahman	Male	Male	Stage4
SAMEA3306039	PRJEB8831	Bos indicus	Liver	Liver	Liver	Liver	Liver	Male	Unknown	Unknown	Illumina HiSeq 2500	Unknown	2015-03-18	Brahman	Male	Male	Unknown
SAMEA3306040	PRJEB8831	Bos indicus	Liver	Liver	Liver	Liver	Liver	Male	Unknown	Unknown	Illumina HiSeq 2500	Unknown	2015-03-18	Brahman	Male	Male	Stage4
SAMEA3306041	PRJEB8831	Bos indicus	Liver	Liver	Liver	Liver	Liver	Male	Unknown	Unknown	Illumina HiSeq 2500	Unknown	2015-03-18	Brahman	Male	Male	Stage4
SAMEA3306042	PRJEB8831	Bos indicus	Liver	Liver	Liver	Liver	Liver	Male	Unknown	Unknown	Illumina HiSeq 2500	Unknown	2015-03-18	Brahman	Male	Male	Stage4
SAMEA3306044	PRJEB8831	Bos indicus	Liver	Liver	Liver	Liver	Liver	Male	Unknown	Unknown	Illumina HiSeq 2500	Unknown	2015-03-18	Brahman	Male	Male	Stage4
SAMEA3306045	PRJEB8831	Bos indicus	Liver	Liver	Liver	Liver	Liver	Male	Unknown	Unknown	Illumina HiSeq 2500	Unknown	2015-03-18	Brahman	Male	Male	Stage4
SAMEA3306046	PRJEB8831	Bos indicus	Liver	Liver	Liver	Liver	Liver	Male	Unknown	Unknown	Illumina HiSeq 2500	Unknown	2015-03-18	Brahman	Male	Male	Stage4
SAMEA3306047	PRJEB8831	Bos indicus	Liver	Liver	Liver	Liver	Liver	Male	Unknown	Unknown	Illumina HiSeq 2500	Unknown	2015-03-18	Brahman	Male	Male	Unknown
SAMEA3306048	PRJEB8831	Bos indicus	Liver	Liver	Liver	Liver	Liver	Male	Unknown	Unknown	Illumina HiSeq 2500	Unknown	2015-03-18	Brahman	Male	Male	Unknown
SAMEA3306049	PRJEB8831	Bos indicus	Liver	Liver	Liver	Liver	Liver	Male	Unknown	Unknown	Illumina HiSeq 2500	Unknown	2015-03-18	Brahman	Male	Male	Stage4
SAMEA3306050	PRJEB8831	Bos indicus	Liver	Liver	Liver	Liver	Liver	Male	Unknown	Unknown	Illumina HiSeq 2500	Unknown	2015-03-18	Brahman	Male	Male	Unknown
SAMEA3306051	PRJEB8831	Bos indicus	Liver	Liver	Liver	Liver	Liver	Male	Unknown	Unknown	Illumina HiSeq 2500	Unknown	2015-03-18	Brahman	Male	Male	Stage4
SAMEA3308496	PRJEB8831	Bos indicus	Liver	Liver	Liver	Liver	Liver	Male	Unknown	Unknown	Illumina HiSeq 2500	Unknown	2015-03-18	Brahman	Male	Male	Stage4
SAMEA3682661	PRJEB11965	Bos taurus	Liver	Liver	Liver	Liver	Liver	Unknown	Holstein	Holstein	Illumina HiSeq 2500	Unknown	2016-02-01	Holstein	Male	Male	Stage4
SAMEA3903350	PRJEB13074	Bos taurus	Liver	Liver	Liver	Liver	Liver	Male	Unknown	Unknown	Illumina HiSeq 2000	Adult	2017-10-13	Limousin	Male	Male	Stage5
SAMEA3903351	PRJEB13074	Bos taurus	Liver	Liver	Liver	Liver	Liver	Male	Unknown	Unknown	Illumina HiSeq 2000	Adult	2017-10-13	Limousin	Male	Male	Stage5
SAMEA3903378	PRJEB13074	Bos taurus	Liver	Liver	Liver	Liver	Liver	Male	Unknown	Unknown	Illumina HiSeq 2000	Adult	2017-10-13	Limousin	Male	Male	Stage5
SAMEA4051551	PRJEB14606	Bos taurus	Skin	Skin	Skin	Integumentary System	Integumentary System	Unknown	Unknown	Unknown	Illumina HiSeq 2500	Unknown	2016-07-14	Holstein	Male	Female	Stage5
SAMEA4051552	PRJEB14606	Bos taurus	Skin	Skin	Skin	Integumentary System	Integumentary System	Unknown	Unknown	Unknown	Illumina HiSeq 2500	Unknown	2016-07-14	Original_Braunvieh	Female	Female	Stage5
SAMEA4051553	PRJEB14606	Bos taurus	Skin	Skin	Skin	Integumentary System	Integumentary System	Unknown	Unknown	Unknown	Illumina HiSeq 2500	Unknown	2016-07-14	Original_Braunvieh	Female	Female	Stage5
SAMEA4051554	PRJEB14606	Bos taurus	Skin	Skin	Skin	Integumentary System	Integumentary System	Unknown	Unknown	Unknown	Illumina HiSeq 2500	Unknown	2016-07-14	Original_Braunvieh	Female	Female	Stage5
SAMEA4051555	PRJEB14606	Bos taurus	Skin	Skin	Skin	Integumentary System	Integumentary System	Unknown	Unknown	Unknown	Illumina HiSeq 2500	Unknown	2016-07-14	Original_Braunvieh	Female	Female	Stage5
SAMEA4051556	PRJEB14606	Bos taurus	Skin	Skin	Skin	Integumentary System	Integumentary System	Unknown	Unknown	Unknown	Illumina HiSeq 2500	Unknown	2016-07-14	Original_Braunvieh	Female	Female	Stage5
SAMEA4051557	PRJEB14606	Bos taurus	Skin	Skin	Skin	Integumentary System	Integumentary System	Unknown	Unknown	Unknown	Illumina HiSeq 2500	Unknown	2016-07-14	Original_Braunvieh	Female	Female	Stage5
SAMEA4447763	PRJEB35127	Bos taurus	Cerebellum	CNS	CNS	Nervous System	Nervous System	Unknown	Unknown	Unknown	Illumina HiSeq 3000	Embryo	2019-10-30	Holstein	Female	Female	Stage1
SAMEA4447764	PRJEB35127	Bos taurus	Placenta	Placenta	Placenta	Female Reproductive System	Female Reproductive System	Unknown	Unknown	Unknown	Illumina HiSeq 3000	Embryo	2019-10-30	Holstein	Male	Female	Stage1
SAMEA4447766	PRJEB35127	Bos taurus	Lung	Lung	Lung	Respiratory System	Respiratory System	Unknown	Unknown	Unknown	Illumina HiSeq 3000	Embryo	2019-10-30	Holstein	Female	Female	Stage1
SAMEA4447767	PRJEB35127	Bos taurus	Lung	Lung	Lung	Respiratory System	Respiratory System	Unknown	Unknown	Unknown	Illumina HiSeq 3000	Embryo	2019-10-30	Holstein	Female	Female	Stage1
SAMEA4447779	PRJEB35127	Bos taurus	Brain	CNS	CNS	Nervous System	Nervous System	Unknown	Unknown	Unknown	Illumina HiSeq 3000	Embryo	2019-10-30	Holstein	Female	Female	Stage1
SAMEA4447787	PRJEB35127	Bos taurus	Liver	Liver	Liver	Liver	Liver	Unknown	Unknown	Unknown	Illumina HiSeq 3000	Embryo	2019-10-30	Holstein	Female	Female	Stage1
SAMEA4447790	PRJEB35127	Bos taurus	Skin	Skin	Skin	Integumentary System	Integumentary System	Unknown	Unknown	Unknown	Illumina HiSeq 3000	Embryo	2019-10-30	Holstein	Female	Female	Stage1
SAMEA4447792	PRJEB35127	Bos taurus	Liver	Liver	Liver	Liver	Liver	Unknown	Unknown	Unknown	Illumina HiSeq 3000	Embryo	2019-10-30	Holstein	Male	Female	Stage1
SAMEA4447800	PRJEB35127	Bos taurus	Placenta	Placenta	Placenta	Female Reproductive System	Female Reproductive System	Unknown	Unknown	Unknown	Illumina HiSeq 3000	Embryo	2019-10-30	Holstein	Female	Female	Stage1
SAMEA4447801	PRJEB35127	Bos taurus	Heart	Heart	Heart	Cardiovascular System	Cardiovascular System	Unknown	Unknown	Unknown	Illumina HiSeq 3000	Embryo	2019-10-30	Holstein	Female	Female	Stage1
SAMEA4447802	PRJEB35127	Bos taurus	Spleen	Spleen	Spleen	Immune System	Immune System	Unknown	Unknown	Unknown	Illumina HiSeq 3000	Embryo	2019-10-30	Holstein	Female	Female	Stage1
SAMEA4447803	PRJEB35127	Bos taurus	Brain	CNS	CNS	Nervous System	Nervous System	Unknown	Unknown	Unknown	Illumina HiSeq 3000	Embryo	2019-10-30	Holstein	Male	Female	Stage1
SAMEA4447804	PRJEB35127	Bos taurus	Skin	Skin	Skin	Integumentary System	Integumentary System	Unknown	Unknown	Unknown	Illumina HiSeq 3000	Embryo	2019-10-30	Holstein	Female	Female	Stage1
SAMEA4447806	PRJEB35127	Bos taurus	Spleen	Spleen	Spleen	Immune System	Immune System	Unknown	Unknown	Unknown	Illumina HiSeq 3000	Embryo	2019-10-30	Holstein	Female	Female	Stage1
SAMEA4447808	PRJEB35127	Bos taurus	Lymph Node	Lymph Node	Lymph Node	Immune System	Immune System	Unknown	Unknown	Unknown	Illumina HiSeq 3000	Embryo	2019-10-30	Holstein	Female	Female	Stage1
SAMEA4447809	PRJEB35127	Bos taurus	Heart	Heart	Heart	Cardiovascular System	Cardiovascular System	Unknown	Unknown	Unknown	Illumina HiSeq 3000	Embryo	2019-10-30	Holstein	Female	Female	Stage1
SAMEA4447814	PRJEB35127	Bos taurus	Liver	Liver	Liver	Liver	Liver	Unknown	Unknown	Unknown	Illumina HiSeq 3000	Embryo	2019-10-30	Holstein	Female	Female	Stage1
SAMEA4447815	PRJEB35127	Bos taurus	Lymph Node	Lymph Node	Lymph Node	Immune System	Immune System	Unknown	Unknown	Unknown	Illumina HiSeq 3000	Embryo	2019-10-30	Holstein	Female	Female	Stage1
SAMEA4447821	PRJEB35127	Bos taurus	Pituitary	Pituitary	Pituitary	Nervous System	Nervous System	Unknown	Unknown	Unknown	Illumina HiSeq 3000	Embryo	2019-10-30	Holstein	Female	Female	Stage1
SAMEA4447823	PRJEB35127	Bos taurus	Liver	Liver	Liver	Liver	Liver	Unknown	Unknown	Unknown	Illumina HiSeq 3000	Embryo	2019-10-30	Holstein	Female	Female	Stage1
SAMEA4447830	PRJEB35127	Bos taurus	Mammary Gland	Mammary Gland	Mammary Gland	Mammary Gland	Mammary Gland	Unknown	Unknown	Unknown	Illumina HiSeq 3000	Embryo	2019-10-30	Holstein	Female	Female	Stage5
SAMEA4447833	PRJEB35127	Bos taurus	Brain	CNS	CNS	Nervous System	Nervous System	Unknown	Unknown	Unknown	Illumina HiSeq 3000	Embryo	2019-10-30	Holstein	Female	Female	Stage1
SAMEA4447834	PRJEB35127	Bos taurus	Pituitary	Pituitary	Pituitary	Nervous System	Nervous System	Unknown	Unknown	Unknown	Illumina HiSeq 3000	Embryo	2019-10-30	Holstein	Female	Female	Stage1
SAMEA4454627	PRJEB14330	Bos taurus	Hypothalamus	Hypothalamus	Hypothalamus	Nervous System	Nervous System	Unknown	Unknown	Unknown	Illumina HiSeq 3000	14 years	2016-08-08	Hereford	Male	Male	Stage5
SAMEA4454667	PRJEB14330	Bos taurus	Lobe Of Liver	Liver	Liver	Liver	Liver	Unknown	Unknown	Unknown	Illumina HiSeq 3000	14 years	2016-08-08	Hereford	Male	Male	Stage5
SAMEA4454784	PRJEB14330	Bos taurus	Spleen	Spleen	Spleen	Immune System	Immune System	Unknown	Unknown	Unknown	Illumina HiSeq 3000	14 years	2016-08-08	Hereford	Male	Male	Stage5
SAMEA4454929	PRJEB14330	Bos taurus	Left Lung Lobe	Lung	Lung	Respiratory System	Respiratory System	Unknown	Unknown	Unknown	Illumina HiSeq 3000	14 years	2016-08-08	Hereford	Male	Male	Stage5
SAMEA4455415	PRJEB14330	Bos taurus	Lobe Of Liver	Liver	Liver	Liver	Liver	Unknown	Unknown	Unknown	Illumina HiSeq 3000	14 years	2016-08-08	Hereford	Male	Male	Stage5
SAMEA4455432	PRJEB14330	Bos taurus	Spleen	Spleen	Spleen	Immune System	Immune System	Unknown	Unknown	Unknown	Illumina HiSeq 3000	14 years	2016-08-08	Hereford	Male	Male	Stage5
SAMEA4455442	PRJEB14330	Bos taurus	Left Lung Lobe	Lung	Lung	Respiratory System	Respiratory System	Unknown	Unknown	Unknown	Illumina HiSeq 3000	14 years	2016-08-08	Hereford	Male	Male	Stage5
SAMEA4455466	PRJEB14330	Bos taurus	Hypothalamus	Hypothalamus	Hypothalamus	Nervous System	Nervous System	Unknown	Unknown	Unknown	Illumina HiSeq 3000	14 years	2016-08-08	Hereford	Male	Male	Stage5
SAMEA4455469	PRJEB14330	Bos taurus	Cerebellum	CNS	CNS	Nervous System	Nervous System	Unknown	Unknown	Unknown	Illumina HiSeq 3000	14 years	2016-08-08	Hereford	Female	Male	Stage5
SAMEA4675144	PRJEB25677	Bos taurus	Lymph Node	Lymph Node	Lymph Node	Immune System	Immune System	Unknown	Holstein	Holstein	Illumina Genome Analyzer IIx	2 years	2018-03-23	Holstein	Female	Female	Stage5
SAMEA4675145	PRJEB25677	Bos taurus	Spleen	Spleen	Spleen	Immune System	Immune System	Unknown	Holstein	Holstein	Illumina Genome Analyzer IIx	2 years	2018-03-23	Holstein	Female	Female	Stage5
SAMEA4675150	PRJEB25677	Bos taurus	Mammary Gland	Mammary Gland	Mammary Gland	Mammary Gland	Mammary Gland	Unknown	Holstein	Holstein	Illumina Genome Analyzer IIx	2 years	2018-03-23	Holstein	Female	Female	Stage5
SAMEA4675152	PRJEB25677	Bos taurus	Skin	Skin	Skin	Integumentary System	Integumentary System	Unknown	Holstein	Holstein	Illumina Genome Analyzer IIx	2 years	2018-03-23	Holstein	Female	Female	Stage5
SAMEA4819581	PRJEB28074	Bos taurus	Blood	Blood	Blood	Immune System	Immune System	Female	Unknown	Unknown	Illumina HiSeq 3000	Unknown	2019-01-24	Holstein	Female	Female	Stage5
SAMEA4819582	PRJEB28074	Bos taurus	Blood	Blood	Blood	Immune System	Immune System	Female	Unknown	Unknown	Illumina HiSeq 3000	Unknown	2019-01-24	Holstein	Female	Female	Stage5
SAMEA4819583	PRJEB28074	Bos taurus	Blood	Blood	Blood	Immune System	Immune System	Female	Unknown	Unknown	Illumina HiSeq 3000	Unknown	2019-01-24	Holstein	Female	Female	Stage5
SAMEA4819584	PRJEB28074	Bos taurus	Blood	Blood	Blood	Immune System	Immune System	Female	Unknown	Unknown	Illumina HiSeq 3000	Unknown	2019-01-24	Holstein	Female	Female	Stage5
SAMEA4819586	PRJEB28074	Bos taurus	Blood	Blood	Blood	Immune System	Immune System	Female	Unknown	Unknown	Illumina HiSeq 3000	Unknown	2019-01-24	Holstein	Female	Female	Stage5
SAMEA4819587	PRJEB28074	Bos taurus	Blood	Blood	Blood	Immune System	Immune System	Female	Unknown	Unknown	Illumina HiSeq 3000	Unknown	2019-01-24	Yakut	Female	Female	Stage5
SAMEA4819588	PRJEB28074	Bos taurus	Blood	Blood	Blood	Immune System	Immune System	Female	Unknown	Unknown	Illumina HiSeq 3000	Unknown	2019-01-24	Yakut	Female	Female	Stage5
SAMEA4819589	PRJEB28074	Bos taurus	Blood	Blood	Blood	Immune System	Immune System	Female	Unknown	Unknown	Illumina HiSeq 3000	Unknown	2019-01-24	Yakut	Female	Female	Stage5
SAMEA4851285	PRJEB28324	Bos taurus	Blood	Blood	Blood	Immune System	Immune System	Unknown	Unknown	Unknown	Illumina HiSeq 3000	Unknown	2018-10-25	Simmental	Female	Female	Unknown
SAMEA4851290	PRJEB28324	Bos taurus	Blood	Blood	Blood	Immune System	Immune System	Unknown	Unknown	Unknown	Illumina HiSeq 3000	Unknown	2018-10-25	Holstein	Female	Female	Stage4
SAMEA4851292	PRJEB28324	Bos taurus	Blood	Blood	Blood	Immune System	Immune System	Unknown	Unknown	Unknown	Illumina HiSeq 3000	Unknown	2018-10-25	Brown Swiss	Female	Female	Unknown
SAMEA4852427	PRJEB28324	Bos taurus	Blood	Blood	Blood	Immune System	Immune System	Unknown	Unknown	Unknown	Illumina HiSeq 3000	Unknown	2018-10-25	Holstein	Female	Female	Stage5
SAMEA4852432	PRJEB28324	Bos taurus	Blood	Blood	Blood	Immune System	Immune System	Unknown	Unknown	Unknown	Illumina HiSeq 3000	Unknown	2018-10-25	Simmental	Female	Female	Stage5
SAMEA4852437	PRJEB28324	Bos taurus	Blood	Blood	Blood	Immune System	Immune System	Unknown	Unknown	Unknown	Illumina HiSeq 3000	Unknown	2018-10-25	Holstein	Female	Female	Stage5
SAMEA4862008	PRJEB27337	Bos indicus	Pituitary Gland	Pituitary	Pituitary	Nervous System	Nervous System	Unknown	Unknown	Unknown	Illumina HiSeq 2500	2	2018-07-04	Brahman	Unknown	Male	Unknown
SAMEA4862010	PRJEB27337	Bos indicus	Hypothalamus	Hypothalamus	Hypothalamus	Nervous System	Nervous System	Unknown	Unknown	Unknown	Illumina HiSeq 2500	2	2018-07-04	Brahman	Unknown	Male	Stage5
SAMEA4862013	PRJEB27337	Bos indicus	Pituitary Gland	Pituitary	Pituitary	Nervous System	Nervous System	Unknown	Unknown	Unknown	Illumina HiSeq 2500	2	2018-07-04	Brahman	Unknown	Male	Stage5
SAMEA4862016	PRJEB27337	Bos indicus	Hypothalamus	Hypothalamus	Hypothalamus	Nervous System	Nervous System	Unknown	Unknown	Unknown	Illumina HiSeq 2500	2	2018-07-04	Brahman	Unknown	Male	Stage5
SAMEA4862017	PRJEB27337	Bos indicus	Hypothalamus	Hypothalamus	Hypothalamus	Nervous System	Nervous System	Unknown	Unknown	Unknown	Illumina HiSeq 2500	2	2018-07-04	Brahman	Unknown	Male	Stage5
SAMEA4862018	PRJEB27337	Bos indicus	Liver	Liver	Liver	Liver	Liver	Unknown	Unknown	Unknown	Illumina HiSeq 2500	2	2018-07-04	Brahman	Unknown	Male	Unknown
SAMEA4862022	PRJEB27337	Bos indicus	Pituitary Gland	Pituitary	Pituitary	Nervous System	Nervous System	Unknown	Unknown	Unknown	Illumina HiSeq 2500	2	2018-07-04	Brahman	Unknown	Male	Stage5
SAMEA4862023	PRJEB27337	Bos indicus	Pituitary Gland	Pituitary	Pituitary	Nervous System	Nervous System	Unknown	Unknown	Unknown	Illumina HiSeq 2500	2	2018-07-04	Brahman	Unknown	Male	Unknown
SAMEA4862024	PRJEB27337	Bos indicus	Hypothalamus	Hypothalamus	Hypothalamus	Nervous System	Nervous System	Unknown	Unknown	Unknown	Illumina HiSeq 2500	2	2018-07-04	Brahman	Unknown	Male	Stage5
SAMEA4862025	PRJEB27337	Bos indicus	Pituitary Gland	Pituitary	Pituitary	Nervous System	Nervous System	Unknown	Unknown	Unknown	Illumina HiSeq 2500	2	2018-07-04	Brahman	Unknown	Male	Stage5
SAMEA4862027	PRJEB27337	Bos indicus	Hypothalamus	Hypothalamus	Hypothalamus	Nervous System	Nervous System	Unknown	Unknown	Unknown	Illumina HiSeq 2500	2	2018-07-04	Brahman	Unknown	Male	Stage5
SAMEA4862029	PRJEB27337	Bos indicus	Pituitary Gland	Pituitary	Pituitary	Nervous System	Nervous System	Unknown	Unknown	Unknown	Illumina HiSeq 2500	2	2018-07-04	Brahman	Unknown	Male	Unknown
SAMEA4862030	PRJEB27337	Bos indicus	Hypothalamus	Hypothalamus	Hypothalamus	Nervous System	Nervous System	Unknown	Unknown	Unknown	Illumina HiSeq 2500	2	2018-07-04	Brahman	Unknown	Male	Stage5
SAMEA4862033	PRJEB27337	Bos indicus	Hypothalamus	Hypothalamus	Hypothalamus	Nervous System	Nervous System	Unknown	Unknown	Unknown	Illumina HiSeq 2500	2	2018-07-04	Brahman	Unknown	Male	Stage5
SAMEA4862034	PRJEB27337	Bos indicus	Liver	Liver	Liver	Liver	Liver	Unknown	Unknown	Unknown	Illumina HiSeq 2500	2	2018-07-04	Brahman	Unknown	Male	Unknown
SAMEA4862035	PRJEB27337	Bos indicus	Liver	Liver	Liver	Liver	Liver	Unknown	Unknown	Unknown	Illumina HiSeq 2500	2	2018-07-04	Brahman	Unknown	Male	Stage4
SAMEA4862037	PRJEB27337	Bos indicus	Pituitary Gland	Pituitary	Pituitary	Nervous System	Nervous System	Unknown	Unknown	Unknown	Illumina HiSeq 2500	2	2018-07-04	Brahman	Unknown	Male	Unknown
SAMEA4862041	PRJEB27337	Bos indicus	Hypothalamus	Hypothalamus	Hypothalamus	Nervous System	Nervous System	Unknown	Unknown	Unknown	Illumina HiSeq 2500	2	2018-07-04	Brahman	Unknown	Male	Stage5
SAMEA4862044	PRJEB27337	Bos indicus	Pituitary Gland	Pituitary	Pituitary	Nervous System	Nervous System	Unknown	Unknown	Unknown	Illumina HiSeq 2500	2	2018-07-04	Brahman	Unknown	Male	Unknown
SAMEA4862046	PRJEB27337	Bos indicus	Liver	Liver	Liver	Liver	Liver	Unknown	Unknown	Unknown	Illumina HiSeq 2500	2	2018-07-04	Brahman	Unknown	Male	Unknown
SAMEA4862047	PRJEB27337	Bos indicus	Pituitary Gland	Pituitary	Pituitary	Nervous System	Nervous System	Unknown	Unknown	Unknown	Illumina HiSeq 2500	2	2018-07-04	Brahman	Unknown	Male	Unknown
SAMEA4862049	PRJEB27337	Bos indicus	Liver	Liver	Liver	Liver	Liver	Unknown	Unknown	Unknown	Illumina HiSeq 2500	2	2018-07-04	Brahman	Unknown	Male	Stage4
SAMEA4862050	PRJEB27337	Bos indicus	Pituitary Gland	Pituitary	Pituitary	Nervous System	Nervous System	Unknown	Unknown	Unknown	Illumina HiSeq 2500	2	2018-07-04	Brahman	Unknown	Male	Stage4
SAMEA4862051	PRJEB27337	Bos indicus	Pituitary Gland	Pituitary	Pituitary	Nervous System	Nervous System	Unknown	Unknown	Unknown	Illumina HiSeq 2500	2	2018-07-04	Brahman	Unknown	Male	Stage5
SAMEA4862054	PRJEB27337	Bos indicus	Liver	Liver	Liver	Liver	Liver	Unknown	Unknown	Unknown	Illumina HiSeq 2500	2	2018-07-04	Brahman	Unknown	Male	Unknown
SAMEA4862057	PRJEB27337	Bos indicus	Pituitary Gland	Pituitary	Pituitary	Nervous System	Nervous System	Unknown	Unknown	Unknown	Illumina HiSeq 2500	2	2018-07-04	Brahman	Unknown	Male	Unknown
SAMEA4862058	PRJEB27337	Bos indicus	Hypothalamus	Hypothalamus	Hypothalamus	Nervous System	Nervous System	Unknown	Unknown	Unknown	Illumina HiSeq 2500	2	2018-07-04	Brahman	Unknown	Male	Stage5
SAMEA4862064	PRJEB27337	Bos indicus	Pituitary Gland	Pituitary	Pituitary	Nervous System	Nervous System	Unknown	Unknown	Unknown	Illumina HiSeq 2500	2	2018-07-04	Brahman	Unknown	Male	Stage5
SAMEA4862065	PRJEB27337	Bos indicus	Hypothalamus	Hypothalamus	Hypothalamus	Nervous System	Nervous System	Unknown	Unknown	Unknown	Illumina HiSeq 2500	2	2018-07-04	Brahman	Unknown	Male	Stage5
SAMEA4862066	PRJEB27337	Bos indicus	Pituitary Gland	Pituitary	Pituitary	Nervous System	Nervous System	Unknown	Unknown	Unknown	Illumina HiSeq 2500	2	2018-07-04	Brahman	Unknown	Male	Unknown
SAMEA4862077	PRJEB27337	Bos indicus	Hypothalamus	Hypothalamus	Hypothalamus	Nervous System	Nervous System	Unknown	Unknown	Unknown	Illumina HiSeq 2500	2	2018-07-04	Brahman	Unknown	Male	Stage5
SAMEA4862080	PRJEB27337	Bos indicus	Pituitary Gland	Pituitary	Pituitary	Nervous System	Nervous System	Unknown	Unknown	Unknown	Illumina HiSeq 2500	2	2018-07-04	Brahman	Unknown	Male	Unknown
SAMEA4862084	PRJEB27337	Bos indicus	Hypothalamus	Hypothalamus	Hypothalamus	Nervous System	Nervous System	Unknown	Unknown	Unknown	Illumina HiSeq 2500	2	2018-07-04	Brahman	Unknown	Male	Stage5
SAMEA4862087	PRJEB27337	Bos indicus	Hypothalamus	Hypothalamus	Hypothalamus	Nervous System	Nervous System	Unknown	Unknown	Unknown	Illumina HiSeq 2500	2	2018-07-04	Brahman	Unknown	Male	Stage5
SAMEA4862090	PRJEB27337	Bos indicus	Pituitary Gland	Pituitary	Pituitary	Nervous System	Nervous System	Unknown	Unknown	Unknown	Illumina HiSeq 2500	2	2018-07-04	Brahman	Unknown	Male	Unknown
SAMEA4862097	PRJEB27337	Bos indicus	Pituitary Gland	Pituitary	Pituitary	Nervous System	Nervous System	Unknown	Unknown	Unknown	Illumina HiSeq 2500	2	2018-07-04	Brahman	Unknown	Male	Unknown
SAMEA4862103	PRJEB27337	Bos indicus	Liver	Liver	Liver	Liver	Liver	Unknown	Unknown	Unknown	Illumina HiSeq 2500	2	2018-07-04	Brahman	Unknown	Male	Stage4
SAMEA4862106	PRJEB27337	Bos indicus	Hypothalamus	Hypothalamus	Hypothalamus	Nervous System	Nervous System	Unknown	Unknown	Unknown	Illumina HiSeq 2500	2	2018-07-04	Brahman	Unknown	Male	Stage5
SAMEA4862109	PRJEB27337	Bos indicus	Hypothalamus	Hypothalamus	Hypothalamus	Nervous System	Nervous System	Unknown	Unknown	Unknown	Illumina HiSeq 2500	2	2018-07-04	Brahman	Unknown	Male	Stage5
SAMEA4999496	PRJEB28653	Bos taurus	Blood	Blood	Blood	Immune System	Immune System	Unknown	Unknown	Unknown	NextSeq 500	9 years	2018-09-19	Angus	Male	Male	Stage5
SAMEA4999498	PRJEB28653	Bos taurus	Blood	Blood	Blood	Immune System	Immune System	Unknown	Unknown	Unknown	NextSeq 500	4 years	2018-09-19	Angus	Male	Male	Stage5
SAMEA4999499	PRJEB28653	Bos taurus	Blood	Blood	Blood	Immune System	Immune System	Unknown	Unknown	Unknown	NextSeq 500	9 years	2018-09-19	Angus	Male	Male	Stage5
SAMEA4999502	PRJEB28653	Bos taurus	Blood	Blood	Blood	Immune System	Immune System	Unknown	Unknown	Unknown	NextSeq 500	9 years	2018-09-19	Angus	Male	Male	Stage5
SAMEA4999504	PRJEB28653	Bos taurus	Blood	Blood	Blood	Immune System	Immune System	Unknown	Unknown	Unknown	NextSeq 500	9 years	2018-09-19	Angus	Male	Male	Stage5
SAMEA4999542	PRJEB28653	Bos taurus	Blood	Blood	Blood	Immune System	Immune System	Unknown	Unknown	Unknown	NextSeq 500	5 years	2018-09-19	Angus	Male	Male	Stage5
SAMEA4999556	PRJEB28653	Bos taurus	Blood	Blood	Blood	Immune System	Immune System	Unknown	Unknown	Unknown	NextSeq 500	9 years	2018-09-19	Angus	Male	Male	Stage5
SAMEA4999559	PRJEB28653	Bos taurus	Blood	Blood	Blood	Immune System	Immune System	Unknown	Unknown	Unknown	NextSeq 500	9 years	2018-09-19	Angus	Male	Male	Stage5
SAMEA4999572	PRJEB28653	Bos taurus	Blood	Blood	Blood	Immune System	Immune System	Unknown	Unknown	Unknown	NextSeq 500	9 years	2018-09-19	Angus	Male	Male	Stage5
SAMEA4999592	PRJEB28653	Bos taurus	Blood	Blood	Blood	Immune System	Immune System	Unknown	Unknown	Unknown	NextSeq 500	9 years	2018-09-19	Angus	Male	Male	Stage5
SAMEA4999593	PRJEB28653	Bos taurus	Blood	Blood	Blood	Immune System	Immune System	Unknown	Unknown	Unknown	NextSeq 500	9 years	2018-09-19	Angus	Male	Male	Stage5
SAMEA4999607	PRJEB28653	Bos taurus	Blood	Blood	Blood	Immune System	Immune System	Unknown	Unknown	Unknown	NextSeq 500	9 years	2018-09-19	Angus	Male	Male	Stage5
SAMEA5160183	PRJEB30263	Bos taurus	Lactating Mammary Gland	Mammary Gland	Mammary Gland	Mammary Gland	Mammary Gland	Female	Holstein	Holstein	Illumina HiSeq 2500	Unknown	2019-05-05	Holstein	Female	Female	Stage5
SAMEA5160184	PRJEB30263	Bos taurus	Lactating Mammary Gland	Mammary Gland	Mammary Gland	Mammary Gland	Mammary Gland	Female	Holstein	Holstein	Illumina HiSeq 2500	Unknown	2019-05-05	Holstein	Female	Female	Stage5
SAMEA5160190	PRJEB30263	Bos taurus	Lactating Mammary Gland	Mammary Gland	Mammary Gland	Mammary Gland	Mammary Gland	Female	Holstein	Holstein	Illumina HiSeq 2500	Unknown	2019-05-05	Holstein	Female	Female	Stage5
SAMEA5567756	PRJEB32183	Bos taurus	Embryonic Gonadal Ridge	Testis	Testis	Male Reproductive System	Male Reproductive System	Male	Charolais	Charolais	Illumina HiSeq 2500	35 days	2019-09-03	Charolais	Male	Male	Stage2
SAMEA5567760	PRJEB32183	Bos taurus	Embryonic Gonadal Ridge	Testis	Testis	Male Reproductive System	Male Reproductive System	Male	Charolais	Charolais	Illumina HiSeq 2500	39 days	2019-09-03	Charolais	Male	Male	Stage2
SAMEA5567761	PRJEB32183	Bos taurus	Embryonic Gonadal Ridge	Testis	Testis	Male Reproductive System	Male Reproductive System	Male	Charolais	Charolais	Illumina HiSeq 2500	39 days	2019-09-03	Charolais	Male	Male	Stage2
SAMEA5567765	PRJEB32183	Bos taurus	Embryonic Gonadal Ridge	Testis	Testis	Male Reproductive System	Male Reproductive System	Male	Charolais	Charolais	Illumina HiSeq 2500	43 days	2019-09-03	Charolais	Male	Male	Stage2
SAMEA5702876	PRJEB32956	Bos taurus	Blood	Blood	Blood	Immune System	Immune System	Female	Holstein	Holstein	Illumina HiSeq 2000	7 months	2019-12-16	Holstein	Female	Female	Stage3
SAMEA5702879	PRJEB32956	Bos taurus	Blood	Blood	Blood	Immune System	Immune System	Female	Holstein	Holstein	Illumina HiSeq 2000	6 months	2019-12-16	Holstein	Female	Female	Stage3
SAMEA5702885	PRJEB32956	Bos taurus	Blood	Blood	Blood	Immune System	Immune System	Female	Holstein	Holstein	Illumina HiSeq 2000	8 months	2019-12-16	Holstein	Female	Female	Stage3
SAMEA5702886	PRJEB32956	Bos taurus	Blood	Blood	Blood	Immune System	Immune System	Female	Holstein	Holstein	Illumina HiSeq 2000	8 months	2019-12-16	Holstein	Female	Female	Stage3
SAMEA5702887	PRJEB32956	Bos taurus	Blood	Blood	Blood	Immune System	Immune System	Female	Holstein	Holstein	Illumina HiSeq 2000	8 months	2019-12-16	Holstein	Female	Female	Unknown
SAMEA5702888	PRJEB32956	Bos taurus	Blood	Blood	Blood	Immune System	Immune System	Female	Holstein	Holstein	Illumina HiSeq 2000	8 months	2019-12-16	Holstein	Female	Female	Stage3
SAMEA5702897	PRJEB32956	Bos taurus	Blood	Blood	Blood	Immune System	Immune System	Female	Holstein	Holstein	Illumina HiSeq 2000	6 months	2019-12-16	Holstein	Female	Female	Unknown
SAMEA5702898	PRJEB32956	Bos taurus	Blood	Blood	Blood	Immune System	Immune System	Female	Holstein	Holstein	Illumina HiSeq 2000	6 months	2019-12-16	Holstein	Female	Female	Stage3
SAMEA5847514	PRJEB33849	Bos taurus	Liver	Liver	Liver	Liver	Liver	Female	Holstein	Holstein	Illumina HiSeq 2500	Adult	2020-03-03	Holstein	Female	Female	Stage5
SAMEA5847515	PRJEB33849	Bos taurus	Liver	Liver	Liver	Liver	Liver	Female	Holstein	Holstein	Illumina HiSeq 2500	Adult	2020-03-03	Holstein	Female	Female	Stage5
SAMEA5847516	PRJEB33849	Bos taurus	Liver	Liver	Liver	Liver	Liver	Female	Holstein	Holstein	Illumina HiSeq 2500	Adult	2020-03-03	Holstein	Female	Female	Stage5
SAMEA5847517	PRJEB33849	Bos taurus	Liver	Liver	Liver	Liver	Liver	Female	Holstein	Holstein	Illumina HiSeq 2500	Adult	2020-03-03	Holstein	Female	Female	Stage5
SAMEA5847518	PRJEB33849	Bos taurus	Liver	Liver	Liver	Liver	Liver	Female	Holstein	Holstein	Illumina HiSeq 2500	Adult	2020-03-03	Holstein	Female	Female	Stage5
SAMEA5847519	PRJEB33849	Bos taurus	Liver	Liver	Liver	Liver	Liver	Female	Holstein	Holstein	Illumina HiSeq 2500	Adult	2020-03-03	Holstein	Female	Female	Stage5
SAMEA5847520	PRJEB33849	Bos taurus	Liver	Liver	Liver	Liver	Liver	Female	Holstein	Holstein	Illumina HiSeq 2500	Adult	2020-03-03	Holstein	Female	Female	Stage5
SAMEA5847521	PRJEB33849	Bos taurus	Liver	Liver	Liver	Liver	Liver	Female	Holstein	Holstein	Illumina HiSeq 2500	Adult	2020-03-03	Holstein	Female	Female	Stage5
SAMEA5847522	PRJEB33849	Bos taurus	Liver	Liver	Liver	Liver	Liver	Female	Holstein	Holstein	Illumina HiSeq 2500	Adult	2020-03-03	Holstein	Female	Female	Stage5
SAMEA5847523	PRJEB33849	Bos taurus	Liver	Liver	Liver	Liver	Liver	Female	Holstein	Holstein	Illumina HiSeq 2500	Adult	2020-03-03	Holstein	Female	Female	Stage5
SAMEA5847524	PRJEB33849	Bos taurus	Liver	Liver	Liver	Liver	Liver	Female	Holstein	Holstein	Illumina HiSeq 2500	Adult	2020-03-03	Holstein	Female	Female	Stage5
SAMEA5847525	PRJEB33849	Bos taurus	Liver	Liver	Liver	Liver	Liver	Female	Holstein	Holstein	Illumina HiSeq 2500	Adult	2020-03-03	Holstein	Female	Female	Stage5
SAMEA5847526	PRJEB33849	Bos taurus	Liver	Liver	Liver	Liver	Liver	Female	Holstein	Holstein	Illumina HiSeq 2500	Adult	2020-03-03	Holstein	Female	Female	Stage5
SAMEA5847527	PRJEB33849	Bos taurus	Liver	Liver	Liver	Liver	Liver	Female	Holstein	Holstein	Illumina HiSeq 2500	Adult	2020-03-03	Holstein	Female	Female	Stage5
SAMEA5847528	PRJEB33849	Bos taurus	Liver	Liver	Liver	Liver	Liver	Female	Holstein	Holstein	Illumina HiSeq 2500	Adult	2020-03-03	Holstein	Female	Female	Stage5
SAMEA5847529	PRJEB33849	Bos taurus	Liver	Liver	Liver	Liver	Liver	Female	Holstein	Holstein	Illumina HiSeq 2500	Adult	2020-03-03	Holstein	Female	Female	Stage5
SAMEA5847530	PRJEB33849	Bos taurus	Liver	Liver	Liver	Liver	Liver	Female	Holstein	Holstein	Illumina HiSeq 2500	Adult	2020-03-03	Holstein	Female	Female	Stage5
SAMEA5847531	PRJEB33849	Bos taurus	Liver	Liver	Liver	Liver	Liver	Female	Holstein	Holstein	Illumina HiSeq 2500	Adult	2020-03-03	Holstein	Female	Female	Stage5
SAMEA5847532	PRJEB33849	Bos taurus	Liver	Liver	Liver	Liver	Liver	Female	Holstein	Holstein	Illumina HiSeq 2500	Adult	2020-03-03	Holstein	Female	Female	Stage5
SAMEA5847533	PRJEB33849	Bos taurus	Liver	Liver	Liver	Liver	Liver	Female	Holstein	Holstein	Illumina HiSeq 2500	Adult	2020-03-03	Holstein	Female	Female	Stage5
SAMEA5847534	PRJEB33849	Bos taurus	Liver	Liver	Liver	Liver	Liver	Female	Holstein	Holstein	Illumina HiSeq 2500	Adult	2020-03-03	Holstein	Female	Female	Stage5
SAMEA5847535	PRJEB33849	Bos taurus	Liver	Liver	Liver	Liver	Liver	Female	Holstein	Holstein	Illumina HiSeq 2500	Adult	2020-03-03	Holstein	Female	Female	Stage5
SAMEA5847536	PRJEB33849	Bos taurus	Liver	Liver	Liver	Liver	Liver	Female	Holstein	Holstein	Illumina HiSeq 2500	Adult	2020-03-03	Holstein	Female	Female	Stage5
SAMEA5847537	PRJEB33849	Bos taurus	Liver	Liver	Liver	Liver	Liver	Female	Holstein	Holstein	Illumina HiSeq 2500	Adult	2020-03-03	Holstein	Female	Female	Stage5
SAMEA5847538	PRJEB33849	Bos taurus	Liver	Liver	Liver	Liver	Liver	Female	Holstein	Holstein	Illumina HiSeq 2500	Adult	2020-03-03	Holstein	Female	Female	Stage5
SAMEA5847539	PRJEB33849	Bos taurus	Liver	Liver	Liver	Liver	Liver	Female	Holstein	Holstein	Illumina HiSeq 2500	Adult	2020-03-03	Holstein	Female	Female	Stage5
SAMEA5847540	PRJEB33849	Bos taurus	Liver	Liver	Liver	Liver	Liver	Female	Holstein	Holstein	Illumina HiSeq 2500	Adult	2020-03-03	Holstein	Female	Female	Stage5
SAMEA5847541	PRJEB33849	Bos taurus	Liver	Liver	Liver	Liver	Liver	Female	Holstein	Holstein	Illumina HiSeq 2500	Adult	2020-03-03	Holstein	Female	Female	Stage5
SAMEA5847542	PRJEB33849	Bos taurus	Liver	Liver	Liver	Liver	Liver	Female	Holstein	Holstein	Illumina HiSeq 2500	Adult	2020-03-03	Holstein	Female	Female	Stage5
SAMEA5847543	PRJEB33849	Bos taurus	Liver	Liver	Liver	Liver	Liver	Female	Holstein	Holstein	Illumina HiSeq 2500	Adult	2020-03-03	Holstein	Female	Female	Stage5
SAMEA5847544	PRJEB33849	Bos taurus	Liver	Liver	Liver	Liver	Liver	Female	Holstein	Holstein	Illumina HiSeq 2500	Adult	2020-03-03	Holstein	Female	Female	Stage5
SAMEA5847545	PRJEB33849	Bos taurus	Liver	Liver	Liver	Liver	Liver	Female	Holstein	Holstein	Illumina HiSeq 2500	Adult	2020-03-03	Holstein	Female	Female	Stage5
SAMEA5847546	PRJEB33849	Bos taurus	Liver	Liver	Liver	Liver	Liver	Female	Holstein	Holstein	Illumina HiSeq 2500	Adult	2020-03-03	Holstein	Female	Female	Stage5
SAMEA5847547	PRJEB33849	Bos taurus	Liver	Liver	Liver	Liver	Liver	Female	Holstein	Holstein	Illumina HiSeq 2500	Adult	2020-03-03	Holstein	Female	Female	Stage5
SAMEA5847548	PRJEB33849	Bos taurus	Liver	Liver	Liver	Liver	Liver	Female	Holstein	Holstein	Illumina HiSeq 2500	Adult	2020-03-03	Holstein	Female	Female	Stage5
SAMEA5847549	PRJEB33849	Bos taurus	Liver	Liver	Liver	Liver	Liver	Female	Holstein	Holstein	Illumina HiSeq 2500	Adult	2020-03-03	Holstein	Female	Female	Stage5
SAMEA5847551	PRJEB33849	Bos taurus	Liver	Liver	Liver	Liver	Liver	Female	Holstein	Holstein	Illumina HiSeq 2500	Adult	2020-03-03	Holstein	Female	Female	Stage5
SAMEA5847552	PRJEB33849	Bos taurus	Liver	Liver	Liver	Liver	Liver	Female	Holstein	Holstein	Illumina HiSeq 2500	Adult	2020-03-03	Holstein	Female	Female	Stage5
SAMEA5847553	PRJEB33849	Bos taurus	Liver	Liver	Liver	Liver	Liver	Female	Holstein	Holstein	Illumina HiSeq 2500	Adult	2020-03-03	Holstein	Female	Female	Stage5
SAMEA5847554	PRJEB33849	Bos taurus	Liver	Liver	Liver	Liver	Liver	Female	Holstein	Holstein	Illumina HiSeq 2500	Adult	2020-03-03	Holstein	Female	Female	Stage5
SAMEA5847555	PRJEB33849	Bos taurus	Liver	Liver	Liver	Liver	Liver	Female	Holstein	Holstein	Illumina HiSeq 2500	Adult	2020-03-03	Holstein	Female	Female	Stage5
SAMEA6031866	PRJEB34570	Bos taurus	Jejunal Mucosa	Jejunum	Jejunum	Digestive System	Digestive System	Unknown	Unknown	Unknown	Illumina HiSeq 2500	18 years	2019-10-22	Holstein	Male	Male	Stage5
SAMEA6031869	PRJEB34570	Bos taurus	Jejunal Mucosa	Jejunum	Jejunum	Digestive System	Digestive System	Unknown	Unknown	Unknown	Illumina HiSeq 2500	18 years	2019-10-22	Holstein	Male	Male	Stage5
SAMEA6031870	PRJEB34570	Bos taurus	Jejunal Mucosa	Jejunum	Jejunum	Digestive System	Digestive System	Unknown	Unknown	Unknown	Illumina HiSeq 2500	18 years	2019-10-22	Holstein	Male	Male	Stage5
SAMEA6031871	PRJEB34570	Bos taurus	Liver	Liver	Liver	Liver	Liver	Unknown	Unknown	Unknown	Illumina HiSeq 2500	18 years	2019-10-22	Holstein	Male	Male	Stage5
SAMEA6031872	PRJEB34570	Bos taurus	Liver	Liver	Liver	Liver	Liver	Unknown	Unknown	Unknown	Illumina HiSeq 2500	3.5 years	2019-10-22	Holstein	Female	Female	Stage5
SAMEA6031873	PRJEB34570	Bos taurus	Rumen	Rumen	Rumen	Digestive System	Digestive System	Unknown	Unknown	Unknown	Illumina HiSeq 2500	18 years	2019-10-22	Charolais	Male	Male	Stage5
SAMEA6031876	PRJEB34570	Bos taurus	Liver	Liver	Liver	Liver	Liver	Unknown	Unknown	Unknown	Illumina HiSeq 2500	3.5 years	2019-10-22	Holstein	Female	Female	Stage5
SAMEA6031877	PRJEB34570	Bos taurus	Rumen	Rumen	Rumen	Digestive System	Digestive System	Unknown	Unknown	Unknown	Illumina HiSeq 2500	3.5 years	2019-10-22	Holstein	Female	Female	Stage5
SAMEA6031879	PRJEB34570	Bos taurus	Rumen	Rumen	Rumen	Digestive System	Digestive System	Unknown	Unknown	Unknown	Illumina HiSeq 2500	3.5 years	2019-10-22	Holstein	Female	Female	Stage5
SAMEA6031880	PRJEB34570	Bos taurus	Rumen	Rumen	Rumen	Digestive System	Digestive System	Unknown	Unknown	Unknown	Illumina HiSeq 2500	18 years	2019-10-22	Holstein	Male	Male	Stage5
SAMEA6031881	PRJEB34570	Bos taurus	Rumen	Rumen	Rumen	Digestive System	Digestive System	Unknown	Unknown	Unknown	Illumina HiSeq 2500	3.5 years	2019-10-22	Holstein	Female	Female	Stage5
SAMEA6031882	PRJEB34570	Bos taurus	Rumen	Rumen	Rumen	Digestive System	Digestive System	Unknown	Unknown	Unknown	Illumina HiSeq 2500	18 years	2019-10-22	Holstein	Male	Male	Stage5
SAMEA6031883	PRJEB34570	Bos taurus	Jejunal Mucosa	Jejunum	Jejunum	Digestive System	Digestive System	Unknown	Unknown	Unknown	Illumina HiSeq 2500	3.5 years	2019-10-22	Holstein	Female	Female	Stage5
SAMEA6031885	PRJEB34570	Bos taurus	Jejunal Mucosa	Jejunum	Jejunum	Digestive System	Digestive System	Unknown	Unknown	Unknown	Illumina HiSeq 2500	3.5 years	2019-10-22	Holstein	Female	Female	Stage5
SAMEA6031887	PRJEB34570	Bos taurus	Rumen	Rumen	Rumen	Digestive System	Digestive System	Unknown	Unknown	Unknown	Illumina HiSeq 2500	3.5 years	2019-10-22	Holstein	Female	Female	Stage5
SAMEA6031888	PRJEB34570	Bos taurus	Jejunal Mucosa	Jejunum	Jejunum	Digestive System	Digestive System	Unknown	Unknown	Unknown	Illumina HiSeq 2500	18 years	2019-10-22	Holstein	Male	Male	Stage5
SAMEA6031894	PRJEB34570	Bos taurus	Liver	Liver	Liver	Liver	Liver	Unknown	Unknown	Unknown	Illumina HiSeq 2500	3.5 years	2019-10-22	Holstein	Female	Female	Stage5
SAMEA6031895	PRJEB34570	Bos taurus	Liver	Liver	Liver	Liver	Liver	Unknown	Unknown	Unknown	Illumina HiSeq 2500	3.5 years	2019-10-22	Holstein	Female	Female	Stage5
SAMEA6031896	PRJEB34570	Bos taurus	Jejunal Mucosa	Jejunum	Jejunum	Digestive System	Digestive System	Unknown	Unknown	Unknown	Illumina HiSeq 2500	3.5 years	2019-10-22	Holstein	Female	Female	Stage5
SAMEA6031897	PRJEB34570	Bos taurus	Liver	Liver	Liver	Liver	Liver	Unknown	Unknown	Unknown	Illumina HiSeq 2500	3.5 years	2019-10-22	Holstein	Female	Female	Stage5
SAMEA6031900	PRJEB34570	Bos taurus	Jejunal Mucosa	Jejunum	Jejunum	Digestive System	Digestive System	Unknown	Unknown	Unknown	Illumina HiSeq 2500	3.5 years	2019-10-22	Holstein	Female	Female	Stage5
SAMEA6031901	PRJEB34570	Bos taurus	Jejunal Mucosa	Jejunum	Jejunum	Digestive System	Digestive System	Unknown	Unknown	Unknown	Illumina HiSeq 2500	3.5 years	2019-10-22	Holstein	Female	Female	Stage5
SAMEA6031902	PRJEB34570	Bos taurus	Jejunal Mucosa	Jejunum	Jejunum	Digestive System	Digestive System	Unknown	Unknown	Unknown	Illumina HiSeq 2500	3.5 years	2019-10-22	Holstein	Female	Female	Stage5
SAMEA6031905	PRJEB34570	Bos taurus	Rumen	Rumen	Rumen	Digestive System	Digestive System	Unknown	Unknown	Unknown	Illumina HiSeq 2500	3.5 years	2019-10-22	Holstein	Female	Female	Stage5
SAMEA6031906	PRJEB34570	Bos taurus	Jejunal Mucosa	Jejunum	Jejunum	Digestive System	Digestive System	Unknown	Unknown	Unknown	Illumina HiSeq 2500	3.5 years	2019-10-22	Holstein	Female	Female	Stage5
SAMEA6031908	PRJEB34570	Bos taurus	Liver	Liver	Liver	Liver	Liver	Unknown	Charolais x Holstein	Charolais Cross	Illumina HiSeq 2500	3.5 years	2019-10-22	Charolais Cross	Female	Female	Stage5
SAMEA6031909	PRJEB34570	Bos taurus	Liver	Liver	Liver	Liver	Liver	Unknown	Unknown	Unknown	Illumina HiSeq 2500	3.5 years	2019-10-22	Holstein	Female	Female	Stage5
SAMEA6031910	PRJEB34570	Bos taurus	Jejunal Mucosa	Jejunum	Jejunum	Digestive System	Digestive System	Unknown	Unknown	Unknown	Illumina HiSeq 2500	3.5 years	2019-10-22	Holstein	Female	Female	Stage5
SAMEA6031911	PRJEB34570	Bos taurus	Jejunal Mucosa	Jejunum	Jejunum	Digestive System	Digestive System	Unknown	Unknown	Unknown	Illumina HiSeq 2500	3.5 years	2019-10-22	Holstein	Female	Female	Stage5
SAMEA6031914	PRJEB34570	Bos taurus	Jejunal Mucosa	Jejunum	Jejunum	Digestive System	Digestive System	Unknown	Unknown	Unknown	Illumina HiSeq 2500	3.5 years	2019-10-22	Holstein	Female	Female	Stage5
SAMEA6031915	PRJEB34570	Bos taurus	Jejunal Mucosa	Jejunum	Jejunum	Digestive System	Digestive System	Unknown	Unknown	Unknown	Illumina HiSeq 2500	18 years	2019-10-22	Charolais	Male	Male	Stage5
SAMEA6031916	PRJEB34570	Bos taurus	Liver	Liver	Liver	Liver	Liver	Unknown	Unknown	Unknown	Illumina HiSeq 2500	18 years	2019-10-22	Holstein	Male	Male	Stage5
SAMEA6031917	PRJEB34570	Bos taurus	Rumen	Rumen	Rumen	Digestive System	Digestive System	Unknown	Unknown	Unknown	Illumina HiSeq 2500	18 years	2019-10-22	Holstein	Male	Male	Stage5
SAMEA6031920	PRJEB34570	Bos taurus	Liver	Liver	Liver	Liver	Liver	Unknown	Unknown	Unknown	Illumina HiSeq 2500	3.5 years	2019-10-22	Holstein	Female	Female	Stage5
SAMEA6031923	PRJEB34570	Bos taurus	Liver	Liver	Liver	Liver	Liver	Unknown	Unknown	Unknown	Illumina HiSeq 2500	3.5 years	2019-10-22	Holstein	Female	Female	Stage5
SAMEA6031924	PRJEB34570	Bos taurus	Liver	Liver	Liver	Liver	Liver	Unknown	Unknown	Unknown	Illumina HiSeq 2500	18 years	2019-10-22	Holstein	Male	Male	Stage5
SAMEA6031925	PRJEB34570	Bos taurus	Liver	Liver	Liver	Liver	Liver	Unknown	Charolais x Holstein	Charolais Cross	Illumina HiSeq 2500	18 years	2019-10-22	Charolais Cross	Male	Male	Stage5
SAMEA6031926	PRJEB34570	Bos taurus	Liver	Liver	Liver	Liver	Liver	Unknown	Unknown	Unknown	Illumina HiSeq 2500	18 years	2019-10-22	Holstein	Male	Male	Stage5
SAMEA6031927	PRJEB34570	Bos taurus	Jejunal Mucosa	Jejunum	Jejunum	Digestive System	Digestive System	Unknown	Unknown	Unknown	Illumina HiSeq 2500	18 years	2019-10-22	Charolais	Male	Male	Stage5
SAMEA6031929	PRJEB34570	Bos taurus	Liver	Liver	Liver	Liver	Liver	Unknown	Charolais x Holstein	Charolais Cross	Illumina HiSeq 2500	3.5 years	2019-10-22	Charolais Cross	Female	Female	Stage5
SAMEA6031932	PRJEB34570	Bos taurus	Jejunal Mucosa	Jejunum	Jejunum	Digestive System	Digestive System	Unknown	Unknown	Unknown	Illumina HiSeq 2500	3.5 years	2019-10-22	Holstein	Female	Female	Stage5
SAMEA6031933	PRJEB34570	Bos taurus	Rumen	Rumen	Rumen	Digestive System	Digestive System	Unknown	Unknown	Unknown	Illumina HiSeq 2500	3.5 years	2019-10-22	Holstein	Female	Female	Stage5
SAMEA6031935	PRJEB34570	Bos taurus	Rumen	Rumen	Rumen	Digestive System	Digestive System	Unknown	Unknown	Unknown	Illumina HiSeq 2500	18 years	2019-10-22	Holstein	Male	Female	Stage5
SAMEA6031936	PRJEB34570	Bos taurus	Jejunal Mucosa	Jejunum	Jejunum	Digestive System	Digestive System	Unknown	Unknown	Unknown	Illumina HiSeq 2500	3.5 years	2019-10-22	Holstein	Female	Female	Stage5
SAMEA6031937	PRJEB34570	Bos taurus	Jejunal Mucosa	Jejunum	Jejunum	Digestive System	Digestive System	Unknown	Unknown	Unknown	Illumina HiSeq 2500	18 years	2019-10-22	Holstein	Male	Male	Stage5
SAMEA6031938	PRJEB34570	Bos taurus	Rumen	Rumen	Rumen	Digestive System	Digestive System	Unknown	Unknown	Unknown	Illumina HiSeq 2500	3.5 years	2019-10-22	Holstein	Female	Female	Stage5
SAMEA6031942	PRJEB34570	Bos taurus	Liver	Liver	Liver	Liver	Liver	Unknown	Unknown	Unknown	Illumina HiSeq 2500	3.5 years	2019-10-22	Holstein	Female	Female	Stage5
SAMEA6031943	PRJEB34570	Bos taurus	Rumen	Rumen	Rumen	Digestive System	Digestive System	Unknown	Unknown	Unknown	Illumina HiSeq 2500	18 years	2019-10-22	Charolais	Unknown	Unknown	Unknown
SAMEA6031944	PRJEB34570	Bos taurus	Liver	Liver	Liver	Liver	Liver	Unknown	Charolais x Holstein	Charolais Cross	Illumina HiSeq 2500	18 years	2019-10-22	Charolais Cross	Male	Male	Stage5
SAMEA6031946	PRJEB34570	Bos taurus	Rumen	Rumen	Rumen	Digestive System	Digestive System	Unknown	Unknown	Unknown	Illumina HiSeq 2500	18 years	2019-10-22	Holstein	Unknown	Female	Stage5
SAMEA6031947	PRJEB34570	Bos taurus	Liver	Liver	Liver	Liver	Liver	Unknown	Unknown	Unknown	Illumina HiSeq 2500	18 years	2019-10-22	Holstein	Male	Male	Stage5
SAMEA6031950	PRJEB34570	Bos taurus	Rumen	Rumen	Rumen	Digestive System	Digestive System	Unknown	Unknown	Unknown	Illumina HiSeq 2500	3.5 years	2019-10-22	Holstein	Female	Female	Stage5
SAMEA6031951	PRJEB34570	Bos taurus	Liver	Liver	Liver	Liver	Liver	Unknown	Unknown	Unknown	Illumina HiSeq 2500	18 years	2019-10-22	Holstein	Male	Male	Stage5
SAMEA6031953	PRJEB34570	Bos taurus	Rumen	Rumen	Rumen	Digestive System	Digestive System	Unknown	Unknown	Unknown	Illumina HiSeq 2500	3.5 years	2019-10-22	Holstein	Female	Female	Stage5
SAMEA6031955	PRJEB34570	Bos taurus	Rumen	Rumen	Rumen	Digestive System	Digestive System	Unknown	Unknown	Unknown	Illumina HiSeq 2500	3.5 years	2019-10-22	Holstein	Female	Female	Stage5
SAMEA6031959	PRJEB34570	Bos taurus	Liver	Liver	Liver	Liver	Liver	Unknown	Unknown	Unknown	Illumina HiSeq 2500	3.5 years	2019-10-22	Holstein	Female	Female	Stage5
SAMEA6031960	PRJEB34570	Bos taurus	Rumen	Rumen	Rumen	Digestive System	Digestive System	Unknown	Unknown	Unknown	Illumina HiSeq 2500	3.5 years	2019-10-22	Holstein	Female	Female	Stage5
SAMEA6031961	PRJEB34570	Bos taurus	Liver	Liver	Liver	Liver	Liver	Unknown	Unknown	Unknown	Illumina HiSeq 2500	18 years	2019-10-22	Holstein	Male	Male	Stage5
SAMEA6031962	PRJEB34570	Bos taurus	Liver	Liver	Liver	Liver	Liver	Unknown	Unknown	Unknown	Illumina HiSeq 2500	18 years	2019-10-22	Holstein	Male	Male	Stage5
SAMEA6031965	PRJEB34570	Bos taurus	Liver	Liver	Liver	Liver	Liver	Unknown	Unknown	Unknown	Illumina HiSeq 2500	18 years	2019-10-22	Holstein	Male	Male	Stage5
SAMEA6031966	PRJEB34570	Bos taurus	Rumen	Rumen	Rumen	Digestive System	Digestive System	Unknown	Unknown	Unknown	Illumina HiSeq 2500	3.5 years	2019-10-22	Holstein	Female	Female	Stage5
SAMEA6031968	PRJEB34570	Bos taurus	Jejunal Mucosa	Jejunum	Jejunum	Digestive System	Digestive System	Unknown	Unknown	Unknown	Illumina HiSeq 2500	3.5 years	2019-10-22	Holstein	Female	Female	Stage5
SAMEA6031970	PRJEB34570	Bos taurus	Jejunal Mucosa	Jejunum	Jejunum	Digestive System	Digestive System	Unknown	Unknown	Unknown	Illumina HiSeq 2500	3.5 years	2019-10-22	Holstein	Female	Female	Stage5
SAMEA6031971	PRJEB34570	Bos taurus	Jejunal Mucosa	Jejunum	Jejunum	Digestive System	Digestive System	Unknown	Unknown	Unknown	Illumina HiSeq 2500	18 years	2019-10-22	Charolais	Male	Male	Stage5
SAMEA6031973	PRJEB34570	Bos taurus	Jejunal Mucosa	Jejunum	Jejunum	Digestive System	Digestive System	Unknown	Unknown	Unknown	Illumina HiSeq 2500	3.5 years	2019-10-22	Holstein	Female	Female	Stage5
SAMEA6031974	PRJEB34570	Bos taurus	Liver	Liver	Liver	Liver	Liver	Unknown	Unknown	Unknown	Illumina HiSeq 2500	3.5 years	2019-10-22	Holstein	Female	Female	Stage5
SAMEA6031975	PRJEB34570	Bos taurus	Jejunal Mucosa	Jejunum	Jejunum	Digestive System	Digestive System	Unknown	Unknown	Unknown	Illumina HiSeq 2500	18 years	2019-10-22	Holstein	Male	Male	Stage5
SAMEA6031977	PRJEB34570	Bos taurus	Rumen	Rumen	Rumen	Digestive System	Digestive System	Unknown	Unknown	Unknown	Illumina HiSeq 2500	3.5 years	2019-10-22	Holstein	Female	Female	Stage5
SAMEA6031979	PRJEB34570	Bos taurus	Liver	Liver	Liver	Liver	Liver	Unknown	Unknown	Unknown	Illumina HiSeq 2500	3.5 years	2019-10-22	Holstein	Female	Female	Stage5
SAMEA6031980	PRJEB34570	Bos taurus	Liver	Liver	Liver	Liver	Liver	Unknown	Unknown	Unknown	Illumina HiSeq 2500	18 years	2019-10-22	Holstein	Male	Male	Stage5
SAMEA6031982	PRJEB34570	Bos taurus	Rumen	Rumen	Rumen	Digestive System	Digestive System	Unknown	Unknown	Unknown	Illumina HiSeq 2500	18 years	2019-10-22	Holstein	Male	Female	Stage5
SAMEA6031983	PRJEB34570	Bos taurus	Liver	Liver	Liver	Liver	Liver	Unknown	Unknown	Unknown	Illumina HiSeq 2500	3.5 years	2019-10-22	Holstein	Female	Female	Stage5
SAMEA6031984	PRJEB34570	Bos taurus	Rumen	Rumen	Rumen	Digestive System	Digestive System	Unknown	Unknown	Unknown	Illumina HiSeq 2500	3.5 years	2019-10-22	Holstein	Female	Female	Stage5
SAMEA6031985	PRJEB34570	Bos taurus	Rumen	Rumen	Rumen	Digestive System	Digestive System	Unknown	Unknown	Unknown	Illumina HiSeq 2500	18 years	2019-10-22	Holstein	Male	Male	Stage5
SAMEA6031986	PRJEB34570	Bos taurus	Rumen	Rumen	Rumen	Digestive System	Digestive System	Unknown	Unknown	Unknown	Illumina HiSeq 2500	18 years	2019-10-22	Holstein	Male	Male	Stage5
SAMEA6031989	PRJEB34570	Bos taurus	Liver	Liver	Liver	Liver	Liver	Unknown	Unknown	Unknown	Illumina HiSeq 2500	3.5 years	2019-10-22	Holstein	Female	Female	Stage5
SAMEA6031990	PRJEB34570	Bos taurus	Liver	Liver	Liver	Liver	Liver	Unknown	Unknown	Unknown	Illumina HiSeq 2500	3.5 years	2019-10-22	Holstein	Female	Female	Stage5
SAMEA6031991	PRJEB34570	Bos taurus	Liver	Liver	Liver	Liver	Liver	Unknown	Unknown	Unknown	Illumina HiSeq 2500	3.5 years	2019-10-22	Holstein	Female	Female	Stage5
SAMEA6031994	PRJEB34570	Bos taurus	Liver	Liver	Liver	Liver	Liver	Unknown	Unknown	Unknown	Illumina HiSeq 2500	18 years	2019-10-22	Holstein	Male	Male	Stage5
SAMEA6031996	PRJEB34570	Bos taurus	Liver	Liver	Liver	Liver	Liver	Unknown	Unknown	Unknown	Illumina HiSeq 2500	3.5 years	2019-10-22	Holstein	Female	Female	Stage5
SAMEA6031998	PRJEB34570	Bos taurus	Rumen	Rumen	Rumen	Digestive System	Digestive System	Unknown	Unknown	Unknown	Illumina HiSeq 2500	3.5 years	2019-10-22	Holstein	Female	Female	Stage5
SAMEA6032003	PRJEB34570	Bos taurus	Jejunal Mucosa	Jejunum	Jejunum	Digestive System	Digestive System	Unknown	Unknown	Unknown	Illumina HiSeq 2500	18 years	2019-10-22	Holstein	Male	Male	Stage5
SAMEA6032006	PRJEB34570	Bos taurus	Rumen	Rumen	Rumen	Digestive System	Digestive System	Unknown	Unknown	Unknown	Illumina HiSeq 2500	18 years	2019-10-22	Holstein	Male	Male	Stage5
SAMEA6032008	PRJEB34570	Bos taurus	Jejunal Mucosa	Jejunum	Jejunum	Digestive System	Digestive System	Unknown	Unknown	Unknown	Illumina HiSeq 2500	3.5 years	2019-10-22	Holstein	Female	Female	Stage5
SAMEA6032009	PRJEB34570	Bos taurus	Rumen	Rumen	Rumen	Digestive System	Digestive System	Unknown	Unknown	Unknown	Illumina HiSeq 2500	3.5 years	2019-10-22	Holstein	Female	Female	Stage5
SAMEA6032010	PRJEB34570	Bos taurus	Liver	Liver	Liver	Liver	Liver	Unknown	Charolais x Holstein	Charolais Cross	Illumina HiSeq 2500	18 years	2019-10-22	Charolais Cross	Unknown	Female	Stage5
SAMEA6032011	PRJEB34570	Bos taurus	Liver	Liver	Liver	Liver	Liver	Unknown	Unknown	Unknown	Illumina HiSeq 2500	18 years	2019-10-22	Holstein	Male	Male	Stage5
SAMEA6032013	PRJEB34570	Bos taurus	Jejunal Mucosa	Jejunum	Jejunum	Digestive System	Digestive System	Unknown	Unknown	Unknown	Illumina HiSeq 2500	3.5 years	2019-10-22	Holstein	Female	Female	Stage5
SAMEA6032016	PRJEB34570	Bos taurus	Rumen	Rumen	Rumen	Digestive System	Digestive System	Unknown	Unknown	Unknown	Illumina HiSeq 2500	18 years	2019-10-22	Holstein	Male	Male	Stage5
SAMEA6032018	PRJEB34570	Bos taurus	Liver	Liver	Liver	Liver	Liver	Unknown	Unknown	Unknown	Illumina HiSeq 2500	3.5 years	2019-10-22	Holstein	Female	Female	Stage5
SAMEA6032020	PRJEB34570	Bos taurus	Jejunal Mucosa	Jejunum	Jejunum	Digestive System	Digestive System	Unknown	Unknown	Unknown	Illumina HiSeq 2500	3.5 years	2019-10-22	Holstein	Female	Female	Stage5
SAMEA6032027	PRJEB34570	Bos taurus	Liver	Liver	Liver	Liver	Liver	Unknown	Unknown	Unknown	Illumina HiSeq 2500	18 years	2019-10-22	Holstein	Male	Male	Stage5
SAMEA6032028	PRJEB34570	Bos taurus	Jejunal Mucosa	Jejunum	Jejunum	Digestive System	Digestive System	Unknown	Unknown	Unknown	Illumina HiSeq 2500	3.5 years	2019-10-22	Holstein	Female	Female	Stage5
SAMEA6032030	PRJEB34570	Bos taurus	Jejunal Mucosa	Jejunum	Jejunum	Digestive System	Digestive System	Unknown	Unknown	Unknown	Illumina HiSeq 2500	3.5 years	2019-10-22	Holstein	Female	Female	Stage5
SAMEA6032031	PRJEB34570	Bos taurus	Liver	Liver	Liver	Liver	Liver	Unknown	Charolais x Holstein	Charolais Cross	Illumina HiSeq 2500	3.5 years	2019-10-22	Charolais Cross	Female	Female	Stage5
SAMEA6032032	PRJEB34570	Bos taurus	Rumen	Rumen	Rumen	Digestive System	Digestive System	Unknown	Unknown	Unknown	Illumina HiSeq 2500	18 years	2019-10-22	Holstein	Male	Male	Stage5
SAMEA6032034	PRJEB34570	Bos taurus	Jejunal Mucosa	Jejunum	Jejunum	Digestive System	Digestive System	Unknown	Unknown	Unknown	Illumina HiSeq 2500	18 years	2019-10-22	Holstein	Male	Male	Stage5
SAMEA6032035	PRJEB34570	Bos taurus	Rumen	Rumen	Rumen	Digestive System	Digestive System	Unknown	Unknown	Unknown	Illumina HiSeq 2500	3.5 years	2019-10-22	Holstein	Female	Female	Stage5
SAMEA6032038	PRJEB34570	Bos taurus	Liver	Liver	Liver	Liver	Liver	Unknown	Charolais x Holstein	Charolais Cross	Illumina HiSeq 2500	3.5 years	2019-10-22	Charolais Cross	Female	Female	Stage5
SAMEA6032039	PRJEB34570	Bos taurus	Liver	Liver	Liver	Liver	Liver	Unknown	Unknown	Unknown	Illumina HiSeq 2500	18 years	2019-10-22	Holstein	Male	Male	Stage5
SAMEA6032040	PRJEB34570	Bos taurus	Rumen	Rumen	Rumen	Digestive System	Digestive System	Unknown	Unknown	Unknown	Illumina HiSeq 2500	18 years	2019-10-22	Charolais	Unknown	Unknown	Unknown
SAMEA6032042	PRJEB34570	Bos taurus	Rumen	Rumen	Rumen	Digestive System	Digestive System	Unknown	Unknown	Unknown	Illumina HiSeq 2500	18 years	2019-10-22	Holstein	Male	Male	Stage5
SAMEA6032049	PRJEB34570	Bos taurus	Jejunal Mucosa	Jejunum	Jejunum	Digestive System	Digestive System	Unknown	Unknown	Unknown	Illumina HiSeq 2500	18 years	2019-10-22	Holstein	Male	Male	Stage5
SAMEA6032053	PRJEB34570	Bos taurus	Liver	Liver	Liver	Liver	Liver	Unknown	Charolais x Holstein	Charolais Cross	Illumina HiSeq 2500	3.5 years	2019-10-22	Charolais Cross	Female	Female	Stage5
SAMEA6032055	PRJEB34570	Bos taurus	Jejunal Mucosa	Jejunum	Jejunum	Digestive System	Digestive System	Unknown	Unknown	Unknown	Illumina HiSeq 2500	18 years	2019-10-22	Holstein	Male	Male	Stage5
SAMEA6032058	PRJEB34570	Bos taurus	Jejunal Mucosa	Jejunum	Jejunum	Digestive System	Digestive System	Unknown	Unknown	Unknown	Illumina HiSeq 2500	3.5 years	2019-10-22	Holstein	Female	Female	Stage5
SAMEA6032059	PRJEB34570	Bos taurus	Jejunal Mucosa	Jejunum	Jejunum	Digestive System	Digestive System	Unknown	Unknown	Unknown	Illumina HiSeq 2500	3.5 years	2019-10-22	Holstein	Female	Female	Stage5
SAMEA6032061	PRJEB34570	Bos taurus	Jejunal Mucosa	Jejunum	Jejunum	Digestive System	Digestive System	Unknown	Unknown	Unknown	Illumina HiSeq 2500	18 years	2019-10-22	Holstein	Male	Male	Stage5
SAMEA6032062	PRJEB34570	Bos taurus	Liver	Liver	Liver	Liver	Liver	Unknown	Unknown	Unknown	Illumina HiSeq 2500	18 years	2019-10-22	Holstein	Male	Male	Stage5
SAMEA6032063	PRJEB34570	Bos taurus	Jejunal Mucosa	Jejunum	Jejunum	Digestive System	Digestive System	Unknown	Unknown	Unknown	Illumina HiSeq 2500	3.5 years	2019-10-22	Holstein	Female	Female	Stage5
SAMEA6032064	PRJEB34570	Bos taurus	Jejunal Mucosa	Jejunum	Jejunum	Digestive System	Digestive System	Unknown	Unknown	Unknown	Illumina HiSeq 2500	3.5 years	2019-10-22	Holstein	Female	Female	Stage5
SAMEA6032067	PRJEB34570	Bos taurus	Jejunal Mucosa	Jejunum	Jejunum	Digestive System	Digestive System	Unknown	Unknown	Unknown	Illumina HiSeq 2500	18 years	2019-10-22	Holstein	Male	Male	Stage5
SAMEA6032069	PRJEB34570	Bos taurus	Rumen	Rumen	Rumen	Digestive System	Digestive System	Unknown	Unknown	Unknown	Illumina HiSeq 2500	3.5 years	2019-10-22	Holstein	Female	Female	Stage5
SAMEA6032073	PRJEB34570	Bos taurus	Rumen	Rumen	Rumen	Digestive System	Digestive System	Unknown	Unknown	Unknown	Illumina HiSeq 2500	18 years	2019-10-22	Holstein	Unknown	Unknown	Unknown
SAMEA6032075	PRJEB34570	Bos taurus	Jejunal Mucosa	Jejunum	Jejunum	Digestive System	Digestive System	Unknown	Unknown	Unknown	Illumina HiSeq 2500	18 years	2019-10-22	Holstein	Male	Male	Stage5
SAMEA6032077	PRJEB34570	Bos taurus	Rumen	Rumen	Rumen	Digestive System	Digestive System	Unknown	Unknown	Unknown	Illumina HiSeq 2500	18 years	2019-10-22	Holstein	Male	Female	Stage5
SAMEA6032078	PRJEB34570	Bos taurus	Liver	Liver	Liver	Liver	Liver	Unknown	Unknown	Unknown	Illumina HiSeq 2500	18 years	2019-10-22	Holstein	Male	Male	Stage5
SAMEA6032079	PRJEB34570	Bos taurus	Jejunal Mucosa	Jejunum	Jejunum	Digestive System	Digestive System	Unknown	Unknown	Unknown	Illumina HiSeq 2500	18 years	2019-10-22	Holstein	Male	Male	Stage5
SAMEA6032080	PRJEB34570	Bos taurus	Liver	Liver	Liver	Liver	Liver	Unknown	Charolais x Holstein	Charolais Cross	Illumina HiSeq 2500	18 years	2019-10-22	Charolais Cross	Male	Male	Stage5
SAMEA6032081	PRJEB34570	Bos taurus	Rumen	Rumen	Rumen	Digestive System	Digestive System	Unknown	Unknown	Unknown	Illumina HiSeq 2500	18 years	2019-10-22	Holstein	Unknown	Unknown	Unknown
SAMEA6032082	PRJEB34570	Bos taurus	Jejunal Mucosa	Jejunum	Jejunum	Digestive System	Digestive System	Unknown	Unknown	Unknown	Illumina HiSeq 2500	18 years	2019-10-22	Holstein	Male	Male	Stage5
SAMEA6032083	PRJEB34570	Bos taurus	Rumen	Rumen	Rumen	Digestive System	Digestive System	Unknown	Unknown	Unknown	Illumina HiSeq 2500	3.5 years	2019-10-22	Holstein	Female	Female	Stage5
SAMEA6032084	PRJEB34570	Bos taurus	Rumen	Rumen	Rumen	Digestive System	Digestive System	Unknown	Unknown	Unknown	Illumina HiSeq 2500	3.5 years	2019-10-22	Holstein	Female	Female	Stage5
SAMEA6032085	PRJEB34570	Bos taurus	Rumen	Rumen	Rumen	Digestive System	Digestive System	Unknown	Unknown	Unknown	Illumina HiSeq 2500	18 years	2019-10-22	Holstein	Male	Male	Stage5
SAMEA6032086	PRJEB34570	Bos taurus	Jejunal Mucosa	Jejunum	Jejunum	Digestive System	Digestive System	Unknown	Unknown	Unknown	Illumina HiSeq 2500	18 years	2019-10-22	Holstein	Male	Male	Stage5
SAMEA6032087	PRJEB34570	Bos taurus	Jejunal Mucosa	Jejunum	Jejunum	Digestive System	Digestive System	Unknown	Unknown	Unknown	Illumina HiSeq 2500	18 years	2019-10-22	Holstein	Male	Male	Stage5
SAMEA6032088	PRJEB34570	Bos taurus	Jejunal Mucosa	Jejunum	Jejunum	Digestive System	Digestive System	Unknown	Unknown	Unknown	Illumina HiSeq 2500	18 years	2019-10-22	Holstein	Male	Male	Stage5
SAMEA6032089	PRJEB34570	Bos taurus	Liver	Liver	Liver	Liver	Liver	Unknown	Unknown	Unknown	Illumina HiSeq 2500	18 years	2019-10-22	Holstein	Male	Male	Stage5
SAMEA6032091	PRJEB34570	Bos taurus	Rumen	Rumen	Rumen	Digestive System	Digestive System	Unknown	Unknown	Unknown	Illumina HiSeq 2500	18 years	2019-10-22	Holstein	Male	Male	Stage5
SAMEA6032092	PRJEB34570	Bos taurus	Liver	Liver	Liver	Liver	Liver	Unknown	Unknown	Unknown	Illumina HiSeq 2500	18 years	2019-10-22	Holstein	Male	Male	Stage5
SAMEA6032093	PRJEB34570	Bos taurus	Jejunal Mucosa	Jejunum	Jejunum	Digestive System	Digestive System	Unknown	Unknown	Unknown	Illumina HiSeq 2500	18 years	2019-10-22	Holstein	Male	Male	Stage5
SAMEA6032095	PRJEB34570	Bos taurus	Rumen	Rumen	Rumen	Digestive System	Digestive System	Unknown	Unknown	Unknown	Illumina HiSeq 2500	3.5 years	2019-10-22	Holstein	Female	Female	Stage5
SAMEA6032096	PRJEB34570	Bos taurus	Jejunal Mucosa	Jejunum	Jejunum	Digestive System	Digestive System	Unknown	Unknown	Unknown	Illumina HiSeq 2500	18 years	2019-10-22	Holstein	Male	Male	Stage5
SAMEA6032098	PRJEB34570	Bos taurus	Jejunal Mucosa	Jejunum	Jejunum	Digestive System	Digestive System	Unknown	Unknown	Unknown	Illumina HiSeq 2500	18 years	2019-10-22	Holstein	Male	Male	Stage5
SAMEA6032099	PRJEB34570	Bos taurus	Liver	Liver	Liver	Liver	Liver	Unknown	Unknown	Unknown	Illumina HiSeq 2500	18 years	2019-10-22	Holstein	Male	Male	Stage5
SAMEA6032100	PRJEB34570	Bos taurus	Liver	Liver	Liver	Liver	Liver	Unknown	Unknown	Unknown	Illumina HiSeq 2500	18 years	2019-10-22	Charolais	Male	Male	Stage5
SAMEA6032101	PRJEB34570	Bos taurus	Rumen	Rumen	Rumen	Digestive System	Digestive System	Unknown	Unknown	Unknown	Illumina HiSeq 2500	18 years	2019-10-22	Holstein	Male	Male	Stage5
SAMEA6032102	PRJEB34570	Bos taurus	Rumen	Rumen	Rumen	Digestive System	Digestive System	Unknown	Unknown	Unknown	Illumina HiSeq 2500	3.5 years	2019-10-22	Holstein	Male	Male	Stage5
SAMEA6650837	PRJEB36894	Bos indicus	Blood	Blood	Blood	Immune System	Immune System	Female	Unknown	Unknown	Illumina NovaSeq 6000	Unknown	2023-04-18	Brahman	Female	Female	Unknown
SAMEA6650838	PRJEB36894	Bos indicus	Blood	Blood	Blood	Immune System	Immune System	Female	Unknown	Unknown	Illumina NovaSeq 6000	Unknown	2023-04-18	Brahman	Female	Female	Unknown
SAMEA6650839	PRJEB36894	Bos indicus	Blood	Blood	Blood	Immune System	Immune System	Female	Unknown	Unknown	Illumina NovaSeq 6000	Unknown	2023-04-18	Brahman	Female	Female	Unknown
SAMEA6655525	PRJEB37691	Bos taurus	Blood	Blood	Blood	Immune System	Immune System	Unknown	Unknown	Unknown	Illumina NovaSeq 6000	Unknown	2020-05-31	Holstein	Female	Female	Stage5
SAMEA6655542	PRJEB37691	Bos taurus	Blood	Blood	Blood	Immune System	Immune System	Unknown	Unknown	Unknown	Illumina NovaSeq 6000	Unknown	2020-05-31	Holstein	Female	Female	Stage5
SAMEA6655545	PRJEB37691	Bos taurus	Blood	Blood	Blood	Immune System	Immune System	Unknown	Unknown	Unknown	Illumina NovaSeq 6000	Unknown	2020-05-31	Holstein	Female	Female	Stage5
SAMEA6655577	PRJEB37691	Bos taurus	Blood	Blood	Blood	Immune System	Immune System	Unknown	Unknown	Unknown	Illumina NovaSeq 6000	Unknown	2020-05-31	Holstein	Female	Female	Stage5
SAMEA6655589	PRJEB37691	Bos taurus	Blood	Blood	Blood	Immune System	Immune System	Unknown	Unknown	Unknown	Illumina NovaSeq 6000	Unknown	2020-05-31	Holstein	Female	Female	Stage5
SAMEA6655590	PRJEB37691	Bos taurus	Blood	Blood	Blood	Immune System	Immune System	Unknown	Unknown	Unknown	Illumina NovaSeq 6000	Unknown	2020-05-31	Holstein	Female	Female	Stage5
SAMEA6655599	PRJEB37691	Bos taurus	Blood	Blood	Blood	Immune System	Immune System	Unknown	Unknown	Unknown	Illumina NovaSeq 6000	Unknown	2020-05-31	Holstein	Female	Male	Stage5
SAMEA6655604	PRJEB37691	Bos taurus	Blood	Blood	Blood	Immune System	Immune System	Unknown	Unknown	Unknown	Illumina NovaSeq 6000	Unknown	2020-05-31	Holstein	Female	Female	Stage5
SAMEA7060640	PRJEB39396	Bos taurus	Liver	Liver	Liver	Liver	Liver	Female	Holstein	Holstein	NextSeq 500	Unknown	2021-07-09	Holstein	Female	Female	Stage5
SAMEA7060641	PRJEB39396	Bos taurus	Liver	Liver	Liver	Liver	Liver	Female	Holstein	Holstein	NextSeq 500	Unknown	2021-07-09	Holstein	Female	Female	Stage5
SAMEA7060642	PRJEB39396	Bos taurus	Liver	Liver	Liver	Liver	Liver	Female	Holstein	Holstein	NextSeq 500	Unknown	2021-07-09	Holstein	Female	Female	Stage5
SAMEA7060643	PRJEB39396	Bos taurus	Liver	Liver	Liver	Liver	Liver	Female	Holstein	Holstein	NextSeq 500	Unknown	2021-07-09	Holstein	Female	Female	Stage5
SAMEA7060644	PRJEB39396	Bos taurus	Liver	Liver	Liver	Liver	Liver	Female	Holstein	Holstein	NextSeq 500	Unknown	2021-07-09	Holstein	Female	Female	Stage5
SAMEA7060645	PRJEB39396	Bos taurus	Liver	Liver	Liver	Liver	Liver	Female	Holstein	Holstein	NextSeq 500	Unknown	2021-07-09	Holstein	Female	Female	Stage5
SAMEA7060646	PRJEB39396	Bos taurus	Liver	Liver	Liver	Liver	Liver	Female	Holstein	Holstein	NextSeq 500	Unknown	2021-07-09	Holstein	Female	Female	Stage5
SAMEA7060648	PRJEB39396	Bos taurus	Liver	Liver	Liver	Liver	Liver	Female	Holstein	Holstein	NextSeq 500	Unknown	2021-07-09	Holstein	Female	Female	Stage5
SAMEA7060649	PRJEB39396	Bos taurus	Liver	Liver	Liver	Liver	Liver	Female	Holstein	Holstein	NextSeq 500	Unknown	2021-07-09	Holstein	Female	Female	Stage5
SAMEA7060650	PRJEB39396	Bos taurus	Liver	Liver	Liver	Liver	Liver	Female	Holstein	Holstein	NextSeq 500	Unknown	2021-07-09	Holstein	Female	Female	Stage5
SAMEA7060651	PRJEB39396	Bos taurus	Liver	Liver	Liver	Liver	Liver	Female	Holstein	Holstein	NextSeq 500	Unknown	2021-07-09	Holstein	Female	Female	Stage5
SAMEA7060652	PRJEB39396	Bos taurus	Liver	Liver	Liver	Liver	Liver	Female	Holstein	Holstein	NextSeq 500	Unknown	2021-07-09	Holstein	Female	Female	Stage5
SAMEA7060653	PRJEB39396	Bos taurus	Liver	Liver	Liver	Liver	Liver	Female	Holstein	Holstein	NextSeq 500	Unknown	2021-07-09	Holstein	Female	Female	Stage5
SAMEA7060654	PRJEB39396	Bos taurus	Liver	Liver	Liver	Liver	Liver	Female	Holstein	Holstein	NextSeq 500	Unknown	2021-07-09	Holstein	Female	Female	Stage5
SAMEA7060655	PRJEB39396	Bos taurus	Liver	Liver	Liver	Liver	Liver	Female	Holstein	Holstein	NextSeq 500	Unknown	2021-07-09	Holstein	Female	Female	Stage5
SAMEA7060656	PRJEB39396	Bos taurus	Liver	Liver	Liver	Liver	Liver	Female	Holstein	Holstein	NextSeq 500	Unknown	2021-07-09	Holstein	Female	Female	Stage5
SAMEA7060657	PRJEB39396	Bos taurus	Liver	Liver	Liver	Liver	Liver	Female	Holstein	Holstein	NextSeq 500	Unknown	2021-07-09	Holstein	Female	Female	Stage5
SAMEA7060658	PRJEB39396	Bos taurus	Liver	Liver	Liver	Liver	Liver	Female	Holstein	Holstein	NextSeq 500	Unknown	2021-07-09	Holstein	Female	Female	Stage5
SAMEA7060659	PRJEB39396	Bos taurus	Liver	Liver	Liver	Liver	Liver	Female	Holstein	Holstein	NextSeq 500	Unknown	2021-07-09	Holstein	Female	Female	Stage5
SAMEA7060660	PRJEB39396	Bos taurus	Liver	Liver	Liver	Liver	Liver	Female	Holstein	Holstein	NextSeq 500	Unknown	2021-07-09	Holstein	Female	Female	Stage5
SAMEA7060661	PRJEB39396	Bos taurus	Liver	Liver	Liver	Liver	Liver	Female	Holstein	Holstein	NextSeq 500	Unknown	2021-07-09	Holstein	Female	Female	Stage5
SAMEA7060662	PRJEB39396	Bos taurus	Liver	Liver	Liver	Liver	Liver	Female	Holstein	Holstein	NextSeq 500	Unknown	2021-07-09	Holstein	Female	Female	Stage5
SAMEA7060663	PRJEB39396	Bos taurus	Liver	Liver	Liver	Liver	Liver	Female	Holstein	Holstein	NextSeq 500	Unknown	2021-07-09	Holstein	Female	Female	Stage5
SAMEA7060664	PRJEB39396	Bos taurus	Liver	Liver	Liver	Liver	Liver	Female	Holstein	Holstein	NextSeq 500	Unknown	2021-07-09	Holstein	Female	Female	Stage5
SAMEA7060665	PRJEB39396	Bos taurus	Liver	Liver	Liver	Liver	Liver	Female	Holstein	Holstein	NextSeq 500	Unknown	2021-07-09	Holstein	Female	Female	Stage5
SAMEA7060666	PRJEB39396	Bos taurus	Liver	Liver	Liver	Liver	Liver	Female	Holstein	Holstein	NextSeq 500	Unknown	2021-07-09	Holstein	Female	Female	Stage5
SAMEA7060667	PRJEB39396	Bos taurus	Liver	Liver	Liver	Liver	Liver	Female	Holstein	Holstein	NextSeq 500	Unknown	2021-07-09	Holstein	Female	Female	Stage5
SAMEA7060668	PRJEB39396	Bos taurus	Liver	Liver	Liver	Liver	Liver	Female	Holstein	Holstein	NextSeq 500	Unknown	2021-07-09	Holstein	Female	Female	Stage5
SAMEA7060669	PRJEB39396	Bos taurus	Liver	Liver	Liver	Liver	Liver	Female	Holstein	Holstein	NextSeq 500	Unknown	2021-07-09	Holstein	Female	Female	Stage5
SAMEA7060670	PRJEB39396	Bos taurus	Liver	Liver	Liver	Liver	Liver	Female	Holstein	Holstein	NextSeq 500	Unknown	2021-07-09	Holstein	Female	Female	Stage5
SAMEA7060671	PRJEB39396	Bos taurus	Liver	Liver	Liver	Liver	Liver	Female	Holstein	Holstein	NextSeq 500	Unknown	2021-07-09	Holstein	Female	Female	Stage5
SAMEA7060672	PRJEB39396	Bos taurus	Liver	Liver	Liver	Liver	Liver	Female	Holstein	Holstein	NextSeq 500	Unknown	2021-07-09	Holstein	Female	Female	Stage5
SAMEA7060673	PRJEB39396	Bos taurus	Liver	Liver	Liver	Liver	Liver	Female	Holstein	Holstein	NextSeq 500	Unknown	2021-07-09	Holstein	Female	Female	Stage5
SAMEA7060674	PRJEB39396	Bos taurus	Liver	Liver	Liver	Liver	Liver	Female	Holstein	Holstein	NextSeq 500	Unknown	2021-07-09	Holstein	Female	Female	Stage5
SAMEA7060675	PRJEB39396	Bos taurus	Liver	Liver	Liver	Liver	Liver	Female	Holstein	Holstein	NextSeq 500	Unknown	2021-07-09	Holstein	Female	Female	Stage5
SAMEA7060676	PRJEB39396	Bos taurus	Liver	Liver	Liver	Liver	Liver	Female	Holstein	Holstein	NextSeq 500	Unknown	2021-07-09	Holstein	Female	Female	Stage5
SAMEA7060677	PRJEB39396	Bos taurus	Liver	Liver	Liver	Liver	Liver	Female	Holstein	Holstein	NextSeq 500	Unknown	2021-07-09	Holstein	Female	Female	Stage5
SAMEA7060678	PRJEB39396	Bos taurus	Liver	Liver	Liver	Liver	Liver	Female	Holstein	Holstein	NextSeq 500	Unknown	2021-07-09	Holstein	Female	Female	Stage5
SAMEA7060679	PRJEB39396	Bos taurus	Liver	Liver	Liver	Liver	Liver	Female	Holstein	Holstein	NextSeq 500	Unknown	2021-07-09	Holstein	Female	Female	Stage5
SAMEA7060680	PRJEB39396	Bos taurus	Liver	Liver	Liver	Liver	Liver	Female	Holstein	Holstein	NextSeq 500	Unknown	2021-07-09	Holstein	Female	Female	Stage5
SAMEA7060681	PRJEB39396	Bos taurus	Liver	Liver	Liver	Liver	Liver	Female	Holstein	Holstein	NextSeq 500	Unknown	2021-07-09	Holstein	Female	Female	Stage5
SAMEA7060682	PRJEB39396	Bos taurus	Liver	Liver	Liver	Liver	Liver	Female	Holstein	Holstein	NextSeq 500	Unknown	2021-07-09	Holstein	Female	Female	Stage5
SAMEA7060683	PRJEB39396	Bos taurus	Liver	Liver	Liver	Liver	Liver	Female	Holstein	Holstein	NextSeq 500	Unknown	2021-07-09	Holstein	Female	Female	Stage5
SAMEA7060684	PRJEB39396	Bos taurus	Liver	Liver	Liver	Liver	Liver	Female	Holstein	Holstein	NextSeq 500	Unknown	2021-07-09	Holstein	Female	Female	Stage5
SAMEA7060685	PRJEB39396	Bos taurus	Liver	Liver	Liver	Liver	Liver	Female	Holstein	Holstein	NextSeq 500	Unknown	2021-07-09	Holstein	Female	Female	Stage5
SAMEA7060686	PRJEB39396	Bos taurus	Liver	Liver	Liver	Liver	Liver	Female	Holstein	Holstein	NextSeq 500	Unknown	2021-07-09	Holstein	Female	Female	Stage5
SAMEA7060687	PRJEB39396	Bos taurus	Liver	Liver	Liver	Liver	Liver	Female	Holstein	Holstein	NextSeq 500	Unknown	2021-07-09	Holstein	Female	Female	Stage5
SAMEA7060688	PRJEB39396	Bos taurus	Liver	Liver	Liver	Liver	Liver	Female	Holstein	Holstein	NextSeq 500	Unknown	2021-07-09	Holstein	Female	Female	Stage5
SAMEA7060689	PRJEB39396	Bos taurus	Liver	Liver	Liver	Liver	Liver	Female	Holstein	Holstein	NextSeq 500	Unknown	2021-07-09	Holstein	Female	Female	Stage5
SAMEA7060690	PRJEB39396	Bos taurus	Liver	Liver	Liver	Liver	Liver	Female	Holstein	Holstein	NextSeq 500	Unknown	2021-07-09	Holstein	Female	Female	Stage5
SAMEA7060691	PRJEB39396	Bos taurus	Liver	Liver	Liver	Liver	Liver	Female	Holstein	Holstein	NextSeq 500	Unknown	2021-07-09	Holstein	Female	Female	Stage5
SAMEA7060692	PRJEB39396	Bos taurus	Liver	Liver	Liver	Liver	Liver	Female	Holstein	Holstein	NextSeq 500	Unknown	2021-07-09	Holstein	Female	Female	Stage5
SAMEA7060693	PRJEB39396	Bos taurus	Liver	Liver	Liver	Liver	Liver	Female	Holstein	Holstein	NextSeq 500	Unknown	2021-07-09	Holstein	Female	Female	Stage5
SAMEA7060694	PRJEB39396	Bos taurus	Liver	Liver	Liver	Liver	Liver	Female	Holstein	Holstein	NextSeq 500	Unknown	2021-07-09	Holstein	Female	Female	Stage5
SAMEA7060695	PRJEB39396	Bos taurus	Liver	Liver	Liver	Liver	Liver	Female	Holstein	Holstein	NextSeq 500	Unknown	2021-07-09	Holstein	Female	Female	Stage5
SAMEA7060696	PRJEB39396	Bos taurus	Liver	Liver	Liver	Liver	Liver	Female	Holstein	Holstein	NextSeq 500	Unknown	2021-07-09	Holstein	Female	Female	Stage5
SAMEA7060697	PRJEB39396	Bos taurus	Liver	Liver	Liver	Liver	Liver	Female	Holstein	Holstein	NextSeq 500	Unknown	2021-07-09	Holstein	Female	Female	Stage5
SAMEA7060698	PRJEB39396	Bos taurus	Liver	Liver	Liver	Liver	Liver	Female	Holstein	Holstein	NextSeq 500	Unknown	2021-07-09	Holstein	Female	Female	Stage5
SAMEA7060699	PRJEB39396	Bos taurus	Liver	Liver	Liver	Liver	Liver	Female	Holstein	Holstein	NextSeq 500	Unknown	2021-07-09	Holstein	Female	Female	Stage5
SAMEA7060700	PRJEB39396	Bos taurus	Liver	Liver	Liver	Liver	Liver	Female	Holstein	Holstein	NextSeq 500	Unknown	2021-07-09	Holstein	Female	Female	Stage5
SAMEA7060701	PRJEB39396	Bos taurus	Liver	Liver	Liver	Liver	Liver	Female	Holstein	Holstein	NextSeq 500	Unknown	2021-07-09	Holstein	Female	Female	Stage5
SAMEA7060702	PRJEB39396	Bos taurus	Liver	Liver	Liver	Liver	Liver	Female	Holstein	Holstein	NextSeq 500	Unknown	2021-07-09	Holstein	Female	Female	Stage5
SAMEA7060703	PRJEB39396	Bos taurus	Liver	Liver	Liver	Liver	Liver	Female	Holstein	Holstein	NextSeq 500	Unknown	2021-07-09	Holstein	Female	Female	Stage5
SAMEA7060704	PRJEB39396	Bos taurus	Liver	Liver	Liver	Liver	Liver	Female	Holstein	Holstein	NextSeq 500	Unknown	2021-07-09	Holstein	Female	Female	Stage5
SAMEA7060705	PRJEB39396	Bos taurus	Liver	Liver	Liver	Liver	Liver	Female	Holstein	Holstein	NextSeq 500	Unknown	2021-07-09	Holstein	Female	Female	Stage5
SAMEA7060706	PRJEB39396	Bos taurus	Liver	Liver	Liver	Liver	Liver	Female	Holstein	Holstein	NextSeq 500	Unknown	2021-07-09	Holstein	Female	Female	Stage5
SAMEA7060707	PRJEB39396	Bos taurus	Liver	Liver	Liver	Liver	Liver	Female	Holstein	Holstein	NextSeq 500	Unknown	2021-07-09	Holstein	Female	Female	Stage5
SAMEA7060709	PRJEB39396	Bos taurus	Liver	Liver	Liver	Liver	Liver	Female	Holstein	Holstein	NextSeq 500	Unknown	2021-07-09	Holstein	Female	Female	Stage5
SAMEA7060710	PRJEB39396	Bos taurus	Liver	Liver	Liver	Liver	Liver	Female	Holstein	Holstein	NextSeq 500	Unknown	2021-07-09	Holstein	Female	Female	Stage5
SAMEA7060711	PRJEB39396	Bos taurus	Liver	Liver	Liver	Liver	Liver	Female	Holstein	Holstein	NextSeq 500	Unknown	2021-07-09	Holstein	Female	Female	Stage5
SAMEA7060712	PRJEB39396	Bos taurus	Liver	Liver	Liver	Liver	Liver	Female	Holstein	Holstein	NextSeq 500	Unknown	2021-07-09	Holstein	Female	Female	Stage5
SAMEA7060713	PRJEB39396	Bos taurus	Liver	Liver	Liver	Liver	Liver	Female	Holstein	Holstein	NextSeq 500	Unknown	2021-07-09	Holstein	Female	Female	Stage5
SAMEA7060714	PRJEB39396	Bos taurus	Liver	Liver	Liver	Liver	Liver	Female	Holstein	Holstein	NextSeq 500	Unknown	2021-07-09	Holstein	Female	Female	Stage5
SAMEA7060715	PRJEB39396	Bos taurus	Liver	Liver	Liver	Liver	Liver	Female	Holstein	Holstein	NextSeq 500	Unknown	2021-07-09	Holstein	Female	Female	Stage5
SAMEA7060716	PRJEB39396	Bos taurus	Liver	Liver	Liver	Liver	Liver	Female	Holstein	Holstein	NextSeq 500	Unknown	2021-07-09	Holstein	Female	Female	Stage5
SAMEA7060717	PRJEB39396	Bos taurus	Liver	Liver	Liver	Liver	Liver	Female	Holstein	Holstein	NextSeq 500	Unknown	2021-07-09	Holstein	Female	Female	Stage5
SAMEA7060718	PRJEB39396	Bos taurus	Liver	Liver	Liver	Liver	Liver	Female	Holstein	Holstein	NextSeq 500	Unknown	2021-07-09	Holstein	Female	Female	Stage5
SAMEA7060719	PRJEB39396	Bos taurus	Liver	Liver	Liver	Liver	Liver	Female	Holstein	Holstein	NextSeq 500	Unknown	2021-07-09	Holstein	Female	Female	Stage5
SAMEA7060720	PRJEB39396	Bos taurus	Liver	Liver	Liver	Liver	Liver	Female	Holstein	Holstein	NextSeq 500	Unknown	2021-07-09	Holstein	Female	Female	Stage5
SAMEA7060721	PRJEB39396	Bos taurus	Liver	Liver	Liver	Liver	Liver	Female	Holstein	Holstein	NextSeq 500	Unknown	2021-07-09	Holstein	Female	Female	Stage5
SAMEA7060722	PRJEB39396	Bos taurus	Liver	Liver	Liver	Liver	Liver	Female	Holstein	Holstein	NextSeq 500	Unknown	2021-07-09	Holstein	Female	Female	Stage5
SAMEA7060724	PRJEB39396	Bos taurus	Liver	Liver	Liver	Liver	Liver	Female	Holstein	Holstein	NextSeq 500	Unknown	2021-07-09	Holstein	Female	Female	Stage5
SAMEA7060725	PRJEB39396	Bos taurus	Liver	Liver	Liver	Liver	Liver	Female	Holstein	Holstein	NextSeq 500	Unknown	2021-07-09	Holstein	Female	Female	Stage5
SAMEA7060726	PRJEB39396	Bos taurus	Liver	Liver	Liver	Liver	Liver	Female	Holstein	Holstein	NextSeq 500	Unknown	2021-07-09	Holstein	Female	Female	Stage5
SAMEA7060728	PRJEB39396	Bos taurus	Liver	Liver	Liver	Liver	Liver	Female	Holstein	Holstein	NextSeq 500	Unknown	2021-07-09	Holstein	Female	Female	Stage5
SAMEA7060730	PRJEB39396	Bos taurus	Liver	Liver	Liver	Liver	Liver	Female	Holstein	Holstein	NextSeq 500	Unknown	2021-07-09	Holstein	Female	Female	Stage5
SAMEA7060731	PRJEB39396	Bos taurus	Liver	Liver	Liver	Liver	Liver	Female	Holstein	Holstein	NextSeq 500	Unknown	2021-07-09	Holstein	Female	Female	Stage5
SAMEA7060732	PRJEB39396	Bos taurus	Liver	Liver	Liver	Liver	Liver	Female	Holstein	Holstein	NextSeq 500	Unknown	2021-07-09	Holstein	Female	Female	Stage5
SAMEA7060733	PRJEB39396	Bos taurus	Liver	Liver	Liver	Liver	Liver	Female	Holstein	Holstein	NextSeq 500	Unknown	2021-07-09	Holstein	Female	Female	Stage5
SAMEA7060734	PRJEB39396	Bos taurus	Liver	Liver	Liver	Liver	Liver	Female	Holstein	Holstein	NextSeq 500	Unknown	2021-07-09	Holstein	Female	Female	Stage5
SAMEA7060735	PRJEB39396	Bos taurus	Liver	Liver	Liver	Liver	Liver	Female	Holstein	Holstein	NextSeq 500	Unknown	2021-07-09	Holstein	Female	Female	Stage5
SAMEA7060736	PRJEB39396	Bos taurus	Liver	Liver	Liver	Liver	Liver	Female	Holstein	Holstein	NextSeq 500	Unknown	2021-07-09	Holstein	Female	Female	Stage5
SAMEA7060737	PRJEB39396	Bos taurus	Liver	Liver	Liver	Liver	Liver	Female	Holstein	Holstein	NextSeq 500	Unknown	2021-07-09	Holstein	Female	Female	Stage5
SAMEA7060738	PRJEB39396	Bos taurus	Liver	Liver	Liver	Liver	Liver	Female	Holstein	Holstein	NextSeq 500	Unknown	2021-07-09	Holstein	Female	Female	Stage5
SAMEA7060739	PRJEB39396	Bos taurus	Liver	Liver	Liver	Liver	Liver	Female	Holstein	Holstein	NextSeq 500	Unknown	2021-07-09	Holstein	Female	Female	Stage5
SAMEA7060741	PRJEB39396	Bos taurus	Liver	Liver	Liver	Liver	Liver	Female	Holstein	Holstein	NextSeq 500	Unknown	2021-07-09	Holstein	Female	Female	Stage5
SAMEA7060742	PRJEB39396	Bos taurus	Liver	Liver	Liver	Liver	Liver	Female	Holstein	Holstein	NextSeq 500	Unknown	2021-07-09	Holstein	Female	Female	Stage5
SAMEA7060743	PRJEB39396	Bos taurus	Liver	Liver	Liver	Liver	Liver	Female	Holstein	Holstein	NextSeq 500	Unknown	2021-07-09	Holstein	Female	Female	Stage5
SAMEA7060744	PRJEB39396	Bos taurus	Liver	Liver	Liver	Liver	Liver	Female	Holstein	Holstein	NextSeq 500	Unknown	2021-07-09	Holstein	Female	Female	Stage5
SAMEA7060745	PRJEB39396	Bos taurus	Liver	Liver	Liver	Liver	Liver	Female	Holstein	Holstein	NextSeq 500	Unknown	2021-07-09	Holstein	Female	Female	Stage5
SAMEA7060746	PRJEB39396	Bos taurus	Liver	Liver	Liver	Liver	Liver	Female	Holstein	Holstein	NextSeq 500	Unknown	2021-07-09	Holstein	Female	Female	Stage5
SAMEA7060747	PRJEB39397	Bos taurus	Blood	Blood	Blood	Immune System	Immune System	Female	Holstein	Holstein	NextSeq 500	Unknown	2021-07-09	Holstein	Female	Female	Stage5
SAMEA7060748	PRJEB39397	Bos taurus	Blood	Blood	Blood	Immune System	Immune System	Female	Holstein	Holstein	NextSeq 500	Unknown	2021-07-09	Holstein	Female	Female	Stage5
SAMEA7060749	PRJEB39397	Bos taurus	Blood	Blood	Blood	Immune System	Immune System	Female	Holstein	Holstein	NextSeq 500	Unknown	2021-07-09	Holstein	Female	Female	Stage5
SAMEA7060750	PRJEB39397	Bos taurus	Blood	Blood	Blood	Immune System	Immune System	Female	Holstein	Holstein	NextSeq 500	Unknown	2021-07-09	Holstein	Female	Female	Stage5
SAMEA7060751	PRJEB39397	Bos taurus	Blood	Blood	Blood	Immune System	Immune System	Female	Holstein	Holstein	NextSeq 500	Unknown	2021-07-09	Holstein	Female	Female	Stage5
SAMEA7060752	PRJEB39397	Bos taurus	Blood	Blood	Blood	Immune System	Immune System	Female	Holstein	Holstein	NextSeq 500	Unknown	2021-07-09	Holstein	Female	Female	Stage5
SAMEA7060753	PRJEB39397	Bos taurus	Blood	Blood	Blood	Immune System	Immune System	Female	Holstein	Holstein	NextSeq 500	Unknown	2021-07-09	Holstein	Female	Female	Stage5
SAMEA7060754	PRJEB39397	Bos taurus	Blood	Blood	Blood	Immune System	Immune System	Female	Holstein	Holstein	NextSeq 500	Unknown	2021-07-09	Holstein	Female	Female	Stage5
SAMEA7060755	PRJEB39397	Bos taurus	Blood	Blood	Blood	Immune System	Immune System	Female	Holstein	Holstein	NextSeq 500	Unknown	2021-07-09	Holstein	Female	Female	Stage5
SAMEA7060756	PRJEB39397	Bos taurus	Blood	Blood	Blood	Immune System	Immune System	Female	Holstein	Holstein	NextSeq 500	Unknown	2021-07-09	Holstein	Female	Female	Stage5
SAMEA7060757	PRJEB39397	Bos taurus	Blood	Blood	Blood	Immune System	Immune System	Female	Holstein	Holstein	NextSeq 500	Unknown	2021-07-09	Holstein	Female	Female	Stage5
SAMEA7060758	PRJEB39397	Bos taurus	Blood	Blood	Blood	Immune System	Immune System	Female	Holstein	Holstein	NextSeq 500	Unknown	2021-07-09	Holstein	Female	Female	Stage5
SAMEA7060759	PRJEB39397	Bos taurus	Blood	Blood	Blood	Immune System	Immune System	Female	Holstein	Holstein	NextSeq 500	Unknown	2021-07-09	Holstein	Female	Female	Stage5
SAMEA7060760	PRJEB39397	Bos taurus	Blood	Blood	Blood	Immune System	Immune System	Female	Holstein	Holstein	NextSeq 500	Unknown	2021-07-09	Holstein	Female	Female	Stage5
SAMEA7060761	PRJEB39397	Bos taurus	Blood	Blood	Blood	Immune System	Immune System	Female	Holstein	Holstein	NextSeq 500	Unknown	2021-07-09	Holstein	Female	Female	Stage5
SAMEA7060762	PRJEB39397	Bos taurus	Blood	Blood	Blood	Immune System	Immune System	Female	Holstein	Holstein	NextSeq 500	Unknown	2021-07-09	Holstein	Female	Female	Stage5
SAMEA7060763	PRJEB39397	Bos taurus	Blood	Blood	Blood	Immune System	Immune System	Female	Holstein	Holstein	NextSeq 500	Unknown	2021-07-09	Holstein	Female	Female	Stage5
SAMEA7060764	PRJEB39397	Bos taurus	Blood	Blood	Blood	Immune System	Immune System	Female	Holstein	Holstein	NextSeq 500	Unknown	2021-07-09	Holstein	Female	Female	Stage5
SAMEA7060765	PRJEB39397	Bos taurus	Blood	Blood	Blood	Immune System	Immune System	Female	Holstein	Holstein	NextSeq 500	Unknown	2021-07-09	Holstein	Female	Female	Stage5
SAMEA7060766	PRJEB39397	Bos taurus	Blood	Blood	Blood	Immune System	Immune System	Female	Holstein	Holstein	NextSeq 500	Unknown	2021-07-09	Holstein	Female	Female	Stage5
SAMEA7060767	PRJEB39397	Bos taurus	Blood	Blood	Blood	Immune System	Immune System	Female	Holstein	Holstein	NextSeq 500	Unknown	2021-07-09	Holstein	Female	Female	Stage5
SAMEA7060768	PRJEB39397	Bos taurus	Blood	Blood	Blood	Immune System	Immune System	Female	Holstein	Holstein	NextSeq 500	Unknown	2021-07-09	Holstein	Female	Female	Stage5
SAMEA7060769	PRJEB39397	Bos taurus	Blood	Blood	Blood	Immune System	Immune System	Female	Holstein	Holstein	NextSeq 500	Unknown	2021-07-09	Holstein	Female	Female	Stage5
SAMEA7060770	PRJEB39397	Bos taurus	Blood	Blood	Blood	Immune System	Immune System	Female	Holstein	Holstein	NextSeq 500	Unknown	2021-07-09	Holstein	Female	Female	Stage5
SAMEA7060771	PRJEB39397	Bos taurus	Blood	Blood	Blood	Immune System	Immune System	Female	Holstein	Holstein	NextSeq 500	Unknown	2021-07-09	Holstein	Female	Female	Stage5
SAMEA7060772	PRJEB39397	Bos taurus	Blood	Blood	Blood	Immune System	Immune System	Female	Holstein	Holstein	NextSeq 500	Unknown	2021-07-09	Holstein	Female	Female	Stage5
SAMEA7060773	PRJEB39397	Bos taurus	Blood	Blood	Blood	Immune System	Immune System	Female	Holstein	Holstein	NextSeq 500	Unknown	2021-07-09	Holstein	Female	Female	Stage5
SAMEA7060774	PRJEB39397	Bos taurus	Blood	Blood	Blood	Immune System	Immune System	Female	Holstein	Holstein	NextSeq 500	Unknown	2021-07-09	Holstein	Female	Female	Stage5
SAMEA7060775	PRJEB39397	Bos taurus	Blood	Blood	Blood	Immune System	Immune System	Female	Holstein	Holstein	NextSeq 500	Unknown	2021-07-09	Holstein	Female	Female	Stage5
SAMEA7060776	PRJEB39397	Bos taurus	Blood	Blood	Blood	Immune System	Immune System	Female	Holstein	Holstein	NextSeq 500	Unknown	2021-07-09	Holstein	Female	Female	Stage5
SAMEA7060777	PRJEB39397	Bos taurus	Blood	Blood	Blood	Immune System	Immune System	Female	Holstein	Holstein	NextSeq 500	Unknown	2021-07-09	Holstein	Female	Female	Stage5
SAMEA7060778	PRJEB39397	Bos taurus	Blood	Blood	Blood	Immune System	Immune System	Female	Holstein	Holstein	NextSeq 500	Unknown	2021-07-09	Holstein	Female	Female	Stage5
SAMEA7060779	PRJEB39397	Bos taurus	Blood	Blood	Blood	Immune System	Immune System	Female	Holstein	Holstein	NextSeq 500	Unknown	2021-07-09	Holstein	Female	Female	Stage5
SAMEA7060780	PRJEB39397	Bos taurus	Blood	Blood	Blood	Immune System	Immune System	Female	Holstein	Holstein	NextSeq 500	Unknown	2021-07-09	Holstein	Female	Female	Stage5
SAMEA7060782	PRJEB39397	Bos taurus	Blood	Blood	Blood	Immune System	Immune System	Female	Holstein	Holstein	NextSeq 500	Unknown	2021-07-09	Holstein	Female	Female	Stage5
SAMEA7060783	PRJEB39397	Bos taurus	Blood	Blood	Blood	Immune System	Immune System	Female	Holstein	Holstein	NextSeq 500	Unknown	2021-07-09	Holstein	Female	Female	Stage5
SAMEA7060784	PRJEB39397	Bos taurus	Blood	Blood	Blood	Immune System	Immune System	Female	Holstein	Holstein	NextSeq 500	Unknown	2021-07-09	Holstein	Female	Female	Stage5
SAMEA7060785	PRJEB39397	Bos taurus	Blood	Blood	Blood	Immune System	Immune System	Female	Holstein	Holstein	NextSeq 500	Unknown	2021-07-09	Holstein	Female	Female	Stage5
SAMEA7060786	PRJEB39397	Bos taurus	Blood	Blood	Blood	Immune System	Immune System	Female	Holstein	Holstein	NextSeq 500	Unknown	2021-07-09	Holstein	Female	Female	Stage5
SAMEA7060788	PRJEB39397	Bos taurus	Blood	Blood	Blood	Immune System	Immune System	Female	Holstein	Holstein	NextSeq 500	Unknown	2021-07-09	Holstein	Female	Female	Stage5
SAMEA7060789	PRJEB39397	Bos taurus	Blood	Blood	Blood	Immune System	Immune System	Female	Holstein	Holstein	NextSeq 500	Unknown	2021-07-09	Holstein	Female	Female	Stage5
SAMEA7060790	PRJEB39397	Bos taurus	Blood	Blood	Blood	Immune System	Immune System	Female	Holstein	Holstein	NextSeq 500	Unknown	2021-07-09	Holstein	Female	Female	Stage5
SAMEA7060793	PRJEB39397	Bos taurus	Blood	Blood	Blood	Immune System	Immune System	Female	Holstein	Holstein	NextSeq 500	Unknown	2021-07-09	Holstein	Female	Female	Stage5
SAMEA7060796	PRJEB39397	Bos taurus	Blood	Blood	Blood	Immune System	Immune System	Female	Holstein	Holstein	NextSeq 500	Unknown	2021-07-09	Holstein	Female	Female	Unknown
SAMEA7060797	PRJEB39397	Bos taurus	Blood	Blood	Blood	Immune System	Immune System	Female	Holstein	Holstein	NextSeq 500	Unknown	2021-07-09	Holstein	Female	Female	Stage5
SAMEA7060798	PRJEB39397	Bos taurus	Blood	Blood	Blood	Immune System	Immune System	Female	Holstein	Holstein	NextSeq 500	Unknown	2021-07-09	Holstein	Female	Female	Stage5
SAMEA7060799	PRJEB39397	Bos taurus	Blood	Blood	Blood	Immune System	Immune System	Female	Holstein	Holstein	NextSeq 500	Unknown	2021-07-09	Holstein	Female	Female	Stage5
SAMEA7060800	PRJEB39397	Bos taurus	Blood	Blood	Blood	Immune System	Immune System	Female	Holstein	Holstein	NextSeq 500	Unknown	2021-07-09	Holstein	Female	Female	Stage5
SAMEA7060801	PRJEB39397	Bos taurus	Blood	Blood	Blood	Immune System	Immune System	Female	Holstein	Holstein	NextSeq 500	Unknown	2021-07-09	Holstein	Female	Female	Stage5
SAMEA7060803	PRJEB39397	Bos taurus	Blood	Blood	Blood	Immune System	Immune System	Female	Holstein	Holstein	NextSeq 500	Unknown	2021-07-09	Holstein	Female	Female	Stage5
SAMEA7060804	PRJEB39397	Bos taurus	Blood	Blood	Blood	Immune System	Immune System	Female	Holstein	Holstein	NextSeq 500	Unknown	2021-07-09	Holstein	Female	Female	Stage5
SAMEA7060805	PRJEB39397	Bos taurus	Blood	Blood	Blood	Immune System	Immune System	Female	Holstein	Holstein	NextSeq 500	Unknown	2021-07-09	Holstein	Female	Female	Stage5
SAMEA7060806	PRJEB39397	Bos taurus	Blood	Blood	Blood	Immune System	Immune System	Female	Holstein	Holstein	NextSeq 500	Unknown	2021-07-09	Holstein	Female	Female	Stage5
SAMEA7060807	PRJEB39397	Bos taurus	Blood	Blood	Blood	Immune System	Immune System	Female	Holstein	Holstein	NextSeq 500	Unknown	2021-07-09	Holstein	Female	Female	Stage5
SAMEA7060809	PRJEB39397	Bos taurus	Blood	Blood	Blood	Immune System	Immune System	Female	Holstein	Holstein	NextSeq 500	Unknown	2021-07-09	Holstein	Female	Female	Stage5
SAMEA7060810	PRJEB39397	Bos taurus	Blood	Blood	Blood	Immune System	Immune System	Female	Holstein	Holstein	NextSeq 500	Unknown	2021-07-09	Holstein	Female	Female	Stage5
SAMEA7060811	PRJEB39397	Bos taurus	Blood	Blood	Blood	Immune System	Immune System	Female	Holstein	Holstein	NextSeq 500	Unknown	2021-07-09	Holstein	Female	Female	Stage5
SAMEA7060812	PRJEB39397	Bos taurus	Blood	Blood	Blood	Immune System	Immune System	Female	Holstein	Holstein	NextSeq 500	Unknown	2021-07-09	Holstein	Female	Female	Stage5
SAMEA7060813	PRJEB39397	Bos taurus	Blood	Blood	Blood	Immune System	Immune System	Female	Holstein	Holstein	NextSeq 500	Unknown	2021-07-09	Holstein	Female	Female	Stage5
SAMEA7060814	PRJEB39397	Bos taurus	Blood	Blood	Blood	Immune System	Immune System	Female	Holstein	Holstein	NextSeq 500	Unknown	2021-07-09	Holstein	Female	Female	Stage5
SAMEA7060815	PRJEB39397	Bos taurus	Blood	Blood	Blood	Immune System	Immune System	Female	Holstein	Holstein	NextSeq 500	Unknown	2021-07-09	Holstein	Female	Female	Stage5
SAMEA7060816	PRJEB39397	Bos taurus	Blood	Blood	Blood	Immune System	Immune System	Female	Holstein	Holstein	NextSeq 500	Unknown	2021-07-09	Holstein	Female	Female	Stage5
SAMEA7060817	PRJEB39397	Bos taurus	Blood	Blood	Blood	Immune System	Immune System	Female	Holstein	Holstein	NextSeq 500	Unknown	2021-07-09	Holstein	Female	Female	Stage5
SAMEA7060819	PRJEB39397	Bos taurus	Blood	Blood	Blood	Immune System	Immune System	Female	Holstein	Holstein	NextSeq 500	Unknown	2021-07-09	Holstein	Female	Female	Stage5
SAMEA7060820	PRJEB39397	Bos taurus	Blood	Blood	Blood	Immune System	Immune System	Female	Holstein	Holstein	NextSeq 500	Unknown	2021-07-09	Holstein	Female	Female	Stage5
SAMEA7060821	PRJEB39397	Bos taurus	Blood	Blood	Blood	Immune System	Immune System	Female	Holstein	Holstein	NextSeq 500	Unknown	2021-07-09	Holstein	Female	Female	Stage5
SAMEA7060822	PRJEB39397	Bos taurus	Blood	Blood	Blood	Immune System	Immune System	Female	Holstein	Holstein	NextSeq 500	Unknown	2021-07-09	Holstein	Female	Female	Stage5
SAMEA7060823	PRJEB39397	Bos taurus	Blood	Blood	Blood	Immune System	Immune System	Female	Holstein	Holstein	NextSeq 500	Unknown	2021-07-09	Holstein	Female	Female	Stage5
SAMEA7060824	PRJEB39397	Bos taurus	Blood	Blood	Blood	Immune System	Immune System	Female	Holstein	Holstein	NextSeq 500	Unknown	2021-07-09	Holstein	Female	Female	Stage5
SAMEA7060825	PRJEB39397	Bos taurus	Blood	Blood	Blood	Immune System	Immune System	Female	Holstein	Holstein	NextSeq 500	Unknown	2021-07-09	Holstein	Female	Female	Stage5
SAMEA7060826	PRJEB39397	Bos taurus	Blood	Blood	Blood	Immune System	Immune System	Female	Holstein	Holstein	NextSeq 500	Unknown	2021-07-09	Holstein	Female	Female	Stage5
SAMEA7060827	PRJEB39397	Bos taurus	Blood	Blood	Blood	Immune System	Immune System	Female	Holstein	Holstein	NextSeq 500	Unknown	2021-07-09	Holstein	Female	Female	Stage5
SAMEA7060828	PRJEB39397	Bos taurus	Blood	Blood	Blood	Immune System	Immune System	Female	Holstein	Holstein	NextSeq 500	Unknown	2021-07-09	Holstein	Female	Female	Stage5
SAMEA7060829	PRJEB39397	Bos taurus	Blood	Blood	Blood	Immune System	Immune System	Female	Holstein	Holstein	NextSeq 500	Unknown	2021-07-09	Holstein	Female	Female	Stage5
SAMEA7060830	PRJEB39397	Bos taurus	Blood	Blood	Blood	Immune System	Immune System	Female	Holstein	Holstein	NextSeq 500	Unknown	2021-07-09	Holstein	Female	Female	Stage5
SAMEA7060831	PRJEB39397	Bos taurus	Blood	Blood	Blood	Immune System	Immune System	Female	Holstein	Holstein	NextSeq 500	Unknown	2021-07-09	Holstein	Female	Female	Stage5
SAMEA7060832	PRJEB39397	Bos taurus	Blood	Blood	Blood	Immune System	Immune System	Female	Holstein	Holstein	NextSeq 500	Unknown	2021-07-09	Holstein	Female	Female	Stage5
SAMEA7060834	PRJEB39397	Bos taurus	Blood	Blood	Blood	Immune System	Immune System	Female	Holstein	Holstein	NextSeq 500	Unknown	2021-07-09	Holstein	Female	Female	Stage5
SAMEA7060835	PRJEB39397	Bos taurus	Blood	Blood	Blood	Immune System	Immune System	Female	Holstein	Holstein	NextSeq 500	Unknown	2021-07-09	Holstein	Female	Female	Stage5
SAMEA7060838	PRJEB39397	Bos taurus	Blood	Blood	Blood	Immune System	Immune System	Female	Holstein	Holstein	NextSeq 500	Unknown	2021-07-09	Holstein	Female	Female	Stage5
SAMEA7060839	PRJEB39397	Bos taurus	Blood	Blood	Blood	Immune System	Immune System	Female	Holstein	Holstein	NextSeq 500	Unknown	2021-07-09	Holstein	Female	Female	Stage5
SAMEA7060841	PRJEB39397	Bos taurus	Blood	Blood	Blood	Immune System	Immune System	Female	Holstein	Holstein	NextSeq 500	Unknown	2021-07-09	Holstein	Female	Female	Stage5
SAMEA7060842	PRJEB39397	Bos taurus	Blood	Blood	Blood	Immune System	Immune System	Female	Holstein	Holstein	NextSeq 500	Unknown	2021-07-09	Holstein	Female	Female	Stage5
SAMEA7060843	PRJEB39397	Bos taurus	Blood	Blood	Blood	Immune System	Immune System	Female	Holstein	Holstein	NextSeq 500	Unknown	2021-07-09	Holstein	Female	Female	Stage5
SAMEA7060844	PRJEB39397	Bos taurus	Blood	Blood	Blood	Immune System	Immune System	Female	Holstein	Holstein	NextSeq 500	Unknown	2021-07-09	Holstein	Female	Female	Stage5
SAMEA7060845	PRJEB39397	Bos taurus	Blood	Blood	Blood	Immune System	Immune System	Female	Holstein	Holstein	NextSeq 500	Unknown	2021-07-09	Holstein	Female	Female	Stage5
SAMEA7060846	PRJEB39397	Bos taurus	Blood	Blood	Blood	Immune System	Immune System	Female	Holstein	Holstein	NextSeq 500	Unknown	2021-07-09	Holstein	Female	Female	Stage5
SAMEA7060847	PRJEB39397	Bos taurus	Blood	Blood	Blood	Immune System	Immune System	Female	Holstein	Holstein	NextSeq 500	Unknown	2021-07-09	Holstein	Female	Female	Stage5
SAMEA7060848	PRJEB39397	Bos taurus	Blood	Blood	Blood	Immune System	Immune System	Female	Holstein	Holstein	NextSeq 500	Unknown	2021-07-09	Holstein	Female	Female	Stage5
SAMEA7060849	PRJEB39397	Bos taurus	Blood	Blood	Blood	Immune System	Immune System	Female	Holstein	Holstein	NextSeq 500	Unknown	2021-07-09	Holstein	Female	Female	Stage5
SAMEA7060850	PRJEB39397	Bos taurus	Blood	Blood	Blood	Immune System	Immune System	Female	Holstein	Holstein	NextSeq 500	Unknown	2021-07-09	Holstein	Female	Female	Stage5
SAMEA7060851	PRJEB39397	Bos taurus	Blood	Blood	Blood	Immune System	Immune System	Female	Holstein	Holstein	NextSeq 500	Unknown	2021-07-09	Holstein	Female	Female	Stage5
SAMEA7060857	PRJEB39397	Bos taurus	Blood	Blood	Blood	Immune System	Immune System	Female	Holstein	Holstein	NextSeq 500	Unknown	2021-07-09	Holstein	Female	Female	Stage5
SAMEA7060858	PRJEB39397	Bos taurus	Blood	Blood	Blood	Immune System	Immune System	Female	Holstein	Holstein	NextSeq 500	Unknown	2021-07-09	Holstein	Female	Female	Stage5
SAMEA7060859	PRJEB39397	Bos taurus	Blood	Blood	Blood	Immune System	Immune System	Female	Holstein	Holstein	NextSeq 500	Unknown	2021-07-09	Holstein	Female	Female	Stage5
SAMEA7060860	PRJEB39397	Bos taurus	Blood	Blood	Blood	Immune System	Immune System	Female	Holstein	Holstein	NextSeq 500	Unknown	2021-07-09	Holstein	Female	Female	Stage5
SAMEA7060861	PRJEB39397	Bos taurus	Blood	Blood	Blood	Immune System	Immune System	Female	Holstein	Holstein	NextSeq 500	Unknown	2021-07-09	Holstein	Female	Female	Stage5
SAMEA7060862	PRJEB39397	Bos taurus	Blood	Blood	Blood	Immune System	Immune System	Female	Holstein	Holstein	NextSeq 500	Unknown	2021-07-09	Holstein	Female	Female	Stage5
SAMEA7060864	PRJEB39397	Bos taurus	Blood	Blood	Blood	Immune System	Immune System	Female	Holstein	Holstein	NextSeq 500	Unknown	2021-07-09	Holstein	Female	Female	Stage5
SAMEA7060868	PRJEB39397	Bos taurus	Blood	Blood	Blood	Immune System	Immune System	Female	Holstein	Holstein	NextSeq 500	Unknown	2021-07-09	Holstein	Female	Female	Stage5
SAMEA7060871	PRJEB39397	Bos taurus	Blood	Blood	Blood	Immune System	Immune System	Female	Holstein	Holstein	NextSeq 500	Unknown	2021-07-09	Holstein	Female	Female	Stage5
SAMEA7060872	PRJEB39397	Bos taurus	Blood	Blood	Blood	Immune System	Immune System	Female	Holstein	Holstein	NextSeq 500	Unknown	2021-07-09	Holstein	Female	Female	Stage5
SAMEA7060873	PRJEB39397	Bos taurus	Blood	Blood	Blood	Immune System	Immune System	Female	Holstein	Holstein	NextSeq 500	Unknown	2021-07-09	Holstein	Female	Female	Stage5
SAMEA7060874	PRJEB39397	Bos taurus	Blood	Blood	Blood	Immune System	Immune System	Female	Holstein	Holstein	NextSeq 500	Unknown	2021-07-09	Holstein	Female	Female	Stage5
SAMEA7335979	PRJEB40498	Bos taurus	Blood	Blood	Blood	Immune System	Immune System	Female	Holstein	Holstein	NextSeq 500	Unknown	2021-07-09	Holstein	Female	Female	Stage5
SAMEA7335980	PRJEB40498	Bos taurus	Blood	Blood	Blood	Immune System	Immune System	Female	Holstein	Holstein	NextSeq 500	Unknown	2021-07-09	Holstein	Female	Female	Stage5
SAMEA7335981	PRJEB40498	Bos taurus	Blood	Blood	Blood	Immune System	Immune System	Female	Holstein	Holstein	NextSeq 500	Unknown	2021-07-09	Holstein	Female	Female	Stage5
SAMEA7335982	PRJEB40498	Bos taurus	Blood	Blood	Blood	Immune System	Immune System	Female	Holstein	Holstein	NextSeq 500	Unknown	2021-07-09	Holstein	Female	Female	Stage5
SAMEA7335983	PRJEB40498	Bos taurus	Blood	Blood	Blood	Immune System	Immune System	Female	Holstein	Holstein	NextSeq 500	Unknown	2021-07-09	Holstein	Female	Female	Stage5
SAMEA7335984	PRJEB40498	Bos taurus	Blood	Blood	Blood	Immune System	Immune System	Female	Holstein	Holstein	NextSeq 500	Unknown	2021-07-09	Holstein	Female	Female	Stage5
SAMEA7335985	PRJEB40498	Bos taurus	Blood	Blood	Blood	Immune System	Immune System	Female	Holstein	Holstein	NextSeq 500	Unknown	2021-07-09	Holstein	Female	Female	Stage5
SAMEA7335986	PRJEB40498	Bos taurus	Blood	Blood	Blood	Immune System	Immune System	Female	Holstein	Holstein	NextSeq 500	Unknown	2021-07-09	Holstein	Female	Female	Stage5
SAMEA7335987	PRJEB40498	Bos taurus	Blood	Blood	Blood	Immune System	Immune System	Female	Holstein	Holstein	NextSeq 500	Unknown	2021-07-09	Holstein	Female	Female	Stage5
SAMEA7335988	PRJEB40498	Bos taurus	Blood	Blood	Blood	Immune System	Immune System	Female	Holstein	Holstein	NextSeq 500	Unknown	2021-07-09	Holstein	Female	Female	Stage5
SAMEA7335989	PRJEB40498	Bos taurus	Blood	Blood	Blood	Immune System	Immune System	Female	Holstein	Holstein	NextSeq 500	Unknown	2021-07-09	Holstein	Female	Female	Stage5
SAMEA7335990	PRJEB40498	Bos taurus	Blood	Blood	Blood	Immune System	Immune System	Female	Holstein	Holstein	NextSeq 500	Unknown	2021-07-09	Holstein	Female	Female	Stage5
SAMEA7335991	PRJEB40498	Bos taurus	Blood	Blood	Blood	Immune System	Immune System	Female	Holstein	Holstein	NextSeq 500	Unknown	2021-07-09	Holstein	Female	Female	Stage5
SAMEA7335992	PRJEB40498	Bos taurus	Blood	Blood	Blood	Immune System	Immune System	Female	Holstein	Holstein	NextSeq 500	Unknown	2021-07-09	Holstein	Female	Female	Stage5
SAMEA7335993	PRJEB40498	Bos taurus	Blood	Blood	Blood	Immune System	Immune System	Female	Holstein	Holstein	NextSeq 500	Unknown	2021-07-09	Holstein	Female	Female	Stage5
SAMEA7335994	PRJEB40498	Bos taurus	Blood	Blood	Blood	Immune System	Immune System	Female	Holstein	Holstein	NextSeq 500	Unknown	2021-07-09	Holstein	Female	Female	Stage5
SAMEA7335995	PRJEB40498	Bos taurus	Blood	Blood	Blood	Immune System	Immune System	Female	Holstein	Holstein	NextSeq 500	Unknown	2021-07-09	Holstein	Female	Female	Stage5
SAMEA7335996	PRJEB40498	Bos taurus	Blood	Blood	Blood	Immune System	Immune System	Female	Holstein	Holstein	NextSeq 500	Unknown	2021-07-09	Holstein	Female	Female	Stage5
SAMEA7335997	PRJEB40498	Bos taurus	Blood	Blood	Blood	Immune System	Immune System	Female	Holstein	Holstein	NextSeq 500	Unknown	2021-07-09	Holstein	Female	Female	Stage5
SAMEA7335998	PRJEB40498	Bos taurus	Blood	Blood	Blood	Immune System	Immune System	Female	Holstein	Holstein	NextSeq 500	Unknown	2021-07-09	Holstein	Female	Female	Stage5
SAMEA7335999	PRJEB40498	Bos taurus	Blood	Blood	Blood	Immune System	Immune System	Female	Holstein	Holstein	NextSeq 500	Unknown	2021-07-09	Holstein	Female	Female	Stage5
SAMEA7336000	PRJEB40498	Bos taurus	Blood	Blood	Blood	Immune System	Immune System	Female	Holstein	Holstein	NextSeq 500	Unknown	2021-07-09	Holstein	Female	Female	Stage5
SAMEA7336001	PRJEB40498	Bos taurus	Blood	Blood	Blood	Immune System	Immune System	Female	Holstein	Holstein	NextSeq 500	Unknown	2021-07-09	Holstein	Female	Female	Stage5
SAMEA7336002	PRJEB40498	Bos taurus	Blood	Blood	Blood	Immune System	Immune System	Female	Holstein	Holstein	NextSeq 500	Unknown	2021-07-09	Holstein	Female	Female	Stage5
SAMEA7336003	PRJEB40498	Bos taurus	Blood	Blood	Blood	Immune System	Immune System	Female	Holstein	Holstein	NextSeq 500	Unknown	2021-07-09	Holstein	Female	Female	Stage5
SAMEA7336004	PRJEB40498	Bos taurus	Blood	Blood	Blood	Immune System	Immune System	Female	Holstein	Holstein	NextSeq 500	Unknown	2021-07-09	Holstein	Female	Female	Stage5
SAMEA7336005	PRJEB40498	Bos taurus	Blood	Blood	Blood	Immune System	Immune System	Female	Holstein	Holstein	NextSeq 500	Unknown	2021-07-09	Holstein	Female	Female	Stage5
SAMEA7336006	PRJEB40498	Bos taurus	Blood	Blood	Blood	Immune System	Immune System	Female	Holstein	Holstein	NextSeq 500	Unknown	2021-07-09	Holstein	Female	Female	Stage5
SAMEA7336007	PRJEB40498	Bos taurus	Blood	Blood	Blood	Immune System	Immune System	Female	Holstein	Holstein	NextSeq 500	Unknown	2021-07-09	Holstein	Female	Female	Stage5
SAMEA7336008	PRJEB40498	Bos taurus	Blood	Blood	Blood	Immune System	Immune System	Female	Holstein	Holstein	NextSeq 500	Unknown	2021-07-09	Holstein	Female	Female	Stage5
SAMEA7336009	PRJEB40498	Bos taurus	Blood	Blood	Blood	Immune System	Immune System	Female	Holstein	Holstein	NextSeq 500	Unknown	2021-07-09	Holstein	Female	Female	Stage5
SAMEA7336010	PRJEB40498	Bos taurus	Blood	Blood	Blood	Immune System	Immune System	Female	Holstein	Holstein	NextSeq 500	Unknown	2021-07-09	Holstein	Female	Female	Stage5
SAMEA7336011	PRJEB40498	Bos taurus	Blood	Blood	Blood	Immune System	Immune System	Female	Holstein	Holstein	NextSeq 500	Unknown	2021-07-09	Holstein	Female	Female	Stage5
SAMEA7336012	PRJEB40498	Bos taurus	Blood	Blood	Blood	Immune System	Immune System	Female	Holstein	Holstein	NextSeq 500	Unknown	2021-07-09	Holstein	Female	Female	Stage5
SAMEA7336013	PRJEB40498	Bos taurus	Blood	Blood	Blood	Immune System	Immune System	Female	Holstein	Holstein	NextSeq 500	Unknown	2021-07-09	Holstein	Female	Female	Stage5
SAMEA7336014	PRJEB40498	Bos taurus	Blood	Blood	Blood	Immune System	Immune System	Female	Holstein	Holstein	NextSeq 500	Unknown	2021-07-09	Holstein	Female	Female	Stage5
SAMEA7336015	PRJEB40498	Bos taurus	Blood	Blood	Blood	Immune System	Immune System	Female	Holstein	Holstein	NextSeq 500	Unknown	2021-07-09	Holstein	Female	Female	Stage5
SAMEA7336016	PRJEB40498	Bos taurus	Blood	Blood	Blood	Immune System	Immune System	Female	Holstein	Holstein	NextSeq 500	Unknown	2021-07-09	Holstein	Female	Female	Stage5
SAMEA7336017	PRJEB40498	Bos taurus	Blood	Blood	Blood	Immune System	Immune System	Female	Holstein	Holstein	NextSeq 500	Unknown	2021-07-09	Holstein	Female	Female	Stage5
SAMEA7336018	PRJEB40498	Bos taurus	Blood	Blood	Blood	Immune System	Immune System	Female	Holstein	Holstein	NextSeq 500	Unknown	2021-07-09	Holstein	Female	Female	Stage5
SAMEA7336019	PRJEB40498	Bos taurus	Blood	Blood	Blood	Immune System	Immune System	Female	Holstein	Holstein	NextSeq 500	Unknown	2021-07-09	Holstein	Female	Female	Stage5
SAMEA7336020	PRJEB40498	Bos taurus	Blood	Blood	Blood	Immune System	Immune System	Female	Holstein	Holstein	NextSeq 500	Unknown	2021-07-09	Holstein	Female	Female	Stage5
SAMEA7336021	PRJEB40498	Bos taurus	Blood	Blood	Blood	Immune System	Immune System	Female	Holstein	Holstein	NextSeq 500	Unknown	2021-07-09	Holstein	Female	Female	Stage5
SAMEA7336022	PRJEB40498	Bos taurus	Blood	Blood	Blood	Immune System	Immune System	Female	Holstein	Holstein	NextSeq 500	Unknown	2021-07-09	Holstein	Female	Female	Stage5
SAMEA7336025	PRJEB40498	Bos taurus	Blood	Blood	Blood	Immune System	Immune System	Female	Holstein	Holstein	NextSeq 500	Unknown	2021-07-09	Holstein	Female	Female	Stage5
SAMEA7336026	PRJEB40498	Bos taurus	Blood	Blood	Blood	Immune System	Immune System	Female	Holstein	Holstein	NextSeq 500	Unknown	2021-07-09	Holstein	Female	Female	Stage5
SAMEA7336027	PRJEB40498	Bos taurus	Blood	Blood	Blood	Immune System	Immune System	Female	Holstein	Holstein	NextSeq 500	Unknown	2021-07-09	Holstein	Female	Female	Stage5
SAMEA7336028	PRJEB40498	Bos taurus	Blood	Blood	Blood	Immune System	Immune System	Female	Holstein	Holstein	NextSeq 500	Unknown	2021-07-09	Holstein	Female	Female	Stage5
SAMEA7336029	PRJEB40498	Bos taurus	Blood	Blood	Blood	Immune System	Immune System	Female	Holstein	Holstein	NextSeq 500	Unknown	2021-07-09	Holstein	Female	Female	Stage5
SAMEA7336030	PRJEB40498	Bos taurus	Blood	Blood	Blood	Immune System	Immune System	Female	Holstein	Holstein	NextSeq 500	Unknown	2021-07-09	Holstein	Female	Female	Stage5
SAMEA7336031	PRJEB40498	Bos taurus	Blood	Blood	Blood	Immune System	Immune System	Female	Holstein	Holstein	NextSeq 500	Unknown	2021-07-09	Holstein	Female	Female	Stage5
SAMEA7336032	PRJEB40498	Bos taurus	Blood	Blood	Blood	Immune System	Immune System	Female	Holstein	Holstein	NextSeq 500	Unknown	2021-07-09	Holstein	Female	Female	Stage5
SAMEA7336033	PRJEB40498	Bos taurus	Blood	Blood	Blood	Immune System	Immune System	Female	Holstein	Holstein	NextSeq 500	Unknown	2021-07-09	Holstein	Female	Female	Stage5
SAMEA7336034	PRJEB40498	Bos taurus	Blood	Blood	Blood	Immune System	Immune System	Female	Holstein	Holstein	NextSeq 500	Unknown	2021-07-09	Holstein	Female	Female	Stage5
SAMEA7336035	PRJEB40498	Bos taurus	Blood	Blood	Blood	Immune System	Immune System	Female	Holstein	Holstein	NextSeq 500	Unknown	2021-07-09	Holstein	Female	Female	Stage5
SAMEA7336036	PRJEB40498	Bos taurus	Blood	Blood	Blood	Immune System	Immune System	Female	Holstein	Holstein	NextSeq 500	Unknown	2021-07-09	Holstein	Female	Female	Stage5
SAMEA7336037	PRJEB40498	Bos taurus	Blood	Blood	Blood	Immune System	Immune System	Female	Holstein	Holstein	NextSeq 500	Unknown	2021-07-09	Holstein	Female	Female	Stage5
SAMEA7336038	PRJEB40498	Bos taurus	Blood	Blood	Blood	Immune System	Immune System	Female	Holstein	Holstein	NextSeq 500	Unknown	2021-07-09	Holstein	Female	Female	Stage5
SAMEA7336039	PRJEB40498	Bos taurus	Blood	Blood	Blood	Immune System	Immune System	Female	Holstein	Holstein	NextSeq 500	Unknown	2021-07-09	Holstein	Female	Female	Stage5
SAMEA7336041	PRJEB40498	Bos taurus	Blood	Blood	Blood	Immune System	Immune System	Female	Holstein	Holstein	NextSeq 500	Unknown	2021-07-09	Holstein	Female	Female	Stage5
SAMEA7336042	PRJEB40498	Bos taurus	Blood	Blood	Blood	Immune System	Immune System	Female	Holstein	Holstein	NextSeq 500	Unknown	2021-07-09	Holstein	Female	Female	Stage5
SAMEA7336043	PRJEB40498	Bos taurus	Blood	Blood	Blood	Immune System	Immune System	Female	Holstein	Holstein	NextSeq 500	Unknown	2021-07-09	Holstein	Female	Female	Stage5
SAMEA7336046	PRJEB40498	Bos taurus	Blood	Blood	Blood	Immune System	Immune System	Female	Holstein	Holstein	NextSeq 500	Unknown	2021-07-09	Holstein	Female	Female	Stage5
SAMEA7336047	PRJEB40498	Bos taurus	Blood	Blood	Blood	Immune System	Immune System	Female	Holstein	Holstein	NextSeq 500	Unknown	2021-07-09	Holstein	Female	Female	Stage5
SAMEA7336049	PRJEB40498	Bos taurus	Blood	Blood	Blood	Immune System	Immune System	Female	Holstein	Holstein	NextSeq 500	Unknown	2021-07-09	Holstein	Female	Female	Stage5
SAMEA7336051	PRJEB40498	Bos taurus	Blood	Blood	Blood	Immune System	Immune System	Female	Holstein	Holstein	NextSeq 500	Unknown	2021-07-09	Holstein	Female	Female	Stage5
SAMEA7336052	PRJEB40498	Bos taurus	Blood	Blood	Blood	Immune System	Immune System	Female	Holstein	Holstein	NextSeq 500	Unknown	2021-07-09	Holstein	Female	Female	Stage5
SAMEA7336053	PRJEB40498	Bos taurus	Blood	Blood	Blood	Immune System	Immune System	Female	Holstein	Holstein	NextSeq 500	Unknown	2021-07-09	Holstein	Female	Female	Stage5
SAMEA7336054	PRJEB40498	Bos taurus	Blood	Blood	Blood	Immune System	Immune System	Female	Holstein	Holstein	NextSeq 500	Unknown	2021-07-09	Holstein	Female	Female	Stage5
SAMEA7336055	PRJEB40498	Bos taurus	Blood	Blood	Blood	Immune System	Immune System	Female	Holstein	Holstein	NextSeq 500	Unknown	2021-07-09	Holstein	Female	Female	Stage5
SAMEA7336056	PRJEB40498	Bos taurus	Blood	Blood	Blood	Immune System	Immune System	Female	Holstein	Holstein	NextSeq 500	Unknown	2021-07-09	Holstein	Female	Female	Stage5
SAMEA7336057	PRJEB40498	Bos taurus	Blood	Blood	Blood	Immune System	Immune System	Female	Holstein	Holstein	NextSeq 500	Unknown	2021-07-09	Holstein	Female	Female	Stage5
SAMEA7336058	PRJEB40498	Bos taurus	Blood	Blood	Blood	Immune System	Immune System	Female	Holstein	Holstein	NextSeq 500	Unknown	2021-07-09	Holstein	Female	Female	Stage5
SAMEA7336059	PRJEB40498	Bos taurus	Blood	Blood	Blood	Immune System	Immune System	Female	Holstein	Holstein	NextSeq 500	Unknown	2021-07-09	Holstein	Female	Female	Stage5
SAMEA7336060	PRJEB40498	Bos taurus	Blood	Blood	Blood	Immune System	Immune System	Female	Holstein	Holstein	NextSeq 500	Unknown	2021-07-09	Holstein	Female	Female	Stage5
SAMEA7336061	PRJEB40498	Bos taurus	Blood	Blood	Blood	Immune System	Immune System	Female	Holstein	Holstein	NextSeq 500	Unknown	2021-07-09	Holstein	Female	Female	Stage5
SAMEA7336062	PRJEB40498	Bos taurus	Blood	Blood	Blood	Immune System	Immune System	Female	Holstein	Holstein	NextSeq 500	Unknown	2021-07-09	Holstein	Female	Female	Stage5
SAMEA7336063	PRJEB40498	Bos taurus	Blood	Blood	Blood	Immune System	Immune System	Female	Holstein	Holstein	NextSeq 500	Unknown	2021-07-09	Holstein	Female	Female	Stage5
SAMEA7336064	PRJEB40498	Bos taurus	Blood	Blood	Blood	Immune System	Immune System	Female	Holstein	Holstein	NextSeq 500	Unknown	2021-07-09	Holstein	Female	Female	Stage5
SAMEA7336065	PRJEB40498	Bos taurus	Blood	Blood	Blood	Immune System	Immune System	Female	Holstein	Holstein	NextSeq 500	Unknown	2021-07-09	Holstein	Female	Female	Stage5
SAMEA7336066	PRJEB40498	Bos taurus	Blood	Blood	Blood	Immune System	Immune System	Female	Holstein	Holstein	NextSeq 500	Unknown	2021-07-09	Holstein	Female	Female	Stage5
SAMEA7336067	PRJEB40498	Bos taurus	Blood	Blood	Blood	Immune System	Immune System	Female	Holstein	Holstein	NextSeq 500	Unknown	2021-07-09	Holstein	Female	Female	Stage5
SAMEA7336069	PRJEB40498	Bos taurus	Blood	Blood	Blood	Immune System	Immune System	Female	Holstein	Holstein	NextSeq 500	Unknown	2021-07-09	Holstein	Female	Female	Stage5
SAMEA7336070	PRJEB40498	Bos taurus	Blood	Blood	Blood	Immune System	Immune System	Female	Holstein	Holstein	NextSeq 500	Unknown	2021-07-09	Holstein	Female	Female	Stage5
SAMEA7336071	PRJEB40498	Bos taurus	Blood	Blood	Blood	Immune System	Immune System	Female	Holstein	Holstein	NextSeq 500	Unknown	2021-07-09	Holstein	Female	Female	Stage5
SAMEA7336072	PRJEB40498	Bos taurus	Blood	Blood	Blood	Immune System	Immune System	Female	Holstein	Holstein	NextSeq 500	Unknown	2021-07-09	Holstein	Female	Female	Stage5
SAMEA7336073	PRJEB40498	Bos taurus	Blood	Blood	Blood	Immune System	Immune System	Female	Holstein	Holstein	NextSeq 500	Unknown	2021-07-09	Holstein	Female	Female	Stage5
SAMEA7336075	PRJEB40498	Bos taurus	Blood	Blood	Blood	Immune System	Immune System	Female	Holstein	Holstein	NextSeq 500	Unknown	2021-07-09	Holstein	Female	Female	Stage5
SAMEA7336076	PRJEB40498	Bos taurus	Blood	Blood	Blood	Immune System	Immune System	Female	Holstein	Holstein	NextSeq 500	Unknown	2021-07-09	Holstein	Female	Female	Stage5
SAMEA7336077	PRJEB40498	Bos taurus	Blood	Blood	Blood	Immune System	Immune System	Female	Holstein	Holstein	NextSeq 500	Unknown	2021-07-09	Holstein	Female	Female	Stage5
SAMEA7336078	PRJEB40498	Bos taurus	Blood	Blood	Blood	Immune System	Immune System	Female	Holstein	Holstein	NextSeq 500	Unknown	2021-07-09	Holstein	Female	Female	Stage5
SAMEA7336079	PRJEB40498	Bos taurus	Blood	Blood	Blood	Immune System	Immune System	Female	Holstein	Holstein	NextSeq 500	Unknown	2021-07-09	Holstein	Female	Female	Stage5
SAMEA7336080	PRJEB40498	Bos taurus	Blood	Blood	Blood	Immune System	Immune System	Female	Holstein	Holstein	NextSeq 500	Unknown	2021-07-09	Holstein	Female	Female	Stage5
SAMEA7336081	PRJEB40498	Bos taurus	Blood	Blood	Blood	Immune System	Immune System	Female	Holstein	Holstein	NextSeq 500	Unknown	2021-07-09	Holstein	Female	Female	Stage5
SAMEA7336082	PRJEB40498	Bos taurus	Blood	Blood	Blood	Immune System	Immune System	Female	Holstein	Holstein	NextSeq 500	Unknown	2021-07-09	Holstein	Female	Female	Stage5
SAMEA7336083	PRJEB40498	Bos taurus	Blood	Blood	Blood	Immune System	Immune System	Female	Holstein	Holstein	NextSeq 500	Unknown	2021-07-09	Holstein	Female	Female	Stage5
SAMEA7336085	PRJEB40498	Bos taurus	Blood	Blood	Blood	Immune System	Immune System	Female	Holstein	Holstein	NextSeq 500	Unknown	2021-07-09	Holstein	Female	Female	Stage5
SAMEA7336086	PRJEB40498	Bos taurus	Blood	Blood	Blood	Immune System	Immune System	Female	Holstein	Holstein	NextSeq 500	Unknown	2021-07-09	Holstein	Female	Female	Stage5
SAMEA7336087	PRJEB40498	Bos taurus	Blood	Blood	Blood	Immune System	Immune System	Female	Holstein	Holstein	NextSeq 500	Unknown	2021-07-09	Holstein	Female	Female	Stage5
SAMEA7336088	PRJEB40498	Bos taurus	Blood	Blood	Blood	Immune System	Immune System	Female	Holstein	Holstein	NextSeq 500	Unknown	2021-07-09	Holstein	Female	Female	Stage5
SAMEA7336089	PRJEB40498	Bos taurus	Blood	Blood	Blood	Immune System	Immune System	Female	Holstein	Holstein	NextSeq 500	Unknown	2021-07-09	Holstein	Female	Female	Stage5
SAMEA7336090	PRJEB40498	Bos taurus	Blood	Blood	Blood	Immune System	Immune System	Female	Holstein	Holstein	NextSeq 500	Unknown	2021-07-09	Holstein	Female	Female	Stage5
SAMEA7336091	PRJEB40498	Bos taurus	Blood	Blood	Blood	Immune System	Immune System	Female	Holstein	Holstein	NextSeq 500	Unknown	2021-07-09	Holstein	Female	Female	Stage5
SAMEA7336092	PRJEB40498	Bos taurus	Blood	Blood	Blood	Immune System	Immune System	Female	Holstein	Holstein	NextSeq 500	Unknown	2021-07-09	Holstein	Female	Female	Stage5
SAMEA7336094	PRJEB40498	Bos taurus	Blood	Blood	Blood	Immune System	Immune System	Female	Holstein	Holstein	NextSeq 500	Unknown	2021-07-09	Holstein	Female	Female	Stage5
SAMEA7336095	PRJEB40498	Bos taurus	Blood	Blood	Blood	Immune System	Immune System	Female	Holstein	Holstein	NextSeq 500	Unknown	2021-07-09	Holstein	Female	Female	Stage5
SAMEA7336096	PRJEB40498	Bos taurus	Blood	Blood	Blood	Immune System	Immune System	Female	Holstein	Holstein	NextSeq 500	Unknown	2021-07-09	Holstein	Female	Female	Stage5
SAMEA7336097	PRJEB40498	Bos taurus	Blood	Blood	Blood	Immune System	Immune System	Female	Holstein	Holstein	NextSeq 500	Unknown	2021-07-09	Holstein	Female	Female	Stage5
SAMEA7336099	PRJEB40498	Bos taurus	Blood	Blood	Blood	Immune System	Immune System	Female	Holstein	Holstein	NextSeq 500	Unknown	2021-07-09	Holstein	Female	Female	Stage5
SAMEA7336100	PRJEB40498	Bos taurus	Blood	Blood	Blood	Immune System	Immune System	Female	Holstein	Holstein	NextSeq 500	Unknown	2021-07-09	Holstein	Female	Female	Stage5
SAMEA7336101	PRJEB40498	Bos taurus	Blood	Blood	Blood	Immune System	Immune System	Female	Holstein	Holstein	NextSeq 500	Unknown	2021-07-09	Holstein	Female	Female	Stage5
SAMEA7336102	PRJEB40498	Bos taurus	Blood	Blood	Blood	Immune System	Immune System	Female	Holstein	Holstein	NextSeq 500	Unknown	2021-07-09	Holstein	Female	Female	Stage5
SAMEA7336103	PRJEB40498	Bos taurus	Blood	Blood	Blood	Immune System	Immune System	Female	Holstein	Holstein	NextSeq 500	Unknown	2021-07-09	Holstein	Female	Female	Stage5
SAMEA7336104	PRJEB40498	Bos taurus	Blood	Blood	Blood	Immune System	Immune System	Female	Holstein	Holstein	NextSeq 500	Unknown	2021-07-09	Holstein	Female	Female	Stage5
SAMEA7336105	PRJEB40498	Bos taurus	Blood	Blood	Blood	Immune System	Immune System	Female	Holstein	Holstein	NextSeq 500	Unknown	2021-07-09	Holstein	Female	Female	Stage5
SAMEA7336106	PRJEB40498	Bos taurus	Blood	Blood	Blood	Immune System	Immune System	Female	Holstein	Holstein	NextSeq 500	Unknown	2021-07-09	Holstein	Female	Female	Stage5
SAMEA7336107	PRJEB40498	Bos taurus	Blood	Blood	Blood	Immune System	Immune System	Female	Holstein	Holstein	NextSeq 500	Unknown	2021-07-09	Holstein	Female	Female	Stage5
SAMEA7336108	PRJEB40498	Bos taurus	Blood	Blood	Blood	Immune System	Immune System	Female	Holstein	Holstein	NextSeq 500	Unknown	2021-07-09	Holstein	Female	Female	Stage5
SAMEA7699285	PRJEB41811	Bos taurus	Liver	Liver	Liver	Liver	Liver	Female	Holstein	Holstein	NextSeq 500	Unknown	2021-07-09	Holstein	Female	Female	Stage5
SAMEA7699286	PRJEB41811	Bos taurus	Liver	Liver	Liver	Liver	Liver	Female	Holstein	Holstein	NextSeq 500	Unknown	2021-07-09	Holstein	Female	Female	Stage5
SAMEA7699287	PRJEB41811	Bos taurus	Liver	Liver	Liver	Liver	Liver	Female	Holstein	Holstein	NextSeq 500	Unknown	2021-07-09	Holstein	Female	Female	Stage5
SAMEA7699288	PRJEB41811	Bos taurus	Liver	Liver	Liver	Liver	Liver	Female	Holstein	Holstein	NextSeq 500	Unknown	2021-07-09	Holstein	Female	Female	Stage5
SAMEA7699289	PRJEB41811	Bos taurus	Liver	Liver	Liver	Liver	Liver	Female	Holstein	Holstein	NextSeq 500	Unknown	2021-07-09	Holstein	Female	Female	Stage5
SAMEA7699290	PRJEB41811	Bos taurus	Liver	Liver	Liver	Liver	Liver	Female	Holstein	Holstein	NextSeq 500	Unknown	2021-07-09	Holstein	Female	Female	Stage5
SAMEA7699291	PRJEB41811	Bos taurus	Liver	Liver	Liver	Liver	Liver	Female	Holstein	Holstein	NextSeq 500	Unknown	2021-07-09	Holstein	Female	Female	Stage5
SAMEA7699292	PRJEB41811	Bos taurus	Liver	Liver	Liver	Liver	Liver	Female	Holstein	Holstein	NextSeq 500	Unknown	2021-07-09	Holstein	Female	Female	Stage5
SAMEA7699293	PRJEB41811	Bos taurus	Liver	Liver	Liver	Liver	Liver	Female	Holstein	Holstein	NextSeq 500	Unknown	2021-07-09	Holstein	Female	Female	Stage5
SAMEA7699294	PRJEB41811	Bos taurus	Liver	Liver	Liver	Liver	Liver	Female	Holstein	Holstein	NextSeq 500	Unknown	2021-07-09	Holstein	Female	Female	Stage5
SAMEA7699295	PRJEB41811	Bos taurus	Liver	Liver	Liver	Liver	Liver	Female	Holstein	Holstein	NextSeq 500	Unknown	2021-07-09	Holstein	Female	Female	Stage5
SAMEA7699296	PRJEB41811	Bos taurus	Liver	Liver	Liver	Liver	Liver	Female	Holstein	Holstein	NextSeq 500	Unknown	2021-07-09	Holstein	Female	Female	Stage5
SAMEA7699297	PRJEB41811	Bos taurus	Liver	Liver	Liver	Liver	Liver	Female	Holstein	Holstein	NextSeq 500	Unknown	2021-07-09	Holstein	Female	Female	Stage5
SAMEA7699298	PRJEB41811	Bos taurus	Liver	Liver	Liver	Liver	Liver	Female	Holstein	Holstein	NextSeq 500	Unknown	2021-07-09	Holstein	Female	Female	Stage5
SAMEA7699299	PRJEB41811	Bos taurus	Liver	Liver	Liver	Liver	Liver	Female	Holstein	Holstein	NextSeq 500	Unknown	2021-07-09	Holstein	Female	Female	Stage5
SAMEA7699300	PRJEB41811	Bos taurus	Liver	Liver	Liver	Liver	Liver	Female	Holstein	Holstein	NextSeq 500	Unknown	2021-07-09	Holstein	Female	Female	Stage5
SAMEA7699301	PRJEB41811	Bos taurus	Liver	Liver	Liver	Liver	Liver	Female	Holstein	Holstein	NextSeq 500	Unknown	2021-07-09	Holstein	Female	Female	Stage5
SAMEA7699302	PRJEB41811	Bos taurus	Liver	Liver	Liver	Liver	Liver	Female	Holstein	Holstein	NextSeq 500	Unknown	2021-07-09	Holstein	Female	Female	Stage5
SAMEA7699303	PRJEB41811	Bos taurus	Liver	Liver	Liver	Liver	Liver	Female	Holstein	Holstein	NextSeq 500	Unknown	2021-07-09	Holstein	Female	Female	Stage5
SAMEA7699304	PRJEB41811	Bos taurus	Liver	Liver	Liver	Liver	Liver	Female	Holstein	Holstein	NextSeq 500	Unknown	2021-07-09	Holstein	Female	Female	Stage5
SAMEA7699305	PRJEB41811	Bos taurus	Liver	Liver	Liver	Liver	Liver	Female	Holstein	Holstein	NextSeq 500	Unknown	2021-07-09	Holstein	Female	Female	Stage5
SAMEA7699306	PRJEB41811	Bos taurus	Liver	Liver	Liver	Liver	Liver	Female	Holstein	Holstein	NextSeq 500	Unknown	2021-07-09	Holstein	Female	Female	Stage5
SAMEA7699307	PRJEB41811	Bos taurus	Liver	Liver	Liver	Liver	Liver	Female	Holstein	Holstein	NextSeq 500	Unknown	2021-07-09	Holstein	Female	Female	Stage5
SAMEA7699308	PRJEB41811	Bos taurus	Liver	Liver	Liver	Liver	Liver	Female	Holstein	Holstein	NextSeq 500	Unknown	2021-07-09	Holstein	Female	Female	Stage5
SAMEA7699309	PRJEB41811	Bos taurus	Liver	Liver	Liver	Liver	Liver	Female	Holstein	Holstein	NextSeq 500	Unknown	2021-07-09	Holstein	Female	Female	Stage5
SAMEA7699310	PRJEB41811	Bos taurus	Liver	Liver	Liver	Liver	Liver	Female	Holstein	Holstein	NextSeq 500	Unknown	2021-07-09	Holstein	Female	Female	Stage5
SAMEA7699311	PRJEB41811	Bos taurus	Liver	Liver	Liver	Liver	Liver	Female	Holstein	Holstein	NextSeq 500	Unknown	2021-07-09	Holstein	Female	Female	Stage5
SAMEA7699312	PRJEB41811	Bos taurus	Liver	Liver	Liver	Liver	Liver	Female	Holstein	Holstein	NextSeq 500	Unknown	2021-07-09	Holstein	Female	Female	Stage5
SAMEA7699313	PRJEB41811	Bos taurus	Liver	Liver	Liver	Liver	Liver	Female	Holstein	Holstein	NextSeq 500	Unknown	2021-07-09	Holstein	Female	Female	Stage5
SAMEA7699314	PRJEB41811	Bos taurus	Liver	Liver	Liver	Liver	Liver	Female	Holstein	Holstein	NextSeq 500	Unknown	2021-07-09	Holstein	Female	Female	Stage5
SAMEA7699315	PRJEB41811	Bos taurus	Liver	Liver	Liver	Liver	Liver	Female	Holstein	Holstein	NextSeq 500	Unknown	2021-07-09	Holstein	Female	Female	Stage5
SAMEA7699316	PRJEB41811	Bos taurus	Liver	Liver	Liver	Liver	Liver	Female	Holstein	Holstein	NextSeq 500	Unknown	2021-07-09	Holstein	Female	Female	Stage5
SAMEA7699317	PRJEB41811	Bos taurus	Liver	Liver	Liver	Liver	Liver	Female	Holstein	Holstein	NextSeq 500	Unknown	2021-07-09	Holstein	Female	Female	Stage5
SAMEA7699318	PRJEB41811	Bos taurus	Liver	Liver	Liver	Liver	Liver	Female	Holstein	Holstein	NextSeq 500	Unknown	2021-07-09	Holstein	Female	Female	Stage5
SAMEA7699319	PRJEB41811	Bos taurus	Liver	Liver	Liver	Liver	Liver	Female	Holstein	Holstein	NextSeq 500	Unknown	2021-07-09	Holstein	Female	Female	Stage5
SAMEA7699320	PRJEB41811	Bos taurus	Liver	Liver	Liver	Liver	Liver	Female	Holstein	Holstein	NextSeq 500	Unknown	2021-07-09	Holstein	Female	Female	Stage5
SAMEA7699321	PRJEB41811	Bos taurus	Liver	Liver	Liver	Liver	Liver	Female	Holstein	Holstein	NextSeq 500	Unknown	2021-07-09	Holstein	Female	Female	Stage5
SAMEA7699322	PRJEB41811	Bos taurus	Liver	Liver	Liver	Liver	Liver	Female	Holstein	Holstein	NextSeq 500	Unknown	2021-07-09	Holstein	Female	Female	Stage5
SAMEA7699323	PRJEB41811	Bos taurus	Liver	Liver	Liver	Liver	Liver	Female	Holstein	Holstein	NextSeq 500	Unknown	2021-07-09	Holstein	Female	Female	Stage5
SAMEA7699324	PRJEB41811	Bos taurus	Liver	Liver	Liver	Liver	Liver	Female	Holstein	Holstein	NextSeq 500	Unknown	2021-07-09	Holstein	Female	Female	Stage5
SAMEA7699325	PRJEB41811	Bos taurus	Liver	Liver	Liver	Liver	Liver	Female	Holstein	Holstein	NextSeq 500	Unknown	2021-07-09	Holstein	Female	Female	Stage5
SAMEA7699326	PRJEB41811	Bos taurus	Liver	Liver	Liver	Liver	Liver	Female	Holstein	Holstein	NextSeq 500	Unknown	2021-07-09	Holstein	Female	Female	Stage5
SAMEA7699327	PRJEB41811	Bos taurus	Liver	Liver	Liver	Liver	Liver	Female	Holstein	Holstein	NextSeq 500	Unknown	2021-07-09	Holstein	Female	Female	Stage5
SAMEA7699328	PRJEB41811	Bos taurus	Liver	Liver	Liver	Liver	Liver	Female	Holstein	Holstein	NextSeq 500	Unknown	2021-07-09	Holstein	Female	Female	Stage5
SAMEA7699329	PRJEB41811	Bos taurus	Liver	Liver	Liver	Liver	Liver	Female	Holstein	Holstein	NextSeq 500	Unknown	2021-07-09	Holstein	Female	Female	Stage5
SAMEA7699330	PRJEB41811	Bos taurus	Liver	Liver	Liver	Liver	Liver	Female	Holstein	Holstein	NextSeq 500	Unknown	2021-07-09	Holstein	Female	Female	Stage5
SAMEA7699331	PRJEB41811	Bos taurus	Liver	Liver	Liver	Liver	Liver	Female	Holstein	Holstein	NextSeq 500	Unknown	2021-07-09	Holstein	Female	Female	Stage5
SAMEA7699332	PRJEB41811	Bos taurus	Liver	Liver	Liver	Liver	Liver	Female	Holstein	Holstein	NextSeq 500	Unknown	2021-07-09	Holstein	Female	Female	Stage5
SAMEA7699333	PRJEB41811	Bos taurus	Liver	Liver	Liver	Liver	Liver	Female	Holstein	Holstein	NextSeq 500	Unknown	2021-07-09	Holstein	Female	Female	Stage5
SAMEA7699334	PRJEB41811	Bos taurus	Liver	Liver	Liver	Liver	Liver	Female	Holstein	Holstein	NextSeq 500	Unknown	2021-07-09	Holstein	Female	Female	Stage5
SAMEA7699335	PRJEB41811	Bos taurus	Liver	Liver	Liver	Liver	Liver	Female	Holstein	Holstein	NextSeq 500	Unknown	2021-07-09	Holstein	Female	Female	Stage5
SAMEA7699336	PRJEB41811	Bos taurus	Liver	Liver	Jejunum	Liver	Digestive System	Female	Holstein	Holstein	NextSeq 500	Unknown	2021-07-09	Holstein	Female	Female	Stage5
SAMEA7699337	PRJEB41811	Bos taurus	Liver	Liver	Liver	Liver	Liver	Female	Holstein	Holstein	NextSeq 500	Unknown	2021-07-09	Holstein	Female	Female	Stage5
SAMEA7699338	PRJEB41811	Bos taurus	Liver	Liver	Liver	Liver	Liver	Female	Holstein	Holstein	NextSeq 500	Unknown	2021-07-09	Holstein	Female	Female	Stage5
SAMEA7699339	PRJEB41811	Bos taurus	Liver	Liver	Liver	Liver	Liver	Female	Holstein	Holstein	NextSeq 500	Unknown	2021-07-09	Holstein	Female	Female	Stage5
SAMEA7699340	PRJEB41811	Bos taurus	Liver	Liver	Liver	Liver	Liver	Female	Holstein	Holstein	NextSeq 500	Unknown	2021-07-09	Holstein	Female	Female	Stage5
SAMEA7699341	PRJEB41811	Bos taurus	Liver	Liver	Liver	Liver	Liver	Female	Holstein	Holstein	NextSeq 500	Unknown	2021-07-09	Holstein	Female	Female	Stage5
SAMEA7699342	PRJEB41811	Bos taurus	Liver	Liver	Liver	Liver	Liver	Female	Holstein	Holstein	NextSeq 500	Unknown	2021-07-09	Holstein	Female	Female	Stage5
SAMEA7699343	PRJEB41811	Bos taurus	Liver	Liver	Liver	Liver	Liver	Female	Holstein	Holstein	NextSeq 500	Unknown	2021-07-09	Holstein	Female	Female	Stage5
SAMEA7699344	PRJEB41811	Bos taurus	Liver	Liver	Liver	Liver	Liver	Female	Holstein	Holstein	NextSeq 500	Unknown	2021-07-09	Holstein	Female	Female	Stage5
SAMEA7699345	PRJEB41811	Bos taurus	Liver	Liver	Liver	Liver	Liver	Female	Holstein	Holstein	NextSeq 500	Unknown	2021-07-09	Holstein	Female	Female	Stage5
SAMEA7699346	PRJEB41811	Bos taurus	Liver	Liver	Liver	Liver	Liver	Female	Holstein	Holstein	NextSeq 500	Unknown	2021-07-09	Holstein	Female	Female	Stage5
SAMEA7699347	PRJEB41811	Bos taurus	Liver	Liver	Liver	Liver	Liver	Female	Holstein	Holstein	NextSeq 500	Unknown	2021-07-09	Holstein	Female	Female	Stage5
SAMEA7699348	PRJEB41811	Bos taurus	Liver	Liver	Liver	Liver	Liver	Female	Holstein	Holstein	NextSeq 500	Unknown	2021-07-09	Holstein	Female	Female	Stage5
SAMEA7699349	PRJEB41811	Bos taurus	Liver	Liver	Liver	Liver	Liver	Female	Holstein	Holstein	NextSeq 500	Unknown	2021-07-09	Holstein	Female	Female	Stage5
SAMEA7699350	PRJEB41811	Bos taurus	Liver	Liver	Liver	Liver	Liver	Female	Holstein	Holstein	NextSeq 500	Unknown	2021-07-09	Holstein	Female	Female	Stage5
SAMEA7699351	PRJEB41811	Bos taurus	Liver	Liver	Liver	Liver	Liver	Female	Holstein	Holstein	NextSeq 500	Unknown	2021-07-09	Holstein	Female	Female	Stage5
SAMEA7699352	PRJEB41811	Bos taurus	Liver	Liver	Liver	Liver	Liver	Female	Holstein	Holstein	NextSeq 500	Unknown	2021-07-09	Holstein	Female	Female	Stage5
SAMEA7699353	PRJEB41811	Bos taurus	Liver	Liver	Liver	Liver	Liver	Female	Holstein	Holstein	NextSeq 500	Unknown	2021-07-09	Holstein	Female	Female	Stage5
SAMEA7699354	PRJEB41811	Bos taurus	Liver	Liver	Liver	Liver	Liver	Female	Holstein	Holstein	NextSeq 500	Unknown	2021-07-09	Holstein	Female	Female	Stage5
SAMEA7699355	PRJEB41811	Bos taurus	Liver	Liver	Liver	Liver	Liver	Female	Holstein	Holstein	NextSeq 500	Unknown	2021-07-09	Holstein	Female	Female	Stage5
SAMEA7699356	PRJEB41811	Bos taurus	Liver	Liver	Liver	Liver	Liver	Female	Holstein	Holstein	NextSeq 500	Unknown	2021-07-09	Holstein	Female	Female	Stage5
SAMEA7699357	PRJEB41811	Bos taurus	Liver	Liver	Liver	Liver	Liver	Female	Holstein	Holstein	NextSeq 500	Unknown	2021-07-09	Holstein	Female	Female	Stage5
SAMEA7699358	PRJEB41811	Bos taurus	Liver	Liver	Liver	Liver	Liver	Female	Holstein	Holstein	NextSeq 500	Unknown	2021-07-09	Holstein	Female	Female	Stage5
SAMEA7699359	PRJEB41811	Bos taurus	Liver	Liver	Liver	Liver	Liver	Female	Holstein	Holstein	NextSeq 500	Unknown	2021-07-09	Holstein	Female	Female	Stage5
SAMEA7699360	PRJEB41811	Bos taurus	Liver	Liver	Liver	Liver	Liver	Female	Holstein	Holstein	NextSeq 500	Unknown	2021-07-09	Holstein	Female	Female	Stage5
SAMEA7699361	PRJEB41811	Bos taurus	Liver	Liver	Liver	Liver	Liver	Female	Holstein	Holstein	NextSeq 500	Unknown	2021-07-09	Holstein	Female	Female	Stage5
SAMEA8391158	PRJEB43817	Bos taurus	Brain	CNS	Blood	Nervous System	Immune System	Unknown	Unknown	Unknown	Illumina NovaSeq 6000	Unknown	2021-04-19	Holstein	Male	Male	Stage5
SAMEA8391160	PRJEB43817	Bos taurus	Brain	CNS	Blood	Nervous System	Immune System	Unknown	Unknown	Unknown	Illumina NovaSeq 6000	Unknown	2021-04-19	Holstein	Male	Male	Stage5
SAMEA8391161	PRJEB43817	Bos taurus	Brain	CNS	Blood	Nervous System	Immune System	Unknown	Unknown	Unknown	Illumina NovaSeq 6000	Unknown	2021-04-19	Holstein	Male	Male	Stage5
SAMEA8391162	PRJEB43817	Bos taurus	Brain	CNS	Blood	Nervous System	Immune System	Unknown	Unknown	Unknown	Illumina NovaSeq 6000	Unknown	2021-04-19	Holstein	Female	Female	Stage5
SAMEA8391163	PRJEB43817	Bos taurus	Brain	CNS	Blood	Nervous System	Immune System	Unknown	Unknown	Unknown	Illumina NovaSeq 6000	Unknown	2021-04-19	Brown Swiss	Male	Female	Stage5
SAMEA8391165	PRJEB43817	Bos taurus	Blood	Blood	Blood	Immune System	Immune System	Unknown	Unknown	Unknown	Illumina NovaSeq 6000	Unknown	2021-04-19	Holstein	Male	Male	Stage5
SAMEA8391173	PRJEB43817	Bos taurus	Brain	CNS	CNS	Nervous System	Nervous System	Unknown	Unknown	Unknown	Illumina NovaSeq 6000	Unknown	2021-04-19	Holstein	Male	Male	Unknown
SAMEA8391174	PRJEB43817	Bos taurus	Brain	CNS	CNS	Nervous System	Nervous System	Unknown	Unknown	Unknown	Illumina NovaSeq 6000	Unknown	2021-04-19	Holstein	Male	Male	Unknown
SAMEA8391175	PRJEB43817	Bos taurus	Brain	CNS	CNS	Nervous System	Nervous System	Unknown	Unknown	Unknown	Illumina NovaSeq 6000	Unknown	2021-04-19	Holstein	Male	Female	Unknown
SAMEA8391176	PRJEB43817	Bos taurus	Brain	CNS	CNS	Nervous System	Nervous System	Unknown	Unknown	Unknown	Illumina NovaSeq 6000	Unknown	2021-04-19	Jersey	Male	Male	Unknown
SAMEA8391178	PRJEB43817	Bos taurus	Blood	Blood	Blood	Immune System	Immune System	Unknown	Unknown	Unknown	Illumina NovaSeq 6000	Unknown	2021-04-19	Holstein	Male	Male	Stage2
SAMEA8391179	PRJEB43817	Bos taurus	Blood	Blood	Blood	Immune System	Immune System	Unknown	Unknown	Unknown	Illumina NovaSeq 6000	Unknown	2021-04-19	Simmental	Female	Female	Unknown
SAMEA8556449	PRJEB44244	Bos indicus	Blood	Blood	Blood	Immune System	Immune System	Unknown	Unknown	Unknown	Illumina NovaSeq 6000	Unknown	2023-03-21	Boran	Unknown	Female	Stage5
SAMEA8556450	PRJEB44244	Bos indicus	Blood	Blood	Blood	Immune System	Immune System	Unknown	Unknown	Unknown	Illumina NovaSeq 6000	Unknown	2023-03-21	Horro	Unknown	Male	Stage5
SAMEA8556451	PRJEB44244	Bos indicus	Blood	Blood	Blood	Immune System	Immune System	Unknown	Unknown	Unknown	Illumina NovaSeq 6000	Unknown	2023-03-21	Boran	Unknown	Female	Stage5
SAMEA8556452	PRJEB44244	Bos indicus	Blood	Blood	Blood	Immune System	Immune System	Unknown	Unknown	Unknown	Illumina NovaSeq 6000	Unknown	2023-03-21	Boran	Unknown	Female	Stage5
SAMEA8556453	PRJEB44244	Bos indicus	Blood	Blood	Blood	Immune System	Immune System	Unknown	Unknown	Unknown	Illumina NovaSeq 6000	Unknown	2023-03-21	Boran	Unknown	Female	Stage5
SAMEA8556455	PRJEB44244	Bos indicus	Blood	Blood	Blood	Immune System	Immune System	Unknown	Unknown	Unknown	Illumina NovaSeq 6000	Unknown	2023-03-21	Boran	Unknown	Female	Stage5
SAMEA8556456	PRJEB44244	Bos indicus	Blood	Blood	Blood	Immune System	Immune System	Unknown	Unknown	Unknown	Illumina NovaSeq 6000	Unknown	2023-03-21	Boran	Unknown	Male	Stage5
SAMEA8556457	PRJEB44244	Bos indicus	Blood	Blood	Blood	Immune System	Immune System	Unknown	Unknown	Unknown	Illumina NovaSeq 6000	Unknown	2023-03-21	Boran	Unknown	Male	Stage5
SAMEA8556458	PRJEB44244	Bos indicus	Blood	Blood	Blood	Immune System	Immune System	Unknown	Unknown	Unknown	Illumina NovaSeq 6000	Unknown	2023-03-21	Boran	Unknown	Female	Stage5
SAMEA8556459	PRJEB44244	Bos indicus	Blood	Blood	Blood	Immune System	Immune System	Unknown	Unknown	Unknown	Illumina NovaSeq 6000	Unknown	2023-03-21	Boran	Unknown	Male	Stage5
SAMEA8556460	PRJEB44244	Bos indicus	Blood	Blood	Blood	Immune System	Immune System	Unknown	Unknown	Unknown	Illumina NovaSeq 6000	Unknown	2023-03-21	Boran	Unknown	Male	Stage5
SAMEA8556461	PRJEB44244	Bos indicus	Blood	Blood	Blood	Immune System	Immune System	Unknown	Unknown	Unknown	Illumina NovaSeq 6000	Unknown	2023-03-21	Boran	Unknown	Male	Stage5
SAMEA8556462	PRJEB44244	Bos indicus	Blood	Blood	Blood	Immune System	Immune System	Unknown	Unknown	Unknown	Illumina NovaSeq 6000	Unknown	2023-03-21	Boran	Unknown	Male	Stage5
SAMEA8556463	PRJEB44244	Bos indicus	Blood	Blood	Blood	Immune System	Immune System	Unknown	Unknown	Unknown	Illumina NovaSeq 6000	Unknown	2023-03-21	Boran	Unknown	Female	Stage5
SAMEA8556464	PRJEB44244	Bos indicus	Blood	Blood	Blood	Immune System	Immune System	Unknown	Unknown	Unknown	Illumina NovaSeq 6000	Unknown	2023-03-21	Boran	Unknown	Male	Stage5
SAMEA8556465	PRJEB44244	Bos indicus	Blood	Blood	Blood	Immune System	Immune System	Unknown	Unknown	Unknown	Illumina NovaSeq 6000	Unknown	2023-03-21	Boran	Unknown	Female	Stage5
SAMEA8556466	PRJEB44244	Bos indicus	Blood	Blood	Blood	Immune System	Immune System	Unknown	Unknown	Unknown	Illumina NovaSeq 6000	Unknown	2023-03-21	Boran	Unknown	Male	Stage5
SAMEA8556467	PRJEB44244	Bos indicus	Blood	Blood	Blood	Immune System	Immune System	Unknown	Unknown	Unknown	Illumina NovaSeq 6000	Unknown	2023-03-21	Boran	Unknown	Female	Stage5
SAMEA8556468	PRJEB44244	Bos indicus	Blood	Blood	Blood	Immune System	Immune System	Unknown	Unknown	Unknown	Illumina NovaSeq 6000	Unknown	2023-03-21	Boran	Unknown	Male	Stage2
SAMEA8556469	PRJEB44244	Bos indicus	Blood	Blood	Blood	Immune System	Immune System	Unknown	Unknown	Unknown	Illumina NovaSeq 6000	Unknown	2023-03-21	Boran	Unknown	Female	Stage5
SAMEA8556470	PRJEB44244	Bos indicus	Blood	Blood	Blood	Immune System	Immune System	Unknown	Unknown	Unknown	Illumina NovaSeq 6000	Unknown	2023-03-21	Boran	Unknown	Male	Stage5
SAMEA8556471	PRJEB44244	Bos indicus	Blood	Blood	Blood	Immune System	Immune System	Unknown	Unknown	Unknown	Illumina NovaSeq 6000	Unknown	2023-03-21	Boran	Unknown	Male	Unknown
SAMEA8556472	PRJEB44244	Bos indicus	Blood	Blood	Blood	Immune System	Immune System	Unknown	Unknown	Unknown	Illumina NovaSeq 6000	Unknown	2023-03-21	Boran	Unknown	Male	Stage5
SAMEA8556473	PRJEB44244	Bos indicus	Blood	Blood	Blood	Immune System	Immune System	Unknown	Unknown	Unknown	Illumina NovaSeq 6000	Unknown	2023-03-21	Arsi	Unknown	Male	Unknown
SAMEA8556474	PRJEB44244	Bos indicus	Blood	Blood	Blood	Immune System	Immune System	Unknown	Unknown	Unknown	Illumina NovaSeq 6000	Unknown	2023-03-21	Boran	Unknown	Female	Stage5
SAMEA8556475	PRJEB44244	Bos indicus	Blood	Blood	Blood	Immune System	Immune System	Unknown	Unknown	Unknown	Illumina NovaSeq 6000	Unknown	2023-03-21	Boran	Unknown	Male	Unknown
SAMEA8556476	PRJEB44244	Bos indicus	Blood	Blood	Blood	Immune System	Immune System	Unknown	Unknown	Unknown	Illumina NovaSeq 6000	Unknown	2023-03-21	Boran	Unknown	Female	Stage5
SAMEA8556477	PRJEB44244	Bos indicus	Blood	Blood	Blood	Immune System	Immune System	Unknown	Unknown	Unknown	Illumina NovaSeq 6000	Unknown	2023-03-21	Boran	Unknown	Male	Unknown
SAMEA8612493	PRJEB44470	Bos taurus	Peripheral Blood	Blood	Blood	Immune System	Immune System	Male	Holstein	Holstein	Illumina HiSeq 2000	4-6 months	2021-05-18	Holstein	Male	Male	Stage2
SAMEA8612500	PRJEB44470	Bos taurus	Peripheral Blood	Blood	Blood	Immune System	Immune System	Male	Holstein	Holstein	Illumina HiSeq 2000	4-6 months	2021-05-18	Holstein	Male	Male	Stage2
SAMEA8612510	PRJEB44470	Bos taurus	Peripheral Blood	Blood	Blood	Immune System	Immune System	Male	Holstein	Holstein	Illumina HiSeq 2000	4-6 months	2021-05-18	Holstein	Male	Male	Stage2
SAMEA8659742	PRJEB44568	Bos taurus	Peripheral Blood	Blood	Blood	Immune System	Immune System	Male	Holstein	Holstein	Illumina HiSeq 2000	4-6 months	2022-08-03	Holstein	Male	Male	Stage2
SAMEA8659756	PRJEB44568	Bos taurus	Peripheral Blood	Blood	Blood	Immune System	Immune System	Male	Holstein	Holstein	Illumina HiSeq 2000	4-6 months	2022-08-03	Holstein	Male	Male	Stage2
SAMEA8659763	PRJEB44568	Bos taurus	Peripheral Blood	Blood	Blood	Immune System	Immune System	Male	Holstein	Holstein	Illumina HiSeq 2000	4-6 months	2022-08-03	Holstein	Male	Male	Stage2
SAMEA8659770	PRJEB44568	Bos taurus	Peripheral Blood	Blood	Blood	Immune System	Immune System	Male	Holstein	Holstein	Illumina HiSeq 2000	4-6 months	2022-08-03	Holstein	Male	Male	Stage2
SAMEA8659778	PRJEB44568	Bos taurus	Peripheral Blood	Blood	Blood	Immune System	Immune System	Male	Holstein	Holstein	Illumina HiSeq 2000	4-6 months	2022-08-03	Holstein	Male	Male	Stage2
SAMEA8659794	PRJEB44568	Bos taurus	Peripheral Blood	Blood	Blood	Immune System	Immune System	Male	Holstein	Holstein	Illumina HiSeq 2000	4-6 months	2022-08-03	Holstein	Male	Male	Stage2
SAMEA8659808	PRJEB44568	Bos taurus	Peripheral Blood	Blood	Blood	Immune System	Immune System	Male	Holstein	Holstein	Illumina HiSeq 2000	4-6 months	2022-08-03	Holstein	Male	Male	Stage2
SAMEA9540537	PRJEB46995	Bos taurus	Testis	Testis	Testis	Male Reproductive System	Male Reproductive System	Male	Unknown	Unknown	Illumina NovaSeq 6000	Unknown	2021-09-27	Brown Swiss	Male	Male	Stage5
SAMEA9540538	PRJEB46995	Bos taurus	Testis	Testis	Testis	Male Reproductive System	Male Reproductive System	Male	Unknown	Unknown	Illumina NovaSeq 6000	Unknown	2021-09-27	Brown Swiss	Male	Male	Stage5
SAMEA9540539	PRJEB46995	Bos taurus	Testis	Testis	Testis	Male Reproductive System	Male Reproductive System	Male	Unknown	Unknown	Illumina NovaSeq 6000	Unknown	2021-09-27	Brown Swiss	Male	Male	Stage5
SAMEA9540540	PRJEB46995	Bos taurus	Testis	Testis	Testis	Male Reproductive System	Male Reproductive System	Male	Unknown	Unknown	Illumina NovaSeq 6000	Unknown	2021-09-27	Brown Swiss	Male	Male	Stage5
SAMEA9540541	PRJEB46995	Bos taurus	Testis	Testis	Testis	Male Reproductive System	Male Reproductive System	Male	Unknown	Unknown	Illumina NovaSeq 6000	Unknown	2021-09-27	Brown Swiss	Male	Male	Stage5
SAMEA9540542	PRJEB46995	Bos taurus	Testis	Testis	Testis	Male Reproductive System	Male Reproductive System	Male	Unknown	Unknown	Illumina NovaSeq 6000	Unknown	2021-09-27	Brown Swiss	Male	Male	Unknown
SAMEA9540543	PRJEB46995	Bos taurus	Testis	Testis	Testis	Male Reproductive System	Male Reproductive System	Male	Unknown	Unknown	Illumina NovaSeq 6000	Unknown	2021-09-27	Brown Swiss	Male	Male	Stage5
SAMEA9540544	PRJEB46995	Bos taurus	Testis	Testis	Testis	Male Reproductive System	Male Reproductive System	Male	Unknown	Unknown	Illumina NovaSeq 6000	Unknown	2021-09-27	Original_Braunvieh	Male	Male	Stage5
SAMEA9540545	PRJEB46995	Bos taurus	Testis	Testis	Testis	Male Reproductive System	Male Reproductive System	Male	Unknown	Unknown	Illumina NovaSeq 6000	Unknown	2021-09-27	Brown Swiss	Male	Male	Stage5
SAMEA9540546	PRJEB46995	Bos taurus	Testis	Testis	Testis	Male Reproductive System	Male Reproductive System	Male	Unknown	Unknown	Illumina NovaSeq 6000	Unknown	2021-09-27	Brown Swiss	Male	Male	Unknown
SAMEA9540547	PRJEB46995	Bos taurus	Testis	Testis	Testis	Male Reproductive System	Male Reproductive System	Male	Unknown	Unknown	Illumina NovaSeq 6000	Unknown	2021-09-27	Brown Swiss	Male	Male	Stage5
SAMEA9540548	PRJEB46995	Bos taurus	Testis	Testis	Testis	Male Reproductive System	Male Reproductive System	Male	Unknown	Unknown	Illumina NovaSeq 6000	Unknown	2021-09-27	Brown Swiss	Male	Male	Stage5
SAMEA9540549	PRJEB46995	Bos taurus	Testis	Testis	Testis	Male Reproductive System	Male Reproductive System	Male	Unknown	Unknown	Illumina NovaSeq 6000	Unknown	2021-09-27	Brown Swiss	Male	Male	Unknown
SAMEA9540550	PRJEB46995	Bos taurus	Testis	Testis	Testis	Male Reproductive System	Male Reproductive System	Male	Unknown	Unknown	Illumina NovaSeq 6000	Unknown	2021-09-27	Brown Swiss	Male	Male	Stage5
SAMEA9540551	PRJEB46995	Bos taurus	Testis	Testis	Testis	Male Reproductive System	Male Reproductive System	Male	Unknown	Unknown	Illumina NovaSeq 6000	Unknown	2021-09-27	Original_Braunvieh	Male	Male	Stage5
SAMEA9540552	PRJEB46995	Bos taurus	Testis	Testis	Testis	Male Reproductive System	Male Reproductive System	Male	Unknown	Unknown	Illumina NovaSeq 6000	Unknown	2021-09-27	Brown Swiss	Male	Male	Stage5
SAMEA9540553	PRJEB46995	Bos taurus	Testis	Testis	Testis	Male Reproductive System	Male Reproductive System	Male	Unknown	Unknown	Illumina NovaSeq 6000	Unknown	2021-09-27	Brown Swiss	Male	Male	Stage5
SAMEA9540554	PRJEB46995	Bos taurus	Testis	Testis	Testis	Male Reproductive System	Male Reproductive System	Male	Unknown	Unknown	Illumina NovaSeq 6000	Unknown	2021-09-27	Brown Swiss	Male	Male	Stage5
SAMEA9540555	PRJEB46995	Bos taurus	Testis	Testis	Testis	Male Reproductive System	Male Reproductive System	Male	Unknown	Unknown	Illumina NovaSeq 6000	Unknown	2021-09-27	Brown Swiss	Male	Male	Unknown
SAMEA9540556	PRJEB46995	Bos taurus	Testis	Testis	Testis	Male Reproductive System	Male Reproductive System	Male	Unknown	Unknown	Illumina NovaSeq 6000	Unknown	2021-09-27	Brown Swiss	Male	Male	Stage5
SAMEA9540557	PRJEB46995	Bos taurus	Testis	Testis	Testis	Male Reproductive System	Male Reproductive System	Male	Unknown	Unknown	Illumina NovaSeq 6000	Unknown	2021-09-27	Holstein	Male	Male	Stage5
SAMEA9540558	PRJEB46995	Bos taurus	Testis	Testis	Testis	Male Reproductive System	Male Reproductive System	Male	Unknown	Unknown	Illumina NovaSeq 6000	Unknown	2021-09-27	Original_Braunvieh	Male	Male	Stage5
SAMEA9540559	PRJEB46995	Bos taurus	Testis	Testis	Testis	Male Reproductive System	Male Reproductive System	Male	Unknown	Unknown	Illumina NovaSeq 6000	Unknown	2021-09-27	Original_Braunvieh	Male	Male	Unknown
SAMEA9540560	PRJEB46995	Bos taurus	Testis	Testis	Testis	Male Reproductive System	Male Reproductive System	Male	Unknown	Unknown	Illumina NovaSeq 6000	Unknown	2021-09-27	Original_Braunvieh	Male	Male	Stage5
SAMEA9540561	PRJEB46995	Bos taurus	Testis	Testis	Testis	Male Reproductive System	Male Reproductive System	Male	Unknown	Unknown	Illumina NovaSeq 6000	Unknown	2021-09-27	Original_Braunvieh	Male	Male	Stage5
SAMEA9540562	PRJEB46995	Bos taurus	Testis	Testis	Testis	Male Reproductive System	Male Reproductive System	Male	Unknown	Unknown	Illumina NovaSeq 6000	Unknown	2021-09-27	Original_Braunvieh	Male	Male	Unknown
SAMEA9540563	PRJEB46995	Bos taurus	Testis	Testis	Testis	Male Reproductive System	Male Reproductive System	Male	Unknown	Unknown	Illumina NovaSeq 6000	Unknown	2021-09-27	Brown Swiss	Male	Male	Stage5
SAMEA9540564	PRJEB46995	Bos taurus	Testis	Testis	Testis	Male Reproductive System	Male Reproductive System	Male	Unknown	Unknown	Illumina NovaSeq 6000	Unknown	2021-09-27	Original_Braunvieh	Male	Male	Stage5
SAMEA9540565	PRJEB46995	Bos taurus	Testis	Testis	Testis	Male Reproductive System	Male Reproductive System	Male	Unknown	Unknown	Illumina NovaSeq 6000	Unknown	2021-09-27	Original_Braunvieh	Male	Male	Stage5
SAMEA9540566	PRJEB46995	Bos taurus	Testis	Testis	Testis	Male Reproductive System	Male Reproductive System	Male	Unknown	Unknown	Illumina NovaSeq 6000	Unknown	2021-09-27	Original_Braunvieh	Male	Male	Stage5
SAMEA9540567	PRJEB46995	Bos taurus	Testis	Testis	Testis	Male Reproductive System	Male Reproductive System	Male	Unknown	Unknown	Illumina NovaSeq 6000	Unknown	2021-09-27	Original_Braunvieh	Male	Male	Stage5
SAMEA9540568	PRJEB46995	Bos taurus	Testis	Testis	Testis	Male Reproductive System	Male Reproductive System	Male	Unknown	Unknown	Illumina NovaSeq 6000	Unknown	2021-09-27	Brown Swiss	Male	Male	Stage5
SAMEA9540569	PRJEB46995	Bos taurus	Testis	Testis	Testis	Male Reproductive System	Male Reproductive System	Male	Unknown	Unknown	Illumina NovaSeq 6000	Unknown	2021-09-27	Brown Swiss	Male	Male	Stage5
SAMEA9540570	PRJEB46995	Bos taurus	Testis	Testis	Testis	Male Reproductive System	Male Reproductive System	Male	Unknown	Unknown	Illumina NovaSeq 6000	Unknown	2021-09-27	Brown Swiss	Male	Male	Stage5
SAMEA9540571	PRJEB46995	Bos taurus	Testis	Testis	Testis	Male Reproductive System	Male Reproductive System	Male	Unknown	Unknown	Illumina NovaSeq 6000	Unknown	2021-09-27	Brown Swiss	Male	Male	Stage5
SAMEA9540572	PRJEB46995	Bos taurus	Testis	Testis	Testis	Male Reproductive System	Male Reproductive System	Male	Unknown	Unknown	Illumina NovaSeq 6000	Unknown	2021-09-27	Original_Braunvieh	Male	Male	Stage5
SAMEA9540573	PRJEB46995	Bos taurus	Testis	Testis	Testis	Male Reproductive System	Male Reproductive System	Male	Unknown	Unknown	Illumina NovaSeq 6000	Unknown	2021-09-27	Brown Swiss	Male	Male	Unknown
SAMEA9540574	PRJEB46995	Bos taurus	Testis	Testis	Testis	Male Reproductive System	Male Reproductive System	Male	Unknown	Unknown	Illumina NovaSeq 6000	Unknown	2021-09-27	Original_Braunvieh	Male	Male	Stage5
SAMEA9540575	PRJEB46995	Bos taurus	Testis	Testis	Testis	Male Reproductive System	Male Reproductive System	Male	Unknown	Unknown	Illumina NovaSeq 6000	Unknown	2021-09-27	Brown Swiss	Male	Male	Unknown
SAMEA9540576	PRJEB46995	Bos taurus	Testis	Testis	Testis	Male Reproductive System	Male Reproductive System	Male	Unknown	Unknown	Illumina NovaSeq 6000	Unknown	2021-09-27	Brown Swiss	Male	Male	Stage5
SAMEA9540577	PRJEB46995	Bos taurus	Testis	Testis	Testis	Male Reproductive System	Male Reproductive System	Male	Unknown	Unknown	Illumina NovaSeq 6000	Unknown	2021-09-27	Brown Swiss	Male	Male	Stage5
SAMEA9540578	PRJEB46995	Bos taurus	Testis	Testis	Testis	Male Reproductive System	Male Reproductive System	Male	Unknown	Unknown	Illumina NovaSeq 6000	Unknown	2021-09-27	Brown Swiss	Male	Male	Stage5
SAMEA9540579	PRJEB46995	Bos taurus	Testis	Testis	Testis	Male Reproductive System	Male Reproductive System	Male	Unknown	Unknown	Illumina NovaSeq 6000	Unknown	2021-09-27	Limousin	Male	Male	Unknown
SAMEA9540580	PRJEB46995	Bos taurus	Testis	Testis	Testis	Male Reproductive System	Male Reproductive System	Male	Unknown	Unknown	Illumina NovaSeq 6000	Unknown	2021-09-27	Original_Braunvieh	Male	Male	Unknown
SAMEA9540581	PRJEB46995	Bos taurus	Testis	Testis	Testis	Male Reproductive System	Male Reproductive System	Male	Unknown	Unknown	Illumina NovaSeq 6000	Unknown	2021-09-27	Brown Swiss	Male	Male	Stage5
SAMEA9540582	PRJEB46995	Bos taurus	Testis	Testis	Testis	Male Reproductive System	Male Reproductive System	Male	Unknown	Unknown	Illumina NovaSeq 6000	Unknown	2021-09-27	Holstein	Male	Male	Stage5
SAMEA9540583	PRJEB46995	Bos taurus	Testis	Testis	Testis	Male Reproductive System	Male Reproductive System	Male	Unknown	Unknown	Illumina NovaSeq 6000	Unknown	2021-09-27	Original_Braunvieh	Male	Male	Unknown
SAMEA9540584	PRJEB46995	Bos taurus	Testis	Testis	Testis	Male Reproductive System	Male Reproductive System	Male	Unknown	Unknown	Illumina NovaSeq 6000	Unknown	2021-09-27	Brown Swiss	Male	Male	Stage5
SAMEA9540585	PRJEB46995	Bos taurus	Testis	Testis	Testis	Male Reproductive System	Male Reproductive System	Male	Unknown	Unknown	Illumina NovaSeq 6000	Unknown	2021-09-27	Brown Swiss	Male	Male	Unknown
SAMEA9540586	PRJEB46995	Bos taurus	Testis	Testis	Testis	Male Reproductive System	Male Reproductive System	Male	Unknown	Unknown	Illumina NovaSeq 6000	Unknown	2021-09-27	Holstein	Male	Male	Stage5
SAMEA9540587	PRJEB46995	Bos taurus	Testis	Testis	Testis	Male Reproductive System	Male Reproductive System	Male	Unknown	Unknown	Illumina NovaSeq 6000	Unknown	2021-09-27	Brown Swiss	Male	Male	Stage5
SAMEA9540588	PRJEB46995	Bos taurus	Testis	Testis	Testis	Male Reproductive System	Male Reproductive System	Male	Unknown	Unknown	Illumina NovaSeq 6000	Unknown	2021-09-27	Brown Swiss	Male	Male	Stage5
SAMEA9540589	PRJEB46995	Bos taurus	Testis	Testis	Testis	Male Reproductive System	Male Reproductive System	Male	Unknown	Unknown	Illumina NovaSeq 6000	Unknown	2021-09-27	Original_Braunvieh	Male	Male	Stage5
SAMEA9540590	PRJEB46995	Bos taurus	Testis	Testis	Testis	Male Reproductive System	Male Reproductive System	Male	Unknown	Unknown	Illumina NovaSeq 6000	Unknown	2021-09-27	Original_Braunvieh	Male	Male	Stage5
SAMEA9540591	PRJEB46995	Bos taurus	Testis	Testis	Testis	Male Reproductive System	Male Reproductive System	Male	Unknown	Unknown	Illumina NovaSeq 6000	Unknown	2021-09-27	Holstein	Male	Male	Stage5
SAMEA9540592	PRJEB46995	Bos taurus	Testis	Testis	Testis	Male Reproductive System	Male Reproductive System	Male	Unknown	Unknown	Illumina NovaSeq 6000	Unknown	2021-09-27	Brown Swiss	Male	Male	Stage5
SAMEA9540593	PRJEB46995	Bos taurus	Testis	Testis	Testis	Male Reproductive System	Male Reproductive System	Male	Unknown	Unknown	Illumina NovaSeq 6000	Unknown	2021-09-27	Brown Swiss	Male	Male	Unknown
SAMEA9540594	PRJEB46995	Bos taurus	Testis	Testis	Testis	Male Reproductive System	Male Reproductive System	Male	Unknown	Unknown	Illumina NovaSeq 6000	Unknown	2021-09-27	Brown Swiss	Male	Male	Stage5
SAMEA9540595	PRJEB46995	Bos taurus	Testis	Testis	Testis	Male Reproductive System	Male Reproductive System	Male	Unknown	Unknown	Illumina NovaSeq 6000	Unknown	2021-09-27	Limousin	Male	Male	Stage5
SAMEA9540596	PRJEB46995	Bos taurus	Testis	Testis	Testis	Male Reproductive System	Male Reproductive System	Male	Unknown	Unknown	Illumina NovaSeq 6000	Unknown	2021-09-27	Brown Swiss	Male	Male	Unknown
SAMEA9540597	PRJEB46995	Bos taurus	Testis	Testis	Testis	Male Reproductive System	Male Reproductive System	Male	Unknown	Unknown	Illumina NovaSeq 6000	Unknown	2021-09-27	Brown Swiss	Male	Male	Stage5
SAMEA9540598	PRJEB46995	Bos taurus	Testis	Testis	Testis	Male Reproductive System	Male Reproductive System	Male	Unknown	Unknown	Illumina NovaSeq 6000	Unknown	2021-09-27	Brown Swiss	Male	Male	Unknown
SAMEA9540599	PRJEB46995	Bos taurus	Testis	Testis	Testis	Male Reproductive System	Male Reproductive System	Male	Unknown	Unknown	Illumina NovaSeq 6000	Unknown	2021-09-27	Limousin	Male	Male	Stage5
SAMEA9540600	PRJEB46995	Bos taurus	Testis	Testis	Testis	Male Reproductive System	Male Reproductive System	Male	Unknown	Unknown	Illumina NovaSeq 6000	Unknown	2021-09-27	Brown Swiss	Male	Male	Unknown
SAMEA9540601	PRJEB46995	Bos taurus	Testis	Testis	Testis	Male Reproductive System	Male Reproductive System	Male	Unknown	Unknown	Illumina NovaSeq 6000	Unknown	2021-09-27	Brown Swiss	Male	Male	Stage5
SAMEA9540602	PRJEB46995	Bos taurus	Testis	Testis	Testis	Male Reproductive System	Male Reproductive System	Male	Unknown	Unknown	Illumina NovaSeq 6000	Unknown	2021-09-27	Brown Swiss	Male	Male	Stage5
SAMEA9540603	PRJEB46995	Bos taurus	Testis	Testis	Testis	Male Reproductive System	Male Reproductive System	Male	Unknown	Unknown	Illumina NovaSeq 6000	Unknown	2021-09-27	Brown Swiss	Male	Male	Stage5
SAMEA9540604	PRJEB46995	Bos taurus	Testis	Testis	Testis	Male Reproductive System	Male Reproductive System	Male	Unknown	Unknown	Illumina NovaSeq 6000	Unknown	2021-09-27	Original_Braunvieh	Male	Male	Stage5
SAMEA9540605	PRJEB46995	Bos taurus	Testis	Testis	Testis	Male Reproductive System	Male Reproductive System	Male	Unknown	Unknown	Illumina NovaSeq 6000	Unknown	2021-09-27	Original_Braunvieh	Male	Male	Unknown
SAMEA9540606	PRJEB46995	Bos taurus	Testis	Testis	Testis	Male Reproductive System	Male Reproductive System	Male	Unknown	Unknown	Illumina NovaSeq 6000	Unknown	2021-09-27	Brown Swiss	Male	Male	Stage5
SAMEA9540607	PRJEB46995	Bos taurus	Testis	Testis	Testis	Male Reproductive System	Male Reproductive System	Male	Unknown	Unknown	Illumina NovaSeq 6000	Unknown	2021-09-27	Original_Braunvieh	Male	Male	Stage5
SAMEA9540608	PRJEB46995	Bos taurus	Testis	Testis	Testis	Male Reproductive System	Male Reproductive System	Male	Unknown	Unknown	Illumina NovaSeq 6000	Unknown	2021-09-27	Brown Swiss	Male	Male	Stage5
SAMEA9540609	PRJEB46995	Bos taurus	Testis	Testis	Testis	Male Reproductive System	Male Reproductive System	Male	Unknown	Unknown	Illumina NovaSeq 6000	Unknown	2021-09-27	Brown Swiss	Male	Male	Stage5
SAMEA9540610	PRJEB46995	Bos taurus	Testis	Testis	Testis	Male Reproductive System	Male Reproductive System	Male	Unknown	Unknown	Illumina NovaSeq 6000	Unknown	2021-09-27	Limousin	Male	Male	Stage5
SAMEA9540611	PRJEB46995	Bos taurus	Testis	Testis	Testis	Male Reproductive System	Male Reproductive System	Male	Unknown	Unknown	Illumina NovaSeq 6000	Unknown	2021-09-27	Brown Swiss	Male	Male	Stage5
SAMEA9540612	PRJEB46995	Bos taurus	Testis	Testis	Testis	Male Reproductive System	Male Reproductive System	Male	Unknown	Unknown	Illumina NovaSeq 6000	Unknown	2021-09-27	Brown Swiss	Male	Male	Stage5
SAMN00750179	PRJNA149279	Bos grunniens	Spleen	Spleen	Spleen	Immune System	Immune System	Unknown		Yak	Illumina HiSeq 2000	Unknown	2012-01-21	Yak	Unknown	Female	Stage5
SAMN00998375	PRJNA167458	Bos taurus	Cervix	Uterus	Uterus	Female Reproductive System	Female Reproductive System	Female	Heifer	Unknown	Illumina Genome Analyzer II	Adult	2013-01-07	Charolais	Female	Female	Stage5
SAMN00998380	PRJNA167458	Bos taurus	Cervix	Uterus	Uterus	Female Reproductive System	Female Reproductive System	Female	Heifer	Unknown	Illumina Genome Analyzer II	Adult	2013-01-07	Holstein	Female	Female	Stage5
SAMN00998386	PRJNA167458	Bos taurus	Cervix	Uterus	Uterus	Female Reproductive System	Female Reproductive System	Female	Heifer	Unknown	Illumina Genome Analyzer II	Adult	2013-01-07	Charolais	Female	Female	Stage5
SAMN01766894	PRJNA177791	Bos taurus	Brain	CNS	CNS	Nervous System	Nervous System	Unknown	Unknown	Unknown	Illumina HiSeq 2000	Unknown	2015-07-22	Angus	Male	Male	Stage5
SAMN01766895	PRJNA177791	Bos taurus	Colon	Colon	Colon	Digestive System	Digestive System	Unknown	Unknown	Unknown	Illumina HiSeq 2000	Unknown	2015-07-22	Angus	Male	Male	Stage5
SAMN01766896	PRJNA177791	Bos taurus	Heart	Heart	Heart	Cardiovascular System	Cardiovascular System	Unknown	Unknown	Unknown	Illumina HiSeq 2000	Unknown	2015-07-22	Angus	Male	Male	Stage5
SAMN01766898	PRJNA177791	Bos taurus	Liver	Liver	Liver	Liver	Liver	Unknown	Unknown	Unknown	Illumina HiSeq 2000	Unknown	2015-07-22	Angus	Unknown	Male	Unknown
SAMN01766899	PRJNA177791	Bos taurus	Lung	Lung	Lung	Respiratory System	Respiratory System	Unknown	Unknown	Unknown	Illumina HiSeq 2000	Unknown	2015-07-22	Angus	Male	Male	Stage5
SAMN01766901	PRJNA177791	Bos taurus	Spleen	Spleen	Spleen	Immune System	Immune System	Unknown	Unknown	Unknown	Illumina HiSeq 2000	Unknown	2015-07-22	Angus	Male	Male	Unknown
SAMN01766902	PRJNA177791	Bos taurus	Testis	Testis	Testis	Male Reproductive System	Male Reproductive System	Male	Unknown	Unknown	Illumina HiSeq 2000	Unknown	2015-07-22	Angus	Male	Male	Stage5
SAMN01831856	PRJNA184055	Bos taurus	Liver	Liver	Liver	Liver	Liver	Unknown	Unknown	Unknown	Illumina Genome Analyzer IIx	Adult	2015-02-17	Hanwoo	Male	Male	Stage4
SAMN01831857	PRJNA184055	Bos taurus	Liver	Liver	Liver	Liver	Liver	Unknown	Unknown	Unknown	Illumina Genome Analyzer IIx	Adult	2015-02-17	Hanwoo	Male	Male	Stage4
SAMN01831951	PRJNA184055	Bos taurus	Brain	CNS	CNS	Nervous System	Nervous System	Unknown	Unknown	Unknown	Illumina Genome Analyzer IIx	Adult	2015-02-17	Hanwoo	Male	Male	Stage5
SAMN01831952	PRJNA184055	Bos taurus	Brain	CNS	CNS	Nervous System	Nervous System	Unknown	Unknown	Unknown	Illumina Genome Analyzer IIx	Adult	2015-02-17	Hanwoo	Male	Male	Stage5
SAMN01923451	PRJNA189967	Bos taurus	Blood	Blood	Blood	Immune System	Immune System	Unknown	Unknown	Unknown	Illumina HiScanSQ	Unknown	2013-02-21	Holstein	Male	Male	Stage3
SAMN02223055	PRJNA210317	Bos taurus	Blood	Blood	Blood	Immune System	Immune System	Unknown	Jersey	Jersey	Illumina Genome Analyzer IIx	Unknown	2015-07-22	Jersey	Female	Female	Stage5
SAMN02223057	PRJNA210317	Bos indicus	blood	Blood	Blood	Immune System	Immune System	Unknown	Cholistani	Cholistani	Illumina Genome Analyzer IIx	Unknown	2015-07-22	Cholistani	Unknown	Male	Unknown
SAMN02302600	PRJNA214208	Bos taurus	Hypothalamus	Hypothalamus	Hypothalamus	Nervous System	Nervous System	Unknown	Unknown	Unknown	Illumina Genome Analyzer	Unknown	2015-07-22	Simmental	Female	Male	Stage5
SAMN02302601	PRJNA214208	Bos taurus	Hypothalamus	Hypothalamus	Hypothalamus	Nervous System	Nervous System	Unknown	Unknown	Unknown	Illumina Genome Analyzer	Unknown	2015-07-22	Charolais	Female	Female	Stage5
SAMN02302602	PRJNA214208	Bos taurus	Hypothalamus	Hypothalamus	Hypothalamus	Nervous System	Nervous System	Unknown	Unknown	Unknown	Illumina Genome Analyzer	Unknown	2015-07-22	Charolais	Female	Female	Stage5
SAMN02302603	PRJNA214208	Bos taurus	Hypothalamus	Hypothalamus	Hypothalamus	Nervous System	Nervous System	Unknown	Unknown	Unknown	Illumina Genome Analyzer	Unknown	2015-07-22	Charolais	Female	Female	Stage5
SAMN02302604	PRJNA214208	Bos taurus	Hypothalamus	Hypothalamus	Hypothalamus	Nervous System	Nervous System	Unknown	Unknown	Unknown	Illumina Genome Analyzer	Unknown	2015-07-22	Charolais	Female	Male	Stage5
SAMN02302605	PRJNA214208	Bos taurus	Hypothalamus	Hypothalamus	Hypothalamus	Nervous System	Nervous System	Unknown	Unknown	Unknown	Illumina Genome Analyzer	Unknown	2015-07-22	Charolais	Female	Female	Stage5
SAMN02302606	PRJNA214208	Bos taurus	Hypothalamus	Hypothalamus	Hypothalamus	Nervous System	Nervous System	Unknown	Unknown	Unknown	Illumina Genome Analyzer	Unknown	2015-07-22	Charolais	Female	Male	Stage5
SAMN02302607	PRJNA214208	Bos taurus	Hypothalamus	Hypothalamus	Hypothalamus	Nervous System	Nervous System	Unknown	Unknown	Unknown	Illumina Genome Analyzer	Unknown	2015-07-22	Charolais	Female	Female	Stage5
SAMN02302608	PRJNA214208	Bos taurus	Hypothalamus	Hypothalamus	Hypothalamus	Nervous System	Nervous System	Unknown	Unknown	Unknown	Illumina Genome Analyzer	Unknown	2015-07-22	Holstein	Female	Female	Stage5
SAMN02302609	PRJNA214208	Bos taurus	Hypothalamus	Hypothalamus	Hypothalamus	Nervous System	Nervous System	Unknown	Unknown	Unknown	Illumina Genome Analyzer	Unknown	2015-07-22	Charolais	Female	Female	Stage5
SAMN02302610	PRJNA214208	Bos taurus	Hypothalamus	Hypothalamus	Hypothalamus	Nervous System	Nervous System	Unknown	Unknown	Unknown	Illumina Genome Analyzer	Unknown	2015-07-22	Charolais	Female	Female	Stage5
SAMN02302611	PRJNA214208	Bos taurus	Hypothalamus	Hypothalamus	Hypothalamus	Nervous System	Nervous System	Unknown	Unknown	Unknown	Illumina Genome Analyzer	Unknown	2015-07-22	Charolais	Female	Female	Stage5
SAMN02302612	PRJNA214208	Bos taurus	Hypothalamus	Hypothalamus	Hypothalamus	Nervous System	Nervous System	Unknown	Unknown	Unknown	Illumina Genome Analyzer	Unknown	2015-07-22	Charolais	Female	Female	Stage5
SAMN02302613	PRJNA214208	Bos taurus	Hypothalamus	Hypothalamus	Hypothalamus	Nervous System	Nervous System	Unknown	Unknown	Unknown	Illumina Genome Analyzer	Unknown	2015-07-22	Holstein	Female	Female	Stage5
SAMN02302614	PRJNA214208	Bos taurus	Hypothalamus	Hypothalamus	Hypothalamus	Nervous System	Nervous System	Unknown	Unknown	Unknown	Illumina Genome Analyzer	Unknown	2015-07-22	Charolais	Female	Female	Stage5
SAMN02302615	PRJNA214208	Bos taurus	Hypothalamus	Hypothalamus	Hypothalamus	Nervous System	Nervous System	Unknown	Unknown	Unknown	Illumina Genome Analyzer	Unknown	2015-07-22	Charolais	Female	Female	Stage5
SAMN02302616	PRJNA214208	Bos taurus	Hypothalamus	Hypothalamus	Hypothalamus	Nervous System	Nervous System	Unknown	Unknown	Unknown	Illumina Genome Analyzer	Unknown	2015-07-22	Charolais	Female	Female	Stage5
SAMN02302617	PRJNA214208	Bos taurus	Hypothalamus	Hypothalamus	Hypothalamus	Nervous System	Nervous System	Unknown	Unknown	Unknown	Illumina Genome Analyzer	Unknown	2015-07-22	Charolais	Female	Female	Stage5
SAMN02302618	PRJNA214208	Bos taurus	Hypothalamus	Hypothalamus	Hypothalamus	Nervous System	Nervous System	Unknown	Unknown	Unknown	Illumina Genome Analyzer	Unknown	2015-07-22	Holstein	Female	Female	Stage5
SAMN02302619	PRJNA214208	Bos taurus	Hypothalamus	Hypothalamus	Hypothalamus	Nervous System	Nervous System	Unknown	Unknown	Unknown	Illumina Genome Analyzer	Unknown	2015-07-22	Angus	Female	Female	Stage5
SAMN02302620	PRJNA214208	Bos taurus	Hypothalamus	Hypothalamus	Hypothalamus	Nervous System	Nervous System	Unknown	Unknown	Unknown	Illumina Genome Analyzer	Unknown	2015-07-22	Charolais	Female	Female	Stage5
SAMN02361029		Bos taurus	Testis	Testis	Testis	Male Reproductive System	Male Reproductive System	Male	Unknown	Unknown	Illumina Genome Analyzer IIx	Adult	2015-07-22	Angus	Male	Male	Stage5
SAMN02361030		Bos taurus	Testis	Testis	Testis	Male Reproductive System	Male Reproductive System	Male	Unknown	Unknown	Illumina Genome Analyzer IIx	Adult	2015-07-22	Angus	Male	Male	Stage5
SAMN02361031		Bos taurus	Testis	Testis	Testis	Male Reproductive System	Male Reproductive System	Male	Unknown	Unknown	Illumina Genome Analyzer IIx	Adult	2015-07-22	Angus	Male	Male	Stage2
SAMN02361203	PRJNA221163	Bos taurus	Testis	Testis	Testis	Male Reproductive System	Male Reproductive System	Male	Hereford	Hereford	Illumina HiSeq 2000	Unknown	2015-07-22	Hereford	Male	Male	Stage5
SAMN02404548	PRJNA228929	Bos taurus	Ipsilateral Uterine Horn	Uterus	Uterus	Female Reproductive System	Female Reproductive System	Female	Unknown	Unknown	Illumina Genome Analyzer IIx	Unknown	2015-07-22	Holstein	Female	Female	Stage5
SAMN02404549	PRJNA228929	Bos taurus	Ipsilateral Uterine Horn	Uterus	Uterus	Female Reproductive System	Female Reproductive System	Female	Unknown	Unknown	Illumina Genome Analyzer IIx	Unknown	2015-07-22	Holstein	Female	Female	Stage5
SAMN02404550	PRJNA228929	Bos taurus	Ipsilateral Uterine Horn	Uterus	Uterus	Female Reproductive System	Female Reproductive System	Female	Unknown	Unknown	Illumina Genome Analyzer IIx	Unknown	2015-07-22	Holstein	Female	Female	Stage5
SAMN02404551	PRJNA228929	Bos taurus	Ipsilateral Uterine Horn	Uterus	Uterus	Female Reproductive System	Female Reproductive System	Female	Unknown	Unknown	Illumina Genome Analyzer IIx	Unknown	2015-07-22	Holstein	Female	Female	Stage5
SAMN02404552	PRJNA228929	Bos taurus	Ipsilateral Uterine Horn	Uterus	Uterus	Female Reproductive System	Female Reproductive System	Female	Unknown	Unknown	Illumina Genome Analyzer IIx	Unknown	2015-07-22	Holstein	Female	Female	Stage5
SAMN02404553	PRJNA228929	Bos taurus	Ipsilateral Uterine Horn	Uterus	Uterus	Female Reproductive System	Female Reproductive System	Female	Unknown	Unknown	Illumina Genome Analyzer IIx	Unknown	2015-07-22	Holstein	Female	Female	Stage5
SAMN02404554	PRJNA228929	Bos taurus	Ipsilateral Uterine Horn	Uterus	Uterus	Female Reproductive System	Female Reproductive System	Female	Unknown	Unknown	Illumina Genome Analyzer IIx	Unknown	2015-07-22	Holstein	Female	Female	Stage5
SAMN02404555	PRJNA228929	Bos taurus	Ipsilateral Uterine Horn	Uterus	Uterus	Female Reproductive System	Female Reproductive System	Female	Unknown	Unknown	Illumina Genome Analyzer IIx	Unknown	2015-07-22	Holstein	Female	Female	Stage5
SAMN02404556	PRJNA228929	Bos taurus	Ipsilateral Uterine Horn	Uterus	Uterus	Female Reproductive System	Female Reproductive System	Female	Unknown	Unknown	Illumina Genome Analyzer IIx	Unknown	2015-07-22	Holstein	Female	Female	Stage5
SAMN02404557	PRJNA228929	Bos taurus	Ipsilateral Uterine Horn	Uterus	Uterus	Female Reproductive System	Female Reproductive System	Female	Unknown	Unknown	Illumina Genome Analyzer IIx	Unknown	2015-07-22	Holstein	Female	Female	Stage5
SAMN02404558	PRJNA228929	Bos taurus	Ipsilateral Uterine Horn	Uterus	Uterus	Female Reproductive System	Female Reproductive System	Female	Unknown	Unknown	Illumina Genome Analyzer IIx	Unknown	2015-07-22	Holstein	Female	Female	Stage5
SAMN02404559	PRJNA228929	Bos taurus	Ipsilateral Uterine Horn	Uterus	Uterus	Female Reproductive System	Female Reproductive System	Female	Unknown	Unknown	Illumina Genome Analyzer IIx	Unknown	2015-07-22	Holstein	Female	Female	Stage5
SAMN02404560	PRJNA228929	Bos taurus	Ipsilateral Uterine Horn	Uterus	Uterus	Female Reproductive System	Female Reproductive System	Female	Unknown	Unknown	Illumina Genome Analyzer IIx	Unknown	2015-07-22	Holstein	Female	Female	Stage5
SAMN02404561	PRJNA228929	Bos taurus	Ipsilateral Uterine Horn	Uterus	Uterus	Female Reproductive System	Female Reproductive System	Female	Unknown	Unknown	Illumina Genome Analyzer IIx	Unknown	2015-07-22	Holstein	Female	Female	Stage5
SAMN02666448	PRJNA239571	Bos taurus	Hypothalamus	Hypothalamus	Hypothalamus	Nervous System	Nervous System	Unknown	Brangus (3/8 Brahman x 5/8 Angus)	Angus Cross	Illumina HiSeq 2000	Unknown	2014-03-03	Angus Cross	Female	Female	Stage5
SAMN02666449	PRJNA239571	Bos taurus	Hypothalamus	Hypothalamus	Hypothalamus	Nervous System	Nervous System	Unknown	Brangus (3/8 Brahman x 5/8 Angus)	Angus Cross	Illumina HiSeq 2000	Unknown	2014-03-03	Angus Cross	Female	Female	Stage5
SAMN02666451	PRJNA239571	Bos taurus	Pituitary	Pituitary	Pituitary	Nervous System	Nervous System	Unknown	Brangus (3/8 Brahman x 5/8 Angus)	Angus Cross	Illumina HiSeq 2000	Unknown	2014-03-03	Angus Cross	Female	Female	Stage4
SAMN02666452	PRJNA239571	Bos taurus	Liver	Liver	Liver	Liver	Liver	Unknown	Brangus (3/8 Brahman x 5/8 Angus)	Angus Cross	Illumina HiSeq 2000	Unknown	2014-03-03	Angus Cross	Female	Male	Stage5
SAMN02666456	PRJNA239571	Bos taurus	Pituitary	Pituitary	Pituitary	Nervous System	Nervous System	Unknown	Brangus (3/8 Brahman x 5/8 Angus)	Angus Cross	Illumina HiSeq 2000	Unknown	2014-03-03	Angus Cross	Female	Female	Unknown
SAMN02666457	PRJNA239571	Bos taurus	Hypothalamus	Hypothalamus	Hypothalamus	Nervous System	Nervous System	Unknown	Brangus (3/8 Brahman x 5/8 Angus)	Angus Cross	Illumina HiSeq 2000	Unknown	2014-03-03	Angus Cross	Female	Female	Stage5
SAMN02666459	PRJNA239571	Bos taurus	Pituitary	Pituitary	Pituitary	Nervous System	Nervous System	Unknown	Brangus (3/8 Brahman x 5/8 Angus)	Angus Cross	Illumina HiSeq 2000	Unknown	2014-03-03	Angus Cross	Female	Female	Unknown
SAMN02666461	PRJNA239571	Bos taurus	Endometrium	Uterus	Uterus	Female Reproductive System	Female Reproductive System	Female	Brangus (3/8 Brahman x 5/8 Angus)	Angus Cross	Illumina HiSeq 2000	Unknown	2014-03-03	Angus Cross	Female	Female	Unknown
SAMN02666462	PRJNA239571	Bos taurus	Uterus	Uterus	Uterus	Female Reproductive System	Female Reproductive System	Female	Brangus (3/8 Brahman x 5/8 Angus)	Angus Cross	Illumina HiSeq 2000	Unknown	2014-03-03	Angus Cross	Female	Female	Stage1
SAMN02666464	PRJNA239571	Bos taurus	Liver	Liver	Liver	Liver	Liver	Unknown	Brangus (3/8 Brahman x 5/8 Angus)	Angus Cross	Illumina HiSeq 2000	Unknown	2014-03-03	Angus Cross	Female	Female	Stage4
SAMN02666465	PRJNA239571	Bos taurus	Liver	Liver	Liver	Liver	Liver	Unknown	Brangus (3/8 Brahman x 5/8 Angus)	Angus Cross	Illumina HiSeq 2000	Unknown	2014-03-03	Angus Cross	Female	Male	Unknown
SAMN02666468	PRJNA239571	Bos taurus	Hypothalamus	Hypothalamus	Hypothalamus	Nervous System	Nervous System	Unknown	Brangus (3/8 Brahman x 5/8 Angus)	Angus Cross	Illumina HiSeq 2000	Unknown	2014-03-03	Angus Cross	Female	Male	Stage5
SAMN02666469	PRJNA239571	Bos taurus	Uterus	Uterus	Uterus	Female Reproductive System	Female Reproductive System	Female	Brangus (3/8 Brahman x 5/8 Angus)	Angus Cross	Illumina HiSeq 2000	Unknown	2014-03-03	Angus Cross	Female	Female	Stage5
SAMN02666471	PRJNA239571	Bos taurus	Hypothalamus	Hypothalamus	Hypothalamus	Nervous System	Nervous System	Unknown	Brangus (3/8 Brahman x 5/8 Angus)	Angus Cross	Illumina HiSeq 2000	Unknown	2014-03-03	Angus Cross	Female	Female	Stage5
SAMN02666476	PRJNA239571	Bos taurus	Hypothalamus	Hypothalamus	Hypothalamus	Nervous System	Nervous System	Unknown	Brangus (3/8 Brahman x 5/8 Angus)	Angus Cross	Illumina HiSeq 2000	Unknown	2014-03-03	Angus Cross	Female	Male	Stage5
SAMN02666477	PRJNA239571	Bos taurus	Uterus	Uterus	Uterus	Female Reproductive System	Female Reproductive System	Female	Brangus (3/8 Brahman x 5/8 Angus)	Angus Cross	Illumina HiSeq 2000	Unknown	2014-03-03	Angus Cross	Female	Female	Stage1
SAMN02666478	PRJNA239571	Bos taurus	Uterus	Uterus	Uterus	Female Reproductive System	Female Reproductive System	Female	Brangus (3/8 Brahman x 5/8 Angus)	Angus Cross	Illumina HiSeq 2000	Unknown	2014-03-03	Angus Cross	Female	Female	Unknown
SAMN02666480	PRJNA239571	Bos taurus	Uterus	Uterus	Uterus	Female Reproductive System	Female Reproductive System	Female	Brangus (3/8 Brahman x 5/8 Angus)	Angus Cross	Illumina HiSeq 2000	Unknown	2014-03-03	Angus Cross	Female	Female	Unknown
SAMN02666481	PRJNA239571	Bos taurus	Pituitary	Pituitary	Pituitary	Nervous System	Nervous System	Unknown	Brangus (3/8 Brahman x 5/8 Angus)	Angus Cross	Illumina HiSeq 2000	Unknown	2014-03-03	Angus Cross	Female	Male	Unknown
SAMN02666482	PRJNA239571	Bos taurus	Pituitary	Pituitary	Pituitary	Nervous System	Nervous System	Unknown	Brangus (3/8 Brahman x 5/8 Angus)	Angus Cross	Illumina HiSeq 2000	Unknown	2014-03-03	Angus Cross	Female	Female	Stage5
SAMN02666483	PRJNA239571	Bos taurus	Uterus	Uterus	Uterus	Female Reproductive System	Female Reproductive System	Female	Brangus (3/8 Brahman x 5/8 Angus)	Angus Cross	Illumina HiSeq 2000	Unknown	2014-03-03	Angus Cross	Female	Female	Unknown
SAMN02666486	PRJNA239571	Bos taurus	Pituitary	Pituitary	Pituitary	Nervous System	Nervous System	Unknown	Brangus (3/8 Brahman x 5/8 Angus)	Angus Cross	Illumina HiSeq 2000	Unknown	2014-03-03	Angus Cross	Female	Female	Unknown
SAMN02666489	PRJNA239571	Bos taurus	Uterus	Uterus	Uterus	Female Reproductive System	Female Reproductive System	Female	Brangus (3/8 Brahman x 5/8 Angus)	Angus Cross	Illumina HiSeq 2000	Unknown	2014-03-03	Angus Cross	Female	Female	Stage5
SAMN02666497	PRJNA239571	Bos taurus	Liver	Liver	Liver	Liver	Liver	Unknown	Brangus (3/8 Brahman x 5/8 Angus)	Angus Cross	Illumina HiSeq 2000	Unknown	2014-03-03	Angus Cross	Female	Female	Unknown
SAMN02666504	PRJNA239571	Bos taurus	Liver	Liver	Liver	Liver	Liver	Unknown	Brangus (3/8 Brahman x 5/8 Angus)	Angus Cross	Illumina HiSeq 2000	Unknown	2014-03-03	Angus Cross	Female	Female	Stage5
SAMN02666505	PRJNA239571	Bos taurus	Liver	Liver	Liver	Liver	Liver	Unknown	Brangus (3/8 Brahman x 5/8 Angus)	Angus Cross	Illumina HiSeq 2000	Unknown	2014-03-03	Angus Cross	Female	Female	Stage5
SAMN02666506	PRJNA239571	Bos taurus	Liver	Liver	Liver	Liver	Liver	Unknown	Brangus (3/8 Brahman x 5/8 Angus)	Angus Cross	Illumina HiSeq 2000	Unknown	2014-03-03	Angus Cross	Female	Female	Unknown
SAMN02666508	PRJNA239571	Bos taurus	Liver	Liver	Liver	Liver	Liver	Unknown	Brangus (3/8 Brahman x 5/8 Angus)	Angus Cross	Illumina HiSeq 2000	Unknown	2014-03-03	Angus Cross	Female	Male	Stage5
SAMN02822088	PRJNA251439	Bos taurus	Liver	Liver	Liver	Liver	Liver	Female	Holstein	Holstein	Illumina HiSeq 2000	2 years	2016-01-05	Holstein	Female	Female	Stage5
SAMN02822093	PRJNA251439	Bos taurus	Brain Cerebellum	CNS	CNS	Nervous System	Nervous System	Female	Holstein	Holstein	Illumina HiSeq 2000	2 years	2014-07-17	Holstein	Female	Female	Stage5
SAMN02822094	PRJNA251439	Bos taurus	Heart	Heart	Heart	Cardiovascular System	Cardiovascular System	Female	Holstein	Holstein	Illumina HiSeq 2000	2 years	2014-07-17	Holstein	Female	Female	Stage5
SAMN02822096	PRJNA251439	Bos taurus	Lung	Lung	Lung	Respiratory System	Respiratory System	Female	Holstein	Holstein	Illumina HiSeq 2000	2 years	2014-07-17	Holstein	Female	Female	Stage5
SAMN02822105	PRJNA251439	Bos taurus	Blood	Blood	Blood	Immune System	Immune System	Female	Holstein	Holstein	Illumina HiSeq 2000	2 years	2014-07-17	Holstein	Female	Female	Stage5
SAMN02870885	PRJNA252022	Bos taurus	Pituitary	Pituitary	Pituitary	Nervous System	Nervous System	Male	NZDairyCrossBreed	Holstein Cross	Illumina HiSeq 2000	2 years	2014-12-12	Holstein Cross	Male	Male	Stage5
SAMN02870889	PRJNA252022	Bos taurus	Pituitary	Pituitary	Pituitary	Nervous System	Nervous System	Female	Unknown	Unknown	Illumina HiSeq 2000	2 years	2014-12-12	Holstein	Female	Female	Stage5
SAMN02870890	PRJNA252022	Bos taurus	Pituitary	Pituitary	Pituitary	Nervous System	Nervous System	Female	Unknown	Unknown	Illumina HiSeq 2000	2 years	2014-12-12	Holstein	Female	Female	Stage5
SAMN02870891	PRJNA252022	Bos taurus	Pituitary	Pituitary	Pituitary	Nervous System	Nervous System	Female	Unknown	Unknown	Illumina HiSeq 2000	2 years	2014-12-12	Holstein	Female	Female	Stage5
SAMN02870892	PRJNA252022	Bos taurus	Pituitary	Pituitary	Pituitary	Nervous System	Nervous System	Female	Unknown	Unknown	Illumina HiSeq 2500	2 years	2014-12-12	Holstein	Female	Female	Unknown
SAMN02870893	PRJNA252022	Bos taurus	Pituitary	Pituitary	Pituitary	Nervous System	Nervous System	Male	Unknown	Unknown	Illumina HiSeq 2000	2 years	2014-12-12	Holstein	Male	Male	Stage5
SAMN02870895	PRJNA252022	Bos taurus	Pituitary	Pituitary	Pituitary	Nervous System	Nervous System	Female	Unknown	Unknown	Illumina HiSeq 2000	2 years	2014-12-12	Holstein	Female	Female	Stage5
SAMN02870896	PRJNA252022	Bos taurus	Pituitary	Pituitary	Pituitary	Nervous System	Nervous System	Male	Unknown	Unknown	Illumina HiSeq 2000	2 years	2014-12-12	Holstein	Male	Male	Stage5
SAMN03098997	PRJNA263327	Bos taurus	Liver	Liver	Liver	Liver	Liver	Unknown	Holstein	Holstein	Illumina HiSeq 2000	Unknown	2015-10-08	Holstein	Female	Female	Stage5
SAMN03099038	PRJNA263327	Bos taurus	Liver	Liver	Liver	Liver	Liver	Unknown	Holstein	Holstein	Illumina HiSeq 2000	Unknown	2015-10-08	Holstein	Female	Female	Unknown
SAMN03099375	PRJNA263327	Bos taurus	Liver	Liver	Liver	Liver	Liver	Unknown	Holstein	Holstein	Illumina HiSeq 2000	Unknown	2015-10-08	Holstein	Female	Female	Stage5
SAMN03099530	PRJNA263327	Bos taurus	Liver	Liver	Liver	Liver	Liver	Unknown	Holstein	Holstein	Illumina HiSeq 2000	Unknown	2015-10-08	Holstein	Female	Female	Stage5
SAMN03099563	PRJNA263327	Bos taurus	Liver	Liver	Liver	Liver	Liver	Unknown	Holstein	Holstein	Illumina HiSeq 2000	Unknown	2015-10-08	Holstein	Female	Female	Stage5
SAMN03099566	PRJNA263327	Bos taurus	Liver	Liver	Liver	Liver	Liver	Unknown	Holstein	Holstein	Illumina HiSeq 2000	Unknown	2015-10-08	Holstein	Female	Female	Stage5
SAMN03099569	PRJNA263327	Bos taurus	Liver	Liver	Liver	Liver	Liver	Unknown	Holstein	Holstein	Illumina HiSeq 2000	Unknown	2015-10-08	Holstein	Female	Female	Stage5
SAMN03099573	PRJNA263327	Bos taurus	Liver	Liver	Liver	Liver	Liver	Unknown	Holstein	Holstein	Illumina HiSeq 2000	Unknown	2015-10-08	Holstein	Female	Female	Stage5
SAMN03099576	PRJNA263327	Bos taurus	Liver	Liver	Liver	Liver	Liver	Unknown	Holstein	Holstein	Illumina HiSeq 2000	Unknown	2015-10-08	Holstein	Female	Female	Stage5
SAMN03099578	PRJNA263327	Bos taurus	Liver	Liver	Liver	Liver	Liver	Unknown	Holstein	Holstein	Illumina HiSeq 2000	Unknown	2015-10-08	Holstein	Female	Female	Stage5
SAMN03099619	PRJNA263327	Bos taurus	Liver	Liver	Liver	Liver	Liver	Unknown	Holstein	Holstein	Illumina HiSeq 2000	Unknown	2015-10-08	Holstein	Female	Female	Stage5
SAMN03099622	PRJNA263327	Bos taurus	Liver	Liver	Liver	Liver	Liver	Unknown	Holstein	Holstein	Illumina HiSeq 2000	Unknown	2015-10-08	Holstein	Female	Female	Stage5
SAMN03099625	PRJNA263327	Bos taurus	Liver	Liver	Liver	Liver	Liver	Unknown	Holstein	Holstein	Illumina HiSeq 2000	Unknown	2015-10-08	Holstein	Female	Female	Stage5
SAMN03099628	PRJNA263327	Bos taurus	Liver	Liver	Liver	Liver	Liver	Unknown	Holstein	Holstein	Illumina HiSeq 2000	Unknown	2015-10-08	Holstein	Female	Female	Stage5
SAMN03099631	PRJNA263327	Bos taurus	Liver	Liver	Liver	Liver	Liver	Unknown	Holstein	Holstein	Illumina HiSeq 2000	Unknown	2015-10-08	Holstein	Unknown	Female	Stage5
SAMN03099633	PRJNA263327	Bos taurus	Liver	Liver	Liver	Liver	Liver	Unknown	Holstein	Holstein	Illumina HiSeq 2000	Unknown	2015-10-08	Holstein	Female	Female	Stage5
SAMN03145442	PRJNA379574	Bos taurus	Lymph Node	Lymph Node	Lymph Node	Immune System	Immune System	Female	Hereford	Hereford	NextSeq 500	11 years	2017-03-21	Hereford	Female	Female	Stage5
SAMN03145444	PRJNA379574	Bos taurus	Left Lung	Lung	Lung	Respiratory System	Respiratory System	Female	Hereford	Hereford	NextSeq 500	11 years	2017-03-21	Hereford	Female	Female	Stage5
SAMN03145447	PRJNA379574	Bos taurus	Mammary Gland	Mammary Gland	Mammary Gland	Mammary Gland	Mammary Gland	Female	Hereford	Hereford	NextSeq 500	11 years	2017-03-21	Hereford	Female	Female	Stage5
SAMN03145450	PRJNA379574	Bos taurus	Ventricle	Heart	Heart	Cardiovascular System	Cardiovascular System	Female	Hereford	Hereford	NextSeq 500	11 years	2017-03-21	Hereford	Female	Female	Stage5
SAMN03145458	PRJNA379574	Bos taurus	Uterine Myometrium	Uterus	Uterus	Female Reproductive System	Female Reproductive System	Female	Hereford	Hereford	NextSeq 500	11 years	2017-03-21	Hereford	Female	Female	Stage5
SAMN03145464	PRJNA263600	Bos taurus	Midbrain	CNS	CNS	Nervous System	Nervous System	Female	Hereford	Hereford	Illumina HiSeq 2000	8.5 months	2014-11-15	Hereford	Female	Female	Stage5
SAMN03145467	PRJNA379574	Bos taurus	Rumen	Rumen	Rumen	Digestive System	Digestive System	Female	Hereford	Hereford	NextSeq 500	11 years	2017-03-21	Hereford	Female	Female	Stage5
SAMN03145471	PRJNA263600	Bos taurus	Caecum	Large Intestine	Large Intestine	Digestive System	Digestive System	Female	Hereford	Hereford	Illumina HiSeq 2000	11 years	2014-11-15	Hereford	Female	Female	Stage5
SAMN03145479	PRJNA263600	Bos taurus	Corpos Epididymis	Testis	Epididymis	Male Reproductive System	Male Reproductive System	Male	Hereford	Hereford	Illumina HiSeq 2000	9 years	2014-11-15	Hereford	Male	Male	Stage5
SAMN03145482	PRJNA379574	Bos taurus	Duodenum	Duodenum	Duodenum	Digestive System	Digestive System	Female	Hereford	Hereford	NextSeq 500	11 years	2017-03-21	Hereford	Female	Female	Stage5
SAMN03145497	PRJNA263600	Bos taurus	Thalamus	CNS	CNS	Nervous System	Nervous System	Female	Hereford	Hereford	Illumina HiSeq 2000	11 years	2014-11-15	Hereford	Female	Female	Stage5
SAMN03216633	PRJNA268185	Bos taurus	Ruminal Wall	Rumen	Rumen	Digestive System	Digestive System	Unknown	Angus	Angus	Illumina HiSeq 2000	Unknown	2015-03-31	Angus	Female	Male	Stage5
SAMN03216634	PRJNA268185	Bos taurus	Ruminal Wall	Rumen	Rumen	Digestive System	Digestive System	Unknown	Angus	Angus	Illumina HiSeq 2000	Unknown	2015-03-31	Angus	Male	Male	Stage5
SAMN03216635	PRJNA268185	Bos taurus	Ruminal Wall	Rumen	Rumen	Digestive System	Digestive System	Unknown	Angus	Angus	Illumina HiSeq 2000	Unknown	2015-03-31	Angus	Female	Male	Stage5
SAMN03216636	PRJNA268185	Bos taurus	Ruminal Wall	Rumen	Rumen	Digestive System	Digestive System	Unknown	Angus	Angus	Illumina HiSeq 2000	Unknown	2015-03-31	Angus	Female	Male	Stage5
SAMN03246806	PRJNA268916	Bos indicus	Endometrial	Uterus	Uterus	Female Reproductive System	Female Reproductive System	Female	Unknown	Unknown	Illumina HiScanSQ	Unknown	2015-10-21	Brahman	Female	Female	Stage5
SAMN03246807	PRJNA268916	Bos indicus	Endometrial	Uterus	Uterus	Female Reproductive System	Female Reproductive System	Female	Unknown	Unknown	Illumina HiScanSQ	Unknown	2015-10-21	Brahman	Female	Female	Stage5
SAMN03246808	PRJNA268916	Bos indicus	Endometrial	Uterus	Uterus	Female Reproductive System	Female Reproductive System	Female	Unknown	Unknown	Illumina HiScanSQ	Unknown	2015-10-21	Brahman	Female	Female	Stage5
SAMN03246809	PRJNA268916	Bos indicus	Endometrial	Uterus	Uterus	Female Reproductive System	Female Reproductive System	Female	Unknown	Unknown	Illumina HiScanSQ	Unknown	2015-10-21	Brahman	Female	Female	Stage5
SAMN03246810	PRJNA268916	Bos indicus	Endometrial	Uterus	Uterus	Female Reproductive System	Female Reproductive System	Female	Unknown	Unknown	Illumina HiScanSQ	Unknown	2015-10-21	Brahman	Female	Female	Stage5
SAMN03246811	PRJNA268916	Bos indicus	Endometrial	Uterus	Uterus	Female Reproductive System	Female Reproductive System	Female	Unknown	Unknown	Illumina HiScanSQ	Unknown	2015-10-21	Brahman	Female	Female	Stage5
SAMN03246812	PRJNA268916	Bos indicus	Endometrial	Uterus	Uterus	Female Reproductive System	Female Reproductive System	Female	Unknown	Unknown	Illumina HiScanSQ	Unknown	2015-10-21	Brahman	Female	Female	Stage5
SAMN03246813	PRJNA268916	Bos indicus	Endometrial	Uterus	Uterus	Female Reproductive System	Female Reproductive System	Female	Unknown	Unknown	Illumina HiScanSQ	Unknown	2015-10-21	Brahman	Female	Female	Stage5
SAMN03246814	PRJNA268916	Bos indicus	Endometrial	Uterus	Uterus	Female Reproductive System	Female Reproductive System	Female	Unknown	Unknown	Illumina HiScanSQ	Unknown	2015-10-21	Brahman	Female	Female	Stage5
SAMN03246816	PRJNA268916	Bos indicus	Endometrial	Uterus	Uterus	Female Reproductive System	Female Reproductive System	Female	Unknown	Unknown	Illumina HiScanSQ	Unknown	2015-10-21	Brahman	Female	Female	Stage5
SAMN03249358	PRJNA269103	Bos indicus	Isthmus	Oviduct	Oviduct	Female Reproductive System	Female Reproductive System	Female	Nelore	Brahman	Illumina HiSeq 2500	Unknown	2015-12-03	Brahman	Female	Female	Stage5
SAMN03249359	PRJNA269103	Bos indicus	Isthmus	Oviduct	Oviduct	Female Reproductive System	Female Reproductive System	Female	Nelore	Brahman	Illumina HiSeq 2500	Unknown	2015-12-03	Brahman	Female	Female	Stage5
SAMN03249381	PRJNA269103	Bos indicus	Isthmus	Oviduct	Oviduct	Female Reproductive System	Female Reproductive System	Female	Nelore	Brahman	Illumina HiSeq 2500	Unknown	2015-12-03	Brahman	Female	Female	Stage5
SAMN03249382	PRJNA269103	Bos indicus	Isthmus	Oviduct	Oviduct	Female Reproductive System	Female Reproductive System	Female	Nelore	Brahman	Illumina HiSeq 2500	Unknown	2015-12-03	Brahman	Female	Female	Stage5
SAMN03249383	PRJNA269103	Bos indicus	Isthmus	Oviduct	Oviduct	Female Reproductive System	Female Reproductive System	Female	Nelore	Brahman	Illumina HiSeq 2500	Unknown	2015-12-03	Brahman	Female	Female	Stage5
SAMN03249384	PRJNA269103	Bos indicus	Isthmus	Oviduct	Oviduct	Female Reproductive System	Female Reproductive System	Female	Nelore	Brahman	Illumina HiSeq 2500	Unknown	2015-12-03	Brahman	Female	Female	Stage5
SAMN03266176	PRJNA270391	Bos indicus	Inter-caruncular Endometrium	Uterus	Uterus	Female Reproductive System	Female Reproductive System	Female	Nelore	Brahman	Illumina HiScanSQ	Unknown	2015-12-10	Brahman	Female	Female	Unknown
SAMN03267799	PRJNA270635	Bos taurus	Liver	Liver	Liver	Liver	Liver	Unknown	Holstein	Holstein	Illumina HiSeq 2000	Unknown	2016-12-20	Holstein	Male	Male	Unknown
SAMN03267800	PRJNA270635	Bos taurus	Liver	Liver	Liver	Liver	Liver	Unknown	Holstein	Holstein	Illumina HiSeq 2000	Unknown	2016-12-20	Holstein	Male	Male	Unknown
SAMN03267801	PRJNA270635	Bos taurus	Liver	Liver	Liver	Liver	Liver	Unknown	Holstein	Holstein	Illumina HiSeq 2000	Unknown	2016-12-20	Holstein	Male	Male	Unknown
SAMN03267802	PRJNA270635	Bos taurus	Liver	Liver	Liver	Liver	Liver	Unknown	Holstein	Holstein	Illumina HiSeq 2000	Unknown	2016-12-20	Holstein	Male	Male	Stage4
SAMN03267803	PRJNA270635	Bos taurus	Liver	Liver	Liver	Liver	Liver	Unknown	Holstein	Holstein	Illumina HiSeq 2000	Unknown	2016-12-20	Holstein	Male	Male	Stage5
SAMN03267804	PRJNA270635	Bos taurus	Liver	Liver	Liver	Liver	Liver	Unknown	Holstein	Holstein	Illumina HiSeq 2000	Unknown	2016-12-20	Holstein	Male	Male	Unknown
SAMN03267805	PRJNA270635	Bos taurus	Liver	Liver	Liver	Liver	Liver	Unknown	Holstein	Holstein	Illumina HiSeq 2000	Unknown	2016-12-20	Holstein	Male	Male	Stage4
SAMN03267806	PRJNA270635	Bos taurus	Liver	Liver	Liver	Liver	Liver	Unknown	Holstein	Holstein	Illumina HiSeq 2000	Unknown	2016-12-20	Holstein	Male	Male	Unknown
SAMN03267807	PRJNA270635	Bos taurus	Liver	Liver	Liver	Liver	Liver	Unknown	Holstein	Holstein	Illumina HiSeq 2000	Unknown	2016-12-20	Holstein	Male	Male	Stage4
SAMN03267808	PRJNA270635	Bos taurus	Liver	Liver	Liver	Liver	Liver	Unknown	Holstein	Holstein	Illumina HiSeq 2000	Unknown	2016-12-20	Holstein	Male	Male	Stage4
SAMN03267809	PRJNA270635	Bos taurus	Liver	Liver	Liver	Liver	Liver	Unknown	Holstein	Holstein	Illumina HiSeq 2000	Unknown	2016-12-20	Holstein	Male	Male	Unknown
SAMN03267810	PRJNA270635	Bos taurus	Liver	Liver	Liver	Liver	Liver	Unknown	Holstein	Holstein	Illumina HiSeq 2000	Unknown	2016-12-20	Holstein	Male	Male	Stage4
SAMN03267811	PRJNA270635	Bos taurus	Liver	Liver	Liver	Liver	Liver	Unknown	Holstein	Holstein	Illumina HiSeq 2000	Unknown	2016-12-20	Holstein	Male	Male	Unknown
SAMN03267812	PRJNA270635	Bos taurus	Liver	Liver	Liver	Liver	Liver	Unknown	Holstein	Holstein	Illumina HiSeq 2000	Unknown	2016-12-20	Holstein	Male	Male	Stage4
SAMN03267813	PRJNA270635	Bos taurus	Liver	Liver	Liver	Liver	Liver	Unknown	Holstein	Holstein	Illumina HiSeq 2000	Unknown	2016-12-20	Holstein	Male	Male	Stage4
SAMN03267814	PRJNA270635	Bos taurus	Liver	Liver	Liver	Liver	Liver	Unknown	Holstein	Holstein	Illumina HiSeq 2000	Unknown	2016-12-20	Holstein	Male	Male	Stage4
SAMN03267815	PRJNA270635	Bos taurus	Liver	Liver	Liver	Liver	Liver	Unknown	Holstein	Holstein	Illumina HiSeq 2000	Unknown	2016-12-20	Holstein	Male	Male	Stage4
SAMN03267816	PRJNA270635	Bos taurus	Liver	Liver	Liver	Liver	Liver	Unknown	Holstein	Holstein	Illumina HiSeq 2000	Unknown	2016-12-20	Holstein	Male	Male	Stage4
SAMN03267817	PRJNA270635	Bos taurus	Liver	Liver	Liver	Liver	Liver	Unknown	Holstein	Holstein	Illumina HiSeq 2000	Unknown	2016-12-20	Holstein	Male	Male	Stage4
SAMN03267818	PRJNA270635	Bos taurus	Liver	Liver	Liver	Liver	Liver	Unknown	Holstein	Holstein	Illumina HiSeq 2000	Unknown	2016-12-20	Holstein	Male	Male	Stage4
SAMN03267819	PRJNA270635	Bos taurus	Liver	Liver	Liver	Liver	Liver	Unknown	Holstein	Holstein	Illumina HiSeq 2000	Unknown	2016-12-20	Holstein	Male	Male	Stage4
SAMN03267820	PRJNA270635	Bos taurus	Liver	Liver	Liver	Liver	Liver	Unknown	Holstein	Holstein	Illumina HiSeq 2000	Unknown	2016-12-20	Holstein	Male	Male	Unknown
SAMN03267821	PRJNA270635	Bos taurus	Liver	Liver	Liver	Liver	Liver	Unknown	Holstein	Holstein	Illumina HiSeq 2000	Unknown	2016-12-20	Holstein	Male	Male	Stage4
SAMN03267822	PRJNA270635	Bos taurus	Liver	Liver	Liver	Liver	Liver	Unknown	Holstein	Holstein	Illumina HiSeq 2000	Unknown	2016-12-20	Holstein	Male	Male	Stage4
SAMN03267823	PRJNA270635	Bos taurus	Liver	Liver	Liver	Liver	Liver	Unknown	Holstein	Holstein	Illumina HiSeq 2000	Unknown	2016-12-20	Holstein	Male	Male	Stage4
SAMN03267824	PRJNA270635	Bos taurus	Liver	Liver	Liver	Liver	Liver	Unknown	Holstein	Holstein	Illumina HiSeq 2000	Unknown	2016-12-20	Holstein	Male	Male	Stage4
SAMN03267825	PRJNA270635	Bos taurus	Liver	Liver	Liver	Liver	Liver	Unknown	Holstein	Holstein	Illumina HiSeq 2000	Unknown	2016-12-20	Holstein	Male	Male	Unknown
SAMN03267826	PRJNA270635	Bos taurus	Liver	Liver	Liver	Liver	Liver	Unknown	Holstein	Holstein	Illumina HiSeq 2000	Unknown	2016-12-20	Holstein	Male	Male	Unknown
SAMN03267827	PRJNA270635	Bos taurus	Liver	Liver	Liver	Liver	Liver	Unknown	Holstein	Holstein	Illumina HiSeq 2000	Unknown	2016-12-20	Holstein	Male	Male	Stage4
SAMN03267828	PRJNA270635	Bos taurus	Liver	Liver	Liver	Liver	Liver	Unknown	Holstein	Holstein	Illumina HiSeq 2000	Unknown	2016-12-20	Holstein	Male	Male	Stage4
SAMN03267829	PRJNA270635	Bos taurus	Liver	Liver	Liver	Liver	Liver	Unknown	Holstein	Holstein	Illumina HiSeq 2000	Unknown	2016-12-20	Holstein	Male	Male	Unknown
SAMN03267830	PRJNA270635	Bos taurus	Liver	Liver	Liver	Liver	Liver	Unknown	Holstein	Holstein	Illumina HiSeq 2000	Unknown	2016-12-20	Holstein	Male	Male	Stage4
SAMN03267831	PRJNA270635	Bos taurus	Liver	Liver	Liver	Liver	Liver	Unknown	Holstein	Holstein	Illumina HiSeq 2000	Unknown	2016-12-20	Holstein	Male	Male	Unknown
SAMN03267832	PRJNA270635	Bos taurus	Liver	Liver	Liver	Liver	Liver	Unknown	Holstein	Holstein	Illumina HiSeq 2000	Unknown	2016-12-20	Holstein	Male	Male	Unknown
SAMN03267833	PRJNA270635	Bos taurus	Liver	Liver	Liver	Liver	Liver	Unknown	Holstein	Holstein	Illumina HiSeq 2000	Unknown	2016-12-20	Holstein	Male	Male	Stage4
SAMN03267834	PRJNA270635	Bos taurus	Liver	Liver	Liver	Liver	Liver	Unknown	Holstein	Holstein	Illumina HiSeq 2000	Unknown	2016-12-20	Holstein	Male	Male	Stage4
SAMN03267835	PRJNA270635	Bos taurus	Liver	Liver	Liver	Liver	Liver	Unknown	Holstein	Holstein	Illumina HiSeq 2000	Unknown	2016-12-20	Holstein	Male	Male	Stage4
SAMN03267836	PRJNA270635	Bos taurus	Liver	Liver	Liver	Liver	Liver	Unknown	Holstein	Holstein	Illumina HiSeq 2000	Unknown	2016-12-20	Holstein	Male	Male	Stage4
SAMN03267837	PRJNA270635	Bos taurus	Liver	Liver	Liver	Liver	Liver	Unknown	Holstein	Holstein	Illumina HiSeq 2000	Unknown	2016-12-20	Holstein	Male	Male	Stage4
SAMN03267838	PRJNA270635	Bos taurus	Liver	Liver	Liver	Liver	Liver	Unknown	Holstein	Holstein	Illumina HiSeq 2000	Unknown	2016-12-20	Holstein	Male	Male	Stage4
SAMN03288761	PRJNA273164	Bos taurus	Pituitary	Pituitary	Pituitary	Nervous System	Nervous System	Male	Unknown	Unknown	Illumina HiSeq 2000	Unknown	2016-01-28	Hanwoo	Male	Male	Stage4
SAMN03288763	PRJNA273164	Bos taurus	Liver	Liver	Liver	Liver	Liver	Male	Unknown	Unknown	Illumina HiSeq 2000	Unknown	2016-01-28	Hanwoo	Male	Male	Stage5
SAMN03288764	PRJNA273164	Bos taurus	Pituitary	Pituitary	Pituitary	Nervous System	Nervous System	Male	Unknown	Unknown	Illumina HiSeq 2000	Unknown	2016-01-28	Hanwoo	Male	Male	Stage5
SAMN03288767	PRJNA273164	Bos taurus	Pituitary	Pituitary	Pituitary	Nervous System	Nervous System	Male	Unknown	Unknown	Illumina HiSeq 2000	Unknown	2016-01-28	Hanwoo	Male	Male	Unknown
SAMN03288769	PRJNA273164	Bos taurus	Pituitary	Pituitary	Pituitary	Nervous System	Nervous System	Female	Unknown	Unknown	Illumina HiSeq 2000	Unknown	2016-01-28	Hanwoo	Female	Female	Stage5
SAMN03288770	PRJNA273164	Bos taurus	Liver	Liver	Liver	Liver	Liver	Female	Unknown	Unknown	Illumina HiSeq 2000	Unknown	2016-01-28	Hanwoo	Female	Female	Stage5
SAMN03288774	PRJNA273164	Bos taurus	Liver	Liver	Liver	Liver	Liver	Female	Unknown	Unknown	Illumina HiSeq 2000	Unknown	2016-01-28	Hanwoo	Female	Female	Stage5
SAMN03288777	PRJNA273164	Bos taurus	Liver	Liver	Liver	Liver	Liver	Male	Unknown	Unknown	Illumina HiSeq 2000	Unknown	2016-01-28	Hanwoo	Male	Male	Stage5
SAMN03288778	PRJNA273164	Bos taurus	Pituitary	Pituitary	Pituitary	Nervous System	Nervous System	Female	Unknown	Unknown	Illumina HiSeq 2000	Unknown	2016-01-28	Hanwoo	Female	Female	Unknown
SAMN03288783	PRJNA273164	Bos taurus	Liver	Liver	Liver	Liver	Liver	Female	Unknown	Unknown	Illumina HiSeq 2000	Unknown	2016-01-28	Hanwoo	Female	Female	Stage5
SAMN03288784	PRJNA273164	Bos taurus	Liver	Liver	Liver	Liver	Liver	Female	Unknown	Unknown	Illumina HiSeq 2000	Unknown	2016-01-28	Hanwoo	Female	Female	Stage5
SAMN03288785	PRJNA273164	Bos taurus	Liver	Liver	Liver	Liver	Liver	Female	Unknown	Unknown	Illumina HiSeq 2000	Unknown	2016-01-28	Hanwoo	Female	Female	Stage5
SAMN03288787	PRJNA273164	Bos taurus	Pituitary	Pituitary	Pituitary	Nervous System	Nervous System	Male	Unknown	Unknown	Illumina HiSeq 2000	Unknown	2016-01-28	Hanwoo	Male	Male	Stage5
SAMN03288788	PRJNA273164	Bos taurus	Liver	Liver	Liver	Liver	Liver	Male	Unknown	Unknown	Illumina HiSeq 2000	Unknown	2016-01-28	Hanwoo	Male	Male	Stage5
SAMN03288790	PRJNA273164	Bos taurus	Liver	Liver	Liver	Liver	Liver	Male	Unknown	Unknown	Illumina HiSeq 2000	Unknown	2016-01-28	Hanwoo	Male	Male	Stage5
SAMN03288791	PRJNA273164	Bos taurus	Pituitary	Pituitary	Pituitary	Nervous System	Nervous System	Female	Unknown	Unknown	Illumina HiSeq 2000	Unknown	2016-01-28	Hanwoo	Female	Female	Unknown
SAMN03288792	PRJNA273164	Bos taurus	Pituitary	Pituitary	Pituitary	Nervous System	Nervous System	Female	Unknown	Unknown	Illumina HiSeq 2000	Unknown	2016-01-28	Hanwoo	Female	Female	Stage5
SAMN03288794	PRJNA273164	Bos taurus	Pituitary	Pituitary	Pituitary	Nervous System	Nervous System	Male	Unknown	Unknown	Illumina HiSeq 2000	Unknown	2016-01-28	Hanwoo	Male	Male	Unknown
SAMN03288797	PRJNA273164	Bos taurus	Pituitary	Pituitary	Pituitary	Nervous System	Nervous System	Female	Unknown	Unknown	Illumina HiSeq 2000	Unknown	2016-01-28	Hanwoo	Female	Female	Unknown
SAMN03295207	PRJNA273618	Bos taurus	Jejunum	Jejunum	Jejunum	Digestive System	Digestive System	Male	Holstein	Holstein	Illumina HiSeq 2000	7 months	2015-08-28	Holstein	Male	Male	Stage3
SAMN03295208	PRJNA273618	Bos taurus	Jejunum	Jejunum	Jejunum	Digestive System	Digestive System	Male	Holstein	Holstein	Illumina HiSeq 2000	7 months	2015-08-28	Holstein	Male	Male	Stage3
SAMN03295209	PRJNA273618	Bos taurus	Jejunum	Jejunum	Jejunum	Digestive System	Digestive System	Male	Holstein	Holstein	Illumina HiSeq 2000	7 months	2015-08-28	Holstein	Male	Male	Stage3
SAMN03295210	PRJNA273618	Bos taurus	Jejunum	Jejunum	Jejunum	Digestive System	Digestive System	Male	Holstein	Holstein	Illumina HiSeq 2000	7 months	2015-08-28	Holstein	Male	Male	Stage3
SAMN03295211	PRJNA273618	Bos taurus	Jejunum	Jejunum	Jejunum	Digestive System	Digestive System	Male	Holstein	Holstein	Illumina HiSeq 2000	7 months	2015-08-28	Holstein	Male	Male	Stage3
SAMN03295212	PRJNA273618	Bos taurus	Jejunum	Jejunum	Jejunum	Digestive System	Digestive System	Male	Holstein	Holstein	Illumina HiSeq 2000	7 months	2015-08-28	Holstein	Male	Male	Stage3
SAMN03295213	PRJNA273618	Bos taurus	Jejunum	Jejunum	Jejunum	Digestive System	Digestive System	Male	Holstein	Holstein	Illumina HiSeq 2000	7 months	2015-08-28	Holstein	Male	Male	Stage3
SAMN03295214	PRJNA273618	Bos taurus	Jejunum	Jejunum	Jejunum	Digestive System	Digestive System	Male	Holstein	Holstein	Illumina HiSeq 2000	7 months	2015-08-28	Holstein	Male	Male	Stage3
SAMN03295216	PRJNA273618	Bos taurus	Jejunum	Jejunum	Jejunum	Digestive System	Digestive System	Male	Holstein	Holstein	Illumina HiSeq 2000	7 months	2015-08-28	Holstein	Male	Male	Stage3
SAMN03295217	PRJNA273618	Bos taurus	Jejunum	Jejunum	Jejunum	Digestive System	Digestive System	Male	Holstein	Holstein	Illumina HiSeq 2000	7 months	2015-08-28	Holstein	Male	Male	Stage3
SAMN03295218	PRJNA273618	Bos taurus	Jejunum	Jejunum	Jejunum	Digestive System	Digestive System	Male	Holstein	Holstein	Illumina HiSeq 2000	7 months	2015-08-28	Holstein	Male	Male	Stage3
SAMN03295219	PRJNA273618	Bos taurus	Jejunum	Jejunum	Jejunum	Digestive System	Digestive System	Male	Holstein	Holstein	Illumina HiSeq 2000	7 months	2015-08-28	Holstein	Male	Male	Stage3
SAMN03380732	PRJNA276762	Bos taurus	Mammary Gland	Mammary Gland	Mammary Gland	Mammary Gland	Mammary Gland	Female	Unknown	Unknown	Illumina HiSeq 2000	Unknown	2015-09-01	Holstein	Female	Female	Stage5
SAMN03401950	PRJNA278053	Bos taurus	Endometrium	Uterus	Uterus	Female Reproductive System	Female Reproductive System	Female	Holstein	Holstein	Illumina HiSeq 2000	Unknown	2015-08-02	Holstein	Female	Female	Stage5
SAMN03401951	PRJNA278053	Bos taurus	Endometrium	Uterus	Uterus	Female Reproductive System	Female Reproductive System	Female	Holstein	Holstein	Illumina HiSeq 2000	Unknown	2015-08-02	Holstein	Female	Female	Stage5
SAMN03401953	PRJNA278053	Bos taurus	Endometrium	Uterus	Uterus	Female Reproductive System	Female Reproductive System	Female	Holstein	Holstein	Illumina HiSeq 2000	Unknown	2015-08-02	Holstein	Female	Female	Stage5
SAMN03401958	PRJNA278053	Bos taurus	Endometrium	Uterus	Uterus	Female Reproductive System	Female Reproductive System	Female	Holstein	Holstein	Illumina HiSeq 2000	Unknown	2015-08-02	Holstein	Female	Female	Stage5
SAMN03401966	PRJNA278053	Bos taurus	Endometrium	Uterus	Uterus	Female Reproductive System	Female Reproductive System	Female	Holstein	Holstein	Illumina HiSeq 2000	Unknown	2015-08-02	Holstein	Female	Female	Stage5
SAMN03401973	PRJNA278053	Bos taurus	Endometrium	Uterus	Uterus	Female Reproductive System	Female Reproductive System	Female	Holstein	Holstein	Illumina HiSeq 2000	Unknown	2015-08-02	Holstein	Female	Female	Stage5
SAMN03401974	PRJNA278053	Bos taurus	Endometrium	Uterus	Uterus	Female Reproductive System	Female Reproductive System	Female	Holstein	Holstein	Illumina HiSeq 2000	Unknown	2015-08-02	Holstein	Female	Female	Stage5
SAMN03401978	PRJNA278053	Bos taurus	Endometrium	Uterus	Uterus	Female Reproductive System	Female Reproductive System	Female	Holstein	Holstein	Illumina HiSeq 2000	Unknown	2015-08-02	Holstein	Female	Female	Stage5
SAMN03401979	PRJNA278053	Bos taurus	Endometrium	Uterus	Uterus	Female Reproductive System	Female Reproductive System	Female	Holstein	Holstein	Illumina HiSeq 2000	Unknown	2015-08-02	Holstein	Female	Female	Stage5
SAMN03401981	PRJNA278053	Bos taurus	Endometrium	Uterus	Uterus	Female Reproductive System	Female Reproductive System	Female	Holstein	Holstein	Illumina HiSeq 2000	Unknown	2015-08-02	Holstein	Female	Female	Stage5
SAMN03401986	PRJNA278053	Bos taurus	Endometrium	Uterus	Uterus	Female Reproductive System	Female Reproductive System	Female	Holstein	Holstein	Illumina HiSeq 2000	Unknown	2015-08-02	Holstein	Female	Female	Stage5
SAMN03401988	PRJNA278053	Bos taurus	Endometrium	Uterus	Uterus	Female Reproductive System	Female Reproductive System	Female	Holstein	Holstein	Illumina HiSeq 2000	Unknown	2015-08-02	Holstein	Female	Female	Stage5
SAMN03401994	PRJNA278053	Bos taurus	Endometrium	Uterus	Uterus	Female Reproductive System	Female Reproductive System	Female	Holstein	Holstein	Illumina HiSeq 2000	Unknown	2015-08-02	Holstein	Female	Female	Stage5
SAMN03402004	PRJNA278053	Bos taurus	Endometrium	Uterus	Uterus	Female Reproductive System	Female Reproductive System	Female	Holstein	Holstein	Illumina HiSeq 2000	Unknown	2015-08-02	Holstein	Female	Female	Stage5
SAMN03402007	PRJNA278053	Bos taurus	Endometrium	Uterus	Uterus	Female Reproductive System	Female Reproductive System	Female	Holstein	Holstein	Illumina HiSeq 2000	Unknown	2015-08-02	Holstein	Female	Female	Unknown
SAMN03430957	PRJNA272725	Bos taurus	Bronchial Node	Lymph Node	Lymph Node	Immune System	Immune System	Male	Angus - Hereford	Angus Cross	Illumina HiSeq 2000	Unknown	2015-04-08	Angus Cross	Male	Male	Stage3
SAMN03430958	PRJNA272725	Bos taurus	Bronchial Node	Lymph Node	Lymph Node	Immune System	Immune System	Male	Angus - Hereford	Angus Cross	Illumina HiSeq 2000	Unknown	2015-04-08	Angus Cross	Male	Male	Stage3
SAMN03430959	PRJNA272725	Bos taurus	Bronchial Node	Lymph Node	Lymph Node	Immune System	Immune System	Male	Angus - Hereford	Angus Cross	Illumina HiSeq 2000	Unknown	2015-04-08	Angus Cross	Male	Male	Stage3
SAMN03430960	PRJNA272725	Bos taurus	Bronchial Node	Lymph Node	Lymph Node	Immune System	Immune System	Male	Angus - Hereford	Angus Cross	Illumina HiSeq 2000	Unknown	2015-04-08	Angus Cross	Male	Male	Stage3
SAMN03481149	PRJNA280965	Bos indicus	Endometrium	Uterus	Uterus	Female Reproductive System	Female Reproductive System	Female	Nelore	Brahman	Illumina HiScanSQ	Unknown	2017-12-06	Brahman	Female	Female	Stage5
SAMN03481150	PRJNA280965	Bos indicus	Endometrium	Uterus	Uterus	Female Reproductive System	Female Reproductive System	Female	Nelore	Brahman	Illumina HiScanSQ	Unknown	2017-12-06	Brahman	Female	Female	Unknown
SAMN03481151	PRJNA280965	Bos indicus	Endometrium	Uterus	Uterus	Female Reproductive System	Female Reproductive System	Female	Nelore	Brahman	Illumina HiScanSQ	Unknown	2017-12-06	Brahman	Female	Female	Unknown
SAMN03481152	PRJNA280965	Bos indicus	Endometrium	Uterus	Uterus	Female Reproductive System	Female Reproductive System	Female	Nelore	Brahman	Illumina HiScanSQ	Unknown	2017-12-06	Brahman	Female	Female	Unknown
SAMN03481153	PRJNA280965	Bos indicus	Endometrium	Uterus	Uterus	Female Reproductive System	Female Reproductive System	Female	Nelore	Brahman	Illumina HiScanSQ	Unknown	2017-12-06	Brahman	Female	Female	Stage5
SAMN03481154	PRJNA280965	Bos indicus	Endometrium	Uterus	Uterus	Female Reproductive System	Female Reproductive System	Female	Nelore	Brahman	Illumina HiScanSQ	Unknown	2017-12-06	Brahman	Female	Female	Stage5
SAMN03481155	PRJNA280965	Bos indicus	Endometrium	Uterus	Uterus	Female Reproductive System	Female Reproductive System	Female	Nelore	Brahman	Illumina HiScanSQ	Unknown	2017-12-06	Brahman	Female	Female	Unknown
SAMN03481156	PRJNA280965	Bos indicus	Endometrium	Uterus	Uterus	Female Reproductive System	Female Reproductive System	Female	Nelore	Brahman	Illumina HiScanSQ	Unknown	2017-12-06	Brahman	Female	Female	Unknown
SAMN03481157	PRJNA280965	Bos indicus	Endometrium	Uterus	Uterus	Female Reproductive System	Female Reproductive System	Female	Nelore	Brahman	Illumina HiScanSQ	Unknown	2017-12-06	Brahman	Female	Female	Unknown
SAMN03481158	PRJNA280965	Bos indicus	Endometrium	Uterus	Uterus	Female Reproductive System	Female Reproductive System	Female	Nelore	Brahman	Illumina HiScanSQ	Unknown	2017-12-06	Brahman	Female	Female	Stage5
SAMN03481160	PRJNA280965	Bos indicus	Endometrium	Uterus	Uterus	Female Reproductive System	Female Reproductive System	Female	Nelore	Brahman	Illumina HiScanSQ	Unknown	2017-12-06	Brahman	Female	Female	Unknown
SAMN03758624	PRJNA285675	Bos taurus	Endometrium	Uterus	Uterus	Female Reproductive System	Female Reproductive System	Female	Holstein	Holstein	Illumina HiSeq 2000	Unknown	2015-07-07	Holstein	Female	Female	Unknown
SAMN03758625	PRJNA285675	Bos taurus	Endometrium	Uterus	Uterus	Female Reproductive System	Female Reproductive System	Female	Holstein	Holstein	Illumina HiSeq 2000	Unknown	2015-07-07	Holstein	Female	Female	Unknown
SAMN03758626	PRJNA285675	Bos taurus	Endometrium	Uterus	Uterus	Female Reproductive System	Female Reproductive System	Female	Holstein	Holstein	Illumina HiSeq 2000	Unknown	2015-07-07	Holstein	Female	Female	Stage5
SAMN03758627	PRJNA285675	Bos taurus	Endometrium	Uterus	Uterus	Female Reproductive System	Female Reproductive System	Female	Holstein	Holstein	Illumina HiSeq 2000	Unknown	2015-07-07	Holstein	Female	Female	Unknown
SAMN03758630	PRJNA285675	Bos taurus	Endometrium	Uterus	Uterus	Female Reproductive System	Female Reproductive System	Female	Holstein	Holstein	Illumina HiSeq 2000	Unknown	2015-07-07	Holstein	Female	Female	Stage5
SAMN03758631	PRJNA285675	Bos taurus	Endometrium	Uterus	Uterus	Female Reproductive System	Female Reproductive System	Female	Holstein	Holstein	Illumina HiSeq 2000	Unknown	2015-07-07	Holstein	Female	Female	Stage5
SAMN03758633	PRJNA285675	Bos taurus	Endometrium	Uterus	Uterus	Female Reproductive System	Female Reproductive System	Female	Holstein	Holstein	Illumina HiSeq 2000	Unknown	2015-07-07	Holstein	Female	Female	Stage5
SAMN03758636	PRJNA285675	Bos taurus	Endometrium	Uterus	Uterus	Female Reproductive System	Female Reproductive System	Female	Holstein	Holstein	Illumina HiSeq 2000	Unknown	2015-07-07	Holstein	Female	Female	Unknown
SAMN03758637	PRJNA285675	Bos taurus	Endometrium	Uterus	Uterus	Female Reproductive System	Female Reproductive System	Female	Holstein	Holstein	Illumina HiSeq 2000	Unknown	2015-07-07	Holstein	Female	Female	Unknown
SAMN03801558	PRJNA288537	Bos indicus	Blood	Blood	Blood	Immune System	Immune System	Male	Malnad Gidda	Malnad Gidda	Illumina HiSeq 2000	Unknown	2015-12-31	Malnad Gidda	Male	Male	Stage5
SAMN03890950	PRJNA290388	Bos taurus	Ileocecal Valve	Large Intestine	Large Intestine	Digestive System	Digestive System	Female	Holstein	Holstein	Illumina HiSeq 2500	Adult	2015-09-29	Holstein	Female	Female	Stage5
SAMN03890951	PRJNA290388	Bos taurus	Ileocecal Valve	Large Intestine	Large Intestine	Digestive System	Digestive System	Female	Holstein	Holstein	Illumina HiSeq 2500	Unknown	2015-09-29	Holstein	Female	Female	Stage5
SAMN03890952	PRJNA290388	Bos taurus	Ileocecal Valve	Large Intestine	Large Intestine	Digestive System	Digestive System	Female	Holstein	Holstein	Illumina HiSeq 2500	Unknown	2015-09-29	Holstein	Female	Female	Stage5
SAMN03890953	PRJNA290388	Bos taurus	Ileocecal Valve	Large Intestine	Large Intestine	Digestive System	Digestive System	Female	Holstein	Holstein	Illumina HiSeq 2500	Unknown	2015-09-29	Holstein	Female	Female	Stage5
SAMN03890954	PRJNA290388	Bos taurus	Ileocecal Valve	Large Intestine	Large Intestine	Digestive System	Digestive System	Female	Holstein	Holstein	Illumina HiSeq 2500	Unknown	2015-09-29	Holstein	Female	Female	Stage5
SAMN03890955	PRJNA290388	Bos taurus	Ileocecal Valve	Large Intestine	Large Intestine	Digestive System	Digestive System	Female	Holstein	Holstein	Illumina HiSeq 2500	Unknown	2015-09-29	Holstein	Female	Female	Stage5
SAMN03890956	PRJNA290388	Bos taurus	Ileocecal Valve	Large Intestine	Large Intestine	Digestive System	Digestive System	Female	Holstein	Holstein	Illumina HiSeq 2500	Unknown	2015-09-29	Holstein	Female	Female	Stage5
SAMN03890957	PRJNA290388	Bos taurus	Ileocecal Valve	Large Intestine	Large Intestine	Digestive System	Digestive System	Female	Holstein	Holstein	Illumina HiSeq 2500	Unknown	2015-09-29	Holstein	Female	Female	Stage5
SAMN03890958	PRJNA290388	Bos taurus	Ileocecal Valve	Large Intestine	Large Intestine	Digestive System	Digestive System	Female	Holstein	Holstein	Illumina HiSeq 2500	Unknown	2015-09-29	Holstein	Female	Female	Stage5
SAMN03890959	PRJNA290388	Bos taurus	Ileocecal Valve	Large Intestine	Large Intestine	Digestive System	Digestive System	Female	Holstein	Holstein	Illumina HiSeq 2500	Unknown	2015-09-29	Holstein	Female	Female	Stage5
SAMN03890960	PRJNA290388	Bos taurus	Ileocecal Valve	Large Intestine	Large Intestine	Digestive System	Digestive System	Female	Holstein	Holstein	Illumina HiSeq 2500	Unknown	2015-09-29	Holstein	Female	Female	Stage5
SAMN03890961	PRJNA290388	Bos taurus	Ileocecal Valve	Large Intestine	Large Intestine	Digestive System	Digestive System	Female	Holstein	Holstein	Illumina HiSeq 2500	Unknown	2015-09-29	Holstein	Female	Female	Stage5
SAMN03890962	PRJNA290388	Bos taurus	Ileocecal Valve	Large Intestine	Large Intestine	Digestive System	Digestive System	Female	Holstein	Holstein	Illumina HiSeq 2500	Unknown	2015-09-29	Holstein	Female	Female	Stage5
SAMN03890963	PRJNA290388	Bos taurus	Ileocecal Valve	Large Intestine	Large Intestine	Digestive System	Digestive System	Female	Holstein	Holstein	Illumina HiSeq 2500	Unknown	2015-09-29	Holstein	Female	Female	Stage5
SAMN03890964	PRJNA290388	Bos taurus	Ileocecal Valve	Large Intestine	Large Intestine	Digestive System	Digestive System	Female	Holstein	Holstein	Illumina HiSeq 2500	Unknown	2015-09-29	Holstein	Female	Female	Stage5
SAMN03892177	PRJNA290465	Bos taurus	Rumen Papillae	Rumen	Rumen	Digestive System	Digestive System	Male	Crossbred	Crossbred	Illumina Genome Analyzer II	344?8 days	2015-07-23	Crossbred	Male	Male	Stage5
SAMN03892178	PRJNA290465	Bos taurus	Rumen Papillae	Rumen	Rumen	Digestive System	Digestive System	Male	Crossbred	Crossbred	Illumina Genome Analyzer II	344?8 days	2015-07-23	Crossbred	Male	Male	Stage5
SAMN03892179	PRJNA290465	Bos taurus	Rumen Papillae	Rumen	Rumen	Digestive System	Digestive System	Male	Crossbred	Crossbred	Illumina Genome Analyzer II	344?8 days	2015-07-23	Crossbred	Male	Male	Stage5
SAMN03892180	PRJNA290465	Bos taurus	Rumen Papillae	Rumen	Rumen	Digestive System	Digestive System	Male	Crossbred	Crossbred	Illumina Genome Analyzer II	344?8 days	2015-07-23	Crossbred	Male	Male	Stage5
SAMN03892181	PRJNA290465	Bos taurus	Rumen Papillae	Rumen	Rumen	Digestive System	Digestive System	Male	Crossbred	Crossbred	Illumina Genome Analyzer II	344?8 days	2015-07-23	Crossbred	Male	Male	Stage5
SAMN03892182	PRJNA290465	Bos taurus	Rumen Papillae	Rumen	Rumen	Digestive System	Digestive System	Male	Crossbred	Crossbred	Illumina Genome Analyzer II	344?8 days	2015-07-23	Crossbred	Male	Male	Stage5
SAMN03892183	PRJNA290465	Bos taurus	Rumen Papillae	Rumen	Rumen	Digestive System	Digestive System	Male	Crossbred	Crossbred	Illumina Genome Analyzer II	344?8 days	2015-07-23	Crossbred	Male	Male	Stage5
SAMN03892184	PRJNA290465	Bos taurus	Rumen Papillae	Rumen	Rumen	Digestive System	Digestive System	Male	Crossbred	Crossbred	Illumina Genome Analyzer II	344?8 days	2015-07-23	Crossbred	Male	Male	Stage5
SAMN03892185	PRJNA290465	Bos taurus	Rumen Papillae	Rumen	Rumen	Digestive System	Digestive System	Male	Crossbred	Crossbred	Illumina Genome Analyzer II	344?8 days	2015-07-23	Crossbred	Male	Male	Stage5
SAMN03892186	PRJNA290465	Bos taurus	Rumen Papillae	Rumen	Rumen	Digestive System	Digestive System	Male	Crossbred	Crossbred	Illumina Genome Analyzer II	344?8 days	2015-07-23	Crossbred	Male	Male	Stage5
SAMN03892187	PRJNA290465	Bos taurus	Rumen Papillae	Rumen	Rumen	Digestive System	Digestive System	Male	Crossbred	Crossbred	Illumina Genome Analyzer II	344?8 days	2015-07-23	Crossbred	Male	Male	Stage5
SAMN03892188	PRJNA290465	Bos taurus	Rumen Papillae	Rumen	Rumen	Digestive System	Digestive System	Male	Crossbred	Crossbred	Illumina Genome Analyzer II	344?8 days	2015-07-23	Crossbred	Male	Male	Stage5
SAMN03892189	PRJNA290465	Bos taurus	Rumen Papillae	Rumen	Rumen	Digestive System	Digestive System	Male	Crossbred	Crossbred	Illumina Genome Analyzer II	344?8 days	2015-07-23	Crossbred	Male	Male	Stage5
SAMN03892190	PRJNA290465	Bos taurus	Rumen Papillae	Rumen	Rumen	Digestive System	Digestive System	Male	Crossbred	Crossbred	Illumina Genome Analyzer II	344?8 days	2015-07-23	Crossbred	Male	Male	Stage5
SAMN03892191	PRJNA290465	Bos taurus	Rumen Papillae	Rumen	Rumen	Digestive System	Digestive System	Male	Crossbred	Crossbred	Illumina Genome Analyzer II	344?8 days	2015-07-23	Crossbred	Male	Male	Stage5
SAMN03892192	PRJNA290465	Bos taurus	Rumen Papillae	Rumen	Rumen	Digestive System	Digestive System	Male	Crossbred	Crossbred	Illumina Genome Analyzer II	344?8 days	2015-07-23	Crossbred	Male	Male	Stage5
SAMN04019641	PRJNA294306	Bos taurus	Endometrium	Uterus	Liver	Female Reproductive System	Liver	Female	Hereford	Hereford	Illumina HiSeq 2000	Unknown	2015-09-15	Hereford	Female	Female	Stage5
SAMN04019647	PRJNA294306	Bos taurus	Spleen	Spleen	Spleen	Immune System	Immune System	Female	Hereford	Hereford	Illumina HiSeq 2000	Unknown	2015-09-15	Hereford	Female	Female	Stage5
SAMN04019648	PRJNA294306	Bos taurus	Ileum	Ileum	Ileum	Digestive System	Digestive System	Female	Hereford	Hereford	Illumina HiSeq 2000	Unknown	2015-09-15	Hereford	Female	Female	Stage5
SAMN04019649	PRJNA294306	Bos taurus	Jejunum	Jejunum	Jejunum	Digestive System	Digestive System	Female	Hereford	Hereford	Illumina HiSeq 2000	Unknown	2015-09-15	Hereford	Female	Female	Stage5
SAMN04019658	PRJNA294306	Bos taurus	Antirior Pituitary	Pituitary	Pituitary	Nervous System	Nervous System	Female	Hereford	Hereford	Illumina HiSeq 2000	Unknown	2015-09-15	Hereford	Female	Female	Stage5
SAMN04091479	PRJNA272725	Bos taurus	Lung Healthy	Lung	Lung	Respiratory System	Respiratory System	Unknown	Angus - Hereford	Angus Cross	Illumina HiSeq 2500	Unknown	2015-04-08	Angus Cross	Male	Male	Stage5
SAMN04091480	PRJNA272725	Bos taurus	Lung Healthy	Lung	Lung	Respiratory System	Respiratory System	Unknown	Angus - Hereford	Angus Cross	Illumina HiSeq 2500	Unknown	2015-04-08	Angus Cross	Male	Male	Unknown
SAMN04091481	PRJNA272725	Bos taurus	Lung Healthy	Lung	Lung	Respiratory System	Respiratory System	Unknown	Angus - Hereford	Angus Cross	Illumina HiSeq 2500	Unknown	2015-04-08	Angus Cross	Male	Male	Unknown
SAMN04091482	PRJNA272725	Bos taurus	Lung Healthy	Lung	Lung	Respiratory System	Respiratory System	Unknown	Angus - Hereford	Angus Cross	Illumina HiSeq 2500	Unknown	2015-04-08	Angus Cross	Male	Male	Stage5
SAMN04091484	PRJNA272725	Bos taurus	Lung Healthy	Lung	Lung	Respiratory System	Respiratory System	Unknown	Angus - Hereford	Angus Cross	Illumina HiSeq 2500	Unknown	2015-04-08	Angus Cross	Male	Male	Stage5
SAMN04091486	PRJNA272725	Bos taurus	Lung Healthy	Lung	Lung	Respiratory System	Respiratory System	Unknown	Angus - Hereford	Angus Cross	Illumina HiSeq 2500	Unknown	2015-04-08	Angus Cross	Male	Male	Stage5
SAMN04091487	PRJNA272725	Bos taurus	Lung Healthy	Lung	Lung	Respiratory System	Respiratory System	Unknown	Angus - Hereford	Angus Cross	Illumina HiSeq 2500	Unknown	2015-04-08	Angus Cross	Male	Male	Unknown
SAMN04091490	PRJNA272725	Bos taurus	Lung Healthy	Lung	Lung	Respiratory System	Respiratory System	Unknown	Angus - Hereford	Angus Cross	Illumina HiSeq 2500	Unknown	2015-04-08	Angus Cross	Male	Male	Unknown
SAMN04091491	PRJNA272725	Bos taurus	Lung Healthy	Lung	Lung	Respiratory System	Respiratory System	Unknown	Angus - Hereford	Angus Cross	Illumina HiSeq 2500	Unknown	2015-04-08	Angus Cross	Male	Male	Stage5
SAMN04091492	PRJNA272725	Bos taurus	Lung Healthy	Lung	Lung	Respiratory System	Respiratory System	Unknown	Angus - Hereford	Angus Cross	Illumina HiSeq 2500	Unknown	2015-04-08	Angus Cross	Male	Male	Stage5
SAMN04091493	PRJNA272725	Bos taurus	Lung Healthy	Lung	Lung	Respiratory System	Respiratory System	Unknown	Angus - Hereford	Angus Cross	Illumina HiSeq 2500	Unknown	2015-04-08	Angus Cross	Male	Male	Stage5
SAMN04091494	PRJNA272725	Bos taurus	Lung Healthy	Lung	Lung	Respiratory System	Respiratory System	Unknown	Angus - Hereford	Angus Cross	Illumina HiSeq 2500	Unknown	2015-04-08	Angus Cross	Male	Male	Stage5
SAMN04091495	PRJNA272725	Bos taurus	Lung Healthy	Lung	Lung	Respiratory System	Respiratory System	Unknown	Angus - Hereford	Angus Cross	Illumina HiSeq 2500	Unknown	2015-04-08	Angus Cross	Male	Male	Stage5
SAMN04091497	PRJNA272725	Bos taurus	Lung Healthy	Lung	Lung	Respiratory System	Respiratory System	Unknown	Angus - Hereford	Angus Cross	Illumina HiSeq 2500	Unknown	2015-04-08	Angus Cross	Male	Male	Stage5
SAMN04091500	PRJNA272725	Bos taurus	Lung Lessions	Lung	Lung	Respiratory System	Respiratory System	Unknown	Angus - Hereford	Angus Cross	Illumina HiSeq 2500	Unknown	2015-04-08	Angus Cross	Male	Male	Stage5
SAMN04091501	PRJNA272725	Bos taurus	Lung Lessions	Lung	Lung	Respiratory System	Respiratory System	Unknown	Angus - Hereford	Angus Cross	Illumina HiSeq 2500	Unknown	2015-04-08	Angus Cross	Male	Male	Stage5
SAMN04091506	PRJNA272725	Bos taurus	Lung Lessions	Lung	Lung	Respiratory System	Respiratory System	Unknown	Angus - Hereford	Angus Cross	Illumina HiSeq 2500	Unknown	2015-04-08	Angus Cross	Male	Male	Unknown
SAMN04091508	PRJNA272725	Bos taurus	Lung Lessions	Lung	Lung	Respiratory System	Respiratory System	Unknown	Angus - Hereford	Angus Cross	Illumina HiSeq 2500	Unknown	2015-04-08	Angus Cross	Male	Male	Unknown
SAMN04091511	PRJNA272725	Bos taurus	Lung Lessions	Lung	Lung	Respiratory System	Respiratory System	Unknown	Angus - Hereford	Angus Cross	Illumina HiSeq 2500	Unknown	2015-04-08	Angus Cross	Male	Male	Stage5
SAMN04091512	PRJNA272725	Bos taurus	Lung Lessions	Lung	Lung	Respiratory System	Respiratory System	Unknown	Angus - Hereford	Angus Cross	Illumina HiSeq 2500	Unknown	2015-04-08	Angus Cross	Male	Male	Unknown
SAMN04091515	PRJNA272725	Bos taurus	Lung Lessions	Lung	Lung	Respiratory System	Respiratory System	Unknown	Angus - Hereford	Angus Cross	Illumina HiSeq 2500	Unknown	2015-04-08	Angus Cross	Male	Male	Stage2
SAMN04091519	PRJNA272725	Bos taurus	Lung Lessions	Lung	Lung	Respiratory System	Respiratory System	Unknown	Angus - Hereford	Angus Cross	Illumina HiSeq 2500	Unknown	2015-04-08	Angus Cross	Male	Male	Stage5
SAMN04091521	PRJNA272725	Bos taurus	Lung Lessions	Lung	Lung	Respiratory System	Respiratory System	Unknown	Angus - Hereford	Angus Cross	Illumina HiSeq 2500	Unknown	2015-04-08	Angus Cross	Male	Male	Stage5
SAMN04091522	PRJNA272725	Bos taurus	Lung Lessions	Lung	Lung	Respiratory System	Respiratory System	Unknown	Angus - Hereford	Angus Cross	Illumina HiSeq 2500	Unknown	2015-04-08	Angus Cross	Male	Male	Unknown
SAMN04091569	PRJNA272725	Bos taurus	Retropharyngeal Nodes	Lymph Node	Lymph Node	Immune System	Immune System	Unknown	Angus - Hereford	Angus Cross	Illumina HiSeq 2500	Unknown	2015-04-08	Angus Cross	Male	Male	Stage2
SAMN04091570	PRJNA272725	Bos taurus	Retropharyngeal Nodes	Lymph Node	Lymph Node	Immune System	Immune System	Unknown	Angus - Hereford	Angus Cross	Illumina HiSeq 2500	Unknown	2015-04-08	Angus Cross	Male	Male	Unknown
SAMN04091571	PRJNA272725	Bos taurus	Retropharyngeal Nodes	Lymph Node	Lymph Node	Immune System	Immune System	Unknown	Angus - Hereford	Angus Cross	Illumina HiSeq 2500	Unknown	2015-04-08	Angus Cross	Male	Male	Stage2
SAMN04091572	PRJNA272725	Bos taurus	Retropharyngeal Nodes	Lymph Node	Lymph Node	Immune System	Immune System	Unknown	Angus - Hereford	Angus Cross	Illumina HiSeq 2500	Unknown	2015-04-08	Angus Cross	Male	Male	Unknown
SAMN04091573	PRJNA272725	Bos taurus	Retropharyngeal Nodes	Lymph Node	Lymph Node	Immune System	Immune System	Unknown	Angus - Hereford	Angus Cross	Illumina HiSeq 2500	Unknown	2015-04-08	Angus Cross	Male	Male	Stage3
SAMN04091574	PRJNA272725	Bos taurus	Retropharyngeal Nodes	Lymph Node	Lymph Node	Immune System	Immune System	Unknown	Angus - Hereford	Angus Cross	Illumina HiSeq 2500	Unknown	2015-04-08	Angus Cross	Male	Male	Stage3
SAMN04091575	PRJNA272725	Bos taurus	Retropharyngeal Nodes	Lymph Node	Lymph Node	Immune System	Immune System	Unknown	Angus - Hereford	Angus Cross	Illumina HiSeq 2500	Unknown	2015-04-08	Angus Cross	Male	Male	Stage3
SAMN04091576	PRJNA272725	Bos taurus	Retropharyngeal Nodes	Lymph Node	Lymph Node	Immune System	Immune System	Unknown	Angus - Hereford	Angus Cross	Illumina HiSeq 2500	Unknown	2015-04-08	Angus Cross	Male	Male	Stage3
SAMN04091577	PRJNA272725	Bos taurus	Retropharyngeal Nodes	Lymph Node	Lymph Node	Immune System	Immune System	Unknown	Angus - Hereford	Angus Cross	Illumina HiSeq 2500	Unknown	2015-04-08	Angus Cross	Male	Male	Stage3
SAMN04091578	PRJNA272725	Bos taurus	Retropharyngeal Nodes	Lymph Node	Lymph Node	Immune System	Immune System	Unknown	Angus - Hereford	Angus Cross	Illumina HiSeq 2500	Unknown	2015-04-08	Angus Cross	Male	Male	Stage5
SAMN04091579	PRJNA272725	Bos taurus	Retropharyngeal Nodes	Lymph Node	Lymph Node	Immune System	Immune System	Unknown	Angus - Hereford	Angus Cross	Illumina HiSeq 2500	Unknown	2015-04-08	Angus Cross	Male	Male	Unknown
SAMN04091580	PRJNA272725	Bos taurus	Retropharyngeal Nodes	Lymph Node	Lymph Node	Immune System	Immune System	Unknown	Angus - Hereford	Angus Cross	Illumina HiSeq 2500	Unknown	2015-04-08	Angus Cross	Male	Male	Stage3
SAMN04091581	PRJNA272725	Bos taurus	Retropharyngeal Nodes	Lymph Node	Lymph Node	Immune System	Immune System	Unknown	Angus - Hereford	Angus Cross	Illumina HiSeq 2500	Unknown	2015-04-08	Angus Cross	Male	Male	Unknown
SAMN04091582	PRJNA272725	Bos taurus	Retropharyngeal Nodes	Lymph Node	Lymph Node	Immune System	Immune System	Unknown	Angus - Hereford	Angus Cross	Illumina HiSeq 2500	Unknown	2015-04-08	Angus Cross	Male	Male	Stage2
SAMN04091583	PRJNA272725	Bos taurus	Retropharyngeal Nodes	Lymph Node	Lymph Node	Immune System	Immune System	Unknown	Angus - Hereford	Angus Cross	Illumina HiSeq 2500	Unknown	2015-04-08	Angus Cross	Male	Male	Unknown
SAMN04091584	PRJNA272725	Bos taurus	Retropharyngeal Nodes	Lymph Node	Lymph Node	Immune System	Immune System	Unknown	Angus - Hereford	Angus Cross	Illumina HiSeq 2500	Unknown	2015-04-08	Angus Cross	Male	Male	Stage3
SAMN04091585	PRJNA272725	Bos taurus	Retropharyngeal Nodes	Lymph Node	Lymph Node	Immune System	Immune System	Unknown	Angus - Hereford	Angus Cross	Illumina HiSeq 2500	Unknown	2015-04-08	Angus Cross	Male	Male	Unknown
SAMN04091586	PRJNA272725	Bos taurus	Retropharyngeal Nodes	Lymph Node	Lymph Node	Immune System	Immune System	Unknown	Angus - Hereford	Angus Cross	Illumina HiSeq 2500	Unknown	2015-04-08	Angus Cross	Male	Male	Stage2
SAMN04091587	PRJNA272725	Bos taurus	Retropharyngeal Nodes	Lymph Node	Lymph Node	Immune System	Immune System	Unknown	Angus - Hereford	Angus Cross	Illumina HiSeq 2500	Unknown	2015-04-08	Angus Cross	Male	Male	Unknown
SAMN04091588	PRJNA272725	Bos taurus	Retropharyngeal Nodes	Lymph Node	Lymph Node	Immune System	Immune System	Unknown	Angus - Hereford	Angus Cross	Illumina HiSeq 2500	Unknown	2015-04-08	Angus Cross	Male	Male	Unknown
SAMN04091589	PRJNA272725	Bos taurus	Retropharyngeal Nodes	Lymph Node	Lymph Node	Immune System	Immune System	Unknown	Angus - Hereford	Angus Cross	Illumina HiSeq 2500	Unknown	2015-04-08	Angus Cross	Male	Male	Stage3
SAMN04091590	PRJNA272725	Bos taurus	Retropharyngeal Nodes	Lymph Node	Lymph Node	Immune System	Immune System	Unknown	Angus - Hereford	Angus Cross	Illumina HiSeq 2500	Unknown	2015-04-08	Angus Cross	Male	Male	Unknown
SAMN04091591	PRJNA272725	Bos taurus	Retropharyngeal Nodes	Lymph Node	Lymph Node	Immune System	Immune System	Unknown	Angus - Hereford	Angus Cross	Illumina HiSeq 2500	Unknown	2015-04-08	Angus Cross	Male	Male	Stage3
SAMN04194266	PRJNA299183	Bos taurus	Chorion	Placenta	Placenta	Female Reproductive System	Female Reproductive System	Unknown	Unknown	Unknown	Illumina HiSeq 2000	Embryo	2016-11-28	Holstein	Male	Male	Stage1
SAMN04194270	PRJNA299183	Bos taurus	Chorion	Placenta	Placenta	Female Reproductive System	Female Reproductive System	Unknown	Unknown	Unknown	Illumina HiSeq 2000	Embryo	2016-11-28	Holstein	Female	Male	Stage1
SAMN04194272	PRJNA299183	Bos taurus	SCNT Chorion	Placenta	Placenta	Female Reproductive System	Female Reproductive System	Unknown	Unknown	Unknown	Illumina HiSeq 2000	Embryo	2016-11-28	Holstein	Female	Male	Stage1
SAMN04194279	PRJNA299183	Bos taurus	Allantois	Placenta	Placenta	Female Reproductive System	Female Reproductive System	Unknown	Unknown	Unknown	Illumina HiSeq 2000	Embryo	2016-11-28	Holstein	Male	Male	Stage1
SAMN04194280	PRJNA299183	Bos taurus	Allantois	Placenta	Placenta	Female Reproductive System	Female Reproductive System	Unknown	Unknown	Unknown	Illumina HiSeq 2000	Embryo	2016-11-28	Holstein	Male	Male	Stage1
SAMN04194287	PRJNA299183	Bos taurus	Inter-Caruncle	Uterus	Uterus	Female Reproductive System	Female Reproductive System	Female	Unknown	Unknown	Illumina HiSeq 2000	Embryo	2016-11-28	Holstein	Female	Female	Stage1
SAMN04194289	PRJNA299183	Bos taurus	Inter-Caruncle	Uterus	Uterus	Female Reproductive System	Female Reproductive System	Female	Unknown	Unknown	Illumina HiSeq 2000	Embryo	2016-11-28	Holstein	Female	Female	Stage1
SAMN04194290	PRJNA299183	Bos taurus	Allantois	Placenta	Placenta	Female Reproductive System	Female Reproductive System	Unknown	Unknown	Unknown	Illumina HiSeq 2000	Embryo	2016-11-28	Holstein	Male	Male	Stage1
SAMN04194292	PRJNA299183	Bos taurus	Inter-Caruncle	Uterus	Uterus	Female Reproductive System	Female Reproductive System	Female	Unknown	Unknown	Illumina HiSeq 2000	Embryo	2016-11-28	Holstein	Female	Female	Stage1
SAMN04194294	PRJNA299183	Bos taurus	Inter-Caruncle	Uterus	Uterus	Female Reproductive System	Female Reproductive System	Female	Unknown	Unknown	Illumina HiSeq 2000	Embryo	2016-11-28	Holstein	Female	Female	Stage1
SAMN04194297	PRJNA299183	Bos taurus	Caruncle	Uterus	Uterus	Female Reproductive System	Female Reproductive System	Female	Unknown	Unknown	Illumina HiSeq 2000	Embryo	2016-11-28	Holstein	Female	Female	Stage1
SAMN04194303	PRJNA299183	Bos taurus	SCNT Inter-Caruncle	Uterus	Uterus	Female Reproductive System	Female Reproductive System	Unknown	Unknown	Unknown	Illumina HiSeq 2000	Embryo	2016-11-28	Holstein	Female	Female	Stage1
SAMN04194306	PRJNA299183	Bos taurus	SCNT Caruncle	Uterus	Uterus	Female Reproductive System	Female Reproductive System	Unknown	Unknown	Unknown	Illumina HiSeq 2000	Embryo	2016-11-28	Holstein	Female	Female	Stage1
SAMN04194312	PRJNA299183	Bos taurus	SCNT Caruncle	Uterus	Uterus	Female Reproductive System	Female Reproductive System	Unknown	Unknown	Unknown	Illumina HiSeq 2000	Embryo	2016-11-28	Holstein	Female	Female	Stage1
SAMN04194321	PRJNA299183	Bos taurus	SCNT Inter-Caruncle	Uterus	Uterus	Female Reproductive System	Female Reproductive System	Unknown	Unknown	Unknown	Illumina HiSeq 2000	Embryo	2016-11-28	Holstein	Female	Female	Stage1
SAMN04194328	PRJNA299183	Bos taurus	SCNT Inter-Caruncle	Uterus	Uterus	Female Reproductive System	Female Reproductive System	Unknown	Unknown	Unknown	Illumina HiSeq 2000	Embryo	2016-11-28	Holstein	Female	Female	Stage1
SAMN04194381	PRJNA299183	Bos taurus	SCNT Inter-Caruncle	Uterus	Uterus	Female Reproductive System	Female Reproductive System	Unknown	Unknown	Unknown	Illumina HiSeq 2000	Embryo	2016-11-28	Holstein	Female	Female	Stage1
SAMN04194382	PRJNA299183	Bos taurus	SCNT Caruncle	Uterus	Uterus	Female Reproductive System	Female Reproductive System	Unknown	Unknown	Unknown	Illumina HiSeq 2000	Embryo	2016-11-28	Holstein	Female	Female	Stage1
SAMN04194384	PRJNA299183	Bos taurus	SCNT Caruncle	Uterus	Uterus	Female Reproductive System	Female Reproductive System	Unknown	Unknown	Unknown	Illumina HiSeq 2000	Embryo	2016-11-28	Holstein	Female	Female	Stage1
SAMN04194386	PRJNA299183	Bos taurus	SCNT Caruncle	Uterus	Uterus	Female Reproductive System	Female Reproductive System	Unknown	Unknown	Unknown	Illumina HiSeq 2000	Embryo	2016-11-28	Holstein	Female	Female	Stage1
SAMN04194389	PRJNA299183	Bos taurus	SCNT Inter-Caruncle	Uterus	Uterus	Female Reproductive System	Female Reproductive System	Unknown	Unknown	Unknown	Illumina HiSeq 2000	Embryo	2016-11-28	Holstein	Female	Female	Stage1
SAMN04194391	PRJNA299183	Bos taurus	SCNT Inter-Caruncle	Uterus	Uterus	Female Reproductive System	Female Reproductive System	Unknown	Unknown	Unknown	Illumina HiSeq 2000	Embryo	2016-11-28	Holstein	Female	Female	Stage1
SAMN04194393	PRJNA299183	Bos taurus	SCNT Inter-Caruncle	Uterus	Uterus	Female Reproductive System	Female Reproductive System	Unknown	Unknown	Unknown	Illumina HiSeq 2000	Embryo	2016-11-28	Holstein	Female	Female	Stage1
SAMN04194395	PRJNA299183	Bos taurus	SCNT Inter-Caruncle	Uterus	Uterus	Female Reproductive System	Female Reproductive System	Unknown	Unknown	Unknown	Illumina HiSeq 2000	Embryo	2016-11-28	Holstein	Female	Female	Stage1
SAMN04194396	PRJNA299183	Bos taurus	SCNT Caruncle	Uterus	Uterus	Female Reproductive System	Female Reproductive System	Unknown	Unknown	Unknown	Illumina HiSeq 2000	Embryo	2016-11-28	Holstein	Female	Female	Stage1
SAMN04194398	PRJNA299183	Bos taurus	Caruncle	Uterus	Uterus	Female Reproductive System	Female Reproductive System	Female	Unknown	Unknown	Illumina HiSeq 2000	Embryo	2016-11-28	Holstein	Female	Female	Stage1
SAMN04194401	PRJNA299183	Bos taurus	Inter-Caruncle	Uterus	Uterus	Female Reproductive System	Female Reproductive System	Female	Unknown	Unknown	Illumina HiSeq 2000	Embryo	2016-11-28	Holstein	Female	Female	Stage1
SAMN04194403	PRJNA299183	Bos taurus	Inter-Caruncle	Uterus	Uterus	Female Reproductive System	Female Reproductive System	Female	Unknown	Unknown	Illumina HiSeq 2000	Embryo	2016-11-28	Holstein	Female	Female	Stage1
SAMN04194404	PRJNA299183	Bos taurus	Caruncle	Uterus	Uterus	Female Reproductive System	Female Reproductive System	Female	Unknown	Unknown	Illumina HiSeq 2000	Embryo	2016-11-28	Holstein	Female	Female	Stage1
SAMN04194406	PRJNA299183	Bos taurus	Caruncle	Uterus	Uterus	Female Reproductive System	Female Reproductive System	Female	Unknown	Unknown	Illumina HiSeq 2000	Embryo	2016-11-28	Holstein	Female	Female	Stage1
SAMN04194448	PRJNA299183	Bos taurus	SCNT Inter-Caruncle	Uterus	Uterus	Female Reproductive System	Female Reproductive System	Unknown	Unknown	Unknown	Illumina HiSeq 2000	Embryo	2016-11-28	Holstein	Female	Female	Stage1
SAMN04194449	PRJNA299183	Bos taurus	SCNT Caruncle	Uterus	Uterus	Female Reproductive System	Female Reproductive System	Unknown	Unknown	Unknown	Illumina HiSeq 2000	Embryo	2016-11-28	Holstein	Female	Female	Stage1
SAMN04211796	PRJNA299685	Bos taurus	Ileum	Ileum	Ileum	Digestive System	Digestive System	Unknown	Unknown	Unknown	Illumina HiSeq 2000	Unknown	2016-05-02	Holstein	Male	Male	Stage2
SAMN04211797	PRJNA299685	Bos taurus	Ileum	Ileum	Ileum	Digestive System	Digestive System	Unknown	Unknown	Unknown	Illumina HiSeq 2000	Unknown	2016-05-02	Holstein	Male	Male	Stage2
SAMN04211798	PRJNA299685	Bos taurus	Ileum	Ileum	Ileum	Digestive System	Digestive System	Unknown	Unknown	Unknown	Illumina HiSeq 2000	Unknown	2016-05-02	Holstein	Male	Male	Stage2
SAMN04211799	PRJNA299685	Bos taurus	Ileum	Ileum	Ileum	Digestive System	Digestive System	Unknown	Unknown	Unknown	Illumina HiSeq 2000	Unknown	2016-05-02	Holstein	Male	Male	Stage2
SAMN04211800	PRJNA299685	Bos taurus	Ileum	Ileum	Ileum	Digestive System	Digestive System	Unknown	Unknown	Unknown	Illumina HiSeq 2000	Unknown	2016-05-02	Holstein	Male	Male	Stage2
SAMN04211801	PRJNA299685	Bos taurus	Ileum	Ileum	Ileum	Digestive System	Digestive System	Unknown	Unknown	Unknown	Illumina HiSeq 2000	Unknown	2016-05-02	Holstein	Male	Male	Stage2
SAMN04211802	PRJNA299685	Bos taurus	Ileum	Ileum	Ileum	Digestive System	Digestive System	Unknown	Unknown	Unknown	Illumina HiSeq 2000	Unknown	2016-05-02	Holstein	Male	Male	Stage2
SAMN04211804	PRJNA299685	Bos taurus	Ileum	Ileum	Ileum	Digestive System	Digestive System	Unknown	Unknown	Unknown	Illumina HiSeq 2000	Unknown	2016-05-02	Holstein	Male	Male	Stage2
SAMN04211805	PRJNA299685	Bos taurus	Ileum	Ileum	Ileum	Digestive System	Digestive System	Unknown	Unknown	Unknown	Illumina HiSeq 2000	Unknown	2016-05-02	Holstein	Male	Male	Stage2
SAMN04211806	PRJNA299685	Bos taurus	Ileum	Ileum	Ileum	Digestive System	Digestive System	Unknown	Unknown	Unknown	Illumina HiSeq 2000	Unknown	2016-05-02	Holstein	Male	Male	Stage2
SAMN04211807	PRJNA299685	Bos taurus	Rumen	Rumen	Rumen	Digestive System	Digestive System	Unknown	Unknown	Unknown	Illumina HiSeq 2000	Unknown	2016-05-02	Holstein	Male	Male	Unknown
SAMN04211825	PRJNA299685	Bos taurus	Mid-Jejunum	Jejunum	Jejunum	Digestive System	Digestive System	Unknown	Unknown	Unknown	Illumina HiSeq 2000	Unknown	2016-05-02	Holstein	Male	Male	Unknown
SAMN04211826	PRJNA299685	Bos taurus	Mid-Jejunum	Jejunum	Jejunum	Digestive System	Digestive System	Unknown	Unknown	Unknown	Illumina HiSeq 2000	Unknown	2016-05-02	Holstein	Male	Male	Unknown
SAMN04211831	PRJNA299685	Bos taurus	Mid-Jejunum	Jejunum	Jejunum	Digestive System	Digestive System	Unknown	Unknown	Unknown	Illumina HiSeq 2000	Unknown	2016-05-02	Holstein	Male	Male	Stage4
SAMN04211836	PRJNA299685	Bos taurus	Mid-Jejunum	Jejunum	Jejunum	Digestive System	Digestive System	Unknown	Unknown	Unknown	Illumina HiSeq 2000	Unknown	2016-05-02	Holstein	Male	Male	Unknown
SAMN04211840	PRJNA299685	Bos taurus	Mid-Jejunum	Jejunum	Jejunum	Digestive System	Digestive System	Unknown	Unknown	Unknown	Illumina HiSeq 2000	Unknown	2016-05-02	Holstein	Male	Male	Unknown
SAMN04211841	PRJNA299685	Bos taurus	Mid-Jejunum	Jejunum	Jejunum	Digestive System	Digestive System	Unknown	Unknown	Unknown	Illumina HiSeq 2000	Unknown	2016-05-02	Holstein	Male	Male	Unknown
SAMN04211842	PRJNA299685	Bos taurus	Mid-Jejunum	Jejunum	Jejunum	Digestive System	Digestive System	Unknown	Unknown	Unknown	Illumina HiSeq 2000	Unknown	2016-05-02	Holstein	Male	Male	Unknown
SAMN04211845	PRJNA299685	Bos taurus	Distal Jejunum	Jejunum	Jejunum	Digestive System	Digestive System	Unknown	Unknown	Unknown	Illumina HiSeq 2000	Unknown	2016-05-02	Holstein	Male	Male	Unknown
SAMN04211846	PRJNA299685	Bos taurus	Distal Jejunum	Jejunum	Jejunum	Digestive System	Digestive System	Unknown	Unknown	Unknown	Illumina HiSeq 2000	Unknown	2016-05-02	Holstein	Male	Male	Stage2
SAMN04211847	PRJNA299685	Bos taurus	Distal Jejunum	Jejunum	Jejunum	Digestive System	Digestive System	Unknown	Unknown	Unknown	Illumina HiSeq 2000	Unknown	2016-05-02	Holstein	Male	Male	Stage2
SAMN04211848	PRJNA299685	Bos taurus	Distal Jejunum	Jejunum	Jejunum	Digestive System	Digestive System	Unknown	Unknown	Unknown	Illumina HiSeq 2000	Unknown	2016-05-02	Holstein	Male	Male	Stage2
SAMN04211850	PRJNA299685	Bos taurus	Distal Jejunum	Jejunum	Jejunum	Digestive System	Digestive System	Unknown	Unknown	Unknown	Illumina HiSeq 2000	Unknown	2016-05-02	Holstein	Male	Male	Stage2
SAMN04211851	PRJNA299685	Bos taurus	Distal Jejunum	Jejunum	Jejunum	Digestive System	Digestive System	Unknown	Unknown	Unknown	Illumina HiSeq 2000	Unknown	2016-05-02	Holstein	Male	Male	Stage2
SAMN04211852	PRJNA299685	Bos taurus	Distal Jejunum	Jejunum	Jejunum	Digestive System	Digestive System	Unknown	Unknown	Unknown	Illumina HiSeq 2000	Unknown	2016-05-02	Holstein	Male	Male	Stage2
SAMN04211853	PRJNA299685	Bos taurus	Distal Jejunum	Jejunum	Jejunum	Digestive System	Digestive System	Unknown	Unknown	Unknown	Illumina HiSeq 2000	Unknown	2016-05-02	Holstein	Male	Male	Stage2
SAMN04211855	PRJNA299685	Bos taurus	Distal Jejunum	Jejunum	Jejunum	Digestive System	Digestive System	Unknown	Unknown	Unknown	Illumina HiSeq 2000	Unknown	2016-05-02	Holstein	Male	Male	Stage2
SAMN04211856	PRJNA299685	Bos taurus	Distal Jejunum	Jejunum	Jejunum	Digestive System	Digestive System	Unknown	Unknown	Unknown	Illumina HiSeq 2000	Unknown	2016-05-02	Holstein	Male	Male	Stage2
SAMN04211859	PRJNA299685	Bos taurus	Distal Jejunum	Jejunum	Jejunum	Digestive System	Digestive System	Unknown	Unknown	Unknown	Illumina HiSeq 2000	Unknown	2016-05-02	Holstein	Male	Male	Stage2
SAMN04211860	PRJNA299685	Bos taurus	Ileum	Ileum	Ileum	Digestive System	Digestive System	Unknown	Unknown	Unknown	Illumina HiSeq 2000	Unknown	2016-05-02	Holstein	Male	Male	Unknown
SAMN04211862	PRJNA299685	Bos taurus	Ileum	Ileum	Ileum	Digestive System	Digestive System	Unknown	Unknown	Unknown	Illumina HiSeq 2000	Unknown	2016-05-02	Holstein	Male	Male	Stage2
SAMN04211864	PRJNA299685	Bos taurus	Ileum	Ileum	Ileum	Digestive System	Digestive System	Unknown	Unknown	Unknown	Illumina HiSeq 2000	Unknown	2016-05-02	Holstein	Male	Male	Stage2
SAMN04211865	PRJNA299685	Bos taurus	Ileum	Ileum	Ileum	Digestive System	Digestive System	Unknown	Unknown	Unknown	Illumina HiSeq 2000	Unknown	2016-05-02	Holstein	Male	Male	Stage2
SAMN04217717	PRJNA300273	Bos taurus	Non-Infected Ileal Tissues	Ileum	Ileum	Digestive System	Digestive System	Unknown	Unknown	Unknown	Illumina HiSeq 2000	Unknown	2016-05-02	Holstein	Male	Male	Stage2
SAMN04217719	PRJNA300273	Bos taurus	Non-Infected Ileal Tissues	Ileum	Ileum	Digestive System	Digestive System	Unknown	Unknown	Unknown	Illumina HiSeq 2000	Unknown	2016-05-02	Holstein	Male	Male	Stage2
SAMN04217720	PRJNA300273	Bos taurus	Non-Infected Ileal Tissues	Ileum	Ileum	Digestive System	Digestive System	Unknown	Unknown	Unknown	Illumina HiSeq 2000	Unknown	2016-05-02	Holstein	Male	Male	Stage2
SAMN04217731	PRJNA300273	Bos taurus	Map-Infected Ileal Tissue	Ileum	Ileum	Digestive System	Digestive System	Unknown	Unknown	Unknown	Illumina HiSeq 2000	Unknown	2016-05-02	Holstein	Male	Male	Stage2
SAMN04217733	PRJNA300273	Bos taurus	Map-Infected Ileal Tissue	Ileum	Ileum	Digestive System	Digestive System	Unknown	Unknown	Unknown	Illumina HiSeq 2000	Unknown	2016-05-02	Holstein	Male	Male	Stage2
SAMN04219203	PRJNA300588	Bos taurus	Mammary	Mammary Gland	Mammary Gland	Mammary Gland	Mammary Gland	Female	Holstein	Holstein	Illumina HiSeq 2000	Unknown	2015-11-25	Holstein	Female	Female	Stage5
SAMN04226137	PRJNA300570	Bos taurus	Ileal Tissue	Ileum	Ileum	Digestive System	Digestive System	Unknown	Unknown	Unknown	Illumina HiSeq 2000	Unknown	2016-11-01	Holstein	Male	Male	Stage2
SAMN04226138	PRJNA300570	Bos taurus	Ileal Tissue	Ileum	Ileum	Digestive System	Digestive System	Unknown	Unknown	Unknown	Illumina HiSeq 2000	Unknown	2016-11-01	Holstein	Male	Male	Stage2
SAMN04226150	PRJNA300570	Bos taurus	Ileal Tissue	Ileum	Ileum	Digestive System	Digestive System	Unknown	Unknown	Unknown	Illumina HiSeq 2000	Unknown	2016-11-01	Holstein	Male	Male	Stage2
SAMN04226152	PRJNA300570	Bos taurus	Ileal Tissue	Ileum	Ileum	Digestive System	Digestive System	Unknown	Unknown	Unknown	Illumina HiSeq 2000	Unknown	2016-11-01	Holstein	Male	Male	Stage2
SAMN04226160	PRJNA300570	Bos taurus	Ileal Tissue	Ileum	Ileum	Digestive System	Digestive System	Unknown	Unknown	Unknown	Illumina HiSeq 2000	Unknown	2016-11-01	Holstein	Male	Male	Stage2
SAMN04226178	PRJNA300570	Bos taurus	Ileal Tissue	Ileum	Ileum	Digestive System	Digestive System	Unknown	Unknown	Unknown	Illumina HiSeq 2000	Unknown	2016-11-01	Holstein	Male	Male	Stage2
SAMN04226181	PRJNA300570	Bos taurus	Ileal Tissue	Ileum	Ileum	Digestive System	Digestive System	Unknown	Unknown	Unknown	Illumina HiSeq 2000	Unknown	2016-11-01	Holstein	Male	Male	Stage2
SAMN04226186	PRJNA300570	Bos taurus	Ileal Tissue	Ileum	Ileum	Digestive System	Digestive System	Unknown	Unknown	Unknown	Illumina HiSeq 2000	Unknown	2016-11-01	Holstein	Male	Male	Stage2
SAMN04226191	PRJNA300570	Bos taurus	Ileal Tissue	Ileum	Ileum	Digestive System	Digestive System	Unknown	Unknown	Unknown	Illumina HiSeq 2000	Unknown	2016-11-01	Holstein	Male	Male	Stage2
SAMN04231304	PRJNA300963	Bos taurus	Oviduct	Oviduct	Oviduct	Female Reproductive System	Female Reproductive System	Female	Unknown	Unknown	Illumina HiSeq 2500	Unknown	2015-11-05	Holstein	Female	Female	Unknown
SAMN04231305	PRJNA300963	Bos taurus	Oviduct	Oviduct	Oviduct	Female Reproductive System	Female Reproductive System	Female	Unknown	Unknown	Illumina HiSeq 2500	Unknown	2015-11-05	Charolais	Female	Female	Unknown
SAMN04231306	PRJNA300963	Bos taurus	Oviduct	Oviduct	Oviduct	Female Reproductive System	Female Reproductive System	Female	Unknown	Unknown	Illumina HiSeq 2500	Unknown	2015-11-05	Charolais	Female	Female	Stage5
SAMN04231307	PRJNA300963	Bos taurus	Oviduct	Oviduct	Oviduct	Female Reproductive System	Female Reproductive System	Female	Unknown	Unknown	Illumina HiSeq 2500	Unknown	2015-11-05	Charolais	Female	Female	Stage5
SAMN04231320	PRJNA300963	Bos taurus	Oviduct	Oviduct	Oviduct	Female Reproductive System	Female Reproductive System	Female	Unknown	Unknown	Illumina HiSeq 2500	Unknown	2015-11-05	Limousin	Female	Female	Unknown
SAMN04231321	PRJNA300963	Bos taurus	Oviduct	Oviduct	Oviduct	Female Reproductive System	Female Reproductive System	Female	Unknown	Unknown	Illumina HiSeq 2500	Unknown	2015-11-05	Charolais	Female	Female	Unknown
SAMN04231322	PRJNA300963	Bos taurus	Oviduct	Oviduct	Oviduct	Female Reproductive System	Female Reproductive System	Female	Unknown	Unknown	Illumina HiSeq 2500	Unknown	2015-11-05	Limousin	Female	Female	Stage5
SAMN04231323	PRJNA300963	Bos taurus	Oviduct	Oviduct	Oviduct	Female Reproductive System	Female Reproductive System	Female	Unknown	Unknown	Illumina HiSeq 2500	Unknown	2015-11-05	Charolais	Female	Female	Unknown
SAMN04231324	PRJNA300963	Bos taurus	Oviduct	Oviduct	Oviduct	Female Reproductive System	Female Reproductive System	Female	Unknown	Unknown	Illumina HiSeq 2500	Unknown	2015-11-05	Holstein	Female	Female	Unknown
SAMN04231325	PRJNA300963	Bos taurus	Oviduct	Oviduct	Oviduct	Female Reproductive System	Female Reproductive System	Female	Unknown	Unknown	Illumina HiSeq 2500	Unknown	2015-11-05	Charolais	Female	Female	Stage5
SAMN04259758	PRJNA301773	Bos taurus	Mammary Gland	Mammary Gland	Mammary Gland	Mammary Gland	Mammary Gland	Female	Holstein	Holstein	Illumina HiSeq 2000	Unknown	2016-11-11	Holstein	Female	Female	Stage5
SAMN04259759	PRJNA301774	Bos taurus	Mammary Gland	Mammary Gland	Mammary Gland	Mammary Gland	Mammary Gland	Female	Holstein	Holstein	Illumina HiSeq 2000	Unknown	2016-11-24	Holstein	Female	Female	Stage5
SAMN04259761	PRJNA301774	Bos taurus	Mammary Gland	Mammary Gland	Mammary Gland	Mammary Gland	Mammary Gland	Female	Holstein	Holstein	Illumina HiSeq 2000	Unknown	2016-11-24	Holstein	Female	Female	Stage5
SAMN04259764	PRJNA301774	Bos taurus	Mammary Gland	Mammary Gland	Mammary Gland	Mammary Gland	Mammary Gland	Female	Holstein	Holstein	Illumina HiSeq 2000	Unknown	2016-11-24	Holstein	Female	Female	Stage5
SAMN04259766	PRJNA301774	Bos taurus	Mammary Gland	Mammary Gland	Mammary Gland	Mammary Gland	Mammary Gland	Female	Holstein	Holstein	Illumina HiSeq 2000	Unknown	2016-11-24	Holstein	Female	Female	Stage5
SAMN04259769	PRJNA301774	Bos taurus	Mammary Gland	Mammary Gland	Mammary Gland	Mammary Gland	Mammary Gland	Female	Holstein	Holstein	Illumina HiSeq 2000	Unknown	2016-11-24	Holstein	Female	Female	Stage5
SAMN04259770	PRJNA301774	Bos taurus	Mammary Gland	Mammary Gland	Mammary Gland	Mammary Gland	Mammary Gland	Female	Holstein	Holstein	Illumina HiSeq 2000	Unknown	2016-11-24	Holstein	Female	Female	Stage5
SAMN04259774	PRJNA301774	Bos taurus	Mammary Gland	Mammary Gland	Mammary Gland	Mammary Gland	Mammary Gland	Female	Holstein	Holstein	Illumina HiSeq 2000	Unknown	2016-11-24	Holstein	Female	Female	Stage5
SAMN04259776	PRJNA301774	Bos taurus	Mammary Gland	Mammary Gland	Mammary Gland	Mammary Gland	Mammary Gland	Female	Holstein	Holstein	Illumina HiSeq 2000	Unknown	2016-11-24	Holstein	Female	Female	Stage5
SAMN04259779	PRJNA301774	Bos taurus	Mammary Gland	Mammary Gland	Mammary Gland	Mammary Gland	Mammary Gland	Female	Holstein	Holstein	Illumina HiSeq 2000	Unknown	2016-11-24	Holstein	Female	Female	Stage5
SAMN04259784	PRJNA301774	Bos taurus	Mammary Gland	Mammary Gland	Mammary Gland	Mammary Gland	Mammary Gland	Female	Holstein	Holstein	Illumina HiSeq 2000	Unknown	2016-11-24	Holstein	Female	Female	Stage5
SAMN04259786	PRJNA301774	Bos taurus	Mammary Gland	Mammary Gland	Mammary Gland	Mammary Gland	Mammary Gland	Female	Holstein	Holstein	Illumina HiSeq 2000	Unknown	2016-11-24	Holstein	Female	Female	Stage5
SAMN04259788	PRJNA301774	Bos taurus	Mammary Gland	Mammary Gland	Mammary Gland	Mammary Gland	Mammary Gland	Female	Holstein	Holstein	Illumina HiSeq 2000	Unknown	2016-11-24	Holstein	Female	Female	Stage5
SAMN04259791	PRJNA301774	Bos taurus	Mammary Gland	Mammary Gland	Mammary Gland	Mammary Gland	Mammary Gland	Female	Holstein	Holstein	Illumina HiSeq 2000	Unknown	2016-11-24	Holstein	Female	Female	Stage5
SAMN04286644	PRJNA303131	Bos taurus	Liver	Liver	Liver	Liver	Liver	Female	Holstein	Holstein	Illumina HiSeq 2000	Unknown	2015-11-24	Holstein	Female	Female	Stage5
SAMN04286646	PRJNA303131	Bos taurus	Liver	Liver	Liver	Liver	Liver	Female	Holstein	Holstein	Illumina HiSeq 2000	Unknown	2015-11-24	Holstein	Female	Female	Stage5
SAMN04286649	PRJNA303131	Bos taurus	Liver	Liver	Liver	Liver	Liver	Female	Holstein	Holstein	Illumina HiSeq 2000	Unknown	2015-11-24	Holstein	Female	Female	Stage5
SAMN04286652	PRJNA303131	Bos taurus	Liver	Liver	Liver	Liver	Liver	Female	Holstein	Holstein	Illumina HiSeq 2000	Unknown	2015-11-24	Holstein	Female	Female	Stage5
SAMN04286657	PRJNA303131	Bos taurus	Liver	Liver	Liver	Liver	Liver	Female	Holstein	Holstein	Illumina HiSeq 2000	Unknown	2015-11-24	Holstein	Female	Female	Stage5
SAMN04286658	PRJNA303131	Bos taurus	Liver	Liver	Liver	Liver	Liver	Female	Holstein	Holstein	Illumina HiSeq 2000	Unknown	2015-11-24	Holstein	Female	Female	Stage5
SAMN04286924	PRJNA303144	Bos taurus	Liver	Liver	Liver	Liver	Liver	Male	Belgian Blue X Holstein	Holstein Cross	Illumina HiSeq 2500	Adult	2016-11-23	Holstein Cross	Male	Male	Stage5
SAMN04286925	PRJNA303144	Bos taurus	Liver	Liver	Liver	Liver	Liver	Male	Belgian Blue X Holstein	Holstein Cross	Illumina HiSeq 2500	Adult	2016-11-23	Holstein Cross	Male	Male	Unknown
SAMN04286926	PRJNA303144	Bos taurus	Liver	Liver	Liver	Liver	Liver	Male	Belgian Blue X Holstein	Holstein Cross	Illumina HiSeq 2500	Adult	2016-11-23	Holstein Cross	Male	Male	Stage5
SAMN04286927	PRJNA303144	Bos taurus	Liver	Liver	Liver	Liver	Liver	Male	Belgian Blue X Holstein	Holstein Cross	Illumina HiSeq 2500	Adult	2016-11-23	Holstein Cross	Male	Male	Stage5
SAMN04286928	PRJNA303144	Bos taurus	Liver	Liver	Liver	Liver	Liver	Male	Belgian Blue X Holstein	Holstein Cross	Illumina HiSeq 2500	Adult	2016-11-23	Holstein Cross	Male	Male	Stage5
SAMN04286930	PRJNA303144	Bos taurus	Liver	Liver	Liver	Liver	Liver	Male	Belgian Blue X Holstein	Holstein Cross	Illumina HiSeq 2500	Adult	2016-11-23	Holstein Cross	Male	Male	Stage5
SAMN04286931	PRJNA303144	Bos taurus	Liver	Liver	Liver	Liver	Liver	Male	Belgian Blue X Holstein	Holstein Cross	Illumina HiSeq 2500	Adult	2016-11-23	Holstein Cross	Male	Male	Stage5
SAMN04286932	PRJNA303144	Bos taurus	Liver	Liver	Liver	Liver	Liver	Male	Belgian Blue X Holstein	Holstein Cross	Illumina HiSeq 2500	Adult	2016-11-23	Holstein Cross	Male	Male	Stage5
SAMN04286933	PRJNA303144	Bos taurus	Liver	Liver	Liver	Liver	Liver	Male	Belgian Blue X Holstein	Holstein Cross	Illumina HiSeq 2500	Adult	2016-11-23	Holstein Cross	Male	Male	Stage5
SAMN04286934	PRJNA303144	Bos taurus	Liver	Liver	Liver	Liver	Liver	Male	Belgian Blue X Holstein	Holstein Cross	Illumina HiSeq 2500	Adult	2016-11-23	Holstein Cross	Male	Male	Stage5
SAMN04288044	PRJNA303272	Bos grunniens	Ruminal Epithelium	Rumen	Rumen	Digestive System	Digestive System	Unknown		Yak	Illumina HiSeq 2000	adult(>4 years old)	2017-01-19	Yak	Unknown	Male	Unknown
SAMN04293507	PRJNA304027	Bos taurus	Mammary	Mammary Gland	Mammary Gland	Mammary Gland	Mammary Gland	Unknown	Unknown	Unknown	Illumina HiSeq 2000	Unknown	2016-07-01	Holstein	Female	Female	Stage5
SAMN04293510	PRJNA304027	Bos taurus	Mammary	Mammary Gland	Mammary Gland	Mammary Gland	Mammary Gland	Unknown	Unknown	Unknown	Illumina HiSeq 2000	Unknown	2016-07-01	Holstein	Female	Female	Stage5
SAMN04293514	PRJNA304027	Bos taurus	Mammary	Mammary Gland	Mammary Gland	Mammary Gland	Mammary Gland	Unknown	Unknown	Unknown	Illumina HiSeq 2000	Unknown	2016-07-01	Holstein	Female	Female	Stage5
SAMN04293517	PRJNA304027	Bos taurus	Mammary	Mammary Gland	Mammary Gland	Mammary Gland	Mammary Gland	Unknown	Unknown	Unknown	Illumina HiSeq 2000	Unknown	2016-07-01	Holstein	Female	Female	Stage5
SAMN04293520	PRJNA304027	Bos taurus	Mammary	Mammary Gland	Mammary Gland	Mammary Gland	Mammary Gland	Unknown	Unknown	Unknown	Illumina HiSeq 2000	Unknown	2016-07-01	Holstein	Female	Female	Stage5
SAMN04293524	PRJNA304027	Bos taurus	Liver	Liver	Liver	Liver	Liver	Unknown	Unknown	Unknown	Illumina HiSeq 2000	Unknown	2016-07-01	Holstein	Female	Female	Stage5
SAMN04293527	PRJNA304027	Bos taurus	Liver	Liver	Liver	Liver	Liver	Unknown	Unknown	Unknown	Illumina HiSeq 2000	Unknown	2016-07-01	Holstein	Female	Female	Unknown
SAMN04293530	PRJNA304027	Bos taurus	Liver	Liver	Liver	Liver	Liver	Unknown	Unknown	Unknown	Illumina HiSeq 2000	Unknown	2016-07-01	Holstein	Female	Female	Stage5
SAMN04293534	PRJNA304027	Bos taurus	Liver	Liver	Liver	Liver	Liver	Unknown	Unknown	Unknown	Illumina HiSeq 2000	Unknown	2016-07-01	Holstein	Female	Female	Stage5
SAMN04293535	PRJNA304027	Bos taurus	Liver	Liver	Liver	Liver	Liver	Unknown	Unknown	Unknown	Illumina HiSeq 2000	Unknown	2016-07-01	Holstein	Female	Female	Stage5
SAMN04293540	PRJNA304027	Bos taurus	Liver	Liver	Liver	Liver	Liver	Unknown	Unknown	Unknown	Illumina HiSeq 2000	Unknown	2016-07-01	Holstein	Female	Female	Stage5
SAMN04293542	PRJNA304027	Bos taurus	Mammary	Mammary Gland	Mammary Gland	Mammary Gland	Mammary Gland	Unknown	Unknown	Unknown	Illumina HiSeq 2000	Unknown	2016-07-01	Holstein	Female	Female	Stage5
SAMN04377973	PRJNA307232	Bos grunniens	Heart	Heart	Liver	Cardiovascular System	Liver	Unknown		Yak	Illumina HiSeq 2000	adult(>4 years old)	2017-01-19	Yak	Unknown	Male	Stage5
SAMN04383539	PRJNA307579	Bos taurus	Rumen Epithelium	Rumen	Rumen	Digestive System	Digestive System	Unknown	Unknown	Unknown	Illumina HiSeq 2000	Unknown	2017-01-03	Kinsella Composite	Male	Male	Stage5
SAMN04383540	PRJNA307579	Bos taurus	Rumen Epithelium	Rumen	Rumen	Digestive System	Digestive System	Unknown	Unknown	Unknown	Illumina HiSeq 2000	Unknown	2017-01-03	Angus	Male	Male	Stage5
SAMN04383541	PRJNA307579	Bos taurus	Rumen Epithelium	Rumen	Rumen	Digestive System	Digestive System	Unknown	Unknown	Unknown	Illumina HiSeq 2000	Unknown	2017-01-03	Angus	Male	Male	Unknown
SAMN04383542	PRJNA307579	Bos taurus	Rumen Epithelium	Rumen	Rumen	Digestive System	Digestive System	Unknown	Unknown	Unknown	Illumina HiSeq 2000	Unknown	2017-01-03	Kinsella Composite	Male	Male	Unknown
SAMN04383543	PRJNA307579	Bos taurus	Rumen Epithelium	Rumen	Rumen	Digestive System	Digestive System	Unknown	Unknown	Unknown	Illumina HiSeq 2000	Unknown	2017-01-03	Angus	Male	Male	Unknown
SAMN04383544	PRJNA307579	Bos taurus	Rumen Epithelium	Rumen	Rumen	Digestive System	Digestive System	Unknown	Unknown	Unknown	Illumina HiSeq 2000	Unknown	2017-01-03	Kinsella Composite	Male	Male	Stage5
SAMN04383545	PRJNA307579	Bos taurus	Rumen Epithelium	Rumen	Rumen	Digestive System	Digestive System	Unknown	Unknown	Unknown	Illumina HiSeq 2000	Unknown	2017-01-03	Angus	Male	Male	Stage5
SAMN04383546	PRJNA307579	Bos taurus	Rumen Epithelium	Rumen	Rumen	Digestive System	Digestive System	Unknown	Unknown	Unknown	Illumina HiSeq 2000	Unknown	2017-01-03	Angus	Male	Male	Unknown
SAMN04383547	PRJNA307579	Bos taurus	Rumen Epithelium	Rumen	Rumen	Digestive System	Digestive System	Unknown	Unknown	Unknown	Illumina HiSeq 2000	Unknown	2017-01-03	Holstein	Unknown	Unknown	Unknown
SAMN04383548	PRJNA307579	Bos taurus	Rumen Epithelium	Rumen	Rumen	Digestive System	Digestive System	Unknown	Unknown	Unknown	Illumina HiSeq 2000	Unknown	2017-01-03	Angus	Male	Male	Stage5
SAMN04383549	PRJNA307579	Bos taurus	Rumen Epithelium	Rumen	Rumen	Digestive System	Digestive System	Unknown	Unknown	Unknown	Illumina HiSeq 2000	Unknown	2017-01-03	Angus	Male	Male	Stage5
SAMN04383550	PRJNA307579	Bos taurus	Rumen Epithelium	Rumen	Rumen	Digestive System	Digestive System	Unknown	Unknown	Unknown	Illumina HiSeq 2000	Unknown	2017-01-03	Composite	Male	Male	Unknown
SAMN04383551	PRJNA307579	Bos taurus	Rumen Epithelium	Rumen	Rumen	Digestive System	Digestive System	Unknown	Unknown	Unknown	Illumina HiSeq 2000	Unknown	2017-01-03	Kinsella Composite	Male	Male	Unknown
SAMN04383552	PRJNA307579	Bos taurus	Rumen Epithelium	Rumen	Rumen	Digestive System	Digestive System	Unknown	Unknown	Unknown	Illumina HiSeq 2000	Unknown	2017-01-03	Angus	Male	Male	Stage5
SAMN04383553	PRJNA307579	Bos taurus	Rumen Epithelium	Rumen	Rumen	Digestive System	Digestive System	Unknown	Unknown	Unknown	Illumina HiSeq 2000	Unknown	2017-01-03	Kinsella Composite	Male	Male	Stage5
SAMN04383554	PRJNA307579	Bos taurus	Rumen Epithelium	Rumen	Rumen	Digestive System	Digestive System	Unknown	Unknown	Unknown	Illumina HiSeq 2000	Unknown	2017-01-03	Angus	Male	Male	Stage5
SAMN04383555	PRJNA307579	Bos taurus	Rumen Epithelium	Rumen	Rumen	Digestive System	Digestive System	Unknown	Unknown	Unknown	Illumina HiSeq 2000	Unknown	2017-01-03	Kinsella Composite	Male	Male	Stage5
SAMN04383556	PRJNA307579	Bos taurus	Rumen Epithelium	Rumen	Rumen	Digestive System	Digestive System	Unknown	Unknown	Unknown	Illumina HiSeq 2000	Unknown	2017-01-03	Kinsella Composite	Male	Male	Stage5
SAMN04383557	PRJNA307579	Bos taurus	Rumen Epithelium	Rumen	Rumen	Digestive System	Digestive System	Unknown	Unknown	Unknown	Illumina HiSeq 2000	Unknown	2017-01-03	Angus	Male	Male	Stage5
SAMN04383558	PRJNA307579	Bos taurus	Rumen Epithelium	Rumen	Rumen	Digestive System	Digestive System	Unknown	Unknown	Unknown	Illumina HiSeq 2000	Unknown	2017-01-03	Angus	Male	Male	Unknown
SAMN04407486	PRJNA308746	Bos taurus	Blood	Blood	Blood	Immune System	Immune System	Unknown	Holstein	Holstein	Illumina HiSeq 2500	Unknown	2016-08-22	Holstein	Male	Male	Stage2
SAMN04407489	PRJNA308746	Bos taurus	Blood	Blood	Blood	Immune System	Immune System	Unknown	Holstein	Holstein	Illumina HiSeq 2500	Unknown	2016-08-22	Holstein	Male	Male	Stage2
SAMN04407490	PRJNA308746	Bos taurus	Blood	Blood	Blood	Immune System	Immune System	Unknown	Holstein	Holstein	Illumina HiSeq 2500	Unknown	2016-08-22	Holstein	Male	Male	Stage2
SAMN04407491	PRJNA308746	Bos taurus	Blood	Blood	Blood	Immune System	Immune System	Unknown	Holstein	Holstein	Illumina HiSeq 2500	Unknown	2016-08-22	Holstein	Male	Male	Stage2
SAMN04407493	PRJNA308746	Bos taurus	Blood	Blood	Blood	Immune System	Immune System	Unknown	Jersey	Jersey	Illumina HiSeq 2500	Unknown	2016-08-22	Jersey	Male	Male	Stage2
SAMN04407494	PRJNA308746	Bos taurus	Blood	Blood	Blood	Immune System	Immune System	Unknown	Jersey	Jersey	Illumina HiSeq 2500	Unknown	2016-08-22	Jersey	Male	Male	Stage2
SAMN04407499	PRJNA308746	Bos taurus	Blood	Blood	Blood	Immune System	Immune System	Unknown	Holstein	Holstein	Illumina HiSeq 2500	Unknown	2016-08-22	Holstein	Male	Male	Stage2
SAMN04407507	PRJNA308746	Bos taurus	Blood	Blood	Blood	Immune System	Immune System	Unknown	Jersey	Jersey	Illumina HiSeq 2500	Unknown	2016-08-22	Jersey	Male	Male	Stage2
SAMN04407512	PRJNA308746	Bos taurus	Blood	Blood	Blood	Immune System	Immune System	Unknown	Holstein	Holstein	Illumina HiSeq 2500	Unknown	2016-08-22	Holstein	Male	Male	Stage2
SAMN04407513	PRJNA308746	Bos taurus	Blood	Blood	Blood	Immune System	Immune System	Unknown	Holstein	Holstein	Illumina HiSeq 2500	Unknown	2016-08-22	Holstein	Male	Male	Stage2
SAMN04407515	PRJNA308746	Bos taurus	Blood	Blood	Blood	Immune System	Immune System	Unknown	Jersey	Jersey	Illumina HiSeq 2500	Unknown	2016-08-22	Jersey	Male	Male	Stage2
SAMN04407522	PRJNA308746	Bos taurus	Blood	Blood	Blood	Immune System	Immune System	Unknown	Holstein	Holstein	Illumina HiSeq 2500	Unknown	2016-08-22	Holstein	Male	Male	Stage2
SAMN04407526	PRJNA308746	Bos taurus	Blood	Blood	Blood	Immune System	Immune System	Unknown	Jersey	Jersey	Illumina HiSeq 2500	Unknown	2016-08-22	Jersey	Male	Male	Stage2
SAMN04407530	PRJNA308746	Bos taurus	Blood	Blood	Blood	Immune System	Immune System	Unknown	Jersey	Jersey	Illumina HiSeq 2500	Unknown	2016-08-22	Jersey	Male	Male	Stage2
SAMN04407532	PRJNA308746	Bos taurus	Blood	Blood	Blood	Immune System	Immune System	Unknown	Jersey	Jersey	Illumina HiSeq 2500	Unknown	2016-08-22	Jersey	Male	Male	Stage2
SAMN04407533	PRJNA308746	Bos taurus	Blood	Blood	Blood	Immune System	Immune System	Unknown	Jersey	Jersey	Illumina HiSeq 2500	Unknown	2016-08-22	Jersey	Male	Male	Stage2
SAMN04430398	PRJNA309284	Bos taurus	Heart	Heart	Heart	Cardiovascular System	Cardiovascular System	Unknown	Chengdu	Chengdu	Illumina HiSeq 2000	4 years	2017-09-06	Chengdu	Male	Male	Stage5
SAMN04430400	PRJNA309284	Bos taurus	Heart	Heart	Heart	Cardiovascular System	Cardiovascular System	Unknown	Chengdu	Chengdu	Illumina HiSeq 2000	4 years	2017-09-06	Chengdu	Female	Female	Stage5
SAMN04430406	PRJNA309284	Bos taurus	Liver	Liver	Liver	Liver	Liver	Unknown	Chengdu	Chengdu	Illumina HiSeq 2500	4 years	2017-09-06	Chengdu	Female	Male	Stage5
SAMN04430407	PRJNA309284	Bos taurus	Liver	Liver	Liver	Liver	Liver	Unknown	Chengdu	Chengdu	Illumina HiSeq 2500	4 years	2017-09-06	Chengdu	Female	Female	Stage5
SAMN04430408	PRJNA309284	Bos taurus	Liver	Liver	Liver	Liver	Liver	Unknown	Chengdu	Chengdu	Illumina HiSeq 2500	4 years	2017-09-06	Chengdu	Female	Female	Stage5
SAMN04455344	PRJNA311009	Bos taurus	Pituitary	Pituitary	Pituitary	Nervous System	Nervous System	Male	Angus	Angus	Illumina HiSeq 2000	1.25 years	2016-02-16	Angus	Male	Male	Stage4
SAMN04455345	PRJNA311009	Bos taurus	Pituitary	Pituitary	Pituitary	Nervous System	Nervous System	Male	Angus	Angus	Illumina HiSeq 2000	1.25 years	2016-02-16	Angus	Male	Male	Stage4
SAMN04455346	PRJNA311009	Bos taurus	Pituitary	Pituitary	Pituitary	Nervous System	Nervous System	Male	Angus	Angus	Illumina HiSeq 2000	1.25 years	2016-02-16	Angus	Male	Male	Stage4
SAMN04455347	PRJNA311009	Bos taurus	Pituitary	Pituitary	Pituitary	Nervous System	Nervous System	Male	Angus	Angus	Illumina HiSeq 2000	1.25 years	2016-02-16	Angus	Male	Male	Stage4
SAMN04455348	PRJNA311009	Bos taurus	Pituitary	Pituitary	Pituitary	Nervous System	Nervous System	Male	Angus	Angus	Illumina HiSeq 2000	1.25 years	2016-02-16	Angus	Male	Male	Stage4
SAMN04455349	PRJNA311009	Bos taurus	Pituitary	Pituitary	Pituitary	Nervous System	Nervous System	Male	Angus	Angus	Illumina HiSeq 2000	1.25 years	2016-02-16	Angus	Male	Male	Stage4
SAMN04455350	PRJNA311009	Bos taurus	Pituitary	Pituitary	Pituitary	Nervous System	Nervous System	Male	Angus	Angus	Illumina HiSeq 2000	1.25 years	2016-02-16	Angus	Male	Male	Stage4
SAMN04455351	PRJNA311009	Bos taurus	Pituitary	Pituitary	Pituitary	Nervous System	Nervous System	Male	Angus	Angus	Illumina HiSeq 2000	1.25 years	2016-02-16	Angus	Male	Male	Stage4
SAMN04455352	PRJNA311009	Bos taurus	Pituitary	Pituitary	Pituitary	Nervous System	Nervous System	Male	Angus	Angus	Illumina HiSeq 2000	1.25 years	2016-02-16	Angus	Male	Male	Stage4
SAMN04455353	PRJNA311009	Bos taurus	Pituitary	Pituitary	Pituitary	Nervous System	Nervous System	Male	Angus	Angus	Illumina HiSeq 2000	1.25 years	2016-02-16	Angus	Male	Male	Stage4
SAMN04455354	PRJNA311009	Bos taurus	Pituitary	Pituitary	Pituitary	Nervous System	Nervous System	Male	Angus	Angus	Illumina HiSeq 2000	1.25 years	2016-02-16	Angus	Male	Male	Stage4
SAMN04455355	PRJNA311009	Bos taurus	Pituitary	Pituitary	Pituitary	Nervous System	Nervous System	Male	Angus	Angus	Illumina HiSeq 2000	1.25 years	2016-02-16	Angus	Male	Male	Stage4
SAMN04455356	PRJNA311009	Bos taurus	Pituitary	Pituitary	Pituitary	Nervous System	Nervous System	Male	Angus	Angus	Illumina HiSeq 2000	1.25 years	2016-02-16	Angus	Male	Male	Stage4
SAMN04455357	PRJNA311009	Bos taurus	Pituitary	Pituitary	Pituitary	Nervous System	Nervous System	Male	Angus	Angus	Illumina HiSeq 2000	1.25 years	2016-02-16	Angus	Male	Male	Stage4
SAMN04455358	PRJNA311009	Bos taurus	Pituitary	Pituitary	Pituitary	Nervous System	Nervous System	Male	Angus	Angus	Illumina HiSeq 2000	1.25 years	2016-02-16	Angus	Male	Male	Stage4
SAMN04455359	PRJNA311009	Bos taurus	Pituitary	Pituitary	Pituitary	Nervous System	Nervous System	Male	Angus	Angus	Illumina HiSeq 2000	1.25 years	2016-02-16	Angus	Male	Male	Stage4
SAMN04455376	PRJNA311009	Bos taurus	Liver	Liver	Liver	Liver	Liver	Male	Angus	Angus	Illumina HiSeq 2000	1.25 years	2016-02-16	Angus	Male	Male	Stage4
SAMN04455377	PRJNA311009	Bos taurus	Liver	Liver	Liver	Liver	Liver	Male	Angus	Angus	Illumina HiSeq 2000	1.25 years	2016-02-16	Angus	Male	Male	Stage4
SAMN04455378	PRJNA311009	Bos taurus	Liver	Liver	Liver	Liver	Liver	Male	Angus	Angus	Illumina HiSeq 2000	1.25 years	2016-02-16	Angus	Male	Male	Stage4
SAMN04455379	PRJNA311009	Bos taurus	Liver	Liver	Liver	Liver	Liver	Male	Angus	Angus	Illumina HiSeq 2000	1.25 years	2016-02-16	Angus	Male	Male	Stage4
SAMN04455380	PRJNA311009	Bos taurus	Liver	Liver	Liver	Liver	Liver	Male	Angus	Angus	Illumina HiSeq 2000	1.25 years	2016-02-16	Angus	Male	Male	Stage4
SAMN04455381	PRJNA311009	Bos taurus	Liver	Liver	Liver	Liver	Liver	Male	Angus	Angus	Illumina HiSeq 2000	1.25 years	2016-02-16	Angus	Male	Male	Stage4
SAMN04455382	PRJNA311009	Bos taurus	Liver	Liver	Liver	Liver	Liver	Male	Angus	Angus	Illumina HiSeq 2000	1.25 years	2016-02-16	Angus	Male	Male	Stage4
SAMN04455383	PRJNA311009	Bos taurus	Liver	Liver	Liver	Liver	Liver	Male	Angus	Angus	Illumina HiSeq 2000	1.25 years	2016-02-16	Angus	Male	Male	Stage4
SAMN04455384	PRJNA311009	Bos taurus	Liver	Liver	Liver	Liver	Liver	Male	Angus	Angus	Illumina HiSeq 2000	1.25 years	2016-02-16	Angus	Male	Male	Stage4
SAMN04455385	PRJNA311009	Bos taurus	Liver	Liver	Liver	Liver	Liver	Male	Angus	Angus	Illumina HiSeq 2000	1.25 years	2016-02-16	Angus	Male	Male	Stage4
SAMN04455386	PRJNA311009	Bos taurus	Liver	Liver	Liver	Liver	Liver	Male	Angus	Angus	Illumina HiSeq 2000	1.25 years	2016-02-16	Angus	Male	Male	Stage4
SAMN04455387	PRJNA311009	Bos taurus	Liver	Liver	Liver	Liver	Liver	Male	Angus	Angus	Illumina HiSeq 2000	1.25 years	2016-02-16	Angus	Male	Male	Stage4
SAMN04455388	PRJNA311009	Bos taurus	Liver	Liver	Liver	Liver	Liver	Male	Angus	Angus	Illumina HiSeq 2000	1.25 years	2016-02-16	Angus	Male	Male	Stage4
SAMN04455389	PRJNA311009	Bos taurus	Liver	Liver	Liver	Liver	Liver	Male	Angus	Angus	Illumina HiSeq 2000	1.25 years	2016-02-16	Angus	Male	Male	Stage4
SAMN04455390	PRJNA311009	Bos taurus	Liver	Liver	Liver	Liver	Liver	Male	Angus	Angus	Illumina HiSeq 2000	1.25 years	2016-02-16	Angus	Male	Male	Stage4
SAMN04455391	PRJNA311009	Bos taurus	Liver	Liver	Liver	Liver	Liver	Male	Angus	Angus	Illumina HiSeq 2000	1.25 years	2016-02-16	Angus	Male	Male	Stage4
SAMN04455392	PRJNA311009	Bos taurus	Duodenum	Duodenum	Duodenum	Digestive System	Digestive System	Male	Angus	Angus	Illumina HiSeq 2000	1.25 years	2016-02-16	Angus	Male	Male	Stage4
SAMN04455393	PRJNA311009	Bos taurus	Duodenum	Duodenum	Duodenum	Digestive System	Digestive System	Male	Angus	Angus	Illumina HiSeq 2000	1.25 years	2016-02-16	Angus	Male	Male	Stage4
SAMN04455394	PRJNA311009	Bos taurus	Duodenum	Duodenum	Duodenum	Digestive System	Digestive System	Male	Angus	Angus	Illumina HiSeq 2000	1.25 years	2016-02-16	Angus	Male	Male	Stage4
SAMN04455395	PRJNA311009	Bos taurus	Duodenum	Duodenum	Duodenum	Digestive System	Digestive System	Male	Angus	Angus	Illumina HiSeq 2000	1.25 years	2016-02-16	Angus	Male	Male	Stage4
SAMN04455396	PRJNA311009	Bos taurus	Duodenum	Duodenum	Duodenum	Digestive System	Digestive System	Male	Angus	Angus	Illumina HiSeq 2000	1.25 years	2016-02-16	Angus	Male	Male	Unknown
SAMN04455397	PRJNA311009	Bos taurus	Duodenum	Duodenum	Duodenum	Digestive System	Digestive System	Male	Angus	Angus	Illumina HiSeq 2000	1.25 years	2016-02-16	Angus	Male	Male	Stage4
SAMN04455398	PRJNA311009	Bos taurus	Duodenum	Duodenum	Duodenum	Digestive System	Digestive System	Male	Angus	Angus	Illumina HiSeq 2000	1.25 years	2016-02-16	Angus	Male	Male	Stage4
SAMN04455399	PRJNA311009	Bos taurus	Duodenum	Duodenum	Duodenum	Digestive System	Digestive System	Male	Angus	Angus	Illumina HiSeq 2000	1.25 years	2016-02-16	Angus	Male	Male	Stage4
SAMN04455400	PRJNA311009	Bos taurus	Duodenum	Duodenum	Duodenum	Digestive System	Digestive System	Male	Angus	Angus	Illumina HiSeq 2000	1.25 years	2016-02-16	Angus	Male	Male	Stage4
SAMN04455401	PRJNA311009	Bos taurus	Duodenum	Duodenum	Duodenum	Digestive System	Digestive System	Male	Angus	Angus	Illumina HiSeq 2000	1.25 years	2016-02-16	Angus	Male	Male	Stage4
SAMN04455402	PRJNA311009	Bos taurus	Duodenum	Duodenum	Duodenum	Digestive System	Digestive System	Male	Angus	Angus	Illumina HiSeq 2000	1.25 years	2016-02-16	Angus	Male	Male	Stage4
SAMN04455403	PRJNA311009	Bos taurus	Duodenum	Duodenum	Duodenum	Digestive System	Digestive System	Male	Angus	Angus	Illumina HiSeq 2000	1.25 years	2016-02-16	Angus	Male	Male	Stage4
SAMN04455404	PRJNA311009	Bos taurus	Duodenum	Duodenum	Duodenum	Digestive System	Digestive System	Male	Angus	Angus	Illumina HiSeq 2000	1.25 years	2016-02-16	Angus	Male	Male	Stage4
SAMN04455405	PRJNA311009	Bos taurus	Duodenum	Duodenum	Duodenum	Digestive System	Digestive System	Male	Angus	Angus	Illumina HiSeq 2000	1.25 years	2016-02-16	Angus	Male	Male	Stage4
SAMN04455406	PRJNA311009	Bos taurus	Duodenum	Duodenum	Duodenum	Digestive System	Digestive System	Male	Angus	Angus	Illumina HiSeq 2000	1.25 years	2016-02-16	Angus	Male	Male	Stage4
SAMN04510279	PRJNA312901	Bos taurus	Rumen Epithelial	Rumen	Rumen	Digestive System	Digestive System	Unknown	Unknown	Unknown	Illumina HiSeq 2000	Unknown	2017-06-09	Holstein	Female	Female	Stage5
SAMN04510280	PRJNA312901	Bos taurus	Rumen Epithelial	Rumen	Rumen	Digestive System	Digestive System	Unknown	Unknown	Unknown	Illumina HiSeq 2000	Unknown	2017-06-09	Holstein	Female	Female	Stage5
SAMN04510281	PRJNA312901	Bos taurus	Rumen Epithelial	Rumen	Rumen	Digestive System	Digestive System	Unknown	Unknown	Unknown	Illumina HiSeq 2000	Unknown	2017-06-09	Holstein	Female	Female	Stage5
SAMN04510282	PRJNA312901	Bos taurus	Rumen Epithelial	Rumen	Rumen	Digestive System	Digestive System	Unknown	Unknown	Unknown	Illumina HiSeq 2000	Unknown	2017-06-09	Holstein	Female	Female	Stage5
SAMN04510283	PRJNA312901	Bos taurus	Rumen Epithelial	Rumen	Rumen	Digestive System	Digestive System	Unknown	Unknown	Unknown	Illumina HiSeq 2000	Unknown	2017-06-09	Holstein	Female	Female	Stage5
SAMN04510284	PRJNA312901	Bos taurus	Rumen Epithelial	Rumen	Rumen	Digestive System	Digestive System	Unknown	Unknown	Unknown	Illumina HiSeq 2000	Unknown	2017-06-09	Holstein	Female	Female	Stage5
SAMN04510285	PRJNA312901	Bos taurus	Rumen Epithelial	Rumen	Rumen	Digestive System	Digestive System	Unknown	Unknown	Unknown	Illumina HiSeq 2000	Unknown	2017-06-09	Holstein	Female	Female	Stage5
SAMN04510286	PRJNA312901	Bos taurus	Rumen Epithelial	Rumen	Rumen	Digestive System	Digestive System	Unknown	Unknown	Unknown	Illumina HiSeq 2000	Unknown	2017-06-09	Holstein	Female	Female	Stage5
SAMN04510287	PRJNA312901	Bos taurus	Rumen Epithelial	Rumen	Rumen	Digestive System	Digestive System	Unknown	Unknown	Unknown	Illumina HiSeq 2000	Unknown	2017-06-09	Holstein	Female	Female	Stage5
SAMN04510288	PRJNA312901	Bos taurus	Rumen Epithelial	Rumen	Rumen	Digestive System	Digestive System	Unknown	Unknown	Unknown	Illumina HiSeq 2000	Unknown	2017-06-09	Holstein	Female	Female	Stage5
SAMN04510289	PRJNA312901	Bos taurus	Rumen Epithelial	Rumen	Rumen	Digestive System	Digestive System	Unknown	Unknown	Unknown	Illumina HiSeq 2000	Unknown	2017-06-09	Holstein	Female	Female	Stage5
SAMN04510290	PRJNA312901	Bos taurus	Rumen Epithelial	Rumen	Rumen	Digestive System	Digestive System	Unknown	Unknown	Unknown	Illumina HiSeq 2000	Unknown	2017-06-09	Holstein	Female	Female	Stage5
SAMN04510292	PRJNA312901	Bos taurus	Rumen Epithelial	Rumen	Rumen	Digestive System	Digestive System	Unknown	Unknown	Unknown	Illumina HiSeq 2000	Unknown	2017-06-09	Holstein	Female	Female	Stage5
SAMN04510293	PRJNA312901	Bos taurus	Rumen Epithelial	Rumen	Rumen	Digestive System	Digestive System	Unknown	Unknown	Unknown	Illumina HiSeq 2000	Unknown	2017-06-09	Holstein	Female	Female	Stage5
SAMN04510294	PRJNA312901	Bos taurus	Rumen Epithelial	Rumen	Rumen	Digestive System	Digestive System	Unknown	Unknown	Unknown	Illumina HiSeq 2000	Unknown	2017-06-09	Holstein	Female	Female	Stage5
SAMN04510295	PRJNA312901	Bos taurus	Rumen Epithelial	Rumen	Rumen	Digestive System	Digestive System	Unknown	Unknown	Unknown	Illumina HiSeq 2000	Unknown	2017-06-09	Holstein	Female	Female	Stage5
SAMN04516767	PRJNA313206	Bos taurus	Mammary Gland Epithelial	Mammary Gland	Liver	Mammary Gland	Liver	Female	Unknown	Unknown	Illumina HiSeq 2000	Unknown	2019-02-20	Holstein	Female	Female	Stage5
SAMN04516768	PRJNA313206	Bos taurus	Mammary Gland Epithelial	Mammary Gland	Liver	Mammary Gland	Liver	Female	Unknown	Unknown	Illumina HiSeq 2000	Unknown	2019-02-20	Holstein	Female	Female	Stage5
SAMN04516769	PRJNA313206	Bos taurus	Mammary Gland Epithelial	Mammary Gland	Liver	Mammary Gland	Liver	Female	Unknown	Unknown	Illumina HiSeq 2000	Unknown	2019-02-20	Holstein	Female	Female	Stage5
SAMN04516770	PRJNA313206	Bos taurus	Mammary Gland Epithelial	Mammary Gland	Liver	Mammary Gland	Liver	Female	Unknown	Unknown	Illumina HiSeq 2000	Unknown	2019-02-20	Holstein	Female	Female	Stage5
SAMN04516771	PRJNA313206	Bos taurus	Mammary Gland Epithelial	Mammary Gland	Liver	Mammary Gland	Liver	Female	Unknown	Unknown	Illumina HiSeq 2000	Unknown	2019-02-20	Holstein	Female	Female	Stage5
SAMN04516772	PRJNA313206	Bos taurus	Mammary Gland Epithelial	Mammary Gland	Liver	Mammary Gland	Liver	Female	Unknown	Unknown	Illumina HiSeq 2000	Unknown	2019-02-20	Holstein	Female	Female	Stage5
SAMN04516773	PRJNA313206	Bos taurus	Mammary Gland Epithelial	Mammary Gland	Liver	Mammary Gland	Liver	Female	Unknown	Unknown	Illumina HiSeq 2000	Unknown	2019-02-20	Holstein	Female	Female	Stage5
SAMN04516774	PRJNA313206	Bos taurus	Mammary Gland Epithelial	Mammary Gland	Liver	Mammary Gland	Liver	Female	Unknown	Unknown	Illumina HiSeq 2000	Unknown	2019-02-20	Holstein	Female	Female	Unknown
SAMN04516775	PRJNA313206	Bos taurus	Mammary Gland Epithelial	Mammary Gland	Liver	Mammary Gland	Liver	Female	Unknown	Unknown	Illumina HiSeq 2000	Unknown	2019-02-20	Holstein	Female	Female	Stage5
SAMN04516776	PRJNA313206	Bos taurus	Mammary Gland Epithelial	Mammary Gland	Liver	Mammary Gland	Liver	Female	Unknown	Unknown	Illumina HiSeq 2000	Unknown	2019-02-20	Holstein	Female	Female	Stage5
SAMN04516777	PRJNA313206	Bos taurus	Mammary Gland Epithelial	Mammary Gland	Liver	Mammary Gland	Liver	Female	Unknown	Unknown	Illumina HiSeq 2000	Unknown	2019-02-20	Holstein	Female	Female	Unknown
SAMN04516778	PRJNA313206	Bos taurus	Mammary Gland Epithelial	Mammary Gland	Liver	Mammary Gland	Liver	Female	Unknown	Unknown	Illumina HiSeq 2000	Unknown	2019-02-20	Holstein	Female	Female	Stage5
SAMN04516779	PRJNA313206	Bos taurus	Jejunum	Jejunum	Jejunum	Digestive System	Digestive System	Unknown	Unknown	Unknown	Illumina HiSeq 2000	Unknown	2019-02-20	Holstein	Female	Female	Stage5
SAMN04516784	PRJNA313206	Bos taurus	Jejunum	Jejunum	Jejunum	Digestive System	Digestive System	Unknown	Unknown	Unknown	Illumina HiSeq 2000	Unknown	2019-02-20	Holstein	Female	Female	Stage5
SAMN04516794	PRJNA313206	Bos taurus	Liver	Liver	Jejunum	Liver	Digestive System	Unknown	Unknown	Unknown	Illumina HiSeq 2000	Unknown	2019-02-20	Holstein	Female	Female	Stage5
SAMN04516796	PRJNA313206	Bos taurus	Liver	Liver	Jejunum	Liver	Digestive System	Unknown	Unknown	Unknown	Illumina HiSeq 2000	Unknown	2019-02-20	Holstein	Female	Female	Stage5
SAMN04516799	PRJNA313206	Bos taurus	Liver	Liver	Jejunum	Liver	Digestive System	Unknown	Unknown	Unknown	Illumina HiSeq 2000	Unknown	2019-02-20	Holstein	Female	Female	Stage5
SAMN04516800	PRJNA313206	Bos taurus	Liver	Liver	Jejunum	Liver	Digestive System	Unknown	Unknown	Unknown	Illumina HiSeq 2000	Unknown	2019-02-20	Holstein	Female	Female	Stage5
SAMN04516801	PRJNA313206	Bos taurus	Liver	Liver	Jejunum	Liver	Digestive System	Unknown	Unknown	Unknown	Illumina HiSeq 2000	Unknown	2019-02-20	Holstein	Female	Female	Stage5
SAMN04516802	PRJNA313206	Bos taurus	Liver	Liver	Jejunum	Liver	Digestive System	Unknown	Unknown	Unknown	Illumina HiSeq 2000	Unknown	2019-02-20	Holstein	Female	Female	Stage5
SAMN04516803	PRJNA313206	Bos taurus	Mammary Gland Epithelial	Mammary Gland	Liver	Mammary Gland	Liver	Unknown	Unknown	Unknown	Illumina HiSeq 2000	Unknown	2019-02-20	Holstein	Female	Female	Stage5
SAMN04516804	PRJNA313206	Bos taurus	Mammary Gland Epithelial	Mammary Gland	Liver	Mammary Gland	Liver	Unknown	Unknown	Unknown	Illumina HiSeq 2000	Unknown	2019-02-20	Holstein	Female	Female	Stage5
SAMN04516805	PRJNA313206	Bos taurus	Mammary Gland Epithelial	Mammary Gland	Liver	Mammary Gland	Liver	Unknown	Unknown	Unknown	Illumina HiSeq 2000	Unknown	2019-02-20	Holstein	Female	Female	Stage5
SAMN04516806	PRJNA313206	Bos taurus	Mammary Gland Epithelial	Mammary Gland	Liver	Mammary Gland	Liver	Unknown	Unknown	Unknown	Illumina HiSeq 2000	Unknown	2019-02-20	Holstein	Female	Female	Stage5
SAMN04516807	PRJNA313206	Bos taurus	Mammary Gland Epithelial	Mammary Gland	Liver	Mammary Gland	Liver	Unknown	Unknown	Unknown	Illumina HiSeq 2000	Unknown	2019-02-20	Holstein	Female	Female	Stage5
SAMN04516808	PRJNA313206	Bos taurus	Mammary Gland Epithelial	Mammary Gland	Liver	Mammary Gland	Liver	Unknown	Unknown	Unknown	Illumina HiSeq 2000	Unknown	2019-02-20	Holstein	Female	Female	Stage5
SAMN04516809	PRJNA313206	Bos taurus	Duodenum	Duodenum	Duodenum	Digestive System	Digestive System	Unknown	Unknown	Unknown	Illumina HiSeq 2000	Unknown	2019-02-20	Holstein	Female	Female	Stage5
SAMN04516811	PRJNA313206	Bos taurus	Duodenum	Duodenum	Duodenum	Digestive System	Digestive System	Unknown	Unknown	Unknown	Illumina HiSeq 2000	Unknown	2019-02-20	Holstein	Female	Female	Stage5
SAMN04516812	PRJNA313206	Bos taurus	Duodenum	Duodenum	Duodenum	Digestive System	Digestive System	Unknown	Unknown	Unknown	Illumina HiSeq 2000	Unknown	2019-02-20	Holstein	Female	Female	Stage5
SAMN04516813	PRJNA313206	Bos taurus	Duodenum	Duodenum	Duodenum	Digestive System	Digestive System	Unknown	Unknown	Unknown	Illumina HiSeq 2000	Unknown	2019-02-20	Holstein	Female	Female	Stage5
SAMN04516814	PRJNA313206	Bos taurus	Duodenum	Duodenum	Duodenum	Digestive System	Digestive System	Unknown	Unknown	Unknown	Illumina HiSeq 2000	Unknown	2019-02-20	Holstein	Female	Female	Stage5
SAMN04516815	PRJNA313206	Bos taurus	Duodenum	Duodenum	Duodenum	Digestive System	Digestive System	Unknown	Unknown	Unknown	Illumina HiSeq 2000	Unknown	2019-02-20	Holstein	Female	Female	Stage5
SAMN04516816	PRJNA313206	Bos taurus	Duodenum	Duodenum	Duodenum	Digestive System	Digestive System	Unknown	Unknown	Unknown	Illumina HiSeq 2000	Unknown	2019-02-20	Holstein	Female	Female	Stage5
SAMN04516817	PRJNA313206	Bos taurus	Duodenum	Duodenum	Duodenum	Digestive System	Digestive System	Unknown	Unknown	Unknown	Illumina HiSeq 2000	Unknown	2019-02-20	Holstein	Female	Female	Stage5
SAMN04516818	PRJNA313206	Bos taurus	Duodenum	Duodenum	Duodenum	Digestive System	Digestive System	Unknown	Unknown	Unknown	Illumina HiSeq 2000	Unknown	2019-02-20	Holstein	Female	Female	Stage5
SAMN04516819	PRJNA313206	Bos taurus	Duodenum	Duodenum	Duodenum	Digestive System	Digestive System	Unknown	Unknown	Unknown	Illumina HiSeq 2000	Unknown	2019-02-20	Holstein	Female	Female	Stage5
SAMN04516820	PRJNA313206	Bos taurus	Duodenum	Duodenum	Duodenum	Digestive System	Digestive System	Unknown	Unknown	Unknown	Illumina HiSeq 2000	Unknown	2019-02-20	Holstein	Female	Female	Stage5
SAMN04516821	PRJNA313206	Bos taurus	Duodenum	Duodenum	Duodenum	Digestive System	Digestive System	Unknown	Unknown	Unknown	Illumina HiSeq 2000	Unknown	2019-02-20	Holstein	Female	Female	Stage5
SAMN04516822	PRJNA313206	Bos taurus	Duodenum	Duodenum	Duodenum	Digestive System	Digestive System	Unknown	Unknown	Unknown	Illumina HiSeq 2000	Unknown	2019-02-20	Holstein	Female	Female	Stage5
SAMN04516823	PRJNA313206	Bos taurus	Duodenum	Duodenum	Duodenum	Digestive System	Digestive System	Unknown	Unknown	Unknown	Illumina HiSeq 2000	Unknown	2019-02-20	Holstein	Female	Female	Stage5
SAMN04516824	PRJNA313206	Bos taurus	Duodenum	Duodenum	Duodenum	Digestive System	Digestive System	Unknown	Unknown	Unknown	Illumina HiSeq 2000	Unknown	2019-02-20	Holstein	Female	Female	Stage5
SAMN04516825	PRJNA313206	Bos taurus	Duodenum	Duodenum	Duodenum	Digestive System	Digestive System	Unknown	Unknown	Unknown	Illumina HiSeq 2000	Unknown	2019-02-20	Holstein	Female	Female	Stage5
SAMN04516826	PRJNA313206	Bos taurus	Duodenum	Duodenum	Duodenum	Digestive System	Digestive System	Unknown	Unknown	Unknown	Illumina HiSeq 2000	Unknown	2019-02-20	Holstein	Female	Female	Stage5
SAMN04516827	PRJNA313206	Bos taurus	Jejunum Epithelial	Jejunum	Jejunum	Digestive System	Digestive System	Unknown	Unknown	Unknown	Illumina HiSeq 2000	Unknown	2019-02-20	Holstein	Female	Female	Stage5
SAMN04516828	PRJNA313206	Bos taurus	Jejunum	Jejunum	Jejunum	Digestive System	Digestive System	Unknown	Unknown	Unknown	Illumina HiSeq 2000	Unknown	2019-02-20	Holstein	Female	Female	Stage5
SAMN04516829	PRJNA313206	Bos taurus	Jejunum Epithelial	Jejunum	Jejunum	Digestive System	Digestive System	Unknown	Unknown	Unknown	Illumina HiSeq 2000	Unknown	2019-02-20	Holstein	Female	Female	Stage5
SAMN04516830	PRJNA313206	Bos taurus	Jejunum	Jejunum	Jejunum	Digestive System	Digestive System	Unknown	Unknown	Unknown	Illumina HiSeq 2000	Unknown	2019-02-20	Holstein	Female	Female	Stage5
SAMN04516831	PRJNA313206	Bos taurus	Jejunum	Jejunum	Jejunum	Digestive System	Digestive System	Unknown	Unknown	Unknown	Illumina HiSeq 2000	Unknown	2019-02-20	Holstein	Female	Female	Stage5
SAMN04516832	PRJNA313206	Bos taurus	Jejunum	Jejunum	Jejunum	Digestive System	Digestive System	Unknown	Unknown	Unknown	Illumina HiSeq 2000	Unknown	2019-02-20	Holstein	Female	Female	Stage5
SAMN04516833	PRJNA313206	Bos taurus	Jejunum	Jejunum	Jejunum	Digestive System	Digestive System	Unknown	Unknown	Unknown	Illumina HiSeq 2000	Unknown	2019-02-20	Holstein	Female	Female	Stage5
SAMN04516834	PRJNA313206	Bos taurus	Jejunum	Jejunum	Jejunum	Digestive System	Digestive System	Unknown	Unknown	Unknown	Illumina HiSeq 2000	Unknown	2019-02-20	Holstein	Female	Female	Stage5
SAMN04516837	PRJNA313206	Bos taurus	Jejunum	Jejunum	Jejunum	Digestive System	Digestive System	Unknown	Unknown	Unknown	Illumina HiSeq 2000	Unknown	2019-02-20	Holstein	Female	Female	Stage5
SAMN04516838	PRJNA313206	Bos taurus	Jejunum	Jejunum	Jejunum	Digestive System	Digestive System	Unknown	Unknown	Unknown	Illumina HiSeq 2000	Unknown	2019-02-20	Holstein	Female	Female	Stage5
SAMN04516921	PRJNA313210	Bos taurus	Seminiferous Tubule	Testis	Testis	Male Reproductive System	Male Reproductive System	Male	Unknown	Unknown	Illumina HiSeq 2500	3 months	2019-02-19	Charolais	Male	Male	Stage5
SAMN04516922	PRJNA313210	Bos taurus	Seminiferous Tubule	Testis	Testis	Male Reproductive System	Male Reproductive System	Male	Unknown	Unknown	Illumina HiSeq 2500	9 months	2019-02-19	Angus	Male	Male	Stage5
SAMN04546400	PRJNA314981	Bos taurus	Placenta	Placenta	Placenta	Female Reproductive System	Female Reproductive System	Unknown	Unknown	Unknown	Illumina Genome Analyzer II	Unknown	2017-05-15	Holstein	Female	Female	Stage1
SAMN04588720	PRJNA316613	Bos taurus	Blood	Blood	Blood	Immune System	Immune System	Unknown	Unknown	Unknown	Illumina HiSeq 3000	Unknown	2019-02-19	Angus	Male	Male	Stage2
SAMN04588721	PRJNA316613	Bos taurus	Blood	Blood	Blood	Immune System	Immune System	Unknown	Unknown	Unknown	Illumina HiSeq 3000	Unknown	2019-02-19	Angus	Female	Female	Stage2
SAMN04588722	PRJNA316613	Bos taurus	Blood	Blood	Blood	Immune System	Immune System	Unknown	Unknown	Unknown	Illumina HiSeq 3000	Unknown	2019-02-19	Angus	Male	Male	Unknown
SAMN04588723	PRJNA316613	Bos taurus	Blood	Blood	Blood	Immune System	Immune System	Unknown	Unknown	Unknown	Illumina HiSeq 3000	Unknown	2019-02-19	Angus	Male	Male	Stage2
SAMN04588724	PRJNA316613	Bos taurus	Blood	Blood	Blood	Immune System	Immune System	Unknown	Unknown	Unknown	Illumina HiSeq 3000	Unknown	2019-02-19	Angus	Male	Male	Unknown
SAMN04588725	PRJNA316613	Bos taurus	Blood	Blood	Blood	Immune System	Immune System	Unknown	Unknown	Unknown	Illumina HiSeq 3000	Unknown	2019-02-19	Angus	Male	Male	Stage2
SAMN04588726	PRJNA316613	Bos taurus	Blood	Blood	Blood	Immune System	Immune System	Unknown	Unknown	Unknown	Illumina HiSeq 3000	Unknown	2019-02-19	Angus	Male	Male	Unknown
SAMN04588727	PRJNA316613	Bos taurus	Blood	Blood	Blood	Immune System	Immune System	Unknown	Unknown	Unknown	Illumina HiSeq 3000	Unknown	2019-02-19	Angus	Male	Male	Unknown
SAMN04588728	PRJNA316613	Bos taurus	Blood	Blood	Blood	Immune System	Immune System	Unknown	Unknown	Unknown	Illumina HiSeq 3000	Unknown	2019-02-19	Angus	Male	Male	Unknown
SAMN04588729	PRJNA316613	Bos taurus	Blood	Blood	Blood	Immune System	Immune System	Unknown	Unknown	Unknown	Illumina HiSeq 3000	Unknown	2019-02-19	Hereford	Male	Male	Stage2
SAMN04867183	PRJNA318751	Bos taurus	Mammary Gland	Mammary Gland	Mammary Gland	Mammary Gland	Mammary Gland	Female	Holstein	Holstein	Illumina HiSeq 2000	2-3 years	2016-11-21	Holstein	Female	Female	Stage5
SAMN04867184	PRJNA318751	Bos taurus	Mammary Gland	Mammary Gland	Mammary Gland	Mammary Gland	Mammary Gland	Female	Holstein	Holstein	Illumina HiSeq 2000	2-3 years	2016-11-21	Holstein	Female	Female	Stage5
SAMN04924833	PRJNA320206	Bos grunniens	Testis	Testis	Testis	Male Reproductive System	Male Reproductive System	Male	Maiwa	Yak	Illumina HiSeq 2000	adult(>4 years old)	2017-01-19	Yak	Male	Male	Stage5
SAMN04992973	PRJNA321384	Bos taurus	Testis	Testis	Testis	Male Reproductive System	Male Reproductive System	Male	Unknown	Unknown	Illumina HiSeq 2000	12 months	2016-10-02	Yak	Male	Male	Stage3
SAMN04994867	PRJNA321468	Bos taurus	Testis	Testis	Testis	Male Reproductive System	Male Reproductive System	Male	Unknown	Unknown	Illumina HiSeq 2000	12 months	2016-10-02	Yak	Male	Male	Stage3
SAMN04999934	PRJNA321552	Bos taurus	Testis	Testis	Testis	Male Reproductive System	Male Reproductive System	Male	Unknown	Unknown	Illumina HiSeq 2000	12 months	2016-10-02	Yak	Male	Male	Stage3
SAMN05000878	PRJNA321608	Bos taurus	Endometrium	Uterus	Uterus	Female Reproductive System	Female Reproductive System	Female	Unknown	Unknown	Illumina HiSeq 2500	Unknown	2016-05-17	Angus	Female	Female	Unknown
SAMN05000881	PRJNA321608	Bos taurus	Endometrium	Uterus	Uterus	Female Reproductive System	Female Reproductive System	Female	Unknown	Unknown	Illumina HiSeq 2500	Unknown	2016-05-17	Angus	Female	Female	Stage1
SAMN05000883	PRJNA321608	Bos taurus	Endometrium	Uterus	Uterus	Female Reproductive System	Female Reproductive System	Female	Unknown	Unknown	Illumina HiSeq 2500	Unknown	2016-05-17	Angus	Female	Female	Stage1
SAMN05000884	PRJNA321608	Bos taurus	Endometrium	Uterus	Uterus	Female Reproductive System	Female Reproductive System	Female	Unknown	Unknown	Illumina HiSeq 2500	Unknown	2016-05-17	Angus	Female	Female	Unknown
SAMN05000887	PRJNA321608	Bos taurus	Endometrium	Uterus	Uterus	Female Reproductive System	Female Reproductive System	Female	Unknown	Unknown	Illumina HiSeq 2500	Unknown	2016-05-17	Angus	Female	Female	Unknown
SAMN05000888	PRJNA321608	Bos taurus	Endometrium	Uterus	Uterus	Female Reproductive System	Female Reproductive System	Female	Unknown	Unknown	Illumina HiSeq 2500	Unknown	2016-05-17	Angus	Female	Female	Stage1
SAMN05000889	PRJNA321608	Bos taurus	Endometrium	Uterus	Uterus	Female Reproductive System	Female Reproductive System	Female	Unknown	Unknown	Illumina HiSeq 2500	Unknown	2016-05-17	Angus	Female	Female	Stage1
SAMN05000891	PRJNA321608	Bos taurus	Endometrium	Uterus	Uterus	Female Reproductive System	Female Reproductive System	Female	Unknown	Unknown	Illumina HiSeq 2500	Unknown	2016-05-17	Hereford	Female	Female	Stage1
SAMN05410618	PRJNA329305	Bos taurus	Retroperitoneal Lymph Node	Lymph Node	Lymph Node	Immune System	Immune System	Male	Holstein	Holstein	Illumina HiSeq 2500	12 months	2016-07-26	Holstein	Male	Male	Stage3
SAMN05410619	PRJNA329305	Bos taurus	Retroperitoneal Lymph Node	Lymph Node	Lymph Node	Immune System	Immune System	Male	Holstein	Holstein	Illumina HiSeq 2500	12 months	2016-07-26	Holstein	Male	Male	Stage3
SAMN05410620	PRJNA329305	Bos taurus	Retroperitoneal Lymph Node	Lymph Node	Lymph Node	Immune System	Immune System	Male	Holstein	Holstein	Illumina HiSeq 2500	12 months	2016-07-26	Holstein	Male	Male	Stage3
SAMN05410621	PRJNA329305	Bos taurus	Retroperitoneal Lymph Node	Lymph Node	Lymph Node	Immune System	Immune System	Male	Holstein	Holstein	Illumina HiSeq 2500	12 months	2016-07-26	Holstein	Male	Male	Stage3
SAMN05410622	PRJNA329305	Bos taurus	Retroperitoneal Lymph Node	Lymph Node	Lymph Node	Immune System	Immune System	Male	Holstein	Holstein	Illumina HiSeq 2500	12 months	2016-07-26	Holstein	Male	Male	Stage3
SAMN05410623	PRJNA329305	Bos taurus	Retroperitoneal Lymph Node	Lymph Node	Lymph Node	Immune System	Immune System	Male	Holstein	Holstein	Illumina HiSeq 2500	12 months	2016-07-26	Holstein	Male	Male	Stage3
SAMN05410624	PRJNA329305	Bos taurus	Retroperitoneal Lymph Node	Lymph Node	Lymph Node	Immune System	Immune System	Male	Holstein	Holstein	Illumina HiSeq 2500	12 months	2016-07-26	Holstein	Male	Male	Stage3
SAMN05410625	PRJNA329305	Bos taurus	Retroperitoneal Lymph Node	Lymph Node	Lymph Node	Immune System	Immune System	Male	Holstein	Holstein	Illumina HiSeq 2500	12 months	2016-07-26	Holstein	Male	Male	Stage3
SAMN05410626	PRJNA329305	Bos taurus	Retroperitoneal Lymph Node	Lymph Node	Lymph Node	Immune System	Immune System	Male	Holstein	Holstein	Illumina HiSeq 2500	12 months	2016-07-26	Holstein	Male	Male	Stage3
SAMN05410627	PRJNA329305	Bos taurus	Retroperitoneal Lymph Node	Lymph Node	Lymph Node	Immune System	Immune System	Male	Holstein	Holstein	Illumina HiSeq 2500	12 months	2016-07-26	Holstein	Male	Male	Stage3
SAMN05441805	PRJNA335422	Bos taurus	Blood	Blood	Blood	Immune System	Immune System	Unknown	Holstein	Holstein	Illumina HiSeq 2000	6 months	2018-07-31	Holstein	Male	Male	Stage2
SAMN05441807	PRJNA335422	Bos taurus	Blood	Blood	Blood	Immune System	Immune System	Unknown	Holstein	Holstein	Illumina HiSeq 2000	6 months	2018-07-31	Holstein	Male	Male	Stage2
SAMN05441812	PRJNA335422	Bos taurus	Blood	Blood	Blood	Immune System	Immune System	Unknown	Holstein	Holstein	Illumina HiSeq 2000	6 months	2018-07-31	Holstein	Male	Male	Stage2
SAMN05441814	PRJNA335422	Bos taurus	Blood	Blood	Blood	Immune System	Immune System	Unknown	Holstein	Holstein	Illumina HiSeq 2000	6 months	2018-07-31	Holstein	Male	Male	Stage2
SAMN05441818	PRJNA335422	Bos taurus	Blood	Blood	Blood	Immune System	Immune System	Unknown	Holstein	Holstein	Illumina HiSeq 2000	6 months	2018-07-31	Holstein	Male	Male	Stage2
SAMN05441830	PRJNA335422	Bos taurus	Blood	Blood	Blood	Immune System	Immune System	Unknown	Holstein	Holstein	Illumina HiSeq 2000	6 months	2018-07-31	Holstein	Male	Female	Stage2
SAMN05441855	PRJNA335422	Bos taurus	Blood	Blood	Blood	Immune System	Immune System	Unknown	Holstein	Holstein	Illumina HiSeq 2000	6 months	2018-07-31	Holstein	Male	Female	Stage2
SAMN05441856	PRJNA335422	Bos taurus	Blood	Blood	Blood	Immune System	Immune System	Unknown	Holstein	Holstein	Illumina HiSeq 2000	6 months	2018-07-31	Holstein	Male	Male	Stage2
SAMN05441869	PRJNA335422	Bos taurus	Blood	Blood	Blood	Immune System	Immune System	Unknown	Holstein	Holstein	Illumina HiSeq 2000	6 months	2018-07-31	Holstein	Male	Male	Stage2
SAMN05441879	PRJNA335422	Bos taurus	Blood	Blood	Blood	Immune System	Immune System	Unknown	Holstein	Holstein	Illumina HiSeq 2000	6 months	2018-07-31	Holstein	Male	Male	Stage2
SAMN05441886	PRJNA335422	Bos taurus	Blood	Blood	Blood	Immune System	Immune System	Unknown	Holstein	Holstein	Illumina HiSeq 2000	6 months	2018-07-31	Holstein	Male	Male	Stage2
SAMN05441889	PRJNA335422	Bos taurus	Blood	Blood	Blood	Immune System	Immune System	Unknown	Holstein	Holstein	Illumina HiSeq 2000	6 months	2018-07-31	Holstein	Male	Male	Stage2
SAMN05441897	PRJNA335422	Bos taurus	Blood	Blood	Blood	Immune System	Immune System	Unknown	Holstein	Holstein	Illumina HiSeq 2000	6 months	2018-07-31	Holstein	Male	Male	Stage2
SAMN05441922	PRJNA335422	Bos taurus	Blood	Blood	Blood	Immune System	Immune System	Unknown	Holstein	Holstein	Illumina HiSeq 2000	6 months	2018-07-31	Holstein	Male	Male	Stage2
SAMN05441951	PRJNA335422	Bos taurus	Blood	Blood	Blood	Immune System	Immune System	Unknown	Holstein	Holstein	Illumina HiSeq 2000	6 months	2018-07-31	Holstein	Male	Male	Stage2
SAMN05441960	PRJNA335422	Bos taurus	Blood	Blood	Blood	Immune System	Immune System	Unknown	Holstein	Holstein	Illumina HiSeq 2000	6 months	2018-07-31	Holstein	Male	Female	Stage2
SAMN05442011	PRJNA335422	Bos taurus	Blood	Blood	Blood	Immune System	Immune System	Unknown	Holstein	Holstein	Illumina HiSeq 2000	6 months	2018-07-31	Holstein	Male	Male	Stage2
SAMN05442013	PRJNA335422	Bos taurus	Blood	Blood	Blood	Immune System	Immune System	Unknown	Holstein	Holstein	Illumina HiSeq 2000	6 months	2018-07-31	Holstein	Male	Male	Stage2
SAMN05520744	PRJNA338058	Bos taurus	Distal Jejunum	Jejunum	Jejunum	Digestive System	Digestive System	Unknown	Unknown	Unknown	Illumina HiSeq 2000	Unknown	2017-08-22	Simmental	Male	Male	Unknown
SAMN05520748	PRJNA338058	Bos taurus	Duodenum	Duodenum	Duodenum	Digestive System	Digestive System	Unknown	Unknown	Unknown	Illumina HiSeq 2000	Unknown	2017-08-22	Angus	Male	Male	Stage2
SAMN05520749	PRJNA338058	Bos taurus	Descending Colon	Colon	Colon	Digestive System	Digestive System	Unknown	Unknown	Unknown	Illumina HiSeq 2000	Unknown	2017-08-22	Angus	Male	Male	Stage5
SAMN05520750	PRJNA338058	Bos taurus	Descending Colon	Colon	Colon	Digestive System	Digestive System	Unknown	Unknown	Unknown	Illumina HiSeq 2000	Unknown	2017-08-22	Hereford	Male	Male	Stage5
SAMN05520752	PRJNA338058	Bos taurus	Distal Jejunum	Jejunum	Jejunum	Digestive System	Digestive System	Unknown	Unknown	Unknown	Illumina HiSeq 2000	Unknown	2017-08-22	Hereford	Male	Male	Stage2
SAMN05520754	PRJNA338058	Bos taurus	Caecum	Large Intestine	Large Intestine	Digestive System	Digestive System	Unknown	Unknown	Unknown	Illumina HiSeq 2000	Unknown	2017-08-22	Hereford	Male	Male	Stage5
SAMN05520755	PRJNA338058	Bos taurus	Duodenum	Duodenum	Duodenum	Digestive System	Digestive System	Unknown	Unknown	Unknown	Illumina HiSeq 2000	Unknown	2017-08-22	Hereford	Male	Male	Stage5
SAMN05520757	PRJNA338058	Bos taurus	Spiral Colon	Colon	Colon	Digestive System	Digestive System	Unknown	Unknown	Unknown	Illumina HiSeq 2000	Unknown	2017-08-22	Angus	Male	Male	Unknown
SAMN05520759	PRJNA338058	Bos taurus	Proximal Jejunum	Jejunum	Jejunum	Digestive System	Digestive System	Unknown	Unknown	Unknown	Illumina HiSeq 2000	Unknown	2017-08-22	Angus	Male	Male	Unknown
SAMN05520760	PRJNA338058	Bos taurus	Caecum	Large Intestine	Large Intestine	Digestive System	Digestive System	Unknown	Unknown	Unknown	Illumina HiSeq 2000	Unknown	2017-08-22	Angus	Male	Male	Unknown
SAMN05520761	PRJNA338058	Bos taurus	Duodenum	Duodenum	Duodenum	Digestive System	Digestive System	Unknown	Unknown	Unknown	Illumina HiSeq 2000	Unknown	2017-08-22	Angus	Male	Male	Stage5
SAMN05520762	PRJNA338058	Bos taurus	Descending Colon	Colon	Colon	Digestive System	Digestive System	Unknown	Unknown	Unknown	Illumina HiSeq 2000	Unknown	2017-08-22	Angus	Male	Male	Stage5
SAMN05520765	PRJNA338058	Bos taurus	Proximal Jejunum	Jejunum	Jejunum	Digestive System	Digestive System	Unknown	Unknown	Unknown	Illumina HiSeq 2000	Unknown	2017-08-22	Angus	Male	Male	Stage2
SAMN05520766	PRJNA338058	Bos taurus	Caecum	Large Intestine	Large Intestine	Digestive System	Digestive System	Unknown	Unknown	Unknown	Illumina HiSeq 2000	Unknown	2017-08-22	Angus	Male	Male	Stage5
SAMN05520768	PRJNA338058	Bos taurus	Spiral Colon	Colon	Colon	Digestive System	Digestive System	Unknown	Unknown	Unknown	Illumina HiSeq 2000	Unknown	2017-08-22	Angus	Male	Male	Stage5
SAMN05520769	PRJNA338058	Bos taurus	Distal Jejunum	Jejunum	Jejunum	Digestive System	Digestive System	Unknown	Unknown	Unknown	Illumina HiSeq 2000	Unknown	2017-08-22	Angus	Male	Male	Unknown
SAMN05520771	PRJNA338058	Bos taurus	Caecum	Large Intestine	Large Intestine	Digestive System	Digestive System	Unknown	Unknown	Unknown	Illumina HiSeq 2000	Unknown	2017-08-22	Angus	Male	Male	Stage5
SAMN05520772	PRJNA338058	Bos taurus	Duodenum	Duodenum	Duodenum	Digestive System	Digestive System	Unknown	Unknown	Unknown	Illumina HiSeq 2000	Unknown	2017-08-22	Angus	Male	Male	Stage5
SAMN05520775	PRJNA338058	Bos taurus	Proximal Jejunum	Jejunum	Jejunum	Digestive System	Digestive System	Unknown	Unknown	Unknown	Illumina HiSeq 2000	Unknown	2017-08-22	Angus	Male	Male	Unknown
SAMN05520776	PRJNA338058	Bos taurus	Caecum	Large Intestine	Large Intestine	Digestive System	Digestive System	Unknown	Unknown	Unknown	Illumina HiSeq 2000	Unknown	2017-08-22	Angus	Male	Male	Stage5
SAMN05520777	PRJNA338058	Bos taurus	Duodenum	Duodenum	Duodenum	Digestive System	Digestive System	Unknown	Unknown	Unknown	Illumina HiSeq 2000	Unknown	2017-08-22	Angus	Male	Male	Stage5
SAMN05520779	PRJNA338058	Bos taurus	Spiral Colon	Colon	Colon	Digestive System	Digestive System	Unknown	Unknown	Unknown	Illumina HiSeq 2000	Unknown	2017-08-22	Simmental	Male	Male	Stage5
SAMN05520780	PRJNA338058	Bos taurus	Distal Jejunum	Jejunum	Jejunum	Digestive System	Digestive System	Unknown	Unknown	Unknown	Illumina HiSeq 2000	Unknown	2017-08-22	Simmental	Male	Male	Unknown
SAMN05520784	PRJNA338058	Bos taurus	Descending Colon	Colon	Colon	Digestive System	Digestive System	Unknown	Unknown	Unknown	Illumina HiSeq 2000	Unknown	2017-08-22	Angus	Male	Male	Stage5
SAMN05520786	PRJNA338058	Bos taurus	Distal Jejunum	Jejunum	Jejunum	Digestive System	Digestive System	Unknown	Unknown	Unknown	Illumina HiSeq 2000	Unknown	2017-08-22	Angus	Male	Male	Unknown
SAMN05520797	PRJNA338058	Bos taurus	Spiral Colon	Colon	Colon	Digestive System	Digestive System	Unknown	Unknown	Unknown	Illumina HiSeq 2000	Unknown	2017-08-22	Angus	Male	Male	Stage5
SAMN05520798	PRJNA338058	Bos taurus	Distal Jejunum	Jejunum	Jejunum	Digestive System	Digestive System	Unknown	Unknown	Unknown	Illumina HiSeq 2000	Unknown	2017-08-22	Angus	Male	Male	Stage5
SAMN05723029	PRJNA341454	Bos taurus	Nucleated Blood Cells	Blood	Blood	Immune System	Immune System	Unknown	Unknown	Unknown	Illumina HiSeq 2000	Unknown	2017-02-14	Hereford	Female	Female	Stage5
SAMN05930864	PRJNA312148	Bos taurus	Liver	Liver	Liver	Liver	Liver	Male	Hereford	Hereford	NextSeq 500	9 months	2016-02-20	Hereford	Male	Male	Stage3
SAMN05930865	PRJNA312148	Bos taurus	Liver	Liver	Liver	Liver	Liver	Male	Polish red	Polish Red	NextSeq 500	6 months	2016-02-20	Polish Red	Male	Male	Stage3
SAMN05930866	PRJNA312148	Bos taurus	Liver	Liver	Liver	Liver	Liver	Male	Hereford	Hereford	NextSeq 500	6 months	2016-02-20	Hereford	Male	Male	Unknown
SAMN05930867	PRJNA312148	Bos taurus	Liver	Liver	Liver	Liver	Liver	Male	Hereford	Hereford	NextSeq 500	1 year	2016-02-17	Hereford	Male	Male	Stage3
SAMN05930868	PRJNA312148	Bos taurus	Liver	Liver	Liver	Liver	Liver	Male	Polish Red	Polish Red	NextSeq 500	1 year	2016-02-17	Polish Red	Male	Male	Stage3
SAMN05930869	PRJNA312148	Bos taurus	Pituitary	Pituitary	Pituitary	Nervous System	Nervous System	Male	Holstein	Holstein	NextSeq 500	1 year	2016-02-17	Holstein	Male	Male	Stage3
SAMN05930870	PRJNA312148	Bos taurus	Liver	Liver	Liver	Liver	Liver	Male	Holstein	Holstein	NextSeq 500	9 months	2016-02-17	Holstein	Male	Male	Stage3
SAMN05930871	PRJNA312148	Bos taurus	Liver	Liver	Liver	Liver	Liver	Male	Holstein	Holstein	NextSeq 500	6 months	2016-02-17	Holstein	Male	Male	Stage3
SAMN05930872	PRJNA312148	Bos taurus	Pituitary	Pituitary	Pituitary	Nervous System	Nervous System	Male	Holstein	Holstein	NextSeq 500	9 months	2016-02-17	Holstein	Male	Male	Unknown
SAMN05930873	PRJNA312148	Bos taurus	Liver	Liver	Liver	Liver	Liver	Male	Hereford	Hereford	NextSeq 500	1 year	2016-02-17	Hereford	Male	Male	Stage3
SAMN05930874	PRJNA312148	Bos taurus	Liver	Liver	Liver	Liver	Liver	Male	Hereford	Hereford	NextSeq 500	9 months	2016-02-17	Hereford	Male	Male	Stage3
SAMN05930875	PRJNA312148	Bos taurus	Liver	Liver	Liver	Liver	Liver	Male	Polish Red	Polish Red	NextSeq 500	9 months	2016-02-17	Polish Red	Male	Male	Stage3
SAMN05930876	PRJNA312148	Bos taurus	Liver	Liver	Liver	Liver	Liver	Male	Hereford	Hereford	NextSeq 500	6 months	2016-02-17	Hereford	Male	Male	Stage3
SAMN05930877	PRJNA312148	Bos taurus	Liver	Liver	Liver	Liver	Liver	Male	Holstein	Holstein	NextSeq 500	9 months	2016-02-17	Holstein	Male	Male	Stage3
SAMN05930878	PRJNA312148	Bos taurus	Liver	Liver	Liver	Liver	Liver	Male	Holstein	Holstein	NextSeq 500	1 year	2016-02-17	Holstein	Male	Male	Stage3
SAMN05930879	PRJNA312148	Bos taurus	Pituitary	Pituitary	Pituitary	Nervous System	Nervous System	Male	Holstein	Holstein	NextSeq 500	9 months	2016-02-17	Holstein	Male	Male	Unknown
SAMN05930880	PRJNA312148	Bos taurus	Liver	Liver	Liver	Liver	Liver	Male	Holstein	Holstein	NextSeq 500	6 months	2016-02-17	Holstein	Male	Male	Stage3
SAMN05930881	PRJNA312148	Bos taurus	Liver	Liver	Liver	Liver	Liver	Male	Holstein	Holstein	NextSeq 500	1 year	2016-02-17	Holstein	Male	Male	Stage3
SAMN05930882	PRJNA312148	Bos taurus	Liver	Liver	Liver	Liver	Liver	Male	Polish Red	Polish Red	NextSeq 500	1 year	2016-02-17	Polish Red	Male	Male	Stage3
SAMN05930883	PRJNA312148	Bos taurus	Liver	Liver	Liver	Liver	Liver	Male	Polish Red	Polish Red	NextSeq 500	6 months	2016-02-17	Polish Red	Male	Male	Stage3
SAMN05930884	PRJNA312148	Bos taurus	Pituitary	Pituitary	Pituitary	Nervous System	Nervous System	Male	Holstein	Holstein	NextSeq 500	6 months	2016-02-17	Holstein	Male	Male	Unknown
SAMN05930885	PRJNA312148	Bos taurus	Pituitary	Pituitary	Pituitary	Nervous System	Nervous System	Male	Holstein	Holstein	NextSeq 500	6 months	2016-02-17	Holstein	Male	Male	Unknown
SAMN05930886	PRJNA312148	Bos taurus	Pituitary	Pituitary	Pituitary	Nervous System	Nervous System	Male	Holstein	Holstein	NextSeq 500	1 year	2016-02-17	Holstein	Male	Male	Unknown
SAMN05930887	PRJNA312148	Bos taurus	Pituitary	Pituitary	Pituitary	Nervous System	Nervous System	Male	Polish Red	Polish Red	NextSeq 500	6 months	2016-02-17	Polish Red	Male	Male	Unknown
SAMN05930892	PRJNA312148	Bos taurus	Pituitary	Pituitary	Pituitary	Nervous System	Nervous System	Male	Polish Red	Polish Red	NextSeq 500	6 months	2016-02-17	Polish Red	Male	Male	Unknown
SAMN05930893	PRJNA312148	Bos taurus	Pituitary	Pituitary	Pituitary	Nervous System	Nervous System	Male	Hereford	Hereford	NextSeq 500	1 year	2016-02-17	Hereford	Male	Male	Unknown
SAMN05930894	PRJNA312148	Bos taurus	Pituitary	Pituitary	Pituitary	Nervous System	Nervous System	Male	Hereford	Hereford	NextSeq 500	9 months	2016-02-17	Hereford	Male	Male	Stage3
SAMN05930895	PRJNA312148	Bos taurus	Pituitary	Pituitary	Pituitary	Nervous System	Nervous System	Male	Hereford	Hereford	NextSeq 500	1 year	2016-02-17	Hereford	Male	Male	Unknown
SAMN05930896	PRJNA312148	Bos taurus	Pituitary	Pituitary	Pituitary	Nervous System	Nervous System	Male	Hereford	Hereford	NextSeq 500	9 months	2016-02-17	Hereford	Male	Male	Stage3
SAMN05930897	PRJNA312148	Bos taurus	Pituitary	Pituitary	Pituitary	Nervous System	Nervous System	Male	Hereford	Hereford	NextSeq 500	6 months	2016-02-17	Hereford	Male	Male	Stage3
SAMN05930898	PRJNA312148	Bos taurus	Pituitary	Pituitary	Pituitary	Nervous System	Nervous System	Male	Hereford	Hereford	NextSeq 500	6 months	2016-02-16	Hereford	Male	Male	Unknown
SAMN05939213	PRJNA350513	Bos taurus	Rumen Epithelium	Rumen	Rumen	Digestive System	Digestive System	Unknown	Holstein	Holstein	Illumina HiSeq 2000	Unknown	2017-06-09	Holstein	Male	Male	Unknown
SAMN05939215	PRJNA350513	Bos taurus	Rumen Epithelium	Rumen	Rumen	Digestive System	Digestive System	Unknown	Holstein	Holstein	Illumina HiSeq 2000	Unknown	2017-06-09	Holstein	Male	Male	Stage5
SAMN05939216	PRJNA350513	Bos taurus	Rumen Epithelium	Rumen	Rumen	Digestive System	Digestive System	Unknown	Holstein	Holstein	Illumina HiSeq 2000	Unknown	2017-06-09	Holstein	Male	Male	Stage5
SAMN05939217	PRJNA350513	Bos taurus	Rumen Epithelium	Rumen	Rumen	Digestive System	Digestive System	Unknown	Holstein	Holstein	Illumina HiSeq 2000	Unknown	2017-06-09	Holstein	Male	Male	Stage5
SAMN05939218	PRJNA350513	Bos taurus	Rumen Epithelium	Rumen	Rumen	Digestive System	Digestive System	Unknown	Holstein	Holstein	Illumina HiSeq 2000	Unknown	2017-06-09	Holstein	Male	Male	Stage5
SAMN05939222	PRJNA350513	Bos taurus	Rumen Epithelium	Rumen	Rumen	Digestive System	Digestive System	Unknown	Holstein	Holstein	Illumina HiSeq 2000	Unknown	2017-06-09	Holstein	Male	Male	Stage5
SAMN05939223	PRJNA350513	Bos taurus	Rumen Epithelium	Rumen	Rumen	Digestive System	Digestive System	Unknown	Holstein	Holstein	Illumina HiSeq 2000	Unknown	2017-06-09	Holstein	Male	Male	Stage5
SAMN05939225	PRJNA350513	Bos taurus	Rumen Epithelium	Rumen	Rumen	Digestive System	Digestive System	Unknown	Holstein	Holstein	Illumina HiSeq 2000	Unknown	2017-06-09	Holstein	Male	Male	Stage5
SAMN05939226	PRJNA350513	Bos taurus	Rumen Epithelium	Rumen	Rumen	Digestive System	Digestive System	Unknown	Holstein	Holstein	Illumina HiSeq 2000	Unknown	2017-06-09	Holstein	Male	Male	Stage5
SAMN05939227	PRJNA350513	Bos taurus	Rumen Epithelium	Rumen	Rumen	Digestive System	Digestive System	Unknown	Holstein	Holstein	Illumina HiSeq 2000	Unknown	2017-06-09	Holstein	Male	Male	Unknown
SAMN05939228	PRJNA350513	Bos taurus	Rumen Epithelium	Rumen	Rumen	Digestive System	Digestive System	Unknown	Holstein	Holstein	Illumina HiSeq 2000	Unknown	2017-06-09	Holstein	Male	Male	Stage5
SAMN05939231	PRJNA350513	Bos taurus	Rumen Epithelium	Rumen	Rumen	Digestive System	Digestive System	Unknown	Holstein	Holstein	Illumina HiSeq 2000	Unknown	2017-06-09	Holstein	Male	Male	Stage5
SAMN05939232	PRJNA350513	Bos taurus	Rumen Epithelium	Rumen	Rumen	Digestive System	Digestive System	Unknown	Holstein	Holstein	Illumina HiSeq 2000	Unknown	2017-06-09	Holstein	Male	Male	Stage5
SAMN05939233	PRJNA350513	Bos taurus	Rumen Epithelium	Rumen	Rumen	Digestive System	Digestive System	Unknown	Holstein	Holstein	Illumina HiSeq 2000	Unknown	2017-06-09	Holstein	Male	Male	Stage5
SAMN05939234	PRJNA350513	Bos taurus	Rumen Epithelium	Rumen	Rumen	Digestive System	Digestive System	Unknown	Holstein	Holstein	Illumina HiSeq 2000	Unknown	2017-06-09	Holstein	Male	Male	Stage5
SAMN05939236	PRJNA350513	Bos taurus	Rumen Epithelium	Rumen	Rumen	Digestive System	Digestive System	Unknown	Holstein	Holstein	Illumina HiSeq 2000	Unknown	2017-06-09	Holstein	Male	Male	Stage5
SAMN05939237	PRJNA350513	Bos taurus	Rumen Epithelium	Rumen	Rumen	Digestive System	Digestive System	Unknown	Holstein	Holstein	Illumina HiSeq 2000	Unknown	2017-06-09	Holstein	Male	Male	Stage5
SAMN05939238	PRJNA350513	Bos taurus	Rumen Epithelium	Rumen	Rumen	Digestive System	Digestive System	Unknown	Holstein	Holstein	Illumina HiSeq 2000	Unknown	2017-06-09	Holstein	Male	Male	Stage5
SAMN05939239	PRJNA350513	Bos taurus	Rumen Epithelium	Rumen	Rumen	Digestive System	Digestive System	Unknown	Holstein	Holstein	Illumina HiSeq 2000	Unknown	2017-06-09	Holstein	Male	Male	Stage5
SAMN05939240	PRJNA350513	Bos taurus	Rumen Epithelium	Rumen	Rumen	Digestive System	Digestive System	Unknown	Holstein	Holstein	Illumina HiSeq 2000	Unknown	2017-06-09	Holstein	Male	Male	Stage5
SAMN05939241	PRJNA350513	Bos taurus	Rumen Epithelium	Rumen	Rumen	Digestive System	Digestive System	Unknown	Holstein	Holstein	Illumina HiSeq 2000	Unknown	2017-06-09	Holstein	Male	Male	Stage5
SAMN05939242	PRJNA350513	Bos taurus	Rumen Epithelium	Rumen	Rumen	Digestive System	Digestive System	Unknown	Holstein	Holstein	Illumina HiSeq 2000	Unknown	2017-06-09	Holstein	Male	Male	Stage5
SAMN05939249	PRJNA350513	Bos taurus	Rumen Epithelium	Rumen	Rumen	Digestive System	Digestive System	Unknown	Holstein	Holstein	Illumina HiSeq 2000	Unknown	2017-06-09	Holstein	Male	Male	Unknown
SAMN05939250	PRJNA350513	Bos taurus	Rumen Epithelium	Rumen	Rumen	Digestive System	Digestive System	Unknown	Holstein	Holstein	Illumina HiSeq 2000	Unknown	2017-06-09	Holstein	Male	Male	Stage5
SAMN05939252	PRJNA350513	Bos taurus	Rumen Epithelium	Rumen	Rumen	Digestive System	Digestive System	Unknown	Holstein	Holstein	Illumina HiSeq 2000	Unknown	2017-06-09	Holstein	Male	Male	Stage5
SAMN05939253	PRJNA350513	Bos taurus	Rumen Epithelium	Rumen	Rumen	Digestive System	Digestive System	Unknown	Holstein	Holstein	Illumina HiSeq 2000	Unknown	2017-06-09	Holstein	Male	Male	Unknown
SAMN05939254	PRJNA350513	Bos taurus	Rumen Epithelium	Rumen	Rumen	Digestive System	Digestive System	Unknown	Holstein	Holstein	Illumina HiSeq 2000	Unknown	2017-06-09	Holstein	Male	Male	Stage5
SAMN05939255	PRJNA350513	Bos taurus	Rumen Epithelium	Rumen	Rumen	Digestive System	Digestive System	Unknown	Holstein	Holstein	Illumina HiSeq 2000	Unknown	2017-06-09	Holstein	Male	Male	Stage5
SAMN05939256	PRJNA350513	Bos taurus	Rumen Epithelium	Rumen	Rumen	Digestive System	Digestive System	Unknown	Holstein	Holstein	Illumina HiSeq 2000	Unknown	2017-06-09	Holstein	Male	Male	Stage5
SAMN06018352	PRJNA353633	Bos taurus	Rumen Papillae	Rumen	Rumen	Digestive System	Digestive System	Unknown	Unknown	Unknown	Illumina HiSeq 2000	Unknown	2018-02-14	Kinsella Composite	Female	Female	Stage5
SAMN06018354	PRJNA353633	Bos taurus	Rumen Papillae	Rumen	Rumen	Digestive System	Digestive System	Unknown	Unknown	Unknown	Illumina HiSeq 2000	Unknown	2018-02-14	Kinsella Composite	Female	Female	Stage5
SAMN06018356	PRJNA353633	Bos taurus	Rumen Papillae	Rumen	Rumen	Digestive System	Digestive System	Unknown	Unknown	Unknown	Illumina HiSeq 2000	Unknown	2018-02-14	Angus	Female	Female	Stage5
SAMN06018360	PRJNA353633	Bos taurus	Rumen Papillae	Rumen	Rumen	Digestive System	Digestive System	Unknown	Unknown	Unknown	Illumina HiSeq 2000	Unknown	2018-02-14	Kinsella Composite	Female	Female	Unknown
SAMN06018361	PRJNA353633	Bos taurus	Rumen Papillae	Rumen	Rumen	Digestive System	Digestive System	Unknown	Unknown	Unknown	Illumina HiSeq 2000	Unknown	2018-02-14	Charolais	Female	Female	Stage5
SAMN06018362	PRJNA353633	Bos taurus	Rumen Papillae	Rumen	Rumen	Digestive System	Digestive System	Unknown	Unknown	Unknown	Illumina HiSeq 2000	Unknown	2018-02-14	Kinsella Composite	Female	Female	Stage5
SAMN06018368	PRJNA353633	Bos taurus	Rumen Papillae	Rumen	Rumen	Digestive System	Digestive System	Unknown	Unknown	Unknown	Illumina HiSeq 2000	Unknown	2018-02-14	Angus	Female	Female	Stage5
SAMN06018369	PRJNA353633	Bos taurus	Rumen Papillae	Rumen	Rumen	Digestive System	Digestive System	Unknown	Unknown	Unknown	Illumina HiSeq 2000	Unknown	2018-02-14	Kinsella Composite	Female	Female	Stage5
SAMN06018375	PRJNA353633	Bos taurus	Rumen Papillae	Rumen	Rumen	Digestive System	Digestive System	Unknown	Unknown	Unknown	Illumina HiSeq 2000	Unknown	2018-02-14	Kinsella Composite	Female	Female	Unknown
SAMN06018376	PRJNA353633	Bos taurus	Rumen Papillae	Rumen	Rumen	Digestive System	Digestive System	Unknown	Unknown	Unknown	Illumina HiSeq 2000	Unknown	2018-02-14	Kinsella Composite	Female	Female	Stage5
SAMN06018381	PRJNA353633	Bos taurus	Rumen Papillae	Rumen	Rumen	Digestive System	Digestive System	Unknown	Unknown	Unknown	Illumina HiSeq 2000	Unknown	2018-02-14	Kinsella Composite	Female	Female	Stage5
SAMN06018382	PRJNA353633	Bos taurus	Rumen Papillae	Rumen	Rumen	Digestive System	Digestive System	Unknown	Unknown	Unknown	Illumina HiSeq 2000	Unknown	2018-02-14	Kinsella Composite	Female	Female	Stage5
SAMN06018387	PRJNA353633	Bos taurus	Rumen Papillae	Rumen	Rumen	Digestive System	Digestive System	Unknown	Unknown	Unknown	Illumina HiSeq 2000	Unknown	2018-02-14	Kinsella Composite	Female	Female	Stage5
SAMN06018389	PRJNA353633	Bos taurus	Rumen Papillae	Rumen	Rumen	Digestive System	Digestive System	Unknown	Unknown	Unknown	Illumina HiSeq 2000	Unknown	2018-02-14	Kinsella Composite	Female	Female	Stage5
SAMN06018391	PRJNA353633	Bos taurus	Rumen Papillae	Rumen	Rumen	Digestive System	Digestive System	Unknown	Unknown	Unknown	Illumina HiSeq 2000	Unknown	2018-02-14	Kinsella Composite	Female	Female	Stage5
SAMN06018394	PRJNA353633	Bos taurus	Rumen Papillae	Rumen	Rumen	Digestive System	Digestive System	Unknown	Unknown	Unknown	Illumina HiSeq 2000	Unknown	2018-02-14	Kinsella Composite	Female	Female	Stage5
SAMN06141697	PRJNA357463	Bos taurus	Liver	Liver	Liver	Liver	Liver	Unknown	Holstein	Holstein	Illumina HiSeq 2500	Unknown	2017-03-09	Holstein	Female	Female	Stage5
SAMN06141699	PRJNA357463	Bos taurus	Liver	Liver	Liver	Liver	Liver	Unknown	Jersey	Jersey	Illumina HiSeq 2500	Unknown	2017-03-09	Jersey	Female	Female	Stage5
SAMN06141700	PRJNA357463	Bos taurus	Liver	Liver	Liver	Liver	Liver	Unknown	Jersey	Jersey	Illumina HiSeq 2500	Unknown	2017-03-09	Jersey	Female	Female	Stage5
SAMN06141701	PRJNA357463	Bos taurus	Liver	Liver	Liver	Liver	Liver	Unknown	Jersey	Jersey	Illumina HiSeq 2500	Unknown	2017-03-09	Jersey	Female	Female	Stage5
SAMN06141703	PRJNA357463	Bos taurus	Liver	Liver	Liver	Liver	Liver	Unknown	Holstein	Holstein	Illumina HiSeq 2500	Unknown	2017-03-09	Holstein	Female	Female	Stage5
SAMN06141706	PRJNA357463	Bos taurus	Liver	Liver	Liver	Liver	Liver	Unknown	Jersey	Jersey	Illumina HiSeq 2500	Unknown	2017-03-09	Jersey	Female	Female	Stage5
SAMN06141707	PRJNA357463	Bos taurus	Liver	Liver	Liver	Liver	Liver	Unknown	Jersey	Jersey	Illumina HiSeq 2500	Unknown	2017-03-09	Jersey	Female	Female	Stage5
SAMN06141709	PRJNA357463	Bos taurus	Liver	Liver	Liver	Liver	Liver	Unknown	Jersey	Jersey	Illumina HiSeq 2500	Unknown	2017-03-09	Jersey	Female	Female	Stage5
SAMN06141710	PRJNA357463	Bos taurus	Liver	Liver	Liver	Liver	Liver	Unknown	Jersey	Jersey	Illumina HiSeq 2500	Unknown	2017-03-09	Jersey	Female	Female	Stage5
SAMN06141712	PRJNA357463	Bos taurus	Liver	Liver	Liver	Liver	Liver	Unknown	Holstein	Holstein	Illumina HiSeq 2500	Unknown	2017-03-09	Holstein	Female	Female	Stage5
SAMN06141716	PRJNA357463	Bos taurus	Liver	Liver	Liver	Liver	Liver	Unknown	Holstein	Holstein	Illumina HiSeq 2500	Unknown	2017-03-09	Holstein	Female	Female	Stage5
SAMN06141719	PRJNA357463	Bos taurus	Liver	Liver	Liver	Liver	Liver	Unknown	Jersey	Jersey	Illumina HiSeq 2500	Unknown	2017-03-09	Jersey	Female	Female	Stage5
SAMN06141721	PRJNA357463	Bos taurus	Liver	Liver	Liver	Liver	Liver	Unknown	Jersey	Jersey	Illumina HiSeq 2500	Unknown	2017-03-09	Jersey	Female	Female	Stage5
SAMN06141723	PRJNA357463	Bos taurus	Liver	Liver	Liver	Liver	Liver	Unknown	Holstein	Holstein	Illumina HiSeq 2500	Unknown	2017-03-09	Holstein	Female	Female	Unknown
SAMN06141725	PRJNA357463	Bos taurus	Liver	Liver	Liver	Liver	Liver	Unknown	Holstein	Holstein	Illumina HiSeq 2500	Unknown	2017-03-09	Holstein	Female	Female	Stage5
SAMN06141727	PRJNA357463	Bos taurus	Liver	Liver	Liver	Liver	Liver	Unknown	Jersey	Jersey	Illumina HiSeq 2500	Unknown	2017-03-09	Jersey	Female	Female	Stage5
SAMN06141728	PRJNA357463	Bos taurus	Liver	Liver	Liver	Liver	Liver	Unknown	Jersey	Jersey	Illumina HiSeq 2500	Unknown	2017-03-09	Jersey	Female	Female	Stage5
SAMN06141731	PRJNA357463	Bos taurus	Liver	Liver	Liver	Liver	Liver	Unknown	Holstein	Holstein	Illumina HiSeq 2500	Unknown	2017-03-09	Holstein	Female	Female	Stage5
SAMN06141732	PRJNA357463	Bos taurus	Liver	Liver	Liver	Liver	Liver	Unknown	Holstein	Holstein	Illumina HiSeq 2500	Unknown	2017-03-09	Holstein	Female	Female	Stage5
SAMN06162229	PRJNA200354	Bos taurus	Lung	Lung	Lung	Respiratory System	Respiratory System	Male	Cattle	Yak	Illumina HiSeq 2500	3-5 years	2017-12-18	Yak	Male	Male	Stage5
SAMN06242647	PRJNA362606	Bos taurus	Spleen	Spleen	Spleen	Immune System	Immune System	Unknown	Unknown	Unknown	Illumina HiSeq 2500	>4 years	2017-09-06	Yak	Female	Female	Stage5
SAMN06242717	PRJNA362606	Bos taurus	Lung	Lung	Lung	Respiratory System	Respiratory System	Unknown	Unknown	Unknown	Illumina HiSeq 2000	>4 years	2017-09-06	Xuzhou	Male	Male	Stage5
SAMN06242719	PRJNA362606	Bos taurus	Lung	Lung	Lung	Respiratory System	Respiratory System	Unknown	Unknown	Unknown	Illumina HiSeq 2000	>4 years	2017-09-06	Xuzhou	Female	Female	Stage5
SAMN06242727	PRJNA362606	Bos taurus	Spleen	Spleen	Spleen	Immune System	Immune System	Unknown	Unknown	Unknown	Illumina HiSeq 2500	>4 years	2017-09-06	Xuzhou	Female	Female	Stage5
SAMN06252039	PRJNA363038	Bos taurus	Jejunal Epithelium	Jejunum	Jejunum	Digestive System	Digestive System	Unknown	Holstein	Holstein	Illumina HiSeq 2000	Unknown	2018-03-30	Holstein	Male	Male	Stage3
SAMN06252041	PRJNA363038	Bos taurus	Jejunal Epithelium	Jejunum	Jejunum	Digestive System	Digestive System	Unknown	Holstein	Holstein	Illumina HiSeq 2000	Unknown	2018-03-30	Holstein	Male	Male	Stage3
SAMN06252043	PRJNA363038	Bos taurus	Jejunal Epithelium	Jejunum	Jejunum	Digestive System	Digestive System	Unknown	Holstein	Holstein	Illumina HiSeq 2000	Unknown	2018-03-30	Holstein	Male	Male	Stage3
SAMN06252045	PRJNA363038	Bos taurus	Jejunal Epithelium	Jejunum	Jejunum	Digestive System	Digestive System	Unknown	Holstein	Holstein	Illumina HiSeq 2000	Unknown	2018-03-30	Holstein	Male	Male	Unknown
SAMN06252046	PRJNA363038	Bos taurus	Jejunal Epithelium	Jejunum	Jejunum	Digestive System	Digestive System	Unknown	Holstein	Holstein	Illumina HiSeq 2000	Unknown	2018-03-30	Holstein	Male	Male	Unknown
SAMN06252049	PRJNA363038	Bos taurus	Jejunal Epithelium	Jejunum	Jejunum	Digestive System	Digestive System	Unknown	Holstein	Holstein	Illumina HiSeq 2000	Unknown	2018-03-30	Holstein	Male	Male	Stage4
SAMN06252051	PRJNA363038	Bos taurus	Jejunal Epithelium	Jejunum	Jejunum	Digestive System	Digestive System	Unknown	Holstein	Holstein	Illumina HiSeq 2000	Unknown	2018-03-30	Holstein	Male	Male	Stage3
SAMN06252053	PRJNA363038	Bos taurus	Jejunal Epithelium	Jejunum	Jejunum	Digestive System	Digestive System	Unknown	Holstein	Holstein	Illumina HiSeq 2000	Unknown	2018-03-30	Holstein	Male	Male	Unknown
SAMN06252054	PRJNA363038	Bos taurus	Jejunal Epithelium	Jejunum	Jejunum	Digestive System	Digestive System	Unknown	Holstein	Holstein	Illumina HiSeq 2000	Unknown	2018-03-30	Holstein	Male	Male	Stage3
SAMN06252057	PRJNA363038	Bos taurus	Jejunal Epithelium	Jejunum	Jejunum	Digestive System	Digestive System	Unknown	Holstein	Holstein	Illumina HiSeq 2000	Unknown	2018-03-30	Holstein	Male	Male	Unknown
SAMN06252059	PRJNA363038	Bos taurus	Jejunal Epithelium	Jejunum	Jejunum	Digestive System	Digestive System	Unknown	Holstein	Holstein	Illumina HiSeq 2000	Unknown	2018-03-30	Holstein	Male	Male	Stage3
SAMN06252060	PRJNA363038	Bos taurus	Jejunal Epithelium	Jejunum	Jejunum	Digestive System	Digestive System	Unknown	Holstein	Holstein	Illumina HiSeq 2000	Unknown	2018-03-30	Holstein	Male	Male	Stage3
SAMN06252061	PRJNA363038	Bos taurus	Jejunal Epithelium	Jejunum	Jejunum	Digestive System	Digestive System	Unknown	Holstein	Holstein	Illumina HiSeq 2000	Unknown	2018-03-30	Holstein	Male	Male	Stage3
SAMN06252063	PRJNA363038	Bos taurus	Jejunal Epithelium	Jejunum	Jejunum	Digestive System	Digestive System	Unknown	Holstein	Holstein	Illumina HiSeq 2000	Unknown	2018-03-30	Holstein	Male	Male	Stage3
SAMN06252064	PRJNA363038	Bos taurus	Jejunal Epithelium	Jejunum	Jejunum	Digestive System	Digestive System	Unknown	Holstein	Holstein	Illumina HiSeq 2000	Unknown	2018-03-30	Holstein	Male	Male	Unknown
SAMN06252065	PRJNA363038	Bos taurus	Jejunal Epithelium	Jejunum	Jejunum	Digestive System	Digestive System	Unknown	Holstein	Holstein	Illumina HiSeq 2000	Unknown	2018-03-30	Holstein	Male	Male	Stage3
SAMN06252066	PRJNA363038	Bos taurus	Jejunal Epithelium	Jejunum	Jejunum	Digestive System	Digestive System	Unknown	Holstein	Holstein	Illumina HiSeq 2000	Unknown	2018-03-30	Holstein	Male	Male	Stage3
SAMN06252067	PRJNA363038	Bos taurus	Jejunal Epithelium	Jejunum	Jejunum	Digestive System	Digestive System	Unknown	Holstein	Holstein	Illumina HiSeq 2000	Unknown	2018-03-30	Holstein	Male	Male	Unknown
SAMN06252069	PRJNA363038	Bos taurus	Jejunal Epithelium	Jejunum	Jejunum	Digestive System	Digestive System	Unknown	Holstein	Holstein	Illumina HiSeq 2000	Unknown	2018-03-30	Holstein	Male	Male	Stage3
SAMN06252072	PRJNA363038	Bos taurus	Jejunal Epithelium	Jejunum	Jejunum	Digestive System	Digestive System	Unknown	Holstein	Holstein	Illumina HiSeq 2000	Unknown	2018-03-30	Holstein	Male	Male	Unknown
SAMN06252073	PRJNA363038	Bos taurus	Jejunal Epithelium	Jejunum	Jejunum	Digestive System	Digestive System	Unknown	Holstein	Holstein	Illumina HiSeq 2000	Unknown	2018-03-30	Holstein	Male	Male	Stage3
SAMN06252076	PRJNA363038	Bos taurus	Jejunal Epithelium	Jejunum	Jejunum	Digestive System	Digestive System	Unknown	Holstein	Holstein	Illumina HiSeq 2000	Unknown	2018-03-30	Holstein	Male	Male	Unknown
SAMN06252077	PRJNA363038	Bos taurus	Jejunal Epithelium	Jejunum	Jejunum	Digestive System	Digestive System	Unknown	Holstein	Holstein	Illumina HiSeq 2000	Unknown	2018-03-30	Holstein	Male	Male	Unknown
[truncated: 6,366 more rows]

## Sheet: Supplementary Table 2
Table S2. Summary of single cell RNA-Seq samples collected from the CattleCA project.
Project_id	SRA_id	Library_id	Tissue_name	Library construction
PRJNA1119173	SRR29274847	Blood	Blood	10x Genomics
PRJNA1119173	SRR29289099	Cerebellum1	CNS	10x Genomics
PRJNA1119173	SRR29280109	Cerebellum2	CNS	10x Genomics
PRJNA1119173	SRR29280108	Cerebral cortex1	CNS	10x Genomics
PRJNA1119173	SRR29280107	Cerebral cortex2	CNS	10x Genomics
PRJNA1119173	SRR29280106	Cervical lymph node1	Lymph node	10x Genomics
PRJNA1119173	SRR29274836	Cervical lymph node2	Lymph node	10x Genomics
PRJNA1119173	SRR29280129	Colon1	Colon	10x Genomics
PRJNA1119173	SRR29274833	Colon2	Colon	10x Genomics
PRJNA1119173	SRR29274844	Duodenum1	Duodenum	10x Genomics
PRJNA1119173	SRR29289096	Duodenum2	Duodenum	10x Genomics
PRJNA1119173	SRR29289095	Heart1	Heart	10x Genomics
PRJNA1119173	SRR29289092	Heart2	Heart	10x Genomics
PRJNA1119173	SRR29280128	Hypothalamus1	Hypothalamus	10x Genomics
PRJNA1119173	SRR29280127	Hypothalamus2	Hypothalamus	10x Genomics
PRJNA1119173	SRR29274834	Ileum1	Ileum	10x Genomics
PRJNA1119173	SRR29280119	Ileum2	Ileum	10x Genomics
PRJNA1119173	SRR29274843	Intima of corpus uteri1	Uterus	10x Genomics
PRJNA1119173	SRR29280124	Intima of corpus uteri2	Uterus	10x Genomics
PRJNA1119173	SRR29274831	Intima of uterine horn1	Uterus	10x Genomics
PRJNA1119173	SRR29274842	Intima of uterine horn2	Uterus	10x Genomics
PRJNA1119173	SRR29274830	Jejunum1	Jejunum	10x Genomics
PRJNA1119173	SRR29274832	Jejunum2	Jejunum	10x Genomics
PRJNA1119173	SRR29274848	Liver1	Liver	10x Genomics
PRJNA1119173	SRR29274841	Liver2	Liver	10x Genomics
PRJNA1119173	SRR29280120	Liver3	Liver	10x Genomics
PRJNA1119173	SRR29280102	Liver4	Liver	10x Genomics
PRJNA1119173	SRR29280125	Lung1	Lung	10x Genomics
PRJNA1119173	SRR29280101	Lung2	Lung	10x Genomics
PRJNA1119173	SRR29274827	Mammary duct1	Mammary Gland	10x Genomics
PRJNA1119173	SRR29280126	Mammary duct2	Mammary Gland	10x Genomics
PRJNA1119173	SRR29280100	Mammary parenchyma1	Mammary Gland	10x Genomics
PRJNA1119173	SRR29280122	Mammary parenchyma2	Mammary Gland	10x Genomics
PRJNA1119173	SRR29274837	Oviduct1	Oviduct	10x Genomics
PRJNA1119173	SRR29274838	Oviduct2	Oviduct	10x Genomics
PRJNA1119173	SRR29274849	Pituitary gland1	Pituitary gland	10x Genomics
PRJNA1119173	SRR29280105	Pituitary gland2	Pituitary gland	10x Genomics
PRJNA1119173	SRR29280116	Rumen Muscle1	Rumen	10x Genomics
PRJNA1119173	SRR29289105	Rumen Muscle2	Rumen	10x Genomics
PRJNA1119173	SRR29274835	Rumen Papillary1	Rumen	10x Genomics
PRJNA1119173	SRR29280115	Rumen Papillary2	Rumen	10x Genomics
PRJNA1119173	SRR29274845	Skin1	Skin	10x Genomics
PRJNA1119173	SRR29289090	Skin2	Skin	10x Genomics
PRJNA1119173	SRR29274829	Spleen1	Spleen	10x Genomics
PRJNA1119173	SRR29289091	Spleen2	Spleen	10x Genomics
PRJNA1112075	SRR30130670	cattle_Testis	Testis	MGI DNBelab C4
PRJNA1112075	SRR30130671	cattle_Spleen	Spleen	MGI DNBelab C4
PRJNA1112075	SRR30130672	cattle_Skin	Skin	MGI DNBelab C4
PRJNA1112075	SRR31299364	cattle_Epididymis	Epididymis	MGI DNBelab C4

## Sheet: Supplementary Table 3
Table S3. Estimated cell-type fraction across 22 tissues.
Tissue	Celltype	Average_fraction
Blood	Bcells	0.281501
Blood	Classicalmonocytes	0.0709128
Blood	Neutrophils	0.0353297
Blood	CytotoxicCD8Tcells	0.0236722
Blood	CD4Tcells	0.31545
Blood	WC1Tcells	0.0795129
Blood	NKcells	0.0289372
Blood	Intermediatemonocytes	0.0348082
Blood	Erythroidcells	0.0920109
Blood	Circulatingepithelialcells	0.0378649
CNS	Excitatoryneurons	0.00758392
CNS	Oligodendrocytes	0.0961966
CNS	GABAergicneurons	4.77262e-05
CNS	Endothelialcells	0.364652
CNS	Astrocytes	0.0812315
CNS	VIPGABAergicneurons	0.118021
CNS	SSTGABAergicneurons	0.110125
CNS	Microglia	0.00568095
CNS	Granulecells	0.00691915
CNS	Purkinjecells	0.000140534
CNS	Tcells	0.00586432
CNS	Bloodvascularendothelialcells	0.0110983
CNS	Neutrophils	0.00320834
CNS	Smoothmusclecells	0.0142463
CNS	Fibroblasts	0.0835564
CNS	Plasmacells	0.0336067
CNS	Mastcells	0.0578214
Colon	CytotoxicCD8Tcells	0.00351692
Colon	CD4Tcells	0.00277873
Colon	NKTcells	0.0038519
Colon	Otherimmunecells	0.218488
Colon	Plasmacells	0.0104603
Colon	Conventionaldendriticcellstype1	0.00856804
Colon	Bcells	0.00805418
Colon	Tcells	0.00160614
Colon	Neutrophils	0.00245843
Colon	Mastcells	0.00254801
Colon	Macrophages	0.0362724
Colon	Gobletcells	0.415039
Colon	Myofibroblasts	0.233577
Colon	Bloodvascularendothelialcells	0.0527806
Duodenum	ProgenitorcellsTransitamplifyingcells	0.0276222
Duodenum	Enterocytes	0.127549
Duodenum	Plasmacells	0.0201753
Duodenum	Gobletcells	0.186674
Duodenum	Fibroblasts	0.0607034
Duodenum	CytotoxicCD8Tcells	0.00227637
Duodenum	CD4Tcells	0.0821015
Duodenum	Conventionaldendriticcellstype1	0.0210199
Duodenum	NKTcells	0.000667931
Duodenum	Myofibroblasts	0.0329369
Duodenum	Bloodvascularendothelialcells	0.0960015
Duodenum	Mastcells	0.0475606
Duodenum	Macrophages	0.0429835
Duodenum	Smoothmusclecells	0.174188
Duodenum	Bcells	0.0335671
Duodenum	Lymphaticendothelialcells	0.0439727
Epididymis	Conventionaldendriticcellstype1	0.0307752
Epididymis	Principalcells	0.538764
Epididymis	WC1Tcells	0.00250474
Epididymis	Macrophages	0.0218855
Epididymis	Ciliatedcells	0.00830249
Epididymis	Fibroblasts	0.349258
Epididymis	Endothelialcells	0.0411732
Epididymis	CD4Tcells	0.000834838
Epididymis	CytotoxicCD8Tcells	0.0065021
Heart	Bloodvascularendothelialcells	0.366747
Heart	Mastcells	0.00059012
Heart	CD8Tcells	0.00327606
Heart	Lymphaticendothelialcells	0.000175945
Heart	Fibroblasts	0.208652
Heart	WC1Tcells	6.39158e-05
Heart	Macrophages	0.0295036
Heart	Neutrophils	0.00443855
Heart	Cardiomyocytes	0.268429
Heart	Schwanncells	0.00303273
Heart	CD4Tcells	0.000128172
Heart	Pericytes	0.0744502
Heart	Conventionaldendriticcellstype1	0.00449616
Heart	Nonclassicalmonocytes	0.000659256
Heart	Smoothmusclecells	0.0340869
Heart	Proliferativecells	0.00127069
Hypothalamus	Microglia	0.18766
Hypothalamus	Oligodendrocytes	0.311873
Hypothalamus	Excitatoryneurons	0.149948
Hypothalamus	Oligodendrocyteprecursorcells	0.125846
Hypothalamus	Astrocytes	0.109104
Hypothalamus	Tcells	0.204461
Ileum	CytotoxicCD8Tcells	0.0173471
Ileum	CD4Tcells	0.00482719
Ileum	Immunecells	0.129665
Ileum	Macrophages	0.0305198
Ileum	Conventionaldendriticcellstype1	0.00225257
Ileum	Bloodvascularendothelialcells	0.00614748
Ileum	Intestinalstemcells	0.00955404
Ileum	Myofibroblasts	0.0698388
Ileum	Gobletcells	0.0143489
Ileum	Bcells	0.382246
Ileum	Schwanncells	0.0054154
Ileum	Mastcells	0.00302342
Ileum	Lymphaticendothelialcells	0.0265712
Ileum	Smoothmusclecells	0.0507917
Ileum	Migratorydendriticcells	0.0391706
Ileum	Plasmacells	0.00330058
Ileum	Fibroblasts	0.0798966
Ileum	Enterocytes	0.117215
Ileum	Neutrophils	0.00312775
Ileum	Conventionaldendriticcellstype2	0.00474167
Jejunum	CytotoxicCD8Tcells	0.00204064
Jejunum	Bcells	0.0324481
Jejunum	CD4Tcells	0.000285841
Jejunum	Plasmacells	0.0145496
Jejunum	Mastcells	0.0095499
Jejunum	Conventionaldendriticcellstype2	0.00280853
Jejunum	Bloodvascularendothelialcells	0.0185441
Jejunum	Macrophages	0.0110157
Jejunum	Migratorydendriticcells	0.0288217
Jejunum	Lymphaticendothelialcells	0.00979694
Jejunum	Enterocytes	0.489867
Jejunum	Conventionaldendriticcellstype1	0.00766581
Jejunum	Gobletcells	0.0422919
Jejunum	Schwanncells	0.00712607
Jejunum	ProliferativeTcells	0.0292827
Jejunum	Fibroblasts	0.104905
Jejunum	Myofibroblasts	0.0876904
Jejunum	NKTcells	0.0910577
Jejunum	ProgenitorcellsTransitamplifyingcells	0.0102521
LargeIntestine	CytotoxicCD8Tcells	0.00109425
LargeIntestine	NKTcells	0.00595166
LargeIntestine	Bcells	0.0184144
LargeIntestine	CD4Tcells	0.00394394
LargeIntestine	Plasmacells	0.0195584
LargeIntestine	Migratorydendriticcells	0.000903028
LargeIntestine	Mastcells	0.00748798
LargeIntestine	Gobletcells	0.38699
LargeIntestine	Neutrophils	0.0102324
LargeIntestine	Macrophages	0.0351684
LargeIntestine	ProliferativeTcells	0.0243199
LargeIntestine	Conventionaldendriticcellstype1	0.0152267
LargeIntestine	Tcells	0.00747976
LargeIntestine	Smoothmusclecells	0.0416144
LargeIntestine	Lymphaticendothelialcells	0.00795377
LargeIntestine	Myofibroblasts	0.180119
LargeIntestine	Otherimmunecells	0.0601175
LargeIntestine	Bloodvascularendothelialcells	0.0351479
LargeIntestine	Enterocytes	0.123779
LargeIntestine	Schwanncells	0.0093558
LargeIntestine	Fibroblasts	0.00514151
Liver	Hepatocytes	0.968424
Liver	Plasmacells	0.00156544
Liver	Tcells	0.00050247
Liver	Neutrophils	0.00037349
Liver	Kupffercells	0.00176773
Liver	Liversinusoidalendothelialcells	0.00031754
Liver	NKTcells	3.32873e-05
Liver	Bcells	0.000152563
Liver	Dendriticcells	0.00300414
Liver	Proliferativedendriticcells	0.00355904
Liver	Bloodvascularendothelialcells	0.000285107
Liver	Cholangiocytes	0.00882244
Liver	Myofibroblasts	0.0111927
Lung	CytotoxicCD8Tcells	0.000490251
Lung	Neutrophils	0.00426472
Lung	CD4Tcells	9.87301e-05
Lung	Macrophages	0.0744351
Lung	Lymphaticendothelialcells	0.0216914
Lung	Bloodvascularendothelialcells	0.295057
Lung	Bcells	0.00124302
Lung	Mastcells	0.00608827
Lung	NKcells	0.00169378
Lung	Clubcells	0.00481344
Lung	WC1Tcells	7.71336e-05
Lung	Alveolarepithelialtype2cells	0.0889841
Lung	Alveolarepithelialtype1cells	0.302438
Lung	CD8Tcells	0.00345703
Lung	Fibroblasts	0.171088
Lung	Proliferativecells	0.00550934
Lung	Ciliatedcells	0.0172488
Lung	Plasmacells	0.00132176
LymphNode	Smoothmusclecells	0.0314266
LymphNode	StromalcellsatcapsuleadventitiaadvSCs	0.000328789
LymphNode	Bloodvascularendothelialcells	0.0202804
LymphNode	Tcells	0.394746
LymphNode	C7stromalcellsC7SCs	0.0808541
LymphNode	Neutrophils	0.00506344
LymphNode	Mastcells	0.000961748
LymphNode	Schwanncells	0.00548999
LymphNode	Macrophages	0.0409957
LymphNode	Lymphaticendothelialcells	0.0863444
LymphNode	Bcells	0.333509
MammaryGland	Bloodvascularendothelialcells	0.0318426
MammaryGland	NKcells	0.00108566
MammaryGland	Smoothmusclecells	0.0337858
MammaryGland	Neutrophils	0.112247
MammaryGland	Macrophages	0.105119
MammaryGland	NKTcells	9.02719e-05
MammaryGland	CD4Tcells	0.00409585
MammaryGland	Luminalcells	0.505042
MammaryGland	CytotoxicCD8Tcells	0.00788145
MammaryGland	WC1Tcells	0.00204611
MammaryGland	Mastcells	0.00383246
MammaryGland	Fibroblasts	0.0915758
MammaryGland	Tcells	0.00949504
MammaryGland	Lymphaticendothelialcells	0.00903974
MammaryGland	Plasmacells	0.012134
MammaryGland	Conventionaldendriticcellstype1	0.0103891
MammaryGland	Immunecells	0.0602979
Oviduct	Fibroblasts	0.267006
Oviduct	Macrophages	0.0383301
Oviduct	Tcells	0.147412
Oviduct	Bloodvascularendothelialcells	0.153166
Oviduct	Lymphaticendothelialcells	0.120189
Oviduct	Smoothmusclecells	0.222075
Oviduct	Mastcells	0.0518221
PituitaryGland	Microglia	0.00114386
PituitaryGland	Bloodvascularendothelialcells	0.0230766
PituitaryGland	Smoothmusclecells	0.0254472
PituitaryGland	Oligodendrocytes	0.00936306
PituitaryGland	Tcells	0.00220952
PituitaryGland	Neutrophils	0.00481608
PituitaryGland	Fibroblasts	0.230111
PituitaryGland	Astrocytes	0.193901
PituitaryGland	Plasmacells	0.0450052
PituitaryGland	Mastcells	0.0448503
PituitaryGland	GABAergicneurons	0.420076
Placenta	Macrophages	0.0595415
Placenta	Uninucleatetrophoblastcells	0.214854
Placenta	Binucleatetrophoblastcells	0.447705
Placenta	Mesenchymalstemcells	0.162868
Placenta	Fibroblasts	0.0610594
Placenta	Tcells	0.0124234
Placenta	Proliferativeuninucleatetrophoblastcells	0.0207066
Placenta	Neutrophils	0.0208425
Rumen	Fibroblasts	0.0176101
Rumen	Bloodvascularendothelialcells	0.0078803
Rumen	NKTcells	0.000675978
Rumen	Keratinocytes	0.000845861
Rumen	CD4Tcells	0.000346897
Rumen	Smoothmusclecells	0.465361
Rumen	Lymphaticendothelialcells	0.00205601
Rumen	Macrophages	0.00494431
Rumen	Spinouscells	0.496072
Rumen	Epithelialstemcells	5.92759e-05
Rumen	Proliferativebasalcells	0.00414725
Skin	Spinouscells	0.0704003
Skin	Fibroblasts	0.138935
Skin	Basalcells	0.00878968
Skin	Bloodvascularendothelialcells	0.030354
Skin	Smoothmusclecells	0.0607889
Skin	Follicularcells	0.0750719
Skin	Lymphaticendothelialcells	0.0114
Skin	Luminalcells	0.02742
Skin	Granularcells	0.291802
Skin	Proliferativespinouscells	0.0102199
Skin	Macrophages	0.0353274
Skin	Mastcells	0.00405709
Skin	Sebocytes	0.218343
Skin	WC1Tcells	0.017091
Spleen	Macrophages	0.347986
Spleen	Neutrophils	0.0112347
Spleen	Plasmacells	0.0461174
Spleen	Bcells	0.0867322
Spleen	NKTcells	0.0633863
Spleen	WC1Tcells	0.0357499
Spleen	CD4Tcells	0.0316298
Spleen	Bloodvascularendothelialcells	0.120531
Spleen	NKcells	0.0251406
Spleen	Conventionaldendriticcellstype1	0.0331576
Spleen	Mastcells	0.00537748
Spleen	Intermediatemonocytes	0.0186751
Spleen	Immunecells	0.174282
Testis	Spermatids	0.24158
Testis	NKTcells	0.00279914
Testis	Fibroblasts	0.203563
Testis	Differentiatingspermatogonia	0.0405413
Testis	Spermatocytes	0.1596
Testis	Plasmacells	0.00015648
Testis	Macrophages	0.00849167
Testis	Lymphaticendothelialcells	0.0200543
Testis	Undifferentiatedspermatogonia	0.0881329
Testis	Bloodvascularendothelialcells	0.0816006
Testis	CytotoxicCD8Tcells	0.000696389
Testis	Bcells	0.0194106
Testis	Smoothmusclecells	0.132675
Testis	Epithelialcells	0.000698416
Uterus	Bloodvascularendothelialcells	0.0488826
Uterus	Epithelialcells	0.303558
Uterus	Stromalcells	0.358723
Uterus	Smoothmusclecells	0.024635
Uterus	Fibroblasts	0.0166211
Uterus	Mastcells	0.00531506
Uterus	NKTcells	0.0214694
Uterus	Ciliatedcells	0.158696
Uterus	Gliacells	0.000903598
Uterus	Macrophages	0.0221247
Uterus	Lymphaticendothelialcells	0.0202427
Uterus	Neutrophils	0.0188279

## Sheet: Supplementary Table 4
Table S4. Information of 168 cell-type faction QTL.
chrom	position	alt	ref	beta	se	pval	MAF	N	Tissue	Celltype
8	75860946	C	A	0.0236751	0.00376973	4.6354e-10	0.3954	1515	Blood	CD4Tcells
11	74268373	G	A	0.011205	0.00199666	2.45622e-08	0.07294	1515	Blood	Circulatingepithelialcells
23	42415731	C	T	0.0120889	0.00216021	2.68334e-08	0.07855	1515	Blood	Circulatingepithelialcells
8	75860946	C	A	0.00669518	0.00109925	1.4891e-09	0.3954	1515	Blood	Classicalmonocytes
17	522259	G	C	-0.0231642	0.00400549	9.22933e-09	0.2198	1515	Blood	Erythroidcells
15	37934272	C	T	0.00626915	0.00113277	3.79303e-08	0.1393	1515	Blood	Intermediatemonocytes
24	42074705	C	T	-0.0144696	0.0024707	6.01864e-09	0.05281	1515	Blood	Intermediatemonocytes
3	33022235	T	C	-0.0138142	0.00213882	1.50131e-10	0.05017	1515	Blood	Intermediatemonocytes
10	22194795	C	T	-0.00601301	0.00107554	2.76726e-08	0.3766	1515	Blood	NKcells
11	49191264	G	A	0.00588852	0.000984416	2.86874e-09	0.2304	1515	Blood	NKcells
20	5780486	T	C	-0.00597495	0.00101469	4.98865e-09	0.3251	1515	Blood	NKcells
8	11197745	C	T	-0.00504084	0.000855824	4.94184e-09	0.4983	1515	Blood	NKcells
8	75860606	C	G	-0.00650303	0.00112503	9.38076e-09	0.4307	1515	Blood	NKcells
14	56940904	T	C	0.0048957	0.000776343	7.34924e-10	0.1448	487	CNS	Bloodvascularendothelialcells
19	12198257	A	G	-0.014657	0.0024989	9.17571e-09	0.3912	487	CNS	Fibroblasts
3	50614572	G	A	0.0301788	0.0052778	2.06602e-08	0.09548	487	CNS	Oligodendrocytes
30	138979766	C	T	0.027081	0.00487262	4.90213e-08	0.1263	487	CNS	Oligodendrocytes
10	19330552	A	G	-0.0108819	0.00189772	1.89147e-08	0.1674	487	CNS	Smoothmusclecells
19	20391788	A	T	0.0138179	0.002416	2.05173e-08	0.1848	487	CNS	Smoothmusclecells
2	17885361	G	T	-0.0088531	0.00153826	1.68569e-08	0.1253	487	CNS	Smoothmusclecells
28	12879268	G	A	0.0241047	0.00362902	3.42458e-09	0.09091	99	Colon	Bloodvascularendothelialcells
29	28702836	G	A	-0.125136	0.020762	4.86688e-08	0.07071	99	Colon	Gobletcells
28	28967974	A	G	0.0404687	0.00591477	1.42538e-09	0.06566	99	Colon	Macrophages
2	98171473	T	C	0.164271	0.0254864	8.06886e-09	0.07576	99	Colon	Otherimmunecells
29	28702836	G	A	0.149001	0.0230881	7.78719e-09	0.07071	99	Colon	Otherimmunecells
21	20120561	A	G	0.00955338	0.00155831	3.13101e-08	0.07576	99	Colon	Plasmacells
5	25633301	A	C	0.013742	0.00187335	1.59712e-10	0.06061	99	Colon	Plasmacells
22	16198734	A	T	0.0481578	0.00637692	1.63822e-08	0.1607	56	Duodenum	Bloodvascularendothelialcells
2	72176057	G	T	-0.0496954	0.00792891	1.56137e-08	0.4667	105	Epididymis	Fibroblasts
18	15901405	T	C	0.233252	0.0399414	2.88456e-08	0.0618	178	Hypothalamus	Astrocytes
11	2034702	A	C	-0.216532	0.0337817	1.60196e-09	0.1404	178	Hypothalamus	Microglia
5	119919203	T	C	0.298696	0.0514885	3.48907e-08	0.05618	178	Hypothalamus	Microglia
28	32341026	A	G	0.951365	0.113152	2.31282e-14	0.05056	178	Hypothalamus	Oligodendrocytes
11	2034702	A	C	0.23685	0.038198	4.71044e-09	0.1404	178	Hypothalamus	Tcells
19	12913605	T	C	0.0161776	0.00199681	1.95272e-12	0.06693	127	Ileum	Lymphaticendothelialcells
29	50782360	T	C	0.0149799	0.00261243	3.95811e-08	0.1183	241	Jejunum	Bcells
28	43709133	A	G	0.0128323	0.00209832	5.6399e-09	0.05809	241	Jejunum	Macrophages
30	45912478	T	G	0.0142826	0.00218979	6.48955e-10	0.08506	241	Jejunum	Macrophages
5	96834800	G	C	0.016805	0.00262201	1.19405e-09	0.05602	241	Jejunum	Macrophages
11	47874592	A	G	0.0363171	0.00628647	3.19101e-08	0.05394	241	Jejunum	Migratorydendriticcells
25	10720247	C	G	0.00837715	0.0014611	3.97004e-08	0.09336	241	Jejunum	Plasmacells
18	47484324	G	A	0.0143869	0.00250904	4.52897e-08	0.4163	227	LargeIntestine	Bcells
21	41278005	T	C	0.0343508	0.00532088	1.13709e-09	0.05066	227	LargeIntestine	Bloodvascularendothelialcells
4	46151302	A	G	0.0325899	0.00535131	7.59516e-09	0.05066	227	LargeIntestine	Conventionaldendriticcellstype1
22	31792749	T	C	0.0206466	0.00359274	4.25291e-08	0.0793	227	LargeIntestine	Macrophages
26	14314663	A	G	-0.00844968	0.00140586	1.13948e-08	0.467	227	LargeIntestine	ProliferativeTcells
4	113071372	C	T	-0.00332662	0.000579765	1.19021e-08	0.4655	1347	Liver	Hepatocytes
1	59234445	T	C	-0.0117637	0.00184224	2.36875e-10	0.05011	1347	Liver	Myofibroblasts
1	96440529	C	T	-0.0102822	0.00167551	1.11506e-09	0.06125	1347	Liver	Myofibroblasts
1	97459961	A	G	-0.00825	0.00148164	3.1219e-08	0.05568	1347	Liver	Myofibroblasts
10	53203672	T	G	0.0136605	0.00228894	3.08873e-09	0.05642	1347	Liver	Myofibroblasts
10	72825693	A	G	-0.00907103	0.0014651	7.97081e-10	0.05865	1347	Liver	Myofibroblasts
11	100705328	T	C	-0.0115922	0.00198877	7.02366e-09	0.05791	1347	Liver	Myofibroblasts
12	29255801	C	T	-0.0138051	0.00205019	2.47318e-11	0.05011	1347	Liver	Myofibroblasts
12	50555810	T	C	-0.0114315	0.0019902	1.1497e-08	0.05419	1347	Liver	Myofibroblasts
13	10548370	C	T	-0.00902542	0.00145357	7.14382e-10	0.05197	1347	Liver	Myofibroblasts
13	42707707	G	C	-0.0143789	0.00200861	1.35585e-12	0.05122	1347	Liver	Myofibroblasts
14	25982859	T	C	0.00648036	0.00112425	1.02288e-08	0.06088	1347	Liver	Myofibroblasts
14	47429612	C	T	-0.0136912	0.00203887	2.79628e-11	0.05011	1347	Liver	Myofibroblasts
16	53960058	G	A	-0.00836434	0.00140579	3.44121e-09	0.05791	1347	Liver	Myofibroblasts
18	17055561	C	G	0.00715958	0.00129237	3.65671e-08	0.05308	1347	Liver	Myofibroblasts
18	24949858	G	C	-0.0116273	0.00173743	3.25309e-11	0.05048	1347	Liver	Myofibroblasts
18	50290773	C	T	-0.0101459	0.00166935	1.59682e-09	0.05011	1347	Liver	Myofibroblasts
18	59908901	G	A	0.00685518	0.00108758	3.97992e-10	0.05419	1347	Liver	Myofibroblasts
19	23424637	G	A	-0.011816	0.00170248	6.1373e-12	0.05197	1347	Liver	Myofibroblasts
19	55145258	T	C	-0.00910882	0.00141229	1.57463e-10	0.05011	1347	Liver	Myofibroblasts
2	130316941	T	C	-0.0124068	0.00186655	4.38558e-11	0.06125	1347	Liver	Myofibroblasts
21	66840389	G	A	-0.0113983	0.00186218	1.22793e-09	0.05122	1347	Liver	Myofibroblasts
22	50179644	A	G	-0.0114855	0.00196524	6.41612e-09	0.0516	1347	Liver	Myofibroblasts
23	42727658	C	T	-0.0119554	0.00180913	5.64493e-11	0.05085	1347	Liver	Myofibroblasts
25	10708713	A	G	-0.00818679	0.00145114	2.06305e-08	0.05642	1347	Liver	Myofibroblasts
27	33241325	G	A	-0.0181356	0.00189487	5.08824e-21	0.05382	1347	Liver	Myofibroblasts
28	19605630	A	T	0.00276781	0.000498185	3.34563e-08	0.2086	1347	Liver	Myofibroblasts
29	47381685	G	C	-0.0143702	0.00200118	1.15968e-12	0.0516	1347	Liver	Myofibroblasts
3	110657232	A	C	-0.0109013	0.00176738	9.20173e-10	0.05234	1347	Liver	Myofibroblasts
30	4116984	G	A	-0.0122404	0.00185651	6.22982e-11	0.05048	1347	Liver	Myofibroblasts
4	9175832	T	C	-0.00601015	0.00104363	1.05457e-08	0.05048	1347	Liver	Myofibroblasts
4	119729745	C	T	-0.0155668	0.00183061	4.95515e-17	0.05011	1347	Liver	Myofibroblasts
5	60408216	C	T	-0.0162147	0.00198741	7.8846e-16	0.05679	1347	Liver	Myofibroblasts
6	58611299	A	G	-0.015721	0.00201738	1.32969e-14	0.05197	1347	Liver	Myofibroblasts
7	17788520	G	A	-0.0142972	0.0020944	1.32985e-11	0.05754	1347	Liver	Myofibroblasts
8	7598263	A	G	-0.0104273	0.00183645	1.67759e-08	0.05048	1347	Liver	Myofibroblasts
8	46550106	G	A	-0.0103799	0.00170049	1.36075e-09	0.05754	1347	Liver	Myofibroblasts
8	70689697	T	C	-0.0101343	0.0017841	1.65491e-08	0.05345	1347	Liver	Myofibroblasts
9	101771056	T	C	-0.00693913	0.00111479	6.49138e-10	0.05457	1347	Liver	Myofibroblasts
30	127701898	T	G	0.0207614	0.0037232	3.91133e-08	0.4722	593	Lung	Alveolarepithelialtype2cells
30	119345184	G	T	0.00244297	0.000432433	2.62389e-08	0.172	593	Lung	Ciliatedcells
1	71638673	T	G	-0.0101622	0.00153641	7.54864e-11	0.1813	830	MammaryGland	Conventionaldendriticcellstype1
19	58260689	A	C	0.00936526	0.00158116	5.01142e-09	0.05181	830	MammaryGland	Conventionaldendriticcellstype1
28	25576579	A	T	-0.042776	0.00694587	1.25441e-09	0.0753	830	MammaryGland	Luminalcells
1	71636374	G	T	0.0532402	0.00659658	3.15362e-15	0.1849	830	MammaryGland	Macrophages
15	51803703	C	T	0.0475468	0.00822808	1.14579e-08	0.05361	830	MammaryGland	Macrophages
19	55275890	G	A	0.0438489	0.00592565	4.02265e-13	0.1133	830	MammaryGland	Macrophages
23	27522649	A	T	0.0302279	0.00535352	2.40592e-08	0.1373	830	MammaryGland	Macrophages
2	106192255	A	G	0.0269978	0.00447647	2.67006e-09	0.1524	830	MammaryGland	Neutrophils
8	41971529	G	A	0.0068263	0.00120066	1.93502e-08	0.1102	830	MammaryGland	Plasmacells
7	102159525	G	A	0.00666997	0.0011173	3.82172e-09	0.2873	830	MammaryGland	Smoothmusclecells
5	112018849	C	T	0.0602131	0.0102093	1.97177e-08	0.1338	198	PituitaryGland	Fibroblasts
29	29247626	A	C	-0.0178546	0.00279688	1.62324e-09	0.1414	198	PituitaryGland	Smoothmusclecells
26	8706203	C	T	-0.0761087	0.0120015	2.53399e-09	0.06829	205	Placenta	Binucleatetrophoblastcells
4	63881550	A	C	0.0341937	0.0059427	4.74644e-08	0.0878	205	Placenta	Fibroblasts
10	84956736	T	C	0.0242006	0.00399627	1.0748e-08	0.3415	205	Placenta	Macrophages
3	91292665	A	G	0.0316983	0.00506394	3.84996e-09	0.09512	205	Placenta	Macrophages
6	20026186	A	G	0.0372444	0.00645085	4.31446e-08	0.07317	205	Placenta	Macrophages
19	8620398	C	T	-0.0620438	0.0100904	6.74257e-09	0.08049	205	Placenta	Mesenchymalstemcells
10	76695596	A	G	0.0123496	0.00208112	1.96586e-08	0.06098	205	Placenta	Neutrophils
21	69738617	A	T	0.0173572	0.00281459	6.15652e-09	0.07805	205	Placenta	Proliferativeuninucleatetrophoblastcells
22	51014404	T	C	0.0103387	0.00164543	3.41303e-09	0.07317	205	Placenta	Tcells
14	850082	C	T	0.0698593	0.0110087	2.48004e-09	0.05854	205	Placenta	Uninucleatetrophoblastcells
19	18007215	A	C	0.0668642	0.0114677	3.26703e-08	0.06585	205	Placenta	Uninucleatetrophoblastcells
2	129780002	C	T	0.0835505	0.0132565	3.09271e-09	0.05854	205	Placenta	Uninucleatetrophoblastcells
24	2220291	T	A	0.062753	0.0106352	2.31972e-08	0.07073	205	Placenta	Uninucleatetrophoblastcells
8	101745762	T	C	0.0728721	0.0123804	2.49039e-08	0.05366	205	Placenta	Uninucleatetrophoblastcells
1	59756518	C	T	0.00849935	0.0014112	2.53058e-09	0.05654	902	Rumen	Fibroblasts
10	22194418	T	C	0.00720798	0.00100285	1.42344e-12	0.1092	902	Rumen	Fibroblasts
10	44913579	A	G	0.00704159	0.000814476	2.56115e-17	0.2561	902	Rumen	Fibroblasts
10	85073818	A	G	0.00481894	0.00081474	4.78092e-09	0.2395	902	Rumen	Fibroblasts
11	63332480	A	G	0.00551393	0.000962364	1.38863e-08	0.1053	902	Rumen	Fibroblasts
11	94833905	G	A	0.00516967	0.000753152	1.27452e-11	0.3503	902	Rumen	Fibroblasts
12	18095810	C	T	0.0075439	0.000932602	2.01962e-15	0.2849	902	Rumen	Fibroblasts
15	56339969	T	C	0.00450265	0.000752526	3.1948e-09	0.2589	902	Rumen	Fibroblasts
16	43335511	A	G	0.00489347	0.000813856	2.68662e-09	0.3354	902	Rumen	Fibroblasts
16	54725842	A	G	0.004221	0.000731867	1.11916e-08	0.378	902	Rumen	Fibroblasts
18	2053483	T	C	0.00701337	0.00105472	5.19908e-11	0.2062	902	Rumen	Fibroblasts
18	23936075	A	G	0.00569214	0.000894642	3.21108e-10	0.3465	902	Rumen	Fibroblasts
2	47896533	A	G	0.00549179	0.000842666	1.21417e-10	0.2744	902	Rumen	Fibroblasts
21	13957657	G	A	0.00483792	0.00086484	2.975e-08	0.1547	902	Rumen	Fibroblasts
22	51119881	A	G	0.00557563	0.000866618	2.05617e-10	0.2683	902	Rumen	Fibroblasts
26	14056729	T	C	0.00692487	0.000809162	5.16998e-17	0.3149	902	Rumen	Fibroblasts
28	30590659	A	G	0.00649663	0.000920606	3.48558e-12	0.2167	902	Rumen	Fibroblasts
3	116880200	A	C	0.00555776	0.000890688	6.84297e-10	0.2106	902	Rumen	Fibroblasts
30	37262804	T	C	0.00607398	0.00084	1.05384e-12	0.3919	902	Rumen	Fibroblasts
30	86675181	T	G	0.00447743	0.000696868	2.1716e-10	0.4141	902	Rumen	Fibroblasts
30	102325946	C	A	0.00578182	0.00101205	1.52575e-08	0.4146	902	Rumen	Fibroblasts
30	102333744	A	G	-0.00598164	0.000965135	8.84786e-10	0.2456	902	Rumen	Fibroblasts
4	93189700	A	G	0.00628032	0.000896173	4.85876e-12	0.3049	902	Rumen	Fibroblasts
4	104638227	T	C	0.00532418	0.000855371	7.51992e-10	0.3021	902	Rumen	Fibroblasts
5	35523850	G	A	0.00658435	0.00089824	5.26448e-13	0.2977	902	Rumen	Fibroblasts
5	53786771	A	G	0.00529595	0.000730708	9.37836e-13	0.1973	902	Rumen	Fibroblasts
6	59762665	C	T	0.00659837	0.000925264	2.09612e-12	0.2844	902	Rumen	Fibroblasts
8	74632265	A	G	0.00474415	0.000756972	5.7844e-10	0.3387	902	Rumen	Fibroblasts
8	105410782	T	C	0.00545948	0.00086318	4.05586e-10	0.1835	902	Rumen	Fibroblasts
9	41851751	A	G	0.00506246	0.000766878	7.0896e-11	0.3869	902	Rumen	Fibroblasts
30	102402993	A	C	0.0282601	0.00494522	1.51152e-08	0.1885	902	Rumen	Smoothmusclecells
17	52809858	C	A	0.037548	0.00629119	3.49074e-09	0.1436	902	Rumen	Spinouscells
6	71172594	G	A	0.0182008	0.00324482	2.73381e-08	0.4839	902	Rumen	Spinouscells
13	29801095	T	C	0.0367125	0.00519749	1.04136e-08	0.1184	76	Skin	Follicularcells
26	46772274	T	C	0.0390377	0.00553314	1.07042e-08	0.07895	76	Skin	Follicularcells
13	76138406	T	C	0.0198849	0.00286507	1.56938e-08	0.08553	76	Skin	WC1Tcells
16	47166551	A	G	0.0158769	0.0023381	2.58939e-08	0.1842	76	Skin	WC1Tcells
19	40142117	G	A	0.0180657	0.00273573	4.83901e-08	0.07895	76	Skin	WC1Tcells
30	133185444	A	C	-0.0147202	0.00249493	1.25915e-08	0.1268	272	Testis	Bcells
23	31361502	A	T	0.022619	0.003758	6.69489e-09	0.1011	272	Testis	Bloodvascularendothelialcells
21	23272569	A	G	-0.0133474	0.00179704	2.03404e-12	0.3658	272	Testis	Differentiatingspermatogonia
22	21392760	G	A	-0.092519	0.0133605	4.13862e-11	0.0625	272	Testis	Fibroblasts
9	31791329	G	A	0.0168593	0.00253517	2.03128e-10	0.05331	272	Testis	Lymphaticendothelialcells
1	58377999	T	C	0.0585867	0.0100077	1.60312e-08	0.05882	272	Testis	Smoothmusclecells
1	111915909	A	T	-0.0576048	0.00922505	1.97282e-09	0.05331	272	Testis	Smoothmusclecells
16	79112969	C	T	-0.0442929	0.00768357	2.55856e-08	0.09743	272	Testis	Smoothmusclecells
9	45597188	C	A	-0.0662564	0.00872254	7.2001e-13	0.125	272	Testis	Smoothmusclecells
7	62651145	G	C	0.0488722	0.0076923	1.08116e-09	0.05147	272	Testis	Spermatids
7	34843513	T	C	-0.0310771	0.00519925	8.36313e-09	0.08088	272	Testis	Spermatocytes
4	119081199	C	T	-0.0366195	0.00637195	2.80369e-08	0.05147	272	Testis	Undifferentiatedspermatogonia
8	16867891	G	T	0.0129401	0.00232691	3.73876e-08	0.06002	883	Uterus	Bloodvascularendothelialcells
22	50436526	T	C	0.0436053	0.00752831	1.02462e-08	0.08267	883	Uterus	Ciliatedcells
30	37070016	G	A	-0.00755548	0.00126044	3.18299e-09	0.4592	883	Uterus	Lymphaticendothelialcells
13	23432741	G	A	0.012285	0.00220429	3.49624e-08	0.05153	883	Uterus	Neutrophils
23	24802540	C	T	-0.0114005	0.00187472	1.9054e-09	0.4428	883	Uterus	Smoothmusclecells

## Sheet: Supplementary Table 5
Table S5. Significant association of 168 fQTL with 44 complex traits.
variant_id	trait	Tissue	Cell type	P	p_permutation
29_50782360	Sire_Calv_Ease	Jejunum	Bcells	9.86198e-05	3.57143e-13
14_850082	gestleng	Placenta	Uninucleatetrophoblastcells	2.52064e-05	9.86666e-08
14_850082	KETO	Placenta	Uninucleatetrophoblastcells	1.30733e-05	4.88777e-05
14_850082	MAST	Placenta	Uninucleatetrophoblastcells	1.38089e-10	1.06732e-05
14_850082	Early_calving	Placenta	Uninucleatetrophoblastcells	2.04314e-05	6.79236e-05
14_850082	Livability	Placenta	Uninucleatetrophoblastcells	7.47514e-15	0.000129542
14_850082	Net_Merit	Placenta	Uninucleatetrophoblastcells	2.1119e-56	8.83006e-09
14_850082	SCS	Placenta	Uninucleatetrophoblastcells	4.09301e-15	3.45423e-06
14_850082	Body_depth	Placenta	Uninucleatetrophoblastcells	1.79131e-05	7.75513e-09
14_850082	Fore_udder_att	Placenta	Uninucleatetrophoblastcells	0.00025985	6.17517e-07
14_850082	Udder_depth	Placenta	Uninucleatetrophoblastcells	0.000189193	4.89086e-07
14_850082	Fat	Placenta	Uninucleatetrophoblastcells	2.67138e-173	2.31002e-06
11_63332480	Milk	Rumen	Fibroblasts	8.17776e-05	7.484e-05
14_850082	Milk	Placenta	Uninucleatetrophoblastcells	2.07529e-121	7.484e-05
14_850082	Pro_Percent	Placenta	Uninucleatetrophoblastcells	2.62759e-137	1.24259e-17
14_850082	Protein	Placenta	Uninucleatetrophoblastcells	2.35064e-33	3.79742e-05

## Sheet: Supplementary Table 6
Table S6. Summary of bulk eQTL discovery across 22 cattle tissues.
Tissue	Sample size	cis-eGenes	Tested PCGs	Prop. cis-eGenes
Blood	1515	11009	14970	0.735404
CNS	487	5532	17243	0.320826
Epididymis	105	3964	19001	0.208621
Hypothalamus	178	3690	16851	0.218978
Ileum	127	1942	16844	0.115293
Jejunum	241	4065	16733	0.242933
LargeIntestine	227	2881	16678	0.172743
Liver	1347	10105	15355	0.658092
Lung	593	9987	16786	0.59496
LymphNode	395	9046	16600	0.54494
MammaryGland	830	8223	15958	0.51529
PituitaryGland	198	4561	17490	0.260778
Placenta	205	2357	16750	0.140716
Rumen	902	7075	15753	0.449121
Skin	76	916	16716	0.0547978
Testis	272	7228	19129	0.377856
Uterus	883	8930	17090	0.522528

## Sheet: Supplementary Table 7
Table S7. Summary of three cell-type eQTL discovery across 22 cattle tissues.
CellType	Tissue	Sample size	cis-cseGenes	Tested PCGs	Prop. cis-cseGenes	cis-cieGenes	Tested PCGs	Prop. cis-cieGenes	cis-state_ieGenes	Prop. cis-state_iGenes
Bcells	Blood	1415	5278	12379	0.426367	7010	14970	0.46827	8855	0.591516
CD4Tcells	Blood	1415	4728	12412	0.380922	7032	14970	0.469739	7782	0.51984
Classicalmonocytes	Blood	1415	268	3608	0.0742794	5568	14970	0.371944	9451	0.631329
Erythroidcells	Blood	1415	99	2066	0.0479187	1128	14970	0.0753507	0	0
WC1Tcells	Blood	1415	592	4388	0.134913	740	14970	0.0494322	6362	0.424983
Astrocytes	CNS	487	636	12190	0.0521739	2450	17243	0.142087	2965	0.171954
Endothelialcells	CNS	487	1754	14608	0.120071	3068	17243	0.177927	991	0.0574726
Fibroblasts	CNS	487	284	11824	0.0240189	196	17243	0.0113669	2485	0.144116
Mastcells	CNS	487	67	6258	0.0107063	2962	17243	0.17178	1369	0.0793945
Oligodendrocytes	CNS	487	328	11083	0.0295949	2509	17243	0.145508	3408	0.197645
SSTGABAergicneurons	CNS	487	638	13329	0.0478656	2672	17243	0.154961	2990	0.173404
VIPGABAergicneurons	CNS	487	367	11822	0.0310438	2656	17243	0.154034	0	0
Fibroblasts	Epididymis	105	1783	10176	0.175216	0	19001	0	0	0
Principalcells	Epididymis	105	2112	11925	0.177107	0	19001	0	0	0
Bcells	Ileum	127	225	2642	0.0851628	0	16844	0	0	0
Enterocytes	Ileum	127	22	1179	0.0186599	0	16844	0	0	0
Immunecells	Ileum	127	65	1113	0.0584007	0	16844	0	0	0
Enterocytes	Jejunum	241	1666	14218	0.117175	452	16733	0.0270125	0	0
Fibroblasts	Jejunum	241	0	14218	0	135	16733	0.00806789	0	0
Myofibroblasts	Jejunum	241	0	14218	0	79	16733	0.00472121	0	0
NKTcells	Jejunum	241	0	14218	0	62	16733	0.00370525	0	0
Enterocytes	LargeIntestine	227	9	41	0.219512	0	16678	0	0	0
Myofibroblasts	LargeIntestine	227	79	401	0.197007	0	16678	0	0	0
Hepatocytes	Liver	1347	7583	11788	0.643281	5114	15355	0.333051	4896	0.318854
Myofibroblasts	Liver	1347	3226	5661	0.569864	4630	15355	0.30153	0	0
Alveolarepithelialtype1cells	Lung	593	5780	14272	0.404989	477	16786	0.0284165	0	0
Alveolarepithelialtype2cells	Lung	593	2779	10795	0.257434	395	16786	0.0235315	0	0
Bloodvascularendothelialcells	Lung	593	5255	14025	0.374688	1188	16786	0.0707733	0	0
Fibroblasts	Lung	593	3642	12455	0.292413	1091	16786	0.0649946	0	0
[truncated: 27 more rows]

## Sheet: Supplementary Table 8
Table S8. Colocalization between cell-type fraction QTL (fQTL) and cell-type stratified eQTL (cseQTL)
[truncated: 22 more rows]

[truncated: 5 more sheets: Supplementary Table 9, Supplementary Table 10, Supplementary Table 11, Supplementary Table 12, Supplementary Table 13]
